# Supplementary material for: Central lung gene expression associates with myofibroblast features in idiopathic pulmonary fibrosis
Source: HighWire-hosted journal article supplement (doi:10.1136/bmjresp-2022-001391), 2023-02-01
Supplement: bmjresp-2022-001391supp003_data_supplement.xlsx [file bmjresp-2022-001391supp003_data_supplement.xlsx]

## Sheet: DEG (IPF.C vs CTR.C)
Ensembl ID	NCBI Gene ID	Gene Symbol	chr	chr.band	Description	Length	LogFoldChange	P.Value	FDR
ENSG00000123500	1300	COL10A1	6	6q21-q22	collagen, type X, alpha 1	3816	6.01525	4.96e-08	1.9e-05
ENSG00000170369	1470	CST2	20	20p11.21	cystatin SA	748	5.78427	1.8e-06	0.000137572
ENSG00000170373	1469	CST1	20	20p11.21	cystatin SN	872	5.68729	0.00170527	0.0164182
ENSG00000181617	260436	FDCSP	4	4q13|4q13	follicular dendritic cell secreted protein	566	5.4898	0.000100332	0.00224593
ENSG00000165376	9075	CLDN2	X	Xq22.3-q23	claudin 2	3410	5.22085	5.34e-09	5.12e-06
ENSG00000164694	84624	FNDC1	6	6q25	fibronectin type III domain containing 1	6854	5.05705	8.89e-08	2.53e-05
ENSG00000145536	170690	ADAMTS16	5	5p15	ADAM metallopeptidase with thrombospondin type 1 motif 16	5863	4.83312	1.54e-06	0.000125049
ENSG00000145423	6423	SFRP2	4	4q31.3	secreted frizzled-related protein 2	2032	4.79102	8.65e-08	2.53e-05
ENSG00000275896	5645	PRSS2	7	7q34	protease, serine 2	1716	4.77911	0.000399593	0.00591724
ENSG00000106819	54829	ASPN	9	9q22	asporin	2470	4.74658	2.46e-07	4e-05
ENSG00000125869	24141	LAMP5	20	20p12	lysosomal associated membrane protein family member 5	2042	4.60611	2.47e-07	4e-05
ENSG00000116031	50489	CD207	2	2p13	CD207 molecule, langerin	1869	4.60366	2.96e-05	0.000931814
ENSG00000106483	6424	SFRP4	7	7p14.1	secreted frizzled-related protein 4	3606	4.57161	3.69e-11	2.48e-07
ENSG00000211448	1734	DIO2	14	14q24.2-q24.3	deiodinase, iodothyronine, type II	7494	4.41117	4.95e-09	5.11e-06
ENSG00000132465	3512	JCHAIN	4	4q21	joining chain of multimeric IgA and IgM	1680	4.38174	3.81e-07	5.15e-05
ENSG00000054803	140689	CBLN4	20	20q13	cerebellin 4 precursor	3024	4.25592	1.38e-06	0.000114513
ENSG00000164220	2151	F2RL2	5	5q13	coagulation factor II (thrombin) receptor-like 2	3429	4.25201	4.37e-09	5.11e-06
ENSG00000160161	148113	CILP2	19	19p13.11	cartilage intermediate layer protein 2	4360	4.24762	4e-08	1.73e-05
ENSG00000165246	22829	NLGN4Y	Y	Yq11.221	neuroligin 4, Y-linked	8206	4.2451	1.76e-05	0.000663222
ENSG00000145824	9547	CXCL14	5	5q31	chemokine (C-X-C motif) ligand 14	1975	4.20566	1.34e-06	0.000113935
ENSG00000120332	63923	TNN	1	1q23-q24	tenascin N	5008	4.19353	3.58e-08	1.64e-05
ENSG00000172061	131578	LRRC15	3	3q29	leucine rich repeat containing 15	5940	4.17754	1.58e-07	3.17e-05
ENSG00000092009	1215	CMA1	14	14q11.2	chymase 1, mast cell	937	4.17496	9.86e-08	2.53e-05
ENSG00000012817	8284	KDM5D	Y	Yq11	lysine (K)-specific demethylase 5D	9463	4.16966	0.00321559	0.0259703
ENSG00000044524	2042	EPHA3	3	3p11.2	EPH receptor A3	6674	4.12653	3.6e-09	5.11e-06
ENSG00000134817	187	APLNR	11	11q12	apelin receptor	3738	4.12053	4.19e-07	5.26e-05
ENSG00000149090	25891	PAMR1	11	11p13	peptidase domain containing associated with muscle regeneration 1	3863	4.04921	2.59e-10	8.69e-07
ENSG00000164932	115908	CTHRC1	8	8q22.3	collagen triple helix repeat containing 1	1776	3.9545	4.43e-08	1.75e-05
ENSG00000117215	26279	PLA2G2D	1	1p36.12	phospholipase A2 group IID	2681	3.93062	2.86e-05	0.000920196
ENSG00000117600	9890	PLPPR4	1	1p21.2	phospholipid phosphatase related 4	5540	3.91495	9.98e-08	2.53e-05
ENSG00000005102	4222	MEOX1	17	17q21	mesenchyme homeobox 1	2707	3.89596	4.9e-07	5.83e-05
ENSG00000188293	374918	IGFL1	19	19q13.32	IGF like family member 1	769	3.87486	2.5e-05	0.000835259
ENSG00000101825	25878	MXRA5	X	Xp22.33	matrix-remodelling associated 5	9793	3.86331	2.78e-08	1.49e-05
ENSG00000187398	338645	LUZP2	11	11p14.3	leucine zipper protein 2	8851	3.81879	9.4e-07	8.9e-05
ENSG00000179639	2205	FCER1A	1	1q23	Fc fragment of IgE, high affinity I, receptor for; alpha polypeptide	1165	3.77806	5.84e-10	1.57e-06
ENSG00000099953	4320	MMP11	22	22q11.23	matrix metallopeptidase 11	5176	3.75424	0.00122482	0.012812
ENSG00000105664	1311	COMP	19	19p13.1	cartilage oligomeric matrix protein	3101	3.75058	3.96e-07	5.17e-05
ENSG00000141433	116	ADCYAP1	18	18p11	adenylate cyclase activating polypeptide 1 (pituitary)	3805	3.74196	6.56e-07	6.99e-05
ENSG00000187955	7373	COL14A1	8	8q23	collagen, type XIV, alpha 1	8647	3.70922	1.73e-06	0.000133239
ENSG00000135925	80326	WNT10A	2	2q35	wingless-type MMTV integration site family member 10A	3412	3.68244	4.58e-09	5.11e-06
ENSG00000123496	3598	IL13RA2	X	Xq23	interleukin 13 receptor subunit alpha 2	1626	3.63717	3.34e-06	0.000210892
ENSG00000138755	4283	CXCL9	4	4q21	chemokine (C-X-C motif) ligand 9	2740	3.60458	0.000158405	0.00313795
ENSG00000128606	10234	LRRC17	7	7q22.1	leucine rich repeat containing 17	2674	3.57821	4.76e-07	5.71e-05
ENSG00000169035	5650	KLK7	19	19q13.41	kallikrein related peptidase 7	2434	3.57079	0.000186673	0.00352135
ENSG00000133110	10631	POSTN	13	13q13.3	periostin, osteoblast specific factor	5464	3.56288	4.63e-05	0.00128185
ENSG00000187634	148398	SAMD11	1	1p36.33	sterile alpha motif domain containing 11	3214	3.55429	6.75e-11	3.02e-07
ENSG00000132639	6616	SNAP25	20	20p12-p11.2	synaptosome associated protein 25kDa	3357	3.53913	1.58e-07	3.17e-05
ENSG00000152049	23704	KCNE4	2	2q36.1	potassium channel, voltage gated subfamily E regulatory beta subunit 4	4124	3.53869	1.81e-11	2.44e-07
ENSG00000111087	2735	GLI1	12	12q13.2-q13.3	GLI family zinc finger 1	4204	3.53695	4.18e-08	1.75e-05
ENSG00000162692	7412	VCAM1	1	1p32-p31	vascular cell adhesion molecule 1	6049	3.51963	1.3e-07	2.82e-05
ENSG00000127241	5648	MASP1	3	3q27-q28	mannan-binding lectin serine peptidase 1 (C4/C2 activating component of Ra-reactive factor)	13161	3.50469	7.47e-09	6.27e-06
ENSG00000172987	60495	HPSE2	10	10q23-q24	heparanase 2 (inactive)	4421	3.46359	1.91e-06	0.000143189
ENSG00000116147	7143	TNR	1	1q24	tenascin R	12960	3.44881	6.35e-05	0.00161287
ENSG00000088882	56265	CPXM1	20	20p13	carboxypeptidase X (M14 family), member 1	2391	3.44403	1.61e-05	0.000623181
ENSG00000158477	909	CD1A	1	1q23.1	CD1a molecule	2096	3.42857	0.000203891	0.00375131
ENSG00000101463	79953	SYNDIG1	20	20p11.21	synapse differentiation inducing 1	2847	3.4194	1.04e-08	7.77e-06
ENSG00000254709	100423062	IGLL5	22	22q11.22	immunoglobulin lambda-like polypeptide 5	1335	3.41843	8.54e-06	0.000396901
ENSG00000158488	913	CD1E	1	1q23.1	CD1e molecule	2203	3.41612	7.54e-08	2.45e-05
ENSG00000166448	222865	TMEM130	7	7q22.1	transmembrane protein 130	4663	3.4071	2.27e-05	0.000794136
ENSG00000106823	1842	ECM2	9	9q22.3	extracellular matrix protein 2, female organ and adipocyte specific	4916	3.38483	1.46e-07	3.02e-05
ENSG00000170961	3037	HAS2	8	8q24.12	hyaluronan synthase 2	4190	3.37242	1.6e-05	0.000623181
ENSG00000137745	4322	MMP13	11	11q22.3	matrix metallopeptidase 13	2834	3.36805	0.000108365	0.00240571
ENSG00000156103	4325	MMP16	8	8q21.3	matrix metallopeptidase 16	12115	3.31401	3.91e-07	5.15e-05
ENSG00000179954	284297	SSC5D	19	19q13.42	scavenger receptor cysteine rich family, 5 domains	7314	3.31175	1.66e-05	0.00063848
ENSG00000121898	119587	CPXM2	10	10q26.13	carboxypeptidase X (M14 family), member 2	4859	3.30433	2.72e-07	4.34e-05
ENSG00000172156	6356	CCL11	17	17q12	chemokine (C-C motif) ligand 11	1079	3.30291	5.39e-06	0.000287974
ENSG00000244694	442213	PTCHD4	6	6p12.3	patched domain containing 4	5177	3.28933	2.2e-07	3.84e-05
ENSG00000143297	83416	FCRL5	1	1q21	Fc receptor-like 5	12419	3.28776	7.78e-07	7.91e-05
ENSG00000102271	56062	KLHL4	X	Xq21.3	kelch like family member 4	5818	3.26534	7.07e-10	1.58e-06
ENSG00000143320	1382	CRABP2	1	1q21.3	cellular retinoic acid binding protein 2	1100	3.25812	2.76e-06	0.000186179
ENSG00000151572	121601	ANO4	12	12q23.1	anoctamin 4	4997	3.25609	2.52e-06	0.000172739
ENSG00000087494	5744	PTHLH	12	12p12.1-p11.2	parathyroid hormone-like hormone	3377	3.23584	8.43e-10	1.62e-06
ENSG00000162670	339479	BRINP3	1	1q31.1	bone morphogenetic protein/retinoic acid inducible neural-specific 3	4287	3.21334	3.44e-08	1.64e-05
ENSG00000204866	147920	IGFL2	19	19q13.32	IGF like family member 2	2426	3.20823	3.95e-06	0.000234076
ENSG00000140287	3067	HDC	15	15q21.2	histidine decarboxylase	3956	3.19047	2.06e-06	0.000152521
ENSG00000167768	3848	KRT1	12	12q13.13	keratin 1, type II	2488	3.18698	1.72e-05	0.000655743
ENSG00000139330	11081	KERA	12	12q22	keratocan	2162	3.17526	4.69e-09	5.11e-06
ENSG00000164530	221476	PI16	6	6p21.2	peptidase inhibitor 16	2332	3.15875	2.35e-05	0.000814373
ENSG00000170476	51237	MZB1	5	5q31.2	marginal zone B and B1 cell-specific protein	2273	3.13809	2.13e-06	0.000152767
ENSG00000183114	163933	FAM43B	1	1p36.12	family with sequence similarity 43 member B	2572	3.11629	3.25e-08	1.64e-05
ENSG00000101134	55816	DOK5	20	20q13.2	docking protein 5	2604	3.1091	2.03e-08	1.37e-05
ENSG00000185008	6092	ROBO2	3	3p12.3	roundabout guidance receptor 2	16663	3.1041	9.42e-06	0.000421239
ENSG00000170558	1000	CDH2	18	18q11.2	cadherin 2, type 1, N-cadherin (neuronal)	4950	3.09578	2.24e-05	0.000789059
ENSG00000116748	270	AMPD1	1	1p13	adenosine monophosphate deaminase 1	2496	3.09442	5.98e-05	0.00154381
ENSG00000181104	2149	F2R	5	5q13	coagulation factor II (thrombin) receptor	4066	3.06577	1.88e-06	0.000141759
ENSG00000117122	4237	MFAP2	1	1p36.1-p35	microfibrillar associated protein 2	2915	3.06344	2.51e-09	4.22e-06
ENSG00000198542	9358	ITGBL1	13	13q33	integrin subunit beta like 1	6174	3.05697	7.23e-09	6.27e-06
ENSG00000117152	5999	RGS4	1	1q23.3	regulator of G-protein signaling 4	4836	3.05529	1.44e-06	0.000118459
ENSG00000149735	170589	GPHA2	11	11q13.1	glycoprotein hormone alpha 2	926	3.05432	9.97e-06	0.000437668
ENSG00000106809	4969	OGN	9	9q22	osteoglycin	3321	3.04752	9.44e-06	0.000421239
ENSG00000171951	7857	SCG2	2	2q35-q36	secretogranin II	2719	3.04544	1.78e-08	1.26e-05
ENSG00000186832	3868	KRT16	17	17q21.2	keratin 16, type I	2475	3.04077	5.37e-05	0.00144057
ENSG00000138823	4547	MTTP	4	4q24	microsomal triglyceride transfer protein	5398	3.04057	5.71e-07	6.39e-05
ENSG00000105369	973	CD79A	19	19q13.2	CD79a molecule	1503	3.03695	1.81e-05	0.000678437
ENSG00000172724	6363	CCL19	9	9p13	chemokine (C-C motif) ligand 19	777	3.03628	0.000260333	0.00442599
ENSG00000172020	2596	GAP43	3	3q13.31	growth associated protein 43	2087	3.03579	8.64e-06	0.000397539
ENSG00000122691	7291	TWIST1	7	7p21.2	twist family bHLH transcription factor 1	2033	3.03565	1.1e-06	9.88e-05
ENSG00000169469	6699	SPRR1B	1	1q21-q22	small proline-rich protein 1B	620	3.02367	0.00113267	0.0120833
ENSG00000010932	2326	FMO1	1	1q24.3	flavin containing monooxygenase 1	3602	3.01953	2.89e-07	4.41e-05
ENSG00000137573	23213	SULF1	8	8q13.2	sulfatase 1	9404	3.01775	5.06e-07	5.85e-05
ENSG00000137673	4316	MMP7	11	11q22.2	matrix metallopeptidase 7	2323	3.01382	3.65e-06	0.000221604
ENSG00000187689	401138	AMTN	4	4q13.3	amelotin	1037	3.00934	5.57e-06	0.00029226
ENSG00000168453	55806	HR	8	8p21.2	hair growth associated	8784	3.00461	6e-08	2.12e-05
ENSG00000178734	729420	LMO7DN	13	13q22.2	LMO7 downstream neighbor	1167	3.00202	4.05e-06	0.000235495
ENSG00000139194	83758	RBP5	12	12p13.31	retinol binding protein 5	1369	2.99708	3.27e-06	0.000208212
ENSG00000166428	122618	PLD4	14	14q32.33	phospholipase D family member 4	6874	2.98367	2.1e-06	0.000152767
ENSG00000144229	80731	THSD7B	2	2q22.1	thrombospondin type 1 domain containing 7B	6761	2.97315	5.36e-05	0.00144057
ENSG00000103742	57722	IGDCC4	15	15q22.31	immunoglobulin superfamily, DCC subclass, member 4	7764	2.96719	1.56e-06	0.00012576
ENSG00000145681	1404	HAPLN1	5	5q14.3	hyaluronan and proteoglycan link protein 1	6956	2.96669	0.00143934	0.0144482
ENSG00000100450	2999	GZMH	14	14q11.2	granzyme H	951	2.95699	0.000153796	0.00307487
ENSG00000183036	5121	PCP4	21	21q22.2	Purkinje cell protein 4	1106	2.93767	0.00075146	0.00906001
ENSG00000176678	2300	FOXL1	16	16q24	forkhead box L1	3742	2.93509	2.76e-08	1.49e-05
ENSG00000183908	219527	LRRC55	11	11q12.1	leucine rich repeat containing 55	5410	2.93227	7.66e-06	0.000370235
ENSG00000136881	570	BAAT	9	9q22.3	bile acid-CoA:amino acid N-acyltransferase	3389	2.93013	0.000703165	0.00870434
ENSG00000119681	4053	LTBP2	14	14q24	latent transforming growth factor beta binding protein 2	9091	2.92874	2.12e-06	0.000152767
ENSG00000204291	1306	COL15A1	9	9q21-q22	collagen, type XV, alpha 1	6653	2.92282	1.89e-05	0.000705942
ENSG00000143494	79805	VASH2	1	1q32.3	vasohibin 2	9086	2.90779	7.88e-06	0.000378006
ENSG00000139193	939	CD27	12	12p13	CD27 molecule	1410	2.90317	2.17e-06	0.000153324
ENSG00000007908	6401	SELE	1	1q24.2	selectin E	4585	2.89209	0.00611863	0.0410822
ENSG00000125675	2892	GRIA3	X	Xq25	glutamate receptor, ionotropic, AMPA 3	6484	2.89028	3.59e-08	1.64e-05
ENSG00000145362	287	ANK2	4	4q25-q27	ankyrin 2, neuronal	18224	2.88409	1.61e-06	0.000127124
ENSG00000166670	4319	MMP10	11	11q22.3	matrix metallopeptidase 10	1758	2.88008	0.00336615	0.0266102
ENSG00000179934	1237	CCR8	3	3p22	chemokine (C-C motif) receptor 8	1318	2.87582	3.52e-05	0.00105948
ENSG00000151952	121256	TMEM132D	12	12q24.33	transmembrane protein 132D	7094	2.86951	1.69e-05	0.000643098
ENSG00000176083	257101	ZNF683	1	1p36.11	zinc finger protein 683	2379	2.86926	3.34e-05	0.00101856
ENSG00000102962	6367	CCL22	16	16q13	chemokine (C-C motif) ligand 22	2929	2.86452	0.000160956	0.0031838
ENSG00000149534	2206	MS4A2	11	11q12-q13	membrane-spanning 4-domains, subfamily A, member 2	4453	2.86251	9.47e-07	8.9e-05
ENSG00000138944	85352	KIAA1644	22	-	KIAA1644	6751	2.8616	1.36e-07	2.86e-05
ENSG00000177098	6330	SCN4B	11	11q23.3	sodium channel, voltage gated, type IV beta subunit	5649	2.85906	1.71e-07	3.31e-05
ENSG00000048462	608	TNFRSF17	16	16p13.1	tumor necrosis factor receptor superfamily member 17	1118	2.82034	6.32e-06	0.000314538
ENSG00000148848	8038	ADAM12	10	10q26	ADAM metallopeptidase domain 12	9860	2.81996	8.89e-06	0.000406281
ENSG00000078098	2191	FAP	2	2q23	fibroblast activation protein alpha	7003	2.81458	3.24e-05	0.00099201
ENSG00000102802	84935	MEDAG	13	13q12.3	mesenteric estrogen-dependent adipogenesis	2374	2.81147	8.59e-06	0.000396974
ENSG00000143768	7044	LEFTY2	1	1q42.1	left-right determination factor 2	2392	2.79303	4.36e-06	0.000248374
ENSG00000158485	910	CD1B	1	1q23.1	CD1b molecule	1395	2.79241	0.000197396	0.0036615
ENSG00000077274	827	CAPN6	X	Xq23	calpain 6	3568	2.78202	1.1e-07	2.61e-05
ENSG00000139155	53919	SLCO1C1	12	12p12.2	solute carrier organic anion transporter family member 1C1	4860	2.76396	3.53e-06	0.000217267
ENSG00000107562	6387	CXCL12	10	10q11.1	chemokine (C-X-C motif) ligand 12	6077	2.75832	2.93e-07	4.42e-05
ENSG00000137558	51050	PI15	8	8q21.11	peptidase inhibitor 15	7156	2.75006	0.000172542	0.00337288
ENSG00000102452	259232	NALCN	13	13q32.3	sodium leak channel, non selective	8951	2.74727	3.28e-07	4.69e-05
ENSG00000148702	3026	HABP2	10	10q25.3	hyaluronan binding protein 2	3657	2.74097	0.000121688	0.00260669
ENSG00000198759	25975	EGFL6	X	Xp22	EGF-like-domain, multiple 6	2607	2.7372	4.71e-07	5.7e-05
ENSG00000151790	6999	TDO2	4	4q31-q32	tryptophan 2,3-dioxygenase	5264	2.73343	0.00123175	0.0128607
ENSG00000151892	2674	GFRA1	10	10q26.11	GDNF family receptor alpha 1	9678	2.73273	6.39e-06	0.000316517
ENSG00000184937	7490	WT1	11	11p13	Wilms tumor 1	4113	2.73241	0.000522767	0.0070424
ENSG00000166426	1381	CRABP1	15	15q24	cellular retinoic acid binding protein 1	993	2.72812	0.00730993	0.0462457
ENSG00000186810	2833	CXCR3	X	Xq13	chemokine (C-X-C motif) receptor 3	1868	2.72293	0.000222243	0.00396934
ENSG00000129244	482	ATP1B2	17	17p13.1	ATPase, Na+/K+ transporting, beta 2 polypeptide	3276	2.71634	0.000209509	0.00380848
ENSG00000105509	3036	HAS1	19	19q13.4	hyaluronan synthase 1	2241	2.71633	0.00224669	0.019878
ENSG00000165078	57094	CPA6	8	8q13.2	carboxypeptidase A6	2395	2.7085	6.82e-05	0.00168025
ENSG00000166922	6447	SCG5	15	15q13-q14	secretogranin V	2196	2.70135	8.18e-08	2.45e-05
ENSG00000145861	114898	C1QTNF2	5	5q33.3	C1q and tumor necrosis factor related protein 2	2414	2.69902	2.71e-08	1.49e-05
ENSG00000144857	91653	BOC	3	3q13.2	BOC cell adhesion associated, oncogene regulated	10330	2.69188	7.72e-07	7.91e-05
ENSG00000065618	1308	COL17A1	10	10q24.3	collagen, type XVII, alpha 1	6426	2.68013	1.34e-05	0.000544876
ENSG00000128218	29802	VPREB3	22	22q11.23|22q11	pre-B lymphocyte 3	610	2.67334	3.48e-05	0.00104918
ENSG00000157766	176	ACAN	15	15q26.1	aggrecan	10908	2.66202	0.000917877	0.0104386
ENSG00000186891	8784	TNFRSF18	1	1p36.3	tumor necrosis factor receptor superfamily member 18	1370	2.65685	2.39e-06	0.000165584
ENSG00000163520	2199	FBLN2	3	3p25.1	fibulin 2	4812	2.65526	2.15e-07	3.8e-05
ENSG00000114200	590	BCHE	3	3q26.1-q26.2	butyrylcholinesterase	3082	2.64767	1.72e-07	3.31e-05
ENSG00000149633	85449	KIAA1755	20	20q11.23	KIAA1755	8083	2.64398	3.91e-07	5.15e-05
ENSG00000178031	92949	ADAMTSL1	9	9p21.3	ADAMTS like 1	13172	2.6421	8.48e-06	0.000396864
ENSG00000134986	9315	NREP	5	5q22.1	neuronal regeneration related protein	9337	2.63146	8.49e-09	6.71e-06
ENSG00000049323	4052	LTBP1	2	2p22-p21	latent transforming growth factor beta binding protein 1	7329	2.61214	1.18e-07	2.69e-05
ENSG00000196666	399888	FAM180B	11	11p11.2	family with sequence similarity 180 member B	1388	2.60351	0.000555669	0.00740396
ENSG00000135472	23017	FAIM2	12	12q13	Fas apoptotic inhibitory molecule 2	6057	2.60082	4.44e-05	0.00124778
ENSG00000138271	53836	GPR87	3	3q24	G protein-coupled receptor 87	1698	2.59753	0.00194709	0.0180106
ENSG00000148948	57689	LRRC4C	11	11p12	leucine rich repeat containing 4C	5356	2.59718	1.03e-06	9.5e-05
ENSG00000117322	1380	CR2	1	1q32	complement component (3d/Epstein Barr virus) receptor 2	4885	2.59526	0.00805709	0.0494809
ENSG00000163032	7447	VSNL1	2	2p24.3	visinin like 1	3833	2.58215	8.14e-08	2.45e-05
ENSG00000164946	158326	FREM1	9	9p22.3	FRAS1 related extracellular matrix 1	10762	2.57713	9.49e-06	0.000421938
ENSG00000165731	5979	RET	10	10q11.2	ret proto-oncogene	6661	2.5638	9.81e-08	2.53e-05
ENSG00000163145	114905	C1QTNF7	4	4p15.3	C1q and tumor necrosis factor related protein 7	5583	2.55937	5.31e-06	0.000287564
ENSG00000144057	84620	ST6GAL2	2	2q12.3	ST6 beta-galactosamide alpha-2,6-sialyltranferase 2	7708	2.55615	0.000664567	0.00840471
ENSG00000131620	55107	ANO1	11	11q13.3	anoctamin 1, calcium activated chloride channel	6021	2.55417	1.09e-06	9.82e-05
ENSG00000137809	22801	ITGA11	15	15q23	integrin subunit alpha 11	10864	2.5518	3.12e-05	0.000969455
ENSG00000114948	8745	ADAM23	2	2q33	ADAM metallopeptidase domain 23	6421	2.54993	1.25e-05	0.000516807
ENSG00000074047	2736	GLI2	2	2q14	GLI family zinc finger 2	7406	2.54239	1.1e-07	2.61e-05
ENSG00000118402	6785	ELOVL4	6	6q14	ELOVL fatty acid elongase 4	3042	2.53889	5.34e-07	6.07e-05
ENSG00000137285	347733	TUBB2B	6	6p25	tubulin beta 2B class IIb	2194	2.53425	4.69e-07	5.7e-05
ENSG00000188536	3040	HBA2	16	16p13.3	hemoglobin subunit alpha 2	856	2.53286	0.00350596	0.0273178
ENSG00000205076	3963	LGALS7	19	19q13.2	lectin, galactoside-binding, soluble, 7	795	2.52943	0.000479986	0.00665981
ENSG00000110076	9379	NRXN2	11	11q13	neurexin 2	10580	2.529	4.34e-06	0.000248374
ENSG00000151789	79750	ZNF385D	3	3p24.3	zinc finger protein 385D	13621	2.52752	4.2e-05	0.00119893
ENSG00000120820	83468	GLT8D2	12	12q	glycosyltransferase 8 domain containing 2	3271	2.52699	3.67e-08	1.64e-05
ENSG00000017427	3479	IGF1	12	12q23.2	insulin like growth factor 1	8087	2.52643	7.59e-07	7.87e-05
ENSG00000160963	136227	COL26A1	7	7q22.1	collagen, type XXVI, alpha 1	3156	2.51971	1.31e-05	0.000534736
ENSG00000181847	201633	TIGIT	3	3q13.31	T-cell immunoreceptor with Ig and ITIM domains	6091	2.51904	3.82e-05	0.00112004
ENSG00000143341	83872	HMCN1	1	1q25.3-q31.1	hemicentin 1	18579	2.50782	1.61e-05	0.000623181
ENSG00000163751	1359	CPA3	3	3q24	carboxypeptidase A3	1848	2.50755	5.17e-07	5.94e-05
ENSG00000149968	4314	MMP3	11	11q22.3	matrix metallopeptidase 3	2048	2.50237	0.000996103	0.010962
ENSG00000137033	90865	IL33	9	9p24.1	interleukin 33	3253	2.50029	4.36e-06	0.000248374
ENSG00000113578	2246	FGF1	5	5q31	fibroblast growth factor 1 (acidic)	5275	2.49805	7.4e-08	2.45e-05
ENSG00000172673	387357	THEMIS	6	6q22.33	thymocyte selection associated	4309	2.49764	0.000229605	0.00407001
ENSG00000179388	1960	EGR3	8	8p23-p21	early growth response 3	4855	2.49535	0.000482659	0.00668576
ENSG00000169676	1816	DRD5	4	4p16.1	dopamine receptor D5	2330	2.49466	6.08e-05	0.00156098
ENSG00000110777	5450	POU2AF1	11	11q23.1	POU class 2 associating factor 1	7416	2.49197	2.13e-05	0.000765654
ENSG00000115641	2274	FHL2	2	2q12.2	four and a half LIM domains 2	6626	2.49035	4.08e-07	5.22e-05
ENSG00000169245	3627	CXCL10	4	4q21	chemokine (C-X-C motif) ligand 10	1176	2.48415	0.00472917	0.0336495
ENSG00000171408	27115	PDE7B	6	6q23-q24	phosphodiesterase 7B	5946	2.48239	1.36e-06	0.000114362
ENSG00000180828	27319	BHLHE22	8	8q13	basic helix-loop-helix family member e22	3262	2.47978	3.18e-07	4.69e-05
ENSG00000146013	2676	GFRA3	5	5q31.1-q31.3	GDNF family receptor alpha 3	2039	2.47908	2.99e-06	0.000194626
ENSG00000149256	26011	TENM4	11	11q14.1	teneurin transmembrane protein 4	16332	2.47569	1.07e-06	9.73e-05
ENSG00000178401	79962	DNAJC22	12	12q13.12	DnaJ heat shock protein family (Hsp40) member C22	5006	2.47234	1.72e-07	3.31e-05
ENSG00000197506	64078	SLC28A3	9	9q22.2	solute carrier family 28 (concentrative nucleoside transporter), member 3	5063	2.46827	6.13e-06	0.000308596
ENSG00000168542	1281	COL3A1	2	2q31	collagen, type III, alpha 1	6811	2.46376	4.69e-05	0.00129657
ENSG00000168079	286133	SCARA5	8	8p21.1	scavenger receptor class A member 5	4435	2.46347	2.69e-05	0.000871475
ENSG00000117090	6504	SLAMF1	1	1q23.3	signaling lymphocytic activation molecule family member 1	4269	2.45818	4.29e-05	0.0012182
ENSG00000128591	2318	FLNC	7	7q32-q35	filamin C	9280	2.45518	2.75e-05	0.00088612
ENSG00000184697	9074	CLDN6	16	16p13.3	claudin 6	1739	2.45418	0.000554149	0.00739104
ENSG00000123243	80760	ITIH5	10	10p14	inter-alpha-trypsin inhibitor heavy chain family member 5	14628	2.45311	1.95e-07	3.6e-05
ENSG00000153993	223117	SEMA3D	7	7q21.11	sema domain, immunoglobulin domain (Ig), short basic domain, secreted, (semaphorin) 3D	8062	2.45213	0.000204886	0.00376447
ENSG00000113657	1809	DPYSL3	5	5q32	dihydropyrimidinase like 3	7164	2.44649	1.95e-07	3.6e-05
ENSG00000128602	6608	SMO	7	7q32.3	smoothened, frizzled class receptor	4311	2.44359	3.16e-07	4.69e-05
ENSG00000110448	921	CD5	11	11q13	CD5 molecule	3221	2.44251	6.37e-05	0.00161305
ENSG00000135914	3357	HTR2B	2	2q36.3-q37.1	5-hydroxytryptamine (serotonin) receptor 2B, G protein-coupled	2246	2.44183	8.22e-08	2.45e-05
ENSG00000127074	6003	RGS13	1	1q31.2	regulator of G-protein signaling 13	5923	2.43818	1.13e-07	2.63e-05
ENSG00000167178	57611	ISLR2	15	15q24.1	immunoglobulin superfamily containing leucine-rich repeat 2	6101	2.43755	0.000131894	0.00275797
ENSG00000138316	140766	ADAMTS14	10	10q21	ADAM metallopeptidase with thrombospondin type 1 motif 14	5269	2.43352	0.00167476	0.0161593
ENSG00000091482	23676	SMPX	X	Xp22.1	small muscle protein, X-linked	1040	2.43068	6.82e-05	0.00168025
ENSG00000169604	84168	ANTXR1	2	2p13.1	anthrax toxin receptor 1	8185	2.42807	2.47e-07	4e-05
ENSG00000168824	27065	NSG1	4	4p16.3	neuron specific gene family member 1	4355	2.42511	2.93e-06	0.000192652
ENSG00000168077	51435	SCARA3	8	8p21	scavenger receptor class A member 3	4031	2.42168	2.85e-07	4.41e-05
ENSG00000124343	7499	XG	X	Xp22.33	Xg blood group	2774	2.40186	2.62e-05	0.000861674
ENSG00000136011	55576	STAB2	12	12q23.3	stabilin 2	9288	2.39603	6e-06	0.000306833
ENSG00000165646	6571	SLC18A2	10	10q25	solute carrier family 18 (vesicular monoamine transporter), member 2	4125	2.39509	2.48e-05	0.000831506
ENSG00000163606	131450	CD200R1	3	3q13.2	CD200 receptor 1	3905	2.39229	2.23e-05	0.000788887
ENSG00000107165	7306	TYRP1	9	9p23	tyrosinase-related protein 1	3741	2.39227	1.06e-06	9.66e-05
ENSG00000087237	1071	CETP	16	16q21	cholesteryl ester transfer protein, plasma	2085	2.39081	2.85e-07	4.41e-05
ENSG00000175928	57633	LRRN1	3	3p26.2	leucine rich repeat neuronal 1	4264	2.38801	3.58e-07	5.04e-05
ENSG00000000971	3075	CFH	1	1q32	complement factor H	8145	2.38248	1.11e-07	2.61e-05
ENSG00000139926	122786	FRMD6	14	14q22.1	FERM domain containing 6	9416	2.37792	2.09e-07	3.74e-05
ENSG00000154864	63895	PIEZO2	18	18p11.22	piezo-type mechanosensitive ion channel component 2	14796	2.37453	2.93e-05	0.000931814
ENSG00000166482	4239	MFAP4	17	17p11.2	microfibrillar associated protein 4	2152	2.37401	0.000424841	0.00616609
ENSG00000169783	84894	LINGO1	15	15q24.3	leucine rich repeat and Ig domain containing 1	4902	2.36296	9.22e-07	8.84e-05
ENSG00000196711	389658	FAM150A	8	8q11.23	family with sequence similarity 150 member A	1217	2.36122	5.68e-07	6.39e-05
ENSG00000049768	50943	FOXP3	X	Xp11.23	forkhead box P3	2647	2.35622	0.000935354	0.0105481
ENSG00000131435	8572	PDLIM4	5	5q31.1	PDZ and LIM domain 4	3192	2.35429	3.48e-06	0.000216242
ENSG00000186340	7058	THBS2	6	6q27	thrombospondin 2	6397	2.3509	0.000136075	0.00281606
ENSG00000100079	3957	LGALS2	22	22q13.1	lectin, galactoside-binding, soluble, 2	828	2.35072	0.000696508	0.00866128
ENSG00000197353	137797	LYPD2	8	8q24.3	LY6/PLAUR domain containing 2	594	2.34852	0.000263543	0.00446361
ENSG00000180875	64388	GREM2	1	1q43	gremlin 2, DAN family BMP antagonist	4170	2.34544	1.47e-05	0.000583358
ENSG00000168398	624	BDKRB2	14	14q32.1-q32.2	bradykinin receptor B2	6845	2.344	1.17e-05	0.000490605
ENSG00000162998	2487	FRZB	2	2q32.1	frizzled-related protein	3162	2.34273	7.84e-07	7.91e-05
ENSG00000197977	54898	ELOVL2	6	6p24.2	ELOVL fatty acid elongase 2	3997	2.3417	5.67e-06	0.000296109
ENSG00000197614	8076	MFAP5	12	12p13.31	microfibrillar associated protein 5	3876	2.34102	0.000293833	0.00474907
ENSG00000182463	128553	TSHZ2	20	20q13.2	teashirt zinc finger homeobox 2	12581	2.33715	4.98e-06	0.000276619
ENSG00000104332	6422	SFRP1	8	8p11.21	secreted frizzled-related protein 1	4761	2.33258	0.000231923	0.00407123
ENSG00000100721	8115	TCL1A	14	14q32.1	T-cell leukemia/lymphoma 1A	2236	2.32768	0.00329715	0.026236
ENSG00000171551	9427	ECEL1	2	2q37.1	endothelin converting enzyme-like 1	2972	2.32589	4.15e-05	0.00118582
ENSG00000166676	780776	TVP23A	16	16p13.13	trans-golgi network vesicle protein 23 homolog A (S. cerevisiae)	5281	2.32565	2.2e-08	1.41e-05
ENSG00000079931	26002	MOXD1	6	6q23.2	monooxygenase, DBH-like 1	5293	2.321	2.17e-06	0.000153324
ENSG00000182752	5069	PAPPA	9	9q33.2	pregnancy-associated plasma protein A, pappalysin 1	11573	2.31722	5.05e-06	0.000279269
ENSG00000168386	11259	FILIP1L	3	3q12.1	filamin A interacting protein 1-like	5903	2.3111	5.32e-05	0.0014393
ENSG00000123560	5354	PLP1	X	Xq22	proteolipid protein 1	6078	2.30997	6.71e-05	0.00166849
ENSG00000169851	5099	PCDH7	4	4p15	protocadherin 7	12249	2.30972	6.38e-05	0.00161394
ENSG00000269404	6689	SPIB	19	19q13.3-q13.4	Spi-B transcription factor (Spi-1/PU.1 related)	4281	2.30788	0.000466446	0.00656004
ENSG00000139289	22822	PHLDA1	12	12q15	pleckstrin homology-like domain, family A, member 1	8069	2.30174	9.53e-08	2.53e-05
ENSG00000053702	83714	NRIP2	12	12p13.33	nuclear receptor interacting protein 2	2803	2.30039	0.000194954	0.00363165
ENSG00000147138	84636	GPR174	X	Xq21.1	G protein-coupled receptor 174	1258	2.29937	9.81e-05	0.00220607
ENSG00000085563	5243	ABCB1	7	7q21.12	ATP binding cassette subfamily B member 1	5806	2.29647	3.74e-05	0.00110734
ENSG00000113296	7060	THBS4	5	5q13	thrombospondin 4	4605	2.29596	1.03e-05	0.000443223
ENSG00000171724	57687	VAT1L	16	16q23.1	vesicle amine transport 1-like	4137	2.29566	0.000479904	0.00665981
ENSG00000167157	51450	PRRX2	9	9q34.1	paired related homeobox 2	1311	2.29464	0.000158358	0.00313795
ENSG00000128422	3872	KRT17	17	17q21.2	keratin 17, type I	2537	2.29374	0.00214709	0.0192893
ENSG00000146250	167681	PRSS35	6	6q14.2	protease, serine 35	2440	2.29217	1.02e-05	0.000443223
ENSG00000026751	57823	SLAMF7	1	1q23.1-q24.1	SLAM family member 7	4833	2.29172	4.74e-05	0.00130567
ENSG00000105880	1749	DLX5	7	7q22	distal-less homeobox 5	1895	2.27761	4.71e-07	5.7e-05
ENSG00000171502	255631	COL24A1	1	1p22.3	collagen, type XXIV, alpha 1	9568	2.27696	0.00176893	0.016898
ENSG00000149380	283208	P4HA3	11	11q13.4	prolyl 4-hydroxylase, alpha polypeptide III	4009	2.27612	2.02e-05	0.000740524
ENSG00000189320	389558	FAM180A	7	7q33	family with sequence similarity 180 member A	2526	2.275	2.04e-05	0.000747636
ENSG00000020181	25960	ADGRA2	8	8p11.23	adhesion G protein-coupled receptor A2	7061	2.26736	1.69e-06	0.000131035
ENSG00000137077	6366	CCL21	9	9p13	chemokine (C-C motif) ligand 21	924	2.26717	5.21e-06	0.000283513
ENSG00000104435	11075	STMN2	8	8q21.13	stathmin 2	2362	2.26693	2.26e-05	0.000792376
ENSG00000015413	1800	DPEP1	16	16q24.3	dipeptidase 1 (renal)	2737	2.26254	6.29e-07	6.82e-05
ENSG00000003096	90293	KLHL13	X	Xq23-q24	kelch like family member 13	6983	2.25707	1.62e-05	0.000626011
ENSG00000101230	140862	ISM1	20	20p12.1	isthmin 1, angiogenesis inhibitor	2593	2.25393	2.12e-05	0.000763689
ENSG00000186827	7293	TNFRSF4	1	1p36	tumor necrosis factor receptor superfamily member 4	1721	2.25127	4.89e-05	0.00134055
ENSG00000100448	1511	CTSG	14	14q11.2	cathepsin G	1374	2.24835	0.00146323	0.0146388
ENSG00000160185	53347	UBASH3A	21	21q22.3	ubiquitin associated and SH3 domain containing A	3915	2.24744	0.000218215	0.00391668
ENSG00000102109	27344	PCSK1N	X	Xp11.23	proprotein convertase subtilisin/kexin type 1 inhibitor	1363	2.24588	2.44e-05	0.000824826
ENSG00000102970	6361	CCL17	16	16q13	chemokine (C-C motif) ligand 17	620	2.24517	7.31e-06	0.00035717
ENSG00000152672	165530	CLEC4F	2	2p13.3	C-type lectin domain family 4 member F	2475	2.24512	0.000164695	0.00323395
ENSG00000148357	256158	HMCN2	9	9q34.11	hemicentin 2	20363	2.23968	0.000363185	0.00558117
ENSG00000271503	6352	CCL5	17	17q12	chemokine (C-C motif) ligand 5	1512	2.2356	1.56e-05	0.000612328
ENSG00000153012	55203	LGI2	4	4p15.2	leucine-rich repeat LGI family member 2	6428	2.23558	5.87e-06	0.000304071
ENSG00000110492	4192	MDK	11	11p11.2	midkine (neurite growth-promoting factor 2)	2196	2.2327	9.92e-08	2.53e-05
ENSG00000197992	283420	CLEC9A	12	12p13.2	C-type lectin domain family 9 member A	2854	2.22996	6.13e-06	0.000308596
ENSG00000185652	4908	NTF3	12	12p13	neurotrophin 3	2919	2.22627	2.65e-05	0.000867385
ENSG00000169129	84632	AFAP1L2	10	10q25.3	actin filament associated protein 1 like 2	5789	2.22231	3.84e-06	0.000230047
ENSG00000075035	9671	WSCD2	12	12q23.3	WSC domain containing 2	6557	2.22139	4.16e-06	0.000240025
ENSG00000144730	54756	IL17RD	3	3p14.3	interleukin 17 receptor D	9561	2.22101	1.28e-06	0.000110582
ENSG00000186684	339761	CYP27C1	2	2q14.3	cytochrome P450 family 27 subfamily C member 1	4491	2.2187	2.55e-05	0.000844643
ENSG00000156427	8817	FGF18	5	5q34	fibroblast growth factor 18	1986	2.21755	8.34e-05	0.00193911
ENSG00000137078	27240	SIT1	9	9p13-p12	signaling threshold regulating transmembrane adaptor 1	1327	2.21258	8.45e-05	0.00195992
ENSG00000164692	1278	COL1A2	7	7q22.1	collagen, type I, alpha 2	11156	2.2107	1.98e-05	0.000732091
ENSG00000168081	5368	PNOC	8	8p21	prepronociceptin	2126	2.20533	0.000122408	0.00261793
ENSG00000149575	6327	SCN2B	11	11q23	sodium channel, voltage gated, type II beta subunit	5826	2.20321	2.03e-06	0.000151412
ENSG00000129038	4016	LOXL1	15	15q22	lysyl oxidase like 1	3637	2.20293	3.63e-07	5.04e-05
ENSG00000188389	5133	PDCD1	2	2q37.3	programmed cell death 1	2114	2.20215	1.64e-05	0.000629862
ENSG00000168329	1524	CX3CR1	3	3p21.3	chemokine (C-X3-C motif) receptor 1	3655	2.20035	9.31e-05	0.00211996
ENSG00000105696	25789	TMEM59L	19	19p12	transmembrane protein 59 like	2626	2.19674	4.47e-06	0.000253558
ENSG00000078589	27334	P2RY10	X	Xq21.1	purinergic receptor P2Y, G-protein coupled, 10	1803	2.19651	7.19e-05	0.00174205
ENSG00000269113	388630	TRABD2B	1	1p33	TraB domain containing 2B	7034	2.1956	1.04e-05	0.000445571
ENSG00000118473	84251	SGIP1	1	1p31.3	SH3-domain GRB2-like (endophilin) interacting protein 1	10477	2.19354	9.73e-05	0.0021919
ENSG00000198523	5350	PLN	6	6q22.1	phospholamban	2001	2.19273	0.00103349	0.0112944
ENSG00000182621	23236	PLCB1	20	20p12	phospholipase C beta 1	15755	2.19255	0.00011896	0.0025605
ENSG00000183807	221303	FAM162B	6	6q22.1	family with sequence similarity 162 member B	1036	2.19229	5.96e-06	0.000306456
ENSG00000131080	60401	EDA2R	X	Xq12	ectodysplasin A2 receptor	3579	2.18941	1.19e-05	0.000497766
ENSG00000163600	29851	ICOS	2	2q33	inducible T-cell co-stimulator	2645	2.18885	4.53e-05	0.00126607
ENSG00000146197	222663	SCUBE3	6	6p21.3	signal peptide, CUB domain, EGF-like 3	7356	2.18879	0.00342402	0.0269566
ENSG00000178562	940	CD28	2	2q33	CD28 molecule	4885	2.18606	2.63e-05	0.000863438
ENSG00000170367	1473	CST5	20	20p11.21	cystatin D	756	2.18533	0.000631295	0.00815649
ENSG00000187848	22953	P2RX2	12	12q24.33	purinergic receptor P2X, ligand gated ion channel, 2	1969	2.18451	0.00167154	0.0161398
ENSG00000127083	4958	OMD	9	9q22.31	osteomodulin	2449	2.18205	5.55e-05	0.00147068
ENSG00000168334	165904	XIRP1	3	3p22.2	xin actin binding repeat containing 1	6467	2.17946	0.00114959	0.0122443
ENSG00000122188	54900	LAX1	1	1q32.1	lymphocyte transmembrane adaptor 1	3198	2.17689	0.000855223	0.0099107
ENSG00000240505	23495	TNFRSF13B	17	17p11.2	tumor necrosis factor receptor superfamily member 13B	3550	2.17615	7.42e-05	0.00178534
ENSG00000087258	2775	GNAO1	16	16q13	guanine nucleotide binding protein (G protein), alpha activating activity polypeptide O	9813	2.17269	0.000388445	0.00584233
ENSG00000132185	84824	FCRLA	1	1q23.3	Fc receptor-like A	3275	2.17073	0.00115548	0.0122682
ENSG00000164920	116039	OSR2	8	8q22.2	odd-skipped related transciption factor 2	2930	2.16227	8.94e-05	0.00204537
ENSG00000181374	6357	CCL13	17	17q11.2	chemokine (C-C motif) ligand 13	851	2.16174	9.81e-06	0.00043486
ENSG00000171877	84978	FRMD5	15	15q15.3	FERM domain containing 5	6325	2.1604	8.95e-07	8.65e-05
ENSG00000136859	23452	ANGPTL2	9	9q34	angiopoietin like 2	3889	2.15956	1.26e-06	0.000109608
ENSG00000143196	1805	DPT	1	1q12-q23	dermatopontin	1786	2.15729	1.09e-05	0.0004646
ENSG00000149294	4684	NCAM1	11	11q23.1	neural cell adhesion molecule 1	12737	2.15618	2.24e-05	0.000789059
ENSG00000110900	441631	TSPAN11	12	12p11.21	tetraspanin 11	7113	2.15207	5.08e-06	0.000279519
ENSG00000172236	7177	TPSAB1	16	16p13.3	tryptase alpha/beta 1	1512	2.15127	5.16e-06	0.000283135
ENSG00000196338	54413	NLGN3	X	Xq13.1	neuroligin 3	4006	2.15122	2.44e-05	0.000824826
ENSG00000101096	4773	NFATC2	20	20q13.2	nuclear factor of activated T-cells, cytoplasmic, calcineurin-dependent 2	8286	2.14709	7.07e-06	0.000346783
ENSG00000089012	55423	SIRPG	20	20p13	signal-regulatory protein gamma	2242	2.14709	2.95e-05	0.000931814
ENSG00000171004	90161	HS6ST2	X	Xq26.2	heparan sulfate 6-O-sulfotransferase 2	4948	2.14599	7.45e-05	0.0017909
ENSG00000183918	4068	SH2D1A	X	Xq25	SH2 domain containing 1A	2990	2.14164	0.000722608	0.00882163
ENSG00000135919	5270	SERPINE2	2	2q36.1	serpin peptidase inhibitor, clade E (nexin, plasminogen activator inhibitor type 1), member 2	8891	2.14047	8.69e-06	0.000398189
ENSG00000121753	576	ADGRB2	1	1p35	adhesion G protein-coupled receptor B2	7756	2.13919	2.12e-06	0.000152767
ENSG00000111344	8437	RASAL1	12	12q23-q24	RAS protein activator like 1 (GAP1 like)	4813	2.13787	2.01e-05	0.000737841
ENSG00000164591	91977	MYOZ3	5	5q33.1	myozenin 3	6037	2.13544	5.79e-08	2.1e-05
ENSG00000188487	387755	INSC	11	11p15.2	inscuteable homolog (Drosophila)	3435	2.1332	5.31e-05	0.0014393
ENSG00000172116	926	CD8B	2	2p12	CD8b molecule	1864	2.13035	5.91e-07	6.46e-05
ENSG00000182492	633	BGN	X	Xq28	biglycan	2453	2.12991	0.000980342	0.0109017
ENSG00000173227	91683	SYT12	11	11q13.2	synaptotagmin 12	10830	2.12568	2.66e-05	0.000867385
ENSG00000177679	222183	SRRM3	7	7q11.23	serine/arginine repetitive matrix 3	6873	2.12514	2.68e-08	1.49e-05
ENSG00000127324	7103	TSPAN8	12	12q14.1-q21.1	tetraspanin 8	2519	2.12089	8.86e-05	0.00203428
ENSG00000172215	10663	CXCR6	3	3p21	chemokine (C-X-C motif) receptor 6	3769	2.11929	0.000475256	0.00662842
ENSG00000186310	4675	NAP1L3	X	Xq21.3-q22	nucleosome assembly protein 1-like 3	2639	2.11688	2.2e-06	0.000154273
ENSG00000260807	64788	LMF1	16	16p13.3	lipase maturation factor 1	3905	2.11371	4.13e-06	0.000239355
ENSG00000163106	27306	HPGDS	4	4q22.3	hematopoietic prostaglandin D synthase	2111	2.11316	3.9e-07	5.15e-05
ENSG00000101144	655	BMP7	20	20q13	bone morphogenetic protein 7	5418	2.11287	2.14e-06	0.000152767
ENSG00000165474	2706	GJB2	13	13q11-q12	gap junction protein beta 2	2427	2.11237	0.000698812	0.00867444
ENSG00000109472	1363	CPE	4	4q32.3	carboxypeptidase E	2958	2.11075	3.1e-06	0.000201437
ENSG00000188505	342897	NCCRP1	19	19q13.2	non-specific cytotoxic cell receptor protein 1 homolog (zebrafish)	1978	2.11038	0.000178077	0.00343643
ENSG00000174807	57124	CD248	11	11q13	CD248 molecule, endosialin	2558	2.10679	5.88e-06	0.000304071
ENSG00000151617	1909	EDNRA	4	4q31.22	endothelin receptor type A	4238	2.10593	1.46e-06	0.000119552
ENSG00000007933	2328	FMO3	1	1q24.3	flavin containing monooxygenase 3	3463	2.10516	1.96e-07	3.6e-05
ENSG00000148541	220965	FAM13C	10	10q21.1	family with sequence similarity 13 member C	6753	2.10462	5.97e-05	0.00154381
ENSG00000123096	8082	SSPN	12	12p11.2	sarcospan	6821	2.10349	7.97e-06	0.000379418
ENSG00000167286	915	CD3D	11	11q23	CD3d molecule, delta (CD3-TCR complex)	929	2.10308	4.22e-05	0.00120008
ENSG00000158008	2134	EXTL1	1	1p36.1	exostosin-like glycosyltransferase 1	4537	2.10255	1.16e-06	0.000103262
ENSG00000100628	51676	ASB2	14	14q31-q32	ankyrin repeat and SOCS box containing 2	5040	2.09873	7.61e-05	0.0018158
ENSG00000116824	914	CD2	1	1p13.1	CD2 molecule	1679	2.09703	7.63e-05	0.00181656
ENSG00000132561	4147	MATN2	8	8q22	matrilin 2	6933	2.09695	5.92e-07	6.46e-05
ENSG00000136960	5168	ENPP2	8	8q24.1	ectonucleotide pyrophosphatase/phosphodiesterase 2	6729	2.09506	1.01e-05	0.000439105
ENSG00000117560	356	FASLG	1	1q23	Fas ligand	1888	2.0939	0.000149333	0.00302062
ENSG00000105290	333	APLP1	19	19q13.1	amyloid beta (A4) precursor-like protein 1	3656	2.09146	1.6e-06	0.000127124
ENSG00000138795	51176	LEF1	4	4q23-q25	lymphoid enhancer-binding factor 1	5361	2.08559	6.24e-06	0.000312878
ENSG00000183395	5367	PMCH	12	12q23.2	pro-melanin concentrating hormone	766	2.08552	1.13e-05	0.000478627
ENSG00000134198	10100	TSPAN2	1	1p13.2	tetraspanin 2	3410	2.08421	2.54e-06	0.000173466
ENSG00000106976	1759	DNM1	9	9q34	dynamin 1	8851	2.08254	2.66e-05	0.000867385
ENSG00000254726	92312	MEX3A	1	1q22	mex-3 RNA binding family member A	6124	2.08199	3.26e-06	0.000208212
ENSG00000169436	169044	COL22A1	8	8q24.3	collagen, type XXII, alpha 1	7830	2.08105	0.000229693	0.00407001
ENSG00000263961	440712	C1orf186	1	1q32.1	chromosome 1 open reading frame 186	3557	2.08095	1.23e-06	0.000108391
ENSG00000124466	27076	LYPD3	19	19q13.31	LY6/PLAUR domain containing 3	2519	2.08085	3.72e-06	0.000224274
ENSG00000115461	3488	IGFBP5	2	2q35	insulin like growth factor binding protein 5	6442	2.06895	0.000334158	0.00524307
ENSG00000126353	1236	CCR7	17	17q12-q21.2	chemokine (C-C motif) receptor 7	2508	2.06863	0.00243317	0.021152
ENSG00000116132	5396	PRRX1	1	1q24	paired related homeobox 1	8246	2.06796	0.000416342	0.00608726
ENSG00000075340	119	ADD2	2	2p13.3	adducin 2	12673	2.06621	5.82e-05	0.00152732
ENSG00000061337	11178	LZTS1	8	8p22	leucine zipper, putative tumor suppressor 1	5706	2.06468	0.000270514	0.00453026
ENSG00000112175	653	BMP5	6	6p12.1	bone morphogenetic protein 5	3952	2.06242	2.44e-05	0.000824826
ENSG00000241106	3112	HLA-DOB	6	6p21.3	major histocompatibility complex, class II, DO beta	1858	2.06238	6.54e-05	0.00164117
ENSG00000182916	56849	TCEAL7	X	Xq22.1	transcription elongation factor A (SII)-like 7	1177	2.05944	1.35e-06	0.000113963
ENSG00000075213	10371	SEMA3A	7	7p12.1	sema domain, immunoglobulin domain (Ig), short basic domain, secreted, (semaphorin) 3A	9371	2.05924	4.55e-05	0.00126835
ENSG00000139626	3695	ITGB7	12	12q13.13	integrin subunit beta 7	4481	2.05874	1.01e-05	0.000439105
ENSG00000105894	5764	PTN	7	7q33	pleiotrophin	1713	2.05225	1.76e-05	0.000663222
ENSG00000129009	3671	ISLR	15	15q23-q24	immunoglobulin superfamily containing leucine-rich repeat	2671	2.05102	2.09e-05	0.000758689
ENSG00000187260	349136	WDR86	7	7q36.1	WD repeat domain 86	4044	2.05029	2.9e-05	0.000928193
ENSG00000128285	2847	MCHR1	22	22q13.2	melanin concentrating hormone receptor 1	2961	2.04931	0.00104691	0.0114132
ENSG00000198795	25925	ZNF521	18	18q11.2	zinc finger protein 521	6223	2.04627	2.1e-05	0.000758689
ENSG00000182950	161753	ODF3L1	15	15q24.2	outer dense fiber of sperm tails 3-like 1	1196	2.04471	0.000648548	0.00825654
ENSG00000102935	23090	ZNF423	16	16q12	zinc finger protein 423	8997	2.04421	7.59e-06	0.000369382
ENSG00000155961	116442	RAB39B	X	Xq28	RAB39B, member RAS oncogene family	3505	2.04404	5.06e-05	0.00138207
ENSG00000154553	27295	PDLIM3	4	4q35	PDZ and LIM domain 3	9117	2.04389	3.18e-06	0.000205102
ENSG00000179909	7710	ZNF154	19	19q13.4	zinc finger protein 154	5713	2.0429	0.00041194	0.00604673
ENSG00000105088	93145	OLFM2	19	19p13.2	olfactomedin 2	2500	2.04208	2.21e-06	0.000154273
ENSG00000164318	133584	EGFLAM	5	5p13.2-p13.1	EGF-like, fibronectin type III and laminin G domains	5724	2.03902	3.58e-06	0.000219863
ENSG00000183801	283298	OLFML1	11	11p15.4	olfactomedin like 1	3436	2.03789	3.83e-07	5.15e-05
ENSG00000077264	5063	PAK3	X	Xq23	p21 protein (Cdc42/Rac)-activated kinase 3	10312	2.03428	7.95e-06	0.000379418
ENSG00000172572	5139	PDE3A	12	12p12	phosphodiesterase 3A	8398	2.02978	0.000130254	0.00274208
ENSG00000227507	4050	LTB	6	6p21.3	lymphotoxin beta	1535	2.02925	0.000225612	0.00401883
ENSG00000170290	6588	SLN	11	11q22.3	sarcolipin	906	2.02473	0.00664944	0.0433843
ENSG00000186265	151888	BTLA	3	3q13.2	B and T lymphocyte associated	3697	2.02426	6.22e-05	0.00159479
ENSG00000140511	145864	HAPLN3	15	15q26.1	hyaluronan and proteoglycan link protein 3	3524	2.0199	1.08e-05	0.000461082
ENSG00000105472	6320	CLEC11A	19	19q13.3	C-type lectin domain family 11 member A	1469	2.01981	2.77e-06	0.000186179
ENSG00000159784	9715	FAM131B	7	7q34	family with sequence similarity 131 member B	6430	2.01931	4e-07	5.17e-05
ENSG00000122756	1271	CNTFR	9	9p13	ciliary neurotrophic factor receptor	2111	2.01802	0.000754329	0.00907831
ENSG00000112562	64094	SMOC2	6	6q27	SPARC related modular calcium binding 2	4032	2.01694	4.47e-05	0.00125092
ENSG00000105205	1178	CLC	19	19q13.1	Charcot-Leyden crystal galectin	635	2.01689	9.91e-05	0.00222125
ENSG00000170962	80310	PDGFD	11	11q22.3	platelet derived growth factor D	4266	2.01572	0.000337673	0.00528589
ENSG00000184347	6586	SLIT3	5	5q35	slit guidance ligand 3	14260	2.01525	0.000131528	0.00275593
ENSG00000184254	220	ALDH1A3	15	15q26.3	aldehyde dehydrogenase 1 family member A3	5772	2.01429	1.28e-05	0.000524282
ENSG00000174946	29909	GPR171	3	3q25.1	G protein-coupled receptor 171	1795	2.01031	0.000949386	0.0106349
ENSG00000106034	79974	CPED1	7	7q31.31	cadherin-like and PC-esterase domain containing 1	7705	2.0097	0.000138552	0.0028454
ENSG00000234224	730130	TMEM229A	7	7q31.32	transmembrane protein 229A	2108	2.00947	0.000721317	0.00882163
ENSG00000130032	79057	PRRG3	X	Xq28	proline rich Gla (G-carboxyglutamic acid) 3 (transmembrane)	6364	2.0094	0.000164408	0.00323304
ENSG00000185518	9899	SV2B	15	15q26.1	synaptic vesicle glycoprotein 2B	12454	2.00634	7.61e-07	7.87e-05
ENSG00000099958	91319	DERL3	22	22q11.23	derlin 3	3796	2.00381	0.000344004	0.00536622
ENSG00000154645	140578	CHODL	21	21q11.2	chondrolectin	3093	2.00289	1.62e-06	0.00012719
ENSG00000173198	10800	CYSLTR1	X	Xq13.2-q21.1	cysteinyl leukotriene receptor 1	5571	2.00199	4.56e-06	0.00025633
ENSG00000107317	5730	PTGDS	9	9q34.2-q34.3	prostaglandin D2 synthase	2378	2.00022	6.51e-05	0.0016366
ENSG00000152402	2977	GUCY1A2	11	11q21-q22	guanylate cyclase 1, soluble, alpha 2	16361	1.99884	0.00494898	0.0348632
ENSG00000143184	6375	XCL1	1	1q23	chemokine (C motif) ligand 1	1367	1.99812	2.38e-05	0.000820421
ENSG00000049540	2006	ELN	7	7q11.23	elastin	6542	1.99721	0.000604142	0.00790861
ENSG00000111341	4256	MGP	12	12p12.3	matrix Gla protein	2639	1.99524	4.12e-07	5.23e-05
ENSG00000177675	283316	CD163L1	12	12p13.3	CD163 molecule like 1	5690	1.99279	0.000615595	0.00799607
ENSG00000128656	1123	CHN1	2	2q31.1	chimerin 1	4971	1.99115	2.22e-06	0.000154273
ENSG00000170153	57484	RNF150	4	4q31.21	ring finger protein 150	11007	1.99062	4.85e-06	0.000271616
ENSG00000204262	1290	COL5A2	2	2q14-q32	collagen, type V, alpha 2	7156	1.9903	6.35e-05	0.00161287
ENSG00000161381	57125	PLXDC1	17	17q21.1	plexin domain containing 1	9277	1.9862	1.28e-05	0.000524282
ENSG00000175600	79783	SUGCT	7	7p14.1	succinyl-CoA:glutarate-CoA transferase	2857	1.98496	3.38e-06	0.000212129
ENSG00000260428	642658	SCX	8	8q24.3	scleraxis bHLH transcription factor	999	1.98477	1.38e-05	0.00055569
ENSG00000159640	1636	ACE	17	17q23.3	angiotensin I converting enzyme	8365	1.98379	0.000637655	0.00816016
ENSG00000134460	3559	IL2RA	10	10p15-p14	interleukin 2 receptor subunit alpha	3176	1.98029	0.000208568	0.00380608
ENSG00000160469	84446	BRSK1	19	19q13.4	BR serine/threonine kinase 1	3841	1.97734	4.43e-05	0.00124648
ENSG00000148053	4915	NTRK2	9	9q22.1	neurotrophic tyrosine kinase, receptor, type 2	20363	1.97493	0.00144423	0.0144865
ENSG00000064300	4804	NGFR	17	17q21-q22	nerve growth factor receptor	4150	1.97446	9.85e-05	0.00221265
ENSG00000018236	1272	CNTN1	12	12q11-q12	contactin 1	7492	1.97021	3.43e-06	0.000214384
ENSG00000099256	56952	PRTFDC1	10	10p12.1	phosphoribosyl transferase domain containing 1	2329	1.96997	2.38e-07	3.99e-05
ENSG00000205363	388135	C15orf59	15	15q24.1	chromosome 15 open reading frame 59	6573	1.96827	3.64e-07	5.04e-05
ENSG00000187151	253935	ANGPTL5	11	11q22.1	angiopoietin like 5	2368	1.964	0.000202205	0.00373051
ENSG00000130528	3270	HRC	19	19q13.3	histidine rich calcium binding protein	2685	1.96335	0.000482852	0.00668576
ENSG00000113263	3702	ITK	5	5q31-q32	IL2-inducible T-cell kinase	8604	1.96292	0.00128828	0.0132487
ENSG00000121895	80008	TMEM156	4	4p14	transmembrane protein 156	2562	1.95903	4.93e-05	0.00134897
ENSG00000196639	3269	HRH1	3	3p25	histamine receptor H1	5546	1.95768	4.11e-05	0.00117822
ENSG00000165323	120114	FAT3	11	11q14.3	FAT atypical cadherin 3	19280	1.95728	0.00417752	0.0308287
ENSG00000136943	1515	CTSV	9	9q22.2	cathepsin V	4700	1.9563	7.96e-05	0.00187966
ENSG00000144152	129804	FBLN7	2	2q13	fibulin 7	6578	1.95391	5.79e-07	6.42e-05
ENSG00000047457	1356	CP	3	3q23-q25	ceruloplasmin (ferroxidase)	7296	1.95295	0.000470952	0.00660266
ENSG00000104213	5157	PDGFRL	8	8p22-p21.3	platelet-derived growth factor receptor-like	2409	1.9522	3.34e-06	0.000210892
ENSG00000113319	5924	RASGRF2	5	5q13	Ras protein specific guanine nucleotide releasing factor 2	10702	1.95184	2.42e-05	0.000824261
ENSG00000124019	79843	FAM124B	2	2q36.2	family with sequence similarity 124 member B	3541	1.94905	2.34e-05	0.000813101
ENSG00000122824	170685	NUDT10	X	Xp11.23	nudix hydrolase 10	2054	1.94755	8.21e-06	0.000386705
ENSG00000164949	2669	GEM	8	8q13-q21	GTP binding protein overexpressed in skeletal muscle	2648	1.94138	0.000395209	0.00589429
ENSG00000169282	7881	KCNAB1	3	3q26.1	potassium channel, voltage gated subfamily A regulatory beta subunit 1	6852	1.93734	7.52e-05	0.0018037
ENSG00000127951	10875	FGL2	7	7q11.23	fibrinogen-like 2	4261	1.9369	0.000676036	0.00850172
ENSG00000170382	10446	LRRN2	1	1q32.1	leucine rich repeat neuronal 2	5681	1.93636	2.94e-05	0.000931814
ENSG00000171812	1296	COL8A2	1	1p34.2	collagen, type VIII, alpha 2	4670	1.93487	2.08e-06	0.000152767
ENSG00000140009	2100	ESR2	14	14q23.2	estrogen receptor 2 (ER beta)	9337	1.93084	1.45e-05	0.000577755
ENSG00000118729	845	CASQ2	1	1p13.1	calsequestrin 2	2769	1.92827	0.00243785	0.0211653
ENSG00000113361	1004	CDH6	5	5p13.3	cadherin 6, type 2, K-cadherin (fetal kidney)	12379	1.92793	0.000188757	0.00354574
ENSG00000163359	1293	COL6A3	2	2q37	collagen, type VI, alpha 3	19633	1.92619	0.000292966	0.00474076
ENSG00000126950	59353	TMEM35	X	Xq22.1	transmembrane protein 35	2571	1.92619	3.02e-05	0.000949661
ENSG00000019186	1591	CYP24A1	20	20q13	cytochrome P450 family 24 subfamily A member 1	3972	1.9256	0.00547446	0.0377451
ENSG00000125726	970	CD70	19	19p13	CD70 molecule	1532	1.92495	0.000395411	0.00589429
ENSG00000066382	744	MPPED2	11	11p13	metallophosphoesterase domain containing 2	8197	1.9245	2.74e-05	0.000883717
ENSG00000101842	340547	VSIG1	X	Xq22.3	V-set and immunoglobulin domain containing 1	3769	1.91911	0.00449446	0.0324935
ENSG00000130300	83483	PLVAP	19	19p13.2	plasmalemma vesicle associated protein	2305	1.91812	0.000394279	0.0058905
ENSG00000170624	6444	SGCD	5	5q33-q34	sarcoglycan delta	10584	1.9168	5.44e-05	0.00145419
ENSG00000153563	925	CD8A	2	2p12	CD8a molecule	3634	1.91328	2.65e-06	0.000179783
ENSG00000174500	257144	GCSAM	3	3q13.2	germinal center-associated, signaling and motility	3783	1.91152	3.66e-05	0.00108888
ENSG00000067445	7216	TRO	X	Xp11.22-p11.21	trophinin	6716	1.91143	5.38e-06	0.000287974
ENSG00000100473	1690	COCH	14	14q11.2-q13	cochlin	3621	1.90995	1.4e-05	0.000561744
ENSG00000151468	83643	CCDC3	10	10p13	coiled-coil domain containing 3	3683	1.90859	3.23e-05	0.000991406
ENSG00000124225	56937	PMEPA1	20	20q13.31-q13.33	prostate transmembrane protein, androgen induced 1	5619	1.90857	1.07e-07	2.61e-05
ENSG00000102468	3356	HTR2A	13	13q14-q21	5-hydroxytryptamine (serotonin) receptor 2A, G protein-coupled	5624	1.90766	4.01e-05	0.00116432
ENSG00000100302	23551	RASD2	22	22q13.1	RASD family member 2	3412	1.90717	6.5e-05	0.0016366
ENSG00000035720	26228	STAP1	4	4q13.2	signal transducing adaptor family member 1	1655	1.90635	6.07e-05	0.00156098
ENSG00000169855	6091	ROBO1	3	3p12	roundabout guidance receptor 1	10875	1.90539	3.1e-05	0.000965836
ENSG00000276070	9560	CCL4L2	17	17q12	chemokine (C-C motif) ligand 4-like 2	1397	1.90304	0.00278486	0.0233917
ENSG00000225968	392617	ELFN1	7	7p22.3	extracellular leucine-rich repeat and fibronectin type III domain containing 1	3845	1.90166	0.000283509	0.00465502
ENSG00000165966	29951	PDZRN4	12	12q12	PDZ domain containing ring finger 4	4586	1.90057	0.000174097	0.00338268
ENSG00000135916	81618	ITM2C	2	2q37	integral membrane protein 2C	2611	1.89916	1.55e-06	0.000125194
ENSG00000169884	7480	WNT10B	12	12q13	wingless-type MMTV integration site family member 10B	2629	1.89756	5.13e-05	0.0013964
ENSG00000198400	4914	NTRK1	1	1q21-q22	neurotrophic tyrosine kinase, receptor, type 1	4356	1.89491	2.18e-05	0.00077803
ENSG00000277117	102723996	LOC102723996	21	-	ICOS ligand	3357	1.89334	0.000174284	0.00338268
ENSG00000082175	5241	PGR	11	11q22-q23	progesterone receptor	15404	1.8919	0.000299754	0.00481608
ENSG00000163599	1493	CTLA4	2	2q33	cytotoxic T-lymphocyte-associated protein 4	2120	1.88814	0.00453613	0.0327052
ENSG00000144369	165215	FAM171B	2	2q32.1	family with sequence similarity 171 member B	5826	1.88751	0.000274343	0.00456593
ENSG00000157064	23057	NMNAT2	1	1q25	nicotinamide nucleotide adenylyltransferase 2	7165	1.88339	5.49e-05	0.00146152
ENSG00000053328	728464	METTL24	6	6q21	methyltransferase like 24	1774	1.88094	2.92e-06	0.000192652
ENSG00000206052	220164	DOK6	18	18q22.2	docking protein 6	9387	1.87904	0.00165707	0.0160231
ENSG00000235162	387882	C12orf75	12	12q23.3	chromosome 12 open reading frame 75	2693	1.8755	0.000276099	0.00457929
ENSG00000091831	2099	ESR1	6	6q25.1	estrogen receptor 1	13629	1.87471	8.51e-07	8.34e-05
ENSG00000124203	128611	ZNF831	20	20q13.32	zinc finger protein 831	9404	1.87282	0.0016465	0.0159718
ENSG00000146966	27147	DENND2A	7	7q34	DENN/MADD domain containing 2A	5148	1.87074	2.39e-05	0.000820809
ENSG00000163519	50852	TRAT1	3	3q13	T cell receptor associated transmembrane adaptor 1	2528	1.8693	0.00462994	0.0331122
ENSG00000132514	10462	CLEC10A	17	17p13.1	C-type lectin domain family 10 member A	2469	1.86878	2.17e-05	0.000775664
ENSG00000163453	3490	IGFBP7	4	4q12	insulin like growth factor binding protein 7	1930	1.86873	1.34e-07	2.86e-05
ENSG00000136999	4856	NOV	8	8q24.1	nephroblastoma overexpressed	2673	1.86769	0.00726537	0.0460723
ENSG00000218336	55714	TENM3	4	4q35.1	teneurin transmembrane protein 3	11984	1.86415	3.44e-05	0.00104192
ENSG00000124256	81030	ZBP1	20	20q13.31	Z-DNA binding protein 1	5405	1.86285	0.000230643	0.00407001
ENSG00000160097	252995	FNDC5	1	1p35.1	fibronectin type III domain containing 5	3139	1.86096	7.77e-05	0.00184707
ENSG00000136689	3557	IL1RN	2	2q14.2	interleukin 1 receptor antagonist	3256	1.86005	2.94e-05	0.000931814
ENSG00000134013	4017	LOXL2	8	8p21.3	lysyl oxidase like 2	5707	1.85935	1.52e-05	0.000597575
ENSG00000090539	8646	CHRD	3	3q27	chordin	6620	1.85909	2.08e-05	0.000758039
ENSG00000169594	646	BNC1	15	15q25.2	basonuclin 1	4797	1.85909	0.00329421	0.026236
ENSG00000174175	6403	SELP	1	1q24.2	selectin P	3490	1.85856	6.07e-06	0.000307788
ENSG00000143603	3782	KCNN3	1	1q21.3	potassium channel, calcium activated intermediate/small conductance subfamily N alpha, member 3	13598	1.85698	7.71e-06	0.000371259
ENSG00000196368	55190	NUDT11	X	Xp11.22	nudix hydrolase 11	2385	1.85675	1.03e-06	9.5e-05
ENSG00000175130	65108	MARCKSL1	1	1p35.1	MARCKS-like 1	1699	1.85461	5.62e-08	2.1e-05
ENSG00000054598	2296	FOXC1	6	6p25	forkhead box C1	3926	1.85454	0.00017913	0.00345179
ENSG00000166920	84419	C15orf48	15	15q21.1	chromosome 15 open reading frame 48	1405	1.85285	0.000407853	0.00600644
ENSG00000177363	221091	LRRN4CL	11	11q12.3	LRRN4 C-terminal like	2585	1.85065	0.000118604	0.0025605
ENSG00000159618	221188	ADGRG5	16	16q21	adhesion G protein-coupled receptor G5	5852	1.84903	8.04e-05	0.00188953
ENSG00000151917	221336	BEND6	6	6p12.1	BEN domain containing 6	5588	1.84787	3.71e-05	0.00109876
ENSG00000198732	64093	SMOC1	14	14q24.2	SPARC related modular calcium binding 1	4369	1.84436	6.7e-05	0.00166849
ENSG00000013725	923	CD6	11	11q13	CD6 molecule	5958	1.84296	0.000945006	0.0106035
ENSG00000170509	345275	HSD17B13	4	4q22.1	hydroxysteroid (17-beta) dehydrogenase 13	2397	1.84278	0.0063945	0.0423794
ENSG00000133083	9201	DCLK1	13	13q13	doublecortin like kinase 1	14375	1.84078	3.79e-05	0.00111413
ENSG00000085741	7481	WNT11	11	11q13.5	wingless-type MMTV integration site family member 11	2401	1.83802	9.43e-05	0.0021364
ENSG00000086991	50507	NOX4	11	11q14.2-q21	NADPH oxidase 4	6096	1.83701	5.42e-06	0.000287974
ENSG00000197457	50861	STMN3	20	20q13.3	stathmin 3	3032	1.83653	9.42e-07	8.9e-05
ENSG00000130176	1264	CNN1	19	19p13.2-p13.1	calponin 1, basic, smooth muscle	2887	1.83441	0.000695719	0.00866006
ENSG00000134247	5738	PTGFRN	1	1p13.1	prostaglandin F2 receptor inhibitor	6352	1.83427	4.44e-07	5.52e-05
ENSG00000137265	3662	IRF4	6	6p25.3	interferon regulatory factor 4	5898	1.83387	0.000125019	0.00266528
ENSG00000141052	93649	MYOCD	17	17p11.2	myocardin	8875	1.8335	0.00161984	0.0158226
ENSG00000006128	6863	TAC1	7	7q21-q22	tachykinin precursor 1	1888	1.83223	0.0052288	0.0364821
ENSG00000177875	387856	CCDC184	12	12q13.11	coiled-coil domain containing 184	2343	1.82731	3.96e-06	0.000234076
ENSG00000120328	56124	PCDHB12	5	5q31	protocadherin beta 12	3875	1.82515	7.62e-06	0.000369382
ENSG00000113212	56129	PCDHB7	5	5q31	protocadherin beta 7	3765	1.82494	2.83e-06	0.000188388
ENSG00000255690	9865	TRIL	7	7p14.3	TLR4 interactor with leucine-rich repeats	4935	1.82472	0.00019162	0.00357451
ENSG00000156475	5521	PPP2R2B	5	5q32	protein phosphatase 2 regulatory subunit B, beta	13206	1.82464	3.49e-06	0.000216242
ENSG00000114455	11148	HHLA2	3	3q13.13	HERV-H LTR-associating 2	3627	1.82317	0.00252878	0.0217407
ENSG00000189233	389643	NUGGC	8	8p21.1	nuclear GTPase, germinal center associated	3959	1.82178	0.000313168	0.00499543
ENSG00000111799	1303	COL12A1	6	6q12-q13	collagen, type XII, alpha 1	12481	1.82145	4.47e-05	0.00125092
ENSG00000166147	2200	FBN1	15	15q21.1	fibrillin 1	16057	1.81908	5.01e-07	5.85e-05
ENSG00000144583	57574	2021-03-04	2	2q35	membrane associated ring-CH-type finger 4	4447	1.8179	0.00135253	0.0137828
ENSG00000105419	56917	MEIS3	19	19q13.32	Meis homeobox 3	5122	1.81582	3.19e-06	0.000205102
ENSG00000171617	8507	ENC1	5	5q13	ectodermal-neural cortex 1 (with BTB domain)	5858	1.8148	8.92e-07	8.65e-05
ENSG00000005513	30812	SOX8	16	16p13.3	SRY-box 8	4432	1.81062	1.46e-05	0.000580678
ENSG00000145649	3001	GZMA	5	5q11-q12	granzyme A	894	1.80945	0.000592439	0.00777815
ENSG00000124780	89822	KCNK17	6	6p21.1	potassium channel, two pore domain subfamily K, member 17	2172	1.80928	0.00750295	0.0470239
ENSG00000065320	9423	NTN1	17	17p13.1	netrin 1	6383	1.80921	0.000474101	0.00662092
ENSG00000262179	101929726	LOC101929726	6	-	uncharacterized LOC101929726	843	1.80716	0.000560619	0.00744795
ENSG00000138028	10669	CGREF1	2	2p23.3	cell growth regulator with EF-hand domain 1	4039	1.80712	0.00312149	0.0253782
ENSG00000078269	8871	SYNJ2	6	6q25.3	synaptojanin 2	9921	1.80493	2.95e-06	0.000193298
ENSG00000162676	2672	GFI1	1	1p22	growth factor independent 1 transcription repressor	3301	1.80471	0.00178746	0.0170265
ENSG00000163531	23114	NFASC	1	1q32.1	neurofascin	21271	1.80354	0.000171622	0.00336015
ENSG00000127152	64919	BCL11B	14	14q32.2	B-cell CLL/lymphoma 11B (zinc finger protein)	7855	1.80008	0.000598576	0.00784339
ENSG00000011590	27033	ZBTB32	19	19q13.1	zinc finger and BTB domain containing 32	2770	1.79942	0.000533808	0.00716242
ENSG00000151640	10570	DPYSL4	10	10q26	dihydropyrimidinase like 4	3176	1.79494	0.000130876	0.00275086
ENSG00000135414	10220	GDF11	12	12q13.2	growth differentiation factor 11	8657	1.7948	1.06e-05	0.000455102
ENSG00000090104	5996	RGS1	1	1q31	regulator of G-protein signaling 1	4117	1.79058	0.00136597	0.0138672
ENSG00000113083	4015	LOX	5	5q23.2	lysyl oxidase	5468	1.79042	3.08e-05	0.000964261
ENSG00000205795	192668	CYS1	2	2p25.1	cystin 1	2847	1.78894	3.9e-05	0.00113842
ENSG00000019549	6591	SNAI2	8	8q11	snail family zinc finger 2	2282	1.78642	4.53e-06	0.000255839
ENSG00000143387	1513	CTSK	1	1q21	cathepsin K	1887	1.78509	2.68e-05	0.000869238
ENSG00000272398	100133941	CD24	6	6q21	CD24 molecule	3097	1.78282	1.91e-05	0.00071104
ENSG00000048052	9734	HDAC9	7	7p21.1	histone deacetylase 9	16827	1.78202	9.3e-06	0.00042004
ENSG00000130635	1289	COL5A1	9	9q34.2-q34.3	collagen, type V, alpha 1	11189	1.78104	0.00469747	0.0335124
ENSG00000185155	83881	MIXL1	1	1q42.12	Mix paired-like homeobox	2029	1.77701	5.76e-05	0.00151899
ENSG00000154736	11096	ADAMTS5	21	21q21.3	ADAM metallopeptidase with thrombospondin type 1 motif 5	9056	1.77579	0.000275286	0.00457594
ENSG00000050344	9603	NFE2L3	7	7p15.2	nuclear factor, erythroid 2 like 3	4249	1.77436	1.76e-05	0.000663222
ENSG00000105810	1021	CDK6	7	7q21-q22	cyclin-dependent kinase 6	12260	1.77387	4.41e-05	0.00124404
ENSG00000134569	4038	LRP4	11	11p11.2	LDL receptor related protein 4	8597	1.77315	0.000286182	0.00467604
ENSG00000182866	3932	LCK	1	1p34.3	LCK proto-oncogene, Src family tyrosine kinase	3339	1.77268	0.000163929	0.00323304
ENSG00000107130	23413	NCS1	9	9q34	neuronal calcium sensor 1	5289	1.77216	6.44e-06	0.000317915
ENSG00000131746	84951	TNS4	17	17q21.2	tensin 4	4847	1.77134	0.00758469	0.0473773
ENSG00000116141	4139	MARK1	1	1q41	MAP/microtubule affinity-regulating kinase 1	5417	1.771	0.000220402	0.0039417
ENSG00000178184	84552	PARD6G	18	18q23	par-6 family cell polarity regulator gamma	4224	1.77069	9.72e-07	9.07e-05
ENSG00000091879	285	ANGPT2	8	8p23.1	angiopoietin 2	6775	1.77006	0.00116793	0.0123808
ENSG00000183098	10082	GPC6	13	13q32	glypican 6	6468	1.76906	9.32e-06	0.00042004
ENSG00000132464	10117	ENAM	4	4q13.3	enamelin	6522	1.76887	5.53e-05	0.0014669
ENSG00000101447	81610	FAM83D	20	20q11.23	family with sequence similarity 83 member D	2475	1.76875	0.000146761	0.00297756
ENSG00000120324	56126	PCDHB10	5	5q31	protocadherin beta 10	3753	1.76827	3.84e-05	0.0011222
ENSG00000108947	1949	EFNB3	17	17p13.1	ephrin-B3	3222	1.76564	0.000299382	0.00481608
ENSG00000120057	6425	SFRP5	10	10q24.1	secreted frizzled-related protein 5	1836	1.76526	0.00346311	0.0271213
ENSG00000186469	54331	GNG2	14	14q21	guanine nucleotide binding protein (G protein), gamma 2	6379	1.76289	9.5e-05	0.00214805
ENSG00000196628	6925	TCF4	18	18q21.1	transcription factor 4	24564	1.7626	0.000586018	0.00772405
ENSG00000166341	8642	DCHS1	11	11p15.4	dachsous cadherin-related 1	10765	1.76194	0.00026569	0.00447739
ENSG00000163121	93082	NEURL3	2	2q11.2	neuralized E3 ubiquitin protein ligase 3	2497	1.76126	0.000794152	0.00941417
ENSG00000121690	91614	DEPDC7	11	11p13	DEP domain containing 7	3326	1.75996	1.25e-05	0.000516807
ENSG00000162706	57863	CADM3	1	1q21.2-q22	cell adhesion molecule 3	3847	1.75946	3.17e-05	0.000981782
ENSG00000111664	2784	GNB3	12	12p13	guanine nucleotide binding protein (G protein), beta polypeptide 3	3437	1.75907	0.00132542	0.0135722
ENSG00000164483	154075	SAMD3	6	6q23.1	sterile alpha motif domain containing 3	6903	1.7588	0.000444159	0.00633757
ENSG00000007312	974	CD79B	17	17q23	CD79b molecule	2080	1.75805	0.000435877	0.00626937
ENSG00000018625	477	ATP1A2	1	1q23.2	ATPase, Na+/K+ transporting, alpha 2 polypeptide	6298	1.75682	0.00241319	0.0209919
ENSG00000170801	94031	HTRA3	4	4p16.1	HtrA serine peptidase 3	3321	1.75609	0.000467944	0.00656735
ENSG00000138623	8482	SEMA7A	15	15q22.3-q23	semaphorin 7A, GPI membrane anchor (John Milton Hagen blood group)	4309	1.75343	2.94e-05	0.000931814
ENSG00000255150	493861	EID3	12	12q23.3	EP300 interacting inhibitor of differentiation 3	1464	1.75137	1.75e-05	0.000662637
ENSG00000186479	401190	RGS7BP	5	5q12.3	regulator of G-protein signaling 7 binding protein	4379	1.74991	0.00386886	0.0293409
ENSG00000128709	3235	HOXD9	2	2q31.1	homeobox D9	1870	1.74741	0.000396397	0.00590244
ENSG00000135144	1840	DTX1	12	12q24.13	deltex 1, E3 ubiquitin ligase	4387	1.74705	3.69e-05	0.00109781
ENSG00000057657	639	PRDM1	6	6q21	PR domain containing 1, with ZNF domain	6369	1.74596	0.00169373	0.0163188
ENSG00000114698	57088	PLSCR4	3	3q24	phospholipid scramblase 4	4227	1.74579	2.07e-05	0.000754882
ENSG00000155011	27123	DKK2	4	4q25	dickkopf WNT signaling pathway inhibitor 2	4319	1.74549	0.000929455	0.0104903
ENSG00000139220	8499	PPFIA2	12	12q21.31	protein tyrosine phosphatase, receptor type, f polypeptide (PTPRF), interacting protein (liprin), alpha 2	8573	1.74496	0.00220762	0.0196977
ENSG00000092969	7042	TGFB2	1	1q41	transforming growth factor beta 2	5151	1.74381	0.000189031	0.00354592
ENSG00000079257	56925	LXN	3	3q25.32	latexin	1504	1.74355	8.15e-07	8.11e-05
ENSG00000112319	2070	EYA4	6	6q23	EYA transcriptional coactivator and phosphatase 4	8968	1.74292	5.84e-05	0.0015278
ENSG00000105855	3696	ITGB8	7	7p21.1	integrin subunit beta 8	15156	1.73972	5.36e-05	0.00144057
ENSG00000106018	7434	VIPR2	7	7q36.3	vasoactive intestinal peptide receptor 2	5222	1.73947	0.000813854	0.00957308
ENSG00000162595	9077	DIRAS3	1	1p31	DIRAS family, GTP-binding RAS-like 3	1973	1.73791	5.89e-06	0.000304071
ENSG00000276600	338382	RAB7B	1	1q32	RAB7B, member RAS oncogene family	3686	1.73656	1.24e-06	0.000109246
ENSG00000132000	79883	PODNL1	19	19p13.12	podocan-like 1	4168	1.73639	2.36e-05	0.000816528
ENSG00000113758	1627	DBN1	5	5q35.3	drebrin 1	5119	1.73559	8.11e-08	2.45e-05
ENSG00000165617	51339	DACT1	14	14q23.1	dishevelled-binding antagonist of beta-catenin 1	4490	1.73549	8.91e-05	0.00204198
ENSG00000110848	969	CD69	12	12p13	CD69 molecule	2832	1.73125	0.000809295	0.00954314
ENSG00000008118	57172	CAMK1G	1	1q32.2	calcium/calmodulin-dependent protein kinase IG	2676	1.73053	0.00203025	0.0184767
ENSG00000146151	54511	HMGCLL1	6	6p12.1	3-hydroxymethyl-3-methylglutaryl-CoA lyase-like 1	4800	1.73035	7.15e-05	0.00174091
ENSG00000088320	28954	REM1	20	20q11.21	RAS (RAD and GEM)-like GTP-binding 1	1665	1.72922	0.000200865	0.00371088
ENSG00000108001	253738	EBF3	10	10q26.3	early B-cell factor 3	4623	1.72753	0.00384603	0.0292337
ENSG00000121005	83690	CRISPLD1	8	8q21.11	cysteine-rich secretory protein LCCL domain containing 1	4543	1.72663	0.00018515	0.00349977
ENSG00000019991	3082	HGF	7	7q21.1	hepatocyte growth factor (hepapoietin A; scatter factor)	8897	1.72272	0.000366979	0.00562423
ENSG00000106624	165	AEBP1	7	7p13	AE binding protein 1	4955	1.72254	0.000569966	0.00754952
ENSG00000086205	2346	FOLH1	11	11p11.2	folate hydrolase (prostate-specific membrane antigen) 1	3824	1.72185	0.000173817	0.00338268
ENSG00000137959	10964	IFI44L	1	1p31.1	interferon induced protein 44 like	10240	1.72161	0.00151028	0.0150034
ENSG00000172752	256076	COL6A5	3	3q22.1	collagen, type VI, alpha 5	9586	1.72035	0.00383468	0.029197
ENSG00000077616	10003	NAALAD2	11	11q14.3-q21	N-acetylated alpha-linked acidic dipeptidase 2	7254	1.72018	0.000375354	0.00572285
ENSG00000143318	844	CASQ1	1	1q21	calsequestrin 1	2176	1.7196	0.000322097	0.00509551
ENSG00000164308	64167	ERAP2	5	5q15	endoplasmic reticulum aminopeptidase 2	7422	1.7192	0.000241379	0.00418858
ENSG00000143867	130497	OSR1	2	2p24.1	odd-skipped related transciption factor 1	5309	1.71858	0.000379494	0.00575281
ENSG00000091972	4345	CD200	3	3q13.2	CD200 molecule	2991	1.71815	0.000424332	0.00616609
ENSG00000164171	3673	ITGA2	5	5q11.2	integrin subunit alpha 2	7910	1.71601	2.48e-05	0.000831506
ENSG00000132854	163782	KANK4	1	1p31.3	KN motif and ankyrin repeat domains 4	5980	1.71541	0.00309793	0.0252324
ENSG00000113140	6678	SPARC	5	5q31.3-q32	secreted protein, acidic, cysteine-rich (osteonectin)	4831	1.71453	8.01e-07	8.03e-05
ENSG00000124772	57699	CPNE5	6	6p21.1	copine V	6330	1.71379	0.000196178	0.0036494
ENSG00000147647	1807	DPYS	8	8q22	dihydropyrimidinase	3818	1.70567	0.000319155	0.00506088
ENSG00000182272	338707	B4GALNT4	11	11p15.5	beta-1,4-N-acetyl-galactosaminyl transferase 4	3761	1.70326	0.000297133	0.00479663
ENSG00000169224	148823	GCSAML	1	1q44	germinal center-associated, signaling and motility-like	4680	1.70186	1.44e-05	0.000576128
ENSG00000138735	8654	PDE5A	4	4q27	phosphodiesterase 5A	9775	1.70132	0.000473828	0.00662092
ENSG00000153283	10225	CD96	3	3q13.13-q13.2	CD96 molecule	5762	1.69918	0.000976128	0.010871
ENSG00000138185	953	ENTPD1	10	10q24	ectonucleoside triphosphate diphosphohydrolase 1	6975	1.69915	2.12e-06	0.000152767
ENSG00000134343	63982	ANO3	11	11p14.2	anoctamin 3	7700	1.69797	0.000941211	0.0105874
ENSG00000204065	340543	TCEAL5	X	Xq22.1	transcription elongation factor A (SII)-like 5	1168	1.6979	0.00296338	0.0244479
ENSG00000198851	916	CD3E	11	11q23	CD3e molecule, epsilon (CD3-TCR complex)	2844	1.69593	0.000455823	0.00645117
ENSG00000073282	8626	TP63	3	3q28	tumor protein p63	7454	1.69543	0.001268	0.0130903
ENSG00000118292	79630	C1orf54	1	1q21.2	chromosome 1 open reading frame 54	1351	1.69536	1.32e-06	0.000113509
ENSG00000145244	10699	CORIN	4	4p12	corin, serine peptidase	10087	1.69476	6.67e-06	0.000328314
ENSG00000155760	8324	FZD7	2	2q33	frizzled class receptor 7	3859	1.69388	2.24e-07	3.86e-05
ENSG00000102524	10673	TNFSF13B	13	13q32-q34	tumor necrosis factor superfamily member 13b	3059	1.6936	0.000435082	0.00626937
ENSG00000161544	114757	CYGB	17	17q25.1	cytoglobin	2949	1.69257	8.05e-06	0.000381865
ENSG00000105784	154661	RUNDC3B	7	7q21.12	RUN domain containing 3B	4710	1.6917	0.000911207	0.0103976
ENSG00000157404	3815	KIT	4	4q12	v-kit Hardy-Zuckerman 4 feline sarcoma viral oncogene homolog	5563	1.6907	1.28e-05	0.000524282
ENSG00000139292	8549	LGR5	12	12q22-q23	leucine-rich repeat containing G protein-coupled receptor 5	5251	1.69035	0.000228405	0.00406319
ENSG00000138758	55752	2021-09-11	4	4q21.1	septin 11	9787	1.68701	1.37e-06	0.000114475
ENSG00000131409	94030	LRRC4B	19	19q13.33	leucine rich repeat containing 4B	3121	1.68517	0.00108733	0.0117395
ENSG00000150275	65217	PCDH15	10	10q21.1	protocadherin-related 15	15357	1.68381	0.0038111	0.0291146
ENSG00000071246	22846	VASH1	14	14q24.3	vasohibin 1	6502	1.68362	0.000124819	0.00266525
ENSG00000117707	5629	PROX1	1	1q41	prospero homeobox 1	8928	1.68315	8.66e-05	0.00199928
ENSG00000187498	1282	COL4A1	13	13q34	collagen, type IV, alpha 1	8188	1.68263	0.00150179	0.0149301
ENSG00000124429	79983	POF1B	X	Xq21.2	premature ovarian failure, 1B	4029	1.68218	0.000354539	0.00547335
ENSG00000120322	56128	PCDHB8	5	5q31	protocadherin beta 8	2740	1.68206	2.45e-06	0.000168671
ENSG00000174099	253827	MSRB3	12	12q14.3	methionine sulfoxide reductase B3	5791	1.68205	8.54e-05	0.00197729
ENSG00000118922	11278	KLF12	13	13q22	Kruppel-like factor 12	11090	1.68037	0.000484692	0.00669742
ENSG00000072952	10335	MRVI1	11	11p15	murine retrovirus integration site 1 homolog	7700	1.68026	0.000837187	0.00979465
ENSG00000183347	163351	GBP6	1	1p22.2	guanylate binding protein family member 6	2987	1.67951	0.003855	0.0292688
ENSG00000172575	10125	RASGRP1	15	15q14	RAS guanyl releasing protein 1 (calcium and DAG-regulated)	6097	1.67605	0.00116205	0.0123282
ENSG00000069431	10060	ABCC9	12	12p12.1	ATP binding cassette subfamily C member 9	11421	1.67562	4.01e-05	0.00116432
ENSG00000197361	283807	FBXL22	15	15q22.31	F-box and leucine-rich repeat protein 22	3614	1.67514	0.000785868	0.00933244
ENSG00000165868	259217	HSPA12A	10	10q26.12	heat shock protein family A (Hsp70) member 12A	6754	1.67497	4.38e-05	0.00123987
ENSG00000180998	283554	GPR137C	14	14q22.1	G protein-coupled receptor 137C	6193	1.67455	0.00128272	0.0132017
ENSG00000115226	64838	FNDC4	2	2p23.3	fibronectin type III domain containing 4	1982	1.67349	1.2e-05	0.00050047
ENSG00000064655	2139	EYA2	20	20q13.1	EYA transcriptional coactivator and phosphatase 2	3618	1.67301	0.00105869	0.0115136
ENSG00000072694	2213	FCGR2B	1	1q23	Fc fragment of IgG, low affinity IIb, receptor (CD32)	6651	1.67159	3.89e-06	0.000232076
ENSG00000148468	221061	FAM171A1	10	10p13	family with sequence similarity 171 member A1	3955	1.67117	1.58e-06	0.000126027
ENSG00000089472	9843	HEPH	X	Xq11-q12	hephaestin	7113	1.67036	4.04e-05	0.00116603
ENSG00000172399	51778	MYOZ2	4	4q26-q27	myozenin 2	2597	1.66863	0.00745931	0.0469187
ENSG00000198353	3221	HOXC4	12	12q13.3	homeobox C4	2725	1.66858	2.41e-05	0.000822255
ENSG00000054179	954	ENTPD2	9	9q34	ectonucleoside triphosphate diphosphohydrolase 2	2633	1.66643	2.52e-05	0.000839967
ENSG00000174776	151790	WDR49	3	3q26.1	WD repeat domain 49	3891	1.66625	0.00260275	0.0222376
ENSG00000135318	4907	NT5E	6	6q14-q21	5'-nucleotidase, ecto (CD73)	4533	1.66452	9.3e-06	0.00042004
ENSG00000150594	150	ADRA2A	10	10q25.2	adrenoceptor alpha 2A	3745	1.66133	1.56e-05	0.000610732
ENSG00000156011	23362	PSD3	8	8p21.3	pleckstrin and Sec7 domain containing 3	15213	1.66045	1.97e-05	0.000729081
ENSG00000122877	1959	EGR2	10	10q21.1	early growth response 2	3689	1.66016	0.000472492	0.00661735
ENSG00000112139	266727	MDGA1	6	6p21	MAM domain containing glycosylphosphatidylinositol anchor 1	14187	1.65994	0.00234159	0.0205421
ENSG00000113946	10686	CLDN16	3	3q28	claudin 16	3583	1.65968	0.00611266	0.0410822
ENSG00000144619	152330	CNTN4	3	3p26.3	contactin 4	9120	1.65814	0.000108025	0.00240212
ENSG00000118946	27253	PCDH17	13	13q21.1	protocadherin 17	8326	1.65739	0.00735611	0.0464509
ENSG00000182704	25987	TSKU	11	11q13.5	tsukushi, small leucine rich proteoglycan	4131	1.65717	7.32e-07	7.68e-05
ENSG00000147889	1029	CDKN2A	9	9p21	cyclin-dependent kinase inhibitor 2A	4329	1.6563	7.13e-05	0.00173893
ENSG00000133026	4628	MYH10	17	17p13	myosin, heavy chain 10, non-muscle	9011	1.656	0.00184784	0.0173363
ENSG00000131355	84658	ADGRE3	19	19p13.1	adhesion G protein-coupled receptor E3	2837	1.65515	0.000181364	0.00347312
ENSG00000153246	22925	PLA2R1	2	2q23-q24	phospholipase A2 receptor 1	9805	1.65393	0.00015055	0.00303153
ENSG00000189184	54510	PCDH18	4	4q31	protocadherin 18	6686	1.65333	0.00011478	0.00249857
ENSG00000050628	5733	PTGER3	1	1p31.2	prostaglandin E receptor 3	9653	1.65325	0.000777733	0.00925494
ENSG00000112186	10486	CAP2	6	6p22.3	CAP, adenylate cyclase-associated protein, 2 (yeast)	3637	1.653	0.000104457	0.00232665
ENSG00000165895	143872	ARHGAP42	11	11q22.1	Rho GTPase activating protein 42	6944	1.65015	0.000328552	0.00518541
ENSG00000167771	283248	RCOR2	11	11q13.1	REST corepressor 2	2738	1.64395	0.00025511	0.00437597
ENSG00000077157	4660	PPP1R12B	1	1q32.1	protein phosphatase 1 regulatory subunit 12B	21069	1.64217	0.00029249	0.00473876
ENSG00000135426	9840	TESPA1	12	12q13.2	thymocyte expressed, positive selection associated 1	5025	1.64171	0.000281361	0.00463109
ENSG00000128045	65997	RASL11B	4	4q12	RAS-like family 11 member B	2472	1.64149	0.000111279	0.00244613
ENSG00000105270	25999	CLIP3	19	19q13.12	CAP-Gly domain containing linker protein 3	3772	1.64091	0.0025481	0.0218541
ENSG00000071991	28513	CDH19	18	18q22.1	cadherin 19, type 2	6864	1.64081	0.00141108	0.0142284
ENSG00000112210	51715	RAB23	6	6p11	RAB23, member RAS oncogene family	4926	1.64024	4.81e-05	0.00132072
ENSG00000163564	149628	PYHIN1	1	1q23.1	pyrin and HIN domain family member 1	3479	1.63983	0.00447611	0.0324503
ENSG00000167618	3904	LAIR2	19	19q13.4	leukocyte-associated immunoglobulin-like receptor 2	1078	1.63955	5.37e-05	0.00144057
ENSG00000197540	3004	GZMM	19	19p13.3	granzyme M	945	1.63879	0.000310881	0.00497077
ENSG00000174059	947	CD34	1	1q32	CD34 molecule	9219	1.63851	0.000154591	0.00308516
ENSG00000163762	116441	TM4SF18	3	3q25.1	transmembrane 4 L six family member 18	4482	1.638	0.000372859	0.00569762
ENSG00000041982	3371	TNC	9	9q33	tenascin C	9636	1.63647	0.000183602	0.00349286
ENSG00000064787	8537	BCAS1	20	20q13.2	breast carcinoma amplified sequence 1	8186	1.63425	0.000414292	0.0060719
ENSG00000122786	800	CALD1	7	7q33	caldesmon 1	9843	1.63402	0.00050705	0.00687898
ENSG00000134533	85004	RERG	12	12p12.3	RAS-like, estrogen-regulated, growth inhibitor	4157	1.63137	2.1e-05	0.000758689
ENSG00000143147	23432	GPR161	1	1q24.2	G protein-coupled receptor 161	11224	1.62779	6.32e-05	0.00161287
ENSG00000161682	284069	FAM171A2	17	17q21.31	family with sequence similarity 171 member A2	3592	1.6264	0.000386554	0.00582952
ENSG00000101333	5332	PLCB4	20	20p12	phospholipase C beta 4	6900	1.62577	0.00299649	0.024574
ENSG00000178878	81575	APOLD1	12	12p13.1	apolipoprotein L domain containing 1	7243	1.62392	0.000277673	0.00459382
ENSG00000164647	26872	STEAP1	7	7q21	six transmembrane epithelial antigen of the prostate 1	1625	1.62245	0.000863281	0.00998209
ENSG00000176490	148252	DIRAS1	19	19p13.3	DIRAS family, GTP-binding RAS-like 1	3485	1.62189	0.000117864	0.00255327
ENSG00000261115	100507421	TMEM178B	7	7q34	transmembrane protein 178B	10656	1.61502	6.58e-05	0.00164784
ENSG00000170647	83935	TMEM133	11	11q22.1	transmembrane protein 133	1953	1.6147	0.000426938	0.00618577
ENSG00000175084	1674	DES	2	2q35	desmin	2464	1.61335	0.00248717	0.021519
ENSG00000168477	7148	TNXB	6	6p21.3	tenascin XB	15623	1.61295	0.00117756	0.0124534
ENSG00000127561	9143	SYNGR3	16	16p13	synaptogyrin 3	3420	1.61236	0.000211945	0.00383035
ENSG00000163017	72	ACTG2	2	2p13.1	actin, gamma 2, smooth muscle, enteric	3811	1.61137	0.00251764	0.021662
ENSG00000137225	11131	CAPN11	6	6p12	calpain 11	3549	1.61027	7.53e-05	0.00180383
ENSG00000183496	84206	MEX3B	15	15q25.2	mex-3 RNA binding family member B	4364	1.60962	0.00050547	0.00687142
ENSG00000128342	3976	LIF	22	22q12.2	leukemia inhibitory factor	3969	1.60821	0.00676187	0.0438103
ENSG00000182871	80781	COL18A1	21	21q22.3	collagen, type XVIII, alpha 1	8525	1.60719	0.000566041	0.00751234
ENSG00000134256	9398	CD101	1	1p13	CD101 molecule	3828	1.60598	0.00324001	0.026076
ENSG00000183580	23194	FBXL7	5	5p15.1	F-box and leucine-rich repeat protein 7	4854	1.60577	7e-05	0.00171432
ENSG00000008517	9235	IL32	16	16p13.3	interleukin 32	3209	1.60415	5.91e-05	0.001537
ENSG00000100321	9145	SYNGR1	22	22q13.1	synaptogyrin 1	6953	1.60307	1.94e-05	0.000722434
ENSG00000164176	10085	EDIL3	5	5q14	EGF-like repeats and discoidin I-like domains 3	5738	1.60261	1.04e-05	0.000445881
ENSG00000090659	30835	CD209	19	19p13	CD209 molecule	4413	1.60132	0.000640202	0.00816576
ENSG00000105492	946	SIGLEC6	19	19q13.3	sialic acid binding Ig-like lectin 6	2573	1.60093	0.000487165	0.00671088
ENSG00000118971	894	CCND2	12	12p13	cyclin D2	7157	1.59969	3.53e-05	0.00106148
ENSG00000154330	5239	PGM5	9	9q13	phosphoglucomutase 5	7426	1.59855	7.87e-05	0.00186195
ENSG00000154380	55740	ENAH	1	1q42.12	enabled homolog (Drosophila)	15044	1.5943	3.43e-05	0.00104139
ENSG00000162849	55083	KIF26B	1	1q44	kinesin family member 26B	14403	1.59408	0.00622291	0.0415614
ENSG00000108852	4355	MPP2	17	17q21.31	membrane protein, palmitoylated 2	6114	1.59365	5.92e-05	0.001537
ENSG00000103647	10391	CORO2B	15	15q23	coronin, actin binding protein, 2B	3998	1.59191	0.000291987	0.00473632
ENSG00000134532	6660	SOX5	12	12p12.1	SRY-box 5	8885	1.58939	0.00115179	0.0122572
ENSG00000168280	3800	KIF5C	2	2q23.1	kinesin family member 5C	9215	1.58915	0.000772397	0.009228
ENSG00000168490	9796	PHYHIP	8	8p21.3	phytanoyl-CoA 2-hydroxylase interacting protein	4170	1.5885	0.00234777	0.0205828
ENSG00000181195	5179	PENK	8	8q23-q24	proenkephalin	3455	1.58333	6.45e-05	0.00162822
ENSG00000182557	201305	SPNS3	17	17p13.2	spinster homolog 3 (Drosophila)	2684	1.58266	0.000128171	0.00270799
ENSG00000167244	3481	IGF2	11	11p15.5	insulin like growth factor 2	6259	1.58147	0.000314647	0.00501308
ENSG00000123610	7130	TNFAIP6	2	2q23.3	TNF alpha induced protein 6	1579	1.58119	0.000912331	0.0103976
ENSG00000167371	112476	PRRT2	16	16p11.2	proline-rich transmembrane protein 2	3573	1.58013	0.00120975	0.0126939
ENSG00000138395	65061	CDK15	2	2q33.2	cyclin-dependent kinase 15	6141	1.57922	3.42e-05	0.00103825
ENSG00000084636	1307	COL16A1	1	1p35-p34	collagen, type XVI, alpha 1	9269	1.57585	0.000121583	0.00260669
ENSG00000135074	8728	ADAM19	5	5q33.3	ADAM metallopeptidase domain 19	7704	1.57573	0.00273235	0.0230371
ENSG00000172738	221468	TMEM217	6	6p21.2	transmembrane protein 217	2737	1.57454	2.75e-07	4.34e-05
ENSG00000137960	54810	GIPC2	1	1p31.1	GIPC PDZ domain containing family member 2	3973	1.57453	0.000232191	0.00407123
ENSG00000113209	26167	PCDHB5	5	5q31	protocadherin beta 5	3408	1.57234	6.29e-05	0.00160818
ENSG00000158315	54933	RHBDL2	1	1p34.3	rhomboid, veinlet-like 2 (Drosophila)	2795	1.57201	0.000109971	0.00242931
ENSG00000118849	5918	RARRES1	3	3q25.32	retinoic acid receptor responder (tazarotene induced) 1	2236	1.57164	8.83e-05	0.00203032
ENSG00000061455	93166	PRDM6	5	5q23.2	PR domain containing 6	9350	1.5713	0.000679514	0.00853747
ENSG00000100385	3560	IL2RB	22	22q13.1	interleukin 2 receptor subunit beta	4700	1.57088	0.00460957	0.0330722
ENSG00000181036	343413	FCRL6	1	1q23.2	Fc receptor-like 6	2671	1.56914	0.00590238	0.0400175
ENSG00000185269	147111	NOTUM	17	17q25.3	notum pectinacetylesterase homolog (Drosophila)	3019	1.56752	0.000700935	0.00868474
ENSG00000196526	60312	AFAP1	4	4p16	actin filament associated protein 1	10036	1.56417	1.96e-05	0.000725964
ENSG00000204381	143903	LAYN	11	11q23.1	layilin	3144	1.56387	3.27e-07	4.69e-05
ENSG00000162739	114836	SLAMF6	1	1q23.2	SLAM family member 6	2746	1.5635	0.00258517	0.0221015
ENSG00000112541	10846	PDE10A	6	6q26	phosphodiesterase 10A	12348	1.56338	0.00079139	0.00938972
ENSG00000168675	753	LDLRAD4	18	18p11.21	low density lipoprotein receptor class A domain containing 4	16759	1.56259	3.76e-05	0.0011099
ENSG00000184613	4753	NELL2	12	12q12	neural EGFL like 2	6424	1.56214	0.00298345	0.0245231
ENSG00000162733	4921	DDR2	1	1q23.3	discoidin domain receptor tyrosine kinase 2	10730	1.56174	0.000121004	0.00260032
ENSG00000179841	9495	AKAP5	14	14q23.3	A-kinase anchoring protein 5	7512	1.56172	0.000912724	0.0103976
ENSG00000135905	55619	DOCK10	2	2q36.2	dedicator of cytokinesis 10	11065	1.561	0.00347041	0.0271626
ENSG00000169169	126129	CPT1C	19	19q13.33	carnitine palmitoyltransferase 1C	5864	1.56048	0.000308938	0.00494558
ENSG00000187068	285382	C3orf70	3	3q27.2	chromosome 3 open reading frame 70	5901	1.55903	0.000246139	0.0042547
ENSG00000011465	1634	DCN	12	12q21.33	decorin	12847	1.55748	3.03e-05	0.000951921
ENSG00000166073	11245	GPR176	15	15q14-q15.1	G protein-coupled receptor 176	5128	1.55581	0.000112086	0.00245183
ENSG00000131711	4131	MAP1B	5	5q13	microtubule associated protein 1B	12630	1.55302	0.00171471	0.0164738
ENSG00000163508	8320	EOMES	3	3p24.1	eomesodermin	3656	1.55251	0.00505629	0.0354257
ENSG00000136870	7743	ZNF189	9	9q22-q31	zinc finger protein 189	3433	1.55166	0.000162541	0.00321042
ENSG00000154188	284	ANGPT1	8	8q23.1	angiopoietin 1	7128	1.54994	0.00283579	0.0236569
ENSG00000169271	8988	HSPB3	5	5q11.2	heat shock protein family B (small) member 3	784	1.54915	0.000214834	0.00386787
ENSG00000168229	5729	PTGDR	14	14q22.1	prostaglandin D2 receptor (DP)	3033	1.54879	0.00224814	0.019878
ENSG00000062038	1001	CDH3	16	16q22.1	cadherin 3, type 1, P-cadherin (placental)	6236	1.54809	0.000205864	0.00377726
ENSG00000153707	5789	PTPRD	9	9p23-p24.3	protein tyrosine phosphatase, receptor type, D	11045	1.54558	0.000768857	0.00920367
ENSG00000146674	3486	IGFBP3	7	7p12.3	insulin like growth factor binding protein 3	4571	1.54485	0.000235904	0.00410417
ENSG00000204252	3111	HLA-DOA	6	6p21.3	major histocompatibility complex, class II, DO alpha	4012	1.54351	0.000398062	0.0059139
ENSG00000049249	3604	TNFRSF9	1	1p36	tumor necrosis factor receptor superfamily member 9	6331	1.54255	0.00109759	0.0118217
ENSG00000203685	375057	C1orf95	1	1q42.12	chromosome 1 open reading frame 95	7791	1.53857	0.000128232	0.00270799
ENSG00000125945	80818	ZNF436	1	1p36	zinc finger protein 436	4392	1.53629	2.42e-05	0.000824261
ENSG00000172403	171024	SYNPO2	4	4q26	synaptopodin 2	14034	1.53592	0.000375388	0.00572285
ENSG00000205213	55366	LGR4	11	11p14-p13	leucine-rich repeat containing G protein-coupled receptor 4	6340	1.53493	0.000646836	0.00824256
ENSG00000150672	1740	DLG2	11	11q14.1	discs, large homolog 2 (Drosophila)	16089	1.53472	0.000157639	0.00313202
ENSG00000111728	6489	ST8SIA1	12	12p12.1-p11.2	ST8 alpha-N-acetyl-neuraminide alpha-2,8-sialyltransferase 1	14483	1.5343	0.000146452	0.00297636
ENSG00000196664	51284	TLR7	X	Xp22.3	toll-like receptor 7	5209	1.53372	0.000367244	0.00562423
ENSG00000144810	1295	COL8A1	3	3q12.3	collagen, type VIII, alpha 1	9408	1.53336	9.18e-05	0.00209582
ENSG00000153162	654	BMP6	6	6p24-p23	bone morphogenetic protein 6	2780	1.5328	0.000713155	0.00876339
ENSG00000156265	56911	MAP3K7CL	21	21q22.3	MAP3K7 C-terminal like	4497	1.53252	0.000184229	0.00349577
ENSG00000135253	375616	KCP	7	7q32.1	kielin/chordin-like protein	8259	1.53184	0.000177061	0.00342668
ENSG00000196562	55959	SULF2	20	20q13.12	sulfatase 2	6657	1.53046	0.000132227	0.00275797
ENSG00000166813	374654	KIF7	15	15q26.1	kinesin family member 7	5001	1.53021	0.000151192	0.0030399
ENSG00000153233	5801	PTPRR	12	12q15	protein tyrosine phosphatase, receptor type, R	5142	1.52872	0.000206449	0.00378283
ENSG00000133067	59352	LGR6	1	1q32.1	leucine-rich repeat containing G protein-coupled receptor 6	4583	1.52701	0.00409699	0.0304183
ENSG00000182168	8633	UNC5C	4	4q21-q23	unc-5 netrin receptor C	10685	1.52642	0.000190107	0.00355617
ENSG00000189409	8510	MMP23B	1	1p36.3	matrix metallopeptidase 23B	2714	1.52376	0.000135279	0.00280392
ENSG00000120162	79817	MOB3B	9	9p21.2	MOB kinase activator 3B	7087	1.52289	5.22e-05	0.0014196
ENSG00000128596	64753	CCDC136	7	7q33	coiled-coil domain containing 136	6188	1.52112	0.000153847	0.00307487
ENSG00000124212	5740	PTGIS	20	20q13.13	prostaglandin I2 (prostacyclin) synthase	5579	1.52065	0.000265157	0.00447739
ENSG00000120645	440073	IQSEC3	12	12p13.33	IQ motif and Sec7 domain 3	7686	1.52053	0.00219259	0.0196112
ENSG00000186998	129080	EMID1	22	22q12.2	EMI domain containing 1	4899	1.52018	3.17e-05	0.000981782
ENSG00000167077	150365	MEI1	22	22q13.2	meiotic double-stranded break formation protein 1	5393	1.51858	0.000661916	0.00838654
ENSG00000102445	80183	KIAA0226L	13	13q14.13	KIAA0226-like	6105	1.51854	0.000376813	0.00572509
ENSG00000075884	55843	ARHGAP15	2	2q22.2-q22.3	Rho GTPase activating protein 15	7743	1.51818	0.000243466	0.00421935
ENSG00000084731	3797	KIF3C	2	2p23	kinesin family member 3C	6403	1.51817	1.49e-05	0.000587209
ENSG00000162636	284611	FAM102B	1	1p13.3	family with sequence similarity 102 member B	9355	1.51713	0.00069974	0.00867794
ENSG00000110811	10536	P3H3	12	12p13.31	prolyl 3-hydroxylase 3	4601	1.5166	4.05e-05	0.00116743
ENSG00000110092	595	CCND1	11	11q13	cyclin D1	4830	1.51641	0.000118396	0.0025605
ENSG00000147180	7552	ZNF711	X	Xq21.1	zinc finger protein 711	5004	1.51585	0.00353955	0.0275274
ENSG00000197380	147906	DACT3	19	19q13.32	dishevelled-binding antagonist of beta-catenin 3	5361	1.51498	0.000259271	0.00441853
ENSG00000154917	51560	RAB6B	3	3q22.1	RAB6B, member RAS oncogene family	6005	1.51434	1.28e-05	0.000524282
ENSG00000198794	192683	SCAMP5	15	15q24.2	secretory carrier membrane protein 5	4873	1.51409	6.02e-05	0.00155178
ENSG00000142875	5567	PRKACB	1	1p31.1	protein kinase, cAMP-dependent, beta catalytic subunit	6730	1.51393	0.000127519	0.0027057
ENSG00000169047	3667	IRS1	2	2q36	insulin receptor substrate 1	9953	1.51296	0.000442571	0.0063286
ENSG00000133466	114904	C1QTNF6	22	22q13.1	C1q and tumor necrosis factor related protein 6	7143	1.51259	8.05e-05	0.00188953
ENSG00000186642	5138	PDE2A	11	11q13.4	phosphodiesterase 2A	7182	1.51223	6.75e-05	0.00167158
ENSG00000075618	6624	FSCN1	7	7p22	fascin actin-bundling protein 1	3692	1.51196	8.81e-05	0.00202852
ENSG00000198780	26049	FAM169A	5	5q13.3	family with sequence similarity 169 member A	6860	1.51052	0.00127185	0.01312
ENSG00000114251	7474	WNT5A	3	3p21-p14	wingless-type MMTV integration site family member 5A	7531	1.50923	0.00025473	0.00437504
ENSG00000113721	5159	PDGFRB	5	5q33.1	platelet-derived growth factor receptor, beta polypeptide	7137	1.5091	0.000422373	0.00614614
ENSG00000189056	5649	RELN	7	7q22	reelin	12642	1.50754	0.00014928	0.00302062
ENSG00000157214	261729	STEAP2	7	7q21.13	STEAP2 metalloreductase	8715	1.50682	0.00156983	0.0154126
ENSG00000076344	8786	RGS11	16	16p13.3	regulator of G-protein signaling 11	4798	1.50333	0.00172233	0.0165233
ENSG00000254535	132430	PABPC4L	4	4q28.3	poly(A) binding protein, cytoplasmic 4-like	4944	1.50302	0.000116832	0.002535
ENSG00000196196	646962	HRCT1	9	9p13.3	histidine rich carboxyl terminus 1	950	1.50301	0.00046384	0.00653023
ENSG00000112619	5961	PRPH2	6	6p21.1	peripherin 2 (retinal degeneration, slow)	2976	1.50207	6.05e-06	0.000307788
ENSG00000095752	3589	IL11	19	19q13.3-q13.4	interleukin 11	2671	1.50125	0.00684353	0.0441901
ENSG00000182218	84439	HHIPL1	14	14q32	HHIP-like 1	7836	1.50115	8.1e-06	0.000382904
ENSG00000113211	56130	PCDHB6	5	5q31	protocadherin beta 6	3266	1.50003	0.000319021	0.00506088
ENSG00000167100	201191	SAMD14	17	17q21.33	sterile alpha motif domain containing 14	7016	1.49916	0.000672128	0.00848436
ENSG00000164099	8492	PRSS12	4	4q28.1	protease, serine 12	5725	1.4983	0.000637939	0.00816016
ENSG00000107957	9644	SH3PXD2A	10	10q24.33	SH3 and PX domains 2A	11756	1.49807	8.66e-05	0.00199928
ENSG00000112559	4188	MDFI	6	6p21	MyoD family inhibitor	2523	1.49636	2.17e-05	0.000775664
ENSG00000198885	150771	ITPRIPL1	2	2q11.2	inositol 1,4,5-trisphosphate receptor interacting protein-like 1	4652	1.49595	0.000177456	0.00342936
ENSG00000147100	6567	SLC16A2	X	Xq13.2	solute carrier family 16, member 2 (thyroid hormone transporter)	4161	1.49358	2.4e-05	0.000820809
ENSG00000167992	220001	VWCE	11	11q12.2	von Willebrand factor C and EGF domains	4874	1.4918	0.000723149	0.00882163
ENSG00000150471	23284	ADGRL3	4	4q13.1	adhesion G protein-coupled receptor L3	13998	1.49151	0.0010829	0.011701
ENSG00000138448	3685	ITGAV	2	2q31-q32	integrin subunit alpha V	8211	1.49068	1.17e-05	0.000492282
ENSG00000177374	3090	HIC1	17	17p13.3	hypermethylated in cancer 1	8108	1.48866	0.000109864	0.00242931
ENSG00000141753	3487	IGFBP4	17	17q21.2	insulin like growth factor binding protein 4	2200	1.4879	3.1e-05	0.000965836
ENSG00000169946	23414	ZFPM2	8	8q23	zinc finger protein, FOG family member 2	7775	1.48751	0.000636452	0.00816016
ENSG00000138135	9023	CH25H	10	10q23	cholesterol 25-hydroxylase	1686	1.48748	0.00213506	0.0191941
ENSG00000162975	3754	KCNF1	2	2p25	potassium channel, voltage gated modifier subfamily F, member 1	2289	1.48624	0.000138329	0.0028454
ENSG00000158747	4681	NBL1	1	1p36.13	neuroblastoma 1, DAN family BMP antagonist	3465	1.48426	0.000212179	0.00383035
ENSG00000154040	26256	CABYR	18	18q11.2	calcium binding tyrosine-(Y)-phosphorylation regulated	3518	1.48315	0.000183065	0.00348759
ENSG00000163687	1776	DNASE1L3	3	3p14.3	deoxyribonuclease I-like 3	3148	1.48283	2.39e-05	0.000820809
ENSG00000100373	7380	UPK3A	22	22q13.31	uroplakin 3A	1051	1.48139	7.19e-05	0.00174205
ENSG00000185532	5592	PRKG1	10	10q11.2	protein kinase, cGMP-dependent, type I	7507	1.47939	0.000499385	0.0068163
ENSG00000172137	794	CALB2	16	16q22.2	calbindin 2	1703	1.47716	0.00300321	0.0246031
ENSG00000079150	51661	FKBP7	2	2q31.2	FK506 binding protein 7	3080	1.47681	3.99e-06	0.000235152
ENSG00000150637	10666	CD226	18	18q22.3	CD226 molecule	13638	1.47662	0.00472433	0.0336439
ENSG00000148516	6935	ZEB1	10	10p11.2	zinc finger E-box binding homeobox 1	8650	1.47609	0.00758757	0.0473773
ENSG00000106952	944	TNFSF8	9	9q33	tumor necrosis factor superfamily member 8	2906	1.476	0.0010003	0.0109763
ENSG00000065325	9340	GLP2R	17	17p13.3	glucagon-like peptide 2 receptor	6052	1.47566	0.00508952	0.0356399
ENSG00000162576	54587	MXRA8	1	1p36.33	matrix-remodelling associated 8	3622	1.47486	0.000132241	0.00275797
ENSG00000172380	55970	GNG12	1	1p31.3	guanine nucleotide binding protein (G protein), gamma 12	4724	1.47327	4.71e-05	0.00129849
ENSG00000135454	2583	B4GALNT1	12	12q13.3	beta-1,4-N-acetyl-galactosaminyl transferase 1	8003	1.47289	0.000277729	0.00459382
ENSG00000117228	2633	GBP1	1	1p22.2	guanylate binding protein 1, interferon-inducible	4992	1.47251	0.0011353	0.0121017
ENSG00000115252	5136	PDE1A	2	2q32.1	phosphodiesterase 1A	6322	1.47175	7.87e-05	0.00186195
ENSG00000014914	10903	MTMR11	1	1q21.2	myotubularin related protein 11	4591	1.47114	7e-05	0.00171432
ENSG00000173208	225	ABCD2	12	12q12	ATP binding cassette subfamily D member 2	6238	1.46949	0.000937649	0.0105651
ENSG00000174944	9934	P2RY14	3	3q24-q25.1	purinergic receptor P2Y, G-protein coupled, 14	2815	1.46676	0.000960837	0.0107363
ENSG00000182253	23336	SYNM	15	15q26.3	synemin	7819	1.46625	0.000969105	0.0108017
ENSG00000129194	6665	SOX15	17	17p13.1	SRY-box 15	1541	1.46573	0.00710623	0.045234
ENSG00000179772	2307	FOXS1	20	20q11.21	forkhead box S1	1319	1.46552	0.00441878	0.0321324
ENSG00000170390	166614	DCLK2	4	4q31.3	doublecortin like kinase 2	4606	1.46332	0.000378887	0.00575009
ENSG00000136378	11173	ADAMTS7	15	15q24.2	ADAM metallopeptidase with thrombospondin type 1 motif 7	7730	1.46296	0.00384987	0.0292464
ENSG00000132718	23208	SYT11	1	1q21.2	synaptotagmin 11	5240	1.46287	8.14e-05	0.00189826
ENSG00000173068	54796	BNC2	9	9p22.2	basonuclin 2	15323	1.46248	0.000779933	0.00927016
ENSG00000225614	84627	ZNF469	16	16q24	zinc finger protein 469	13287	1.46231	0.00126579	0.0130776
ENSG00000181234	92293	TMEM132C	12	12q24.32	transmembrane protein 132C	4947	1.46044	0.00241079	0.0209847
ENSG00000168056	4054	LTBP3	11	11q13.1	latent transforming growth factor beta binding protein 3	10543	1.45927	0.00051687	0.00698398
ENSG00000140262	6938	TCF12	15	15q21	transcription factor 12	9446	1.45909	0.00014648	0.00297636
ENSG00000164402	23176	2021-09-08	5	5q31	septin 8	7711	1.45889	3.66e-06	0.000221604
ENSG00000134874	22873	DZIP1	13	13q32.1	DAZ interacting zinc finger protein 1	8470	1.4565	0.00133294	0.0136349
ENSG00000163568	9447	AIM2	1	1q22	absent in melanoma 2	2009	1.45343	0.00471417	0.0335894
ENSG00000115414	2335	FN1	2	2q34	fibronectin 1	17315	1.45199	0.000267451	0.00448457
ENSG00000165507	11067	C10orf10	10	10q11.21	chromosome 10 open reading frame 10	2979	1.45093	0.0005971	0.00783169
ENSG00000137203	7020	TFAP2A	6	6p24	transcription factor AP-2 alpha (activating enhancer binding protein 2 alpha)	8245	1.44985	0.00215357	0.0193217
ENSG00000158715	85414	SLC45A3	1	1q32.1	solute carrier family 45 member 3	3702	1.4497	3.97e-05	0.00115711
ENSG00000118523	1490	CTGF	6	6q23.1	connective tissue growth factor	2339	1.4488	0.000298574	0.0048141
ENSG00000100298	164668	APOBEC3H	22	22q13.1	apolipoprotein B mRNA editing enzyme, catalytic polypeptide-like 3H	1251	1.44449	0.000926973	0.0104711
ENSG00000122863	9469	CHST3	10	10q22.1	carbohydrate (chondroitin 6) sulfotransferase 3	6970	1.44365	0.000814357	0.00957308
ENSG00000131873	22856	CHSY1	15	15q26.3	chondroitin sulfate synthase 1	5555	1.44224	0.000552693	0.00738629
ENSG00000137672	7225	TRPC6	11	11q22.1	transient receptor potential cation channel, subfamily C, member 6	5537	1.44189	0.00172038	0.0165163
ENSG00000154721	58494	JAM2	21	21q21.2	junctional adhesion molecule 2	5933	1.44183	0.00045973	0.00649703
ENSG00000141293	8631	SKAP1	17	17q21.32	src kinase associated phosphoprotein 1	2648	1.44065	0.000583195	0.00770195
ENSG00000077942	2192	FBLN1	22	22q13.31	fibulin 1	7285	1.44062	0.00151267	0.0150049
ENSG00000147573	84675	TRIM55	8	8q13.1	tripartite motif containing 55	3081	1.43847	0.0004502	0.00640534
ENSG00000165259	139324	HDX	X	Xq21.1	highly divergent homeobox	7258	1.43798	0.000249914	0.00430332
ENSG00000166707	644353	ZCCHC18	X	Xq22.2	zinc finger, CCHC domain containing 18	3389	1.43613	0.000690729	0.00862191
ENSG00000158292	387509	GPR153	1	1p36.31	G protein-coupled receptor 153	4082	1.4346	8.09e-05	0.00189526
ENSG00000159164	9900	SV2A	1	1q21.2	synaptic vesicle glycoprotein 2A	4824	1.43456	0.00124003	0.0129108
ENSG00000164122	140458	ASB5	4	4q34.2	ankyrin repeat and SOCS box containing 5	4064	1.43456	0.00181742	0.0171753
ENSG00000082497	56256	SERTAD4	1	1q32.1-q41	SERTA domain containing 4	5467	1.43358	0.000276169	0.00457929
ENSG00000076706	4162	MCAM	11	11q23.3	melanoma cell adhesion molecule	7422	1.43087	0.000438908	0.00629805
ENSG00000204396	80737	VWA7	6	6p21.33	von Willebrand factor A domain containing 7	3638	1.43069	0.000735494	0.00894784
ENSG00000179583	4261	CIITA	16	16p13	class II, major histocompatibility complex, transactivator	14152	1.42993	0.000675243	0.00850172
ENSG00000130508	7837	PXDN	2	2p25	peroxidasin	11257	1.42932	0.001647	0.0159718
ENSG00000099139	5125	PCSK5	9	9q21.3	proprotein convertase subtilisin/kexin type 5	12705	1.42799	9.88e-06	0.000435027
ENSG00000168421	399	RHOH	4	4p13	ras homolog family member H	6608	1.42706	0.000715053	0.00877868
ENSG00000170542	5272	SERPINB9	6	6p25	serpin peptidase inhibitor, clade B (ovalbumin), member 9	4118	1.42616	0.00319111	0.0258407
ENSG00000143185	6846	XCL2	1	1q24.2	chemokine (C motif) ligand 2	565	1.42604	0.00251211	0.0216283
ENSG00000049089	1298	COL9A2	1	1p33-p32	collagen, type IX, alpha 2	4151	1.42552	0.000654334	0.00830657
ENSG00000122224	4063	LY9	1	1q23.3	lymphocyte antigen 9	9118	1.42478	0.000843869	0.00986423
ENSG00000135549	5570	PKIB	6	6q22.31	protein kinase (cAMP-dependent, catalytic) inhibitor beta	3432	1.42399	0.00341077	0.0269154
ENSG00000249992	25907	TMEM158	3	3p21.3	transmembrane protein 158 (gene/pseudogene)	1813	1.42342	0.000271487	0.0045409
ENSG00000134901	79070	KDELC1	13	13q33	KDEL motif containing 1	2367	1.42197	4.9e-06	0.000272821
ENSG00000143851	5778	PTPN7	1	1q32.1	protein tyrosine phosphatase, non-receptor type 7	5906	1.42174	0.0020575	0.0186466
ENSG00000164484	114801	TMEM200A	6	6q23.1	transmembrane protein 200A	6137	1.42114	0.000283421	0.00465502
ENSG00000198720	124930	ANKRD13B	17	17q11.2	ankyrin repeat domain 13B	3971	1.42037	0.000659329	0.00836208
ENSG00000104490	83988	NCALD	8	8q22.2	neurocalcin delta	8042	1.41994	0.000278471	0.00460042
ENSG00000249242	441027	TMEM150C	4	4q21.22	transmembrane protein 150C	3671	1.41894	0.000498972	0.0068163
ENSG00000137501	54843	SYTL2	11	11q14	synaptotagmin like 2	11258	1.41754	0.000477097	0.0066453
ENSG00000116717	1647	GADD45A	1	1p31.2	growth arrest and DNA damage inducible alpha	2069	1.41719	0.000256486	0.00439396
ENSG00000089692	3902	LAG3	12	12p13.32	lymphocyte-activation gene 3	3056	1.4157	0.000483982	0.0066945
ENSG00000158022	84676	TRIM63	1	1p34-p33	tripartite motif containing 63, E3 ubiquitin protein ligase	2573	1.41515	0.000402843	0.00594601
ENSG00000183722	10186	LHFP	13	13q12	lipoma HMGIC fusion partner	2327	1.41217	0.000333056	0.0052319
ENSG00000122870	80114	BICC1	10	10q21.1	BicC family RNA binding protein 1	6569	1.41212	0.00137152	0.013892
ENSG00000185811	10320	IKZF1	7	7p12.2	IKAROS family zinc finger 1	9784	1.41091	0.00272941	0.0230355
ENSG00000102057	3750	KCND1	X	Xp11.23	potassium channel, voltage gated Shal related subfamily D, member 1	5807	1.40992	0.00183179	0.0172626
ENSG00000167535	784	CACNB3	12	12q13	calcium channel, voltage-dependent, beta 3 subunit	7153	1.40969	1.33e-06	0.000113935
ENSG00000163637	166336	PRICKLE2	3	3p14.1	prickle homolog 2	8726	1.40931	0.00117501	0.0124362
ENSG00000156804	114907	FBXO32	8	8q24.13	F-box protein 32	7395	1.4078	0.000466986	0.00656076
ENSG00000147168	3561	IL2RG	X	Xq13.1	interleukin 2 receptor subunit gamma	2760	1.40632	0.000722747	0.00882163
ENSG00000075223	10512	SEMA3C	7	7q21-q31	sema domain, immunoglobulin domain (Ig), short basic domain, secreted, (semaphorin) 3C	6268	1.40588	0.000414559	0.0060719
ENSG00000038427	1462	VCAN	5	5q14.3	versican	14831	1.40447	0.000739756	0.00897531
ENSG00000126785	57381	RHOJ	14	14q23.2	ras homolog family member J	3793	1.40068	5.36e-05	0.00144057
ENSG00000118777	9429	ABCG2	4	4q22	ATP binding cassette subfamily G member 2 (Junior blood group)	4848	1.39929	2.29e-05	0.000797539
ENSG00000169992	57555	NLGN2	17	17p13.1	neuroligin 2	5550	1.39845	0.00518245	0.0362152
ENSG00000155367	333926	PPM1J	1	1p13.2	protein phosphatase, Mg2+/Mn2+ dependent 1J	2874	1.39836	1.03e-05	0.000443223
ENSG00000100767	89932	PAPLN	14	14q24.2	papilin, proteoglycan-like sulfated glycoprotein	7699	1.39764	0.00177898	0.0169818
ENSG00000090382	4069	LYZ	12	12q15	lysozyme	1764	1.39716	0.000548263	0.00733438
ENSG00000100453	3002	GZMB	14	14q11.2	granzyme B	1411	1.39527	0.00360886	0.0279048
ENSG00000162738	57216	VANGL2	1	1q22-q23	VANGL planar cell polarity protein 2	5340	1.39069	0.000435976	0.00626937
ENSG00000100427	23209	MLC1	22	22q13.33	megalencephalic leukoencephalopathy with subcortical cysts 1	4297	1.39009	0.000743382	0.00899165
ENSG00000130822	139728	PNCK	X	Xq28	pregnancy up-regulated nonubiquitous CaM kinase	5091	1.38905	0.00282216	0.0235871
ENSG00000184986	80757	TMEM121	14	14q32.33	transmembrane protein 121	1904	1.38853	0.00074796	0.00902592
ENSG00000151136	121551	BTBD11	12	12q23.3	BTB (POZ) domain containing 11	7924	1.3864	0.000149783	0.00302516
ENSG00000130700	140628	GATA5	20	20q13.33	GATA binding protein 5	2595	1.38276	0.00105124	0.0114511
ENSG00000129951	79948	PLPPR3	19	19p13.3	phospholipid phosphatase related 3	2741	1.38118	0.00411837	0.0305205
ENSG00000133106	94240	EPSTI1	13	13q13.3	epithelial stromal interaction 1 (breast)	4924	1.38042	0.00323001	0.0260398
ENSG00000081277	5317	PKP1	1	1q32	plakophilin 1	6211	1.37946	0.0066509	0.0433843
ENSG00000173706	57493	HEG1	3	3q21.2	heart development protein with EGF-like domains 1	9925	1.37873	0.00290116	0.0240231
ENSG00000074181	4854	NOTCH3	19	19p13.2-p13.1	notch 3	9394	1.37869	0.00198644	0.0182467
ENSG00000163069	6443	SGCB	4	4q12	sarcoglycan beta	4541	1.37676	5.81e-05	0.00152621
ENSG00000214357	54492	NEURL1B	5	5q35.1	neuralized E3 ubiquitin protein ligase 1B	6424	1.37663	8.95e-06	0.000407421
ENSG00000070190	27071	DAPP1	4	4q25-q27	dual adaptor of phosphotyrosine and 3-phosphoinositides	4548	1.37558	0.0011202	0.0120267
ENSG00000113205	56132	PCDHB3	5	5q31	protocadherin beta 3	3355	1.37484	0.000451631	0.00641808
ENSG00000147408	55790	CSGALNACT1	8	8p21.3	chondroitin sulfate N-acetylgalactosaminyltransferase 1	6580	1.37396	0.00200738	0.0183202
ENSG00000074706	26034	IPCEF1	6	6q25.2	interaction protein for cytohesin exchange factors 1	8474	1.3733	0.0024914	0.021519
ENSG00000127863	55504	TNFRSF19	13	13q12.11-q12.3	tumor necrosis factor receptor superfamily member 19	5113	1.3719	8.28e-05	0.00192774
ENSG00000160951	5731	PTGER1	19	19p13.1	prostaglandin E receptor 1	1421	1.37142	0.00053149	0.00713844
ENSG00000151458	57182	ANKRD50	4	4q28.1	ankyrin repeat domain 50	8794	1.37075	0.000892266	0.010234
ENSG00000159200	1827	RCAN1	21	21q22.12	regulator of calcineurin 1	6990	1.37006	2.53e-05	0.000839967
ENSG00000147027	83604	TMEM47	X	Xp11.4	transmembrane protein 47	4054	1.36994	0.00180318	0.0170953
ENSG00000067840	57595	PDZD4	X	Xq28	PDZ domain containing 4	4341	1.36993	0.000716376	0.00878689
ENSG00000187720	79875	THSD4	15	15q23	thrombospondin type 1 domain containing 4	15837	1.36947	0.00189321	0.0176251
ENSG00000177272	3738	KCNA3	1	1p13.3	potassium channel, voltage gated shaker related subfamily A, member 3	2569	1.36881	0.00200784	0.0183202
ENSG00000120594	84898	PLXDC2	10	10p12.31	plexin domain containing 2	12567	1.368	0.00401499	0.030042
ENSG00000079263	11262	SP140	2	2q37.1	SP140 nuclear body protein	5582	1.36784	0.000752548	0.00906499
ENSG00000164197	285671	RNF180	5	5q12.3	ring finger protein 180	5434	1.36755	0.00195385	0.0180482
ENSG00000104783	3783	KCNN4	19	19q13.2	potassium channel, calcium activated intermediate/small conductance subfamily N alpha, member 4	3289	1.36649	0.00193365	0.0179357
ENSG00000185565	4045	LSAMP	3	3q13.31	limbic system-associated membrane protein	10330	1.36579	0.000584918	0.00771713
ENSG00000166997	245812	CNPY4	7	7q22.1	canopy FGF signaling regulator 4	2475	1.36333	2.55e-05	0.000845062
ENSG00000141161	146862	UNC45B	17	17q12	unc-45 myosin chaperone B	5679	1.36254	0.00149249	0.0148486
ENSG00000124766	6659	SOX4	6	6p22.3	SRY-box 4	5851	1.36167	7.01e-05	0.00171432
ENSG00000181350	388341	LRRC75A	17	17p11.2	leucine rich repeat containing 75A	3695	1.36081	1.6e-05	0.000623181
ENSG00000172667	64393	ZMAT3	3	3q26.32	zinc finger, matrin-type 3	9646	1.35987	4.04e-05	0.00116603
ENSG00000119326	8727	CTNNAL1	9	9q31.2	catenin alpha-like 1	3131	1.35908	0.000210688	0.003824
ENSG00000058091	5218	CDK14	7	7q21-q22	cyclin-dependent kinase 14	6841	1.3582	0.000102896	0.00229567
ENSG00000082781	3693	ITGB5	3	3q21.2	integrin subunit beta 5	6447	1.3558	4.97e-07	5.85e-05
ENSG00000112214	9457	FHL5	6	6q16.1-q16.3	four and a half LIM domains 5	2135	1.35516	0.00592713	0.0401246
ENSG00000171621	80176	SPSB1	1	1p36.22	splA/ryanodine receptor domain and SOCS box containing 1	3403	1.3548	3.22e-05	0.000991406
ENSG00000162946	27185	DISC1	1	1q42.1	disrupted in schizophrenia 1	12906	1.354	0.000397324	0.0059097
ENSG00000053438	4826	NNAT	20	20q11.2-q12	neuronatin	1297	1.35354	0.000992644	0.0109561
ENSG00000171680	57449	PLEKHG5	1	1p36.31	pleckstrin homology and RhoGEF domain containing G5	6920	1.35341	0.000352547	0.00545513
ENSG00000120875	1846	DUSP4	8	8p12-p11	dual specificity phosphatase 4	7257	1.35252	0.000425121	0.00616609
ENSG00000151067	775	CACNA1C	12	12p13.3	calcium channel, voltage-dependent, L type, alpha 1C subunit	19103	1.35157	0.00461315	0.0330802
ENSG00000167476	126306	JSRP1	19	19p13.3	junctional sarcoplasmic reticulum protein 1	1950	1.34908	0.00359413	0.0278229
ENSG00000029153	56938	ARNTL2	12	12p12.2-p11.2	aryl hydrocarbon receptor nuclear translocator like 2	6983	1.34838	0.000985708	0.0109414
ENSG00000020577	23034	SAMD4A	14	14q22.2	sterile alpha motif domain containing 4A	12170	1.34829	0.00457232	0.0328928
ENSG00000172458	53342	IL17D	13	13q11	interleukin 17D	3327	1.34614	1.43e-05	0.000574753
ENSG00000221818	64641	EBF2	8	8p21.2	early B-cell factor 2	7077	1.34598	0.00182011	0.0171791
ENSG00000120833	8835	SOCS2	12	12q	suppressor of cytokine signaling 2	6776	1.34458	5.85e-05	0.0015278
ENSG00000142920	113451	AZIN2	1	1p35.1	antizyme inhibitor 2	6559	1.34456	0.000287212	0.00468718
ENSG00000151388	81792	ADAMTS12	5	5q35	ADAM metallopeptidase with thrombospondin type 1 motif 12	9778	1.34365	0.00503131	0.0353059
ENSG00000175879	3234	HOXD8	2	2q31.1	homeobox D8	2629	1.34248	0.00269185	0.0227959
ENSG00000213694	1903	S1PR3	9	9q22.1-q22.2	sphingosine-1-phosphate receptor 3	8754	1.34185	0.000684223	0.00858058
ENSG00000163053	151473	SLC16A14	2	2q36.3	solute carrier family 16 member 14	4946	1.34106	0.00115302	0.0122572
ENSG00000136274	23148	NACAD	7	7p13	NAC alpha domain containing	4917	1.34069	0.00185556	0.017376
ENSG00000125810	22918	CD93	20	20p11.21	CD93 molecule	6708	1.34032	0.00693538	0.0445689
ENSG00000186197	128178	EDARADD	1	1q42.3	EDAR-associated death domain	3726	1.3397	0.00011895	0.0025605
ENSG00000145864	2561	GABRB2	5	5q34	gamma-aminobutyric acid (GABA) A receptor, beta 2	10002	1.33953	0.00772724	0.0480175
ENSG00000157833	150946	GAREM2	2	2p23.3	GRB2 associated regulator of MAPK1 subtype 2	5939	1.339	0.000263219	0.00446361
ENSG00000124813	860	RUNX2	6	6p21	runt-related transcription factor 2	8192	1.33897	0.000386725	0.00582952
ENSG00000172348	10231	RCAN2	6	6p12.3	regulator of calcineurin 2	3712	1.33889	0.000289208	0.00470261
ENSG00000154654	4685	NCAM2	21	21q21.1	neural cell adhesion molecule 2	8380	1.33697	0.00294666	0.0243249
ENSG00000102053	340554	ZC3H12B	X	Xq12	zinc finger CCCH-type containing 12B	7829	1.33565	0.000431761	0.00624143
ENSG00000149451	80332	ADAM33	20	20p13	ADAM metallopeptidase domain 33	5834	1.33541	0.00324295	0.026076
ENSG00000143878	388	RHOB	2	2p24	ras homolog family member B	2372	1.33487	2.67e-05	0.000867385
ENSG00000125355	55026	TMEM255A	X	Xq24	transmembrane protein 255A	3858	1.33475	0.00179865	0.0170953
ENSG00000116774	56944	OLFML3	1	1p13.2	olfactomedin like 3	2821	1.33414	0.000111054	0.0024452
ENSG00000152270	5140	PDE3B	11	11p15.1	phosphodiesterase 3B	11707	1.33303	0.00634461	0.0421854
ENSG00000105851	5294	PIK3CG	7	7q22.3	phosphatidylinositol-4,5-bisphosphate 3-kinase catalytic subunit gamma	5930	1.33224	0.0011828	0.0124891
ENSG00000103226	408050	NOMO3	16	16p13	NODAL modulator 3	8274	1.33175	0.00390617	0.0295904
ENSG00000185739	6345	SRL	16	16p13.3	sarcalumenin	5702	1.3316	0.00123331	0.0128607
ENSG00000175463	374403	TBC1D10C	11	11q13.2	TBC1 domain family member 10C	4993	1.33097	0.000848805	0.00987347
ENSG00000166106	170689	ADAMTS15	11	11q25	ADAM metallopeptidase with thrombospondin type 1 motif 15	5673	1.32943	0.000968528	0.0108017
ENSG00000111145	2004	ELK3	12	12q23	ELK3, ETS-domain protein (SRF accessory protein 2)	4648	1.32925	0.000387964	0.00584164
ENSG00000138378	6775	STAT4	2	2q32.2-q32.3	signal transducer and activator of transcription 4	4250	1.32896	0.00545734	0.0376525
ENSG00000106565	28959	TMEM176B	7	7q36.1	transmembrane protein 176B	1979	1.32836	0.00026697	0.00448457
ENSG00000141338	10351	ABCA8	17	17q24	ATP binding cassette subfamily A member 8	11243	1.32804	0.000427597	0.00618864
ENSG00000148344	9536	PTGES	9	9q34.3	prostaglandin E synthase	1896	1.32471	0.00274746	0.02315
ENSG00000134201	2949	GSTM5	1	1p13.3	glutathione S-transferase mu 5	6013	1.32453	0.0025009	0.0215733
ENSG00000067141	4756	NEO1	15	15q22.3-q23	neogenin 1	8117	1.32352	0.000372884	0.00569762
ENSG00000131016	9590	AKAP12	6	6q24-q25	A-kinase anchoring protein 12	8741	1.32267	0.00148165	0.0147846
ENSG00000135362	79899	PRR5L	11	11p13-p12	proline rich 5 like	6616	1.32239	0.000182055	0.00347327
ENSG00000183876	340075	ARSI	5	5q32	arylsulfatase family member I	3269	1.32238	0.000258381	0.00441436
ENSG00000184702	5413	2021-09-05	22	22q11.21	septin 5	5914	1.32075	0.000207225	0.00379188
ENSG00000121440	23024	PDZRN3	3	3p13	PDZ domain containing ring finger 3	6136	1.32074	0.000442922	0.0063286
ENSG00000123570	51209	RAB9B	X	Xq22.2	RAB9B, member RAS oncogene family	3748	1.32059	0.00212126	0.0191361
ENSG00000101311	55612	FERMT1	20	20p12.3	fermitin family member 1	5359	1.31897	0.000290389	0.0047161
ENSG00000179820	91663	MYADM	19	19q13.42	myeloid-associated differentiation marker	3675	1.31887	0.000814657	0.00957308
ENSG00000172543	1521	CTSW	11	11q13.1	cathepsin W	1719	1.31645	0.00119807	0.012591
ENSG00000110881	41	ASIC1	12	12q12	acid sensing ion channel subunit 1	5745	1.31559	0.000721439	0.00882163
ENSG00000276231	146850	PIK3R6	17	17p13.1	phosphoinositide-3-kinase regulatory subunit 6	3564	1.31522	0.00247806	0.021459
ENSG00000186318	23621	BACE1	11	11q23.2-q23.3	beta-site APP-cleaving enzyme 1	7190	1.31438	2.19e-05	0.000778772
ENSG00000121858	8743	TNFSF10	3	3q26	tumor necrosis factor superfamily member 10	3473	1.31224	0.001842	0.0173128
ENSG00000112902	9037	SEMA5A	5	5p15.2	sema domain, seven thrombospondin repeats (type 1 and type 1-like), transmembrane domain (TM) and short cytoplasmic domain, (semaphorin) 5A	12097	1.31213	0.000503252	0.00685564
ENSG00000173848	10276	NET1	10	10p15	neuroepithelial cell transforming 1	4175	1.3112	0.00023091	0.00407001
ENSG00000180447	2619	GAS1	9	9q21.3-q22	growth arrest specific 1	2827	1.31119	0.000365576	0.00561149
ENSG00000089225	6910	TBX5	12	12q24.1	T-box 5	4363	1.31099	0.00624333	0.0416648
ENSG00000105737	2901	GRIK5	19	19q13.2	glutamate receptor, ionotropic, kainate 5	5014	1.31052	0.0018159	0.0171753
ENSG00000166086	83700	JAM3	11	11q25	junctional adhesion molecule 3	5451	1.31036	0.000285393	0.00466883
ENSG00000185697	4603	MYBL1	8	8q13.1	v-myb avian myeloblastosis viral oncogene homolog-like 1	7239	1.30987	0.0063926	0.0423794
ENSG00000197121	80055	PGAP1	2	2q33.1	post-GPI attachment to proteins 1	12761	1.3098	0.000998179	0.010962
ENSG00000106571	2737	GLI3	7	7p13	GLI family zinc finger 3	9239	1.30973	0.000279914	0.00461859
ENSG00000124003	116255	MOGAT1	2	2q36.1	monoacylglycerol O-acyltransferase 1	1048	1.30969	0.00680693	0.0440399
ENSG00000164684	619279	ZNF704	8	8q21.13	zinc finger protein 704	15008	1.30889	0.00183281	0.0172626
ENSG00000164929	79870	BAALC	8	8q22.3	brain and acute leukemia, cytoplasmic	3997	1.30713	0.00136936	0.0138806
ENSG00000173918	114897	C1QTNF1	17	17q25.3	C1q and tumor necrosis factor related protein 1	4854	1.30681	0.000651285	0.00827569
ENSG00000124496	55809	TRERF1	6	6p21.1-p12.1	transcriptional regulating factor 1	7732	1.30666	0.00281139	0.0235117
ENSG00000196159	79633	FAT4	4	4q28.1	FAT atypical cadherin 4	16439	1.30665	0.00200719	0.0183202
ENSG00000114923	6508	SLC4A3	2	2q36	solute carrier family 4 (anion exchanger), member 3	5091	1.30628	0.000437556	0.00628537
ENSG00000006118	54972	TMEM132A	11	11q12.2	transmembrane protein 132A	7271	1.30576	1.67e-05	0.00063848
ENSG00000177432	266812	NAP1L5	4	4q22.1|4q21-q22	nucleosome assembly protein 1-like 5	2321	1.30545	0.000432174	0.00624143
ENSG00000123342	4327	MMP19	12	12q14	matrix metallopeptidase 19	4672	1.30454	0.00181842	0.0171753
ENSG00000027869	9047	SH2D2A	1	1q21	SH2 domain containing 2A	2512	1.3045	0.00669758	0.0435197
ENSG00000101197	79444	BIRC7	20	20q13.3	baculoviral IAP repeat containing 7	1562	1.30449	0.00408902	0.0304095
ENSG00000118762	5311	PKD2	4	4q22.1	polycystic kidney disease 2 (autosomal dominant)	5498	1.30368	0.00165063	0.0159954
ENSG00000108176	56521	DNAJC12	10	10q22.1	DnaJ heat shock protein family (Hsp40) member C12	2121	1.30232	0.00061253	0.00797179
ENSG00000137965	10561	IFI44	1	1p31.1	interferon induced protein 44	2038	1.30166	0.00125101	0.0129949
ENSG00000240771	115557	ARHGEF25	12	12q13.3	Rho guanine nucleotide exchange factor 25	3503	1.30164	0.000498531	0.0068163
ENSG00000197584	10242	KCNMB2	3	3q26.32	potassium channel subfamily M regulatory beta subunit 2	3542	1.29995	0.00401274	0.0300418
ENSG00000221866	91584	PLXNA4	7	7q32.3	plexin A4	16372	1.2998	0.00146619	0.0146521
ENSG00000169071	4920	ROR2	9	9q22	receptor tyrosine kinase-like orphan receptor 2	5818	1.29963	0.000153659	0.00307487
ENSG00000197594	5167	ENPP1	6	6q22-q23	ectonucleotide pyrophosphatase/phosphodiesterase 1	8294	1.29923	0.00250611	0.0216044
ENSG00000154175	25890	ABI3BP	3	3q12	ABI family member 3 binding protein	10978	1.29619	0.00192137	0.0178464
ENSG00000198598	4326	MMP17	12	12q24.3	matrix metallopeptidase 17	4003	1.29598	7.6e-05	0.00181537
ENSG00000184574	57121	LPAR5	12	12p13.31	lysophosphatidic acid receptor 5	3258	1.29553	0.000109018	0.0024162
ENSG00000166033	5654	HTRA1	10	10q26.3	HtrA serine peptidase 1	2120	1.29532	5.54e-06	0.000291733
ENSG00000171714	203859	ANO5	11	11p14.3	anoctamin 5	6900	1.29433	0.000460515	0.00649703
ENSG00000133657	79572	ATP13A3	3	3q29	ATPase type 13A3	11864	1.29286	0.00163677	0.0159071
ENSG00000138190	54536	EXOC6	10	10q23.33	exocyst complex component 6	6193	1.29283	6.73e-05	0.00167081
ENSG00000090889	24137	KIF4A	X	Xq13.1	kinesin family member 4A	4533	1.29236	0.00113091	0.0120806
ENSG00000057294	5318	PKP2	12	12p11	plakophilin 2	7043	1.29144	0.00709125	0.045234
ENSG00000134245	7482	WNT2B	1	1p13	wingless-type MMTV integration site family member 2B	12561	1.29143	0.00184838	0.0173363
ENSG00000011028	9902	MRC2	17	17q23.2	mannose receptor, C type 2	6860	1.29018	0.000394067	0.0058905
ENSG00000184293	160365	CLECL1	12	12p13.31	C-type lectin like 1	1721	1.28927	0.00276259	0.0232483
ENSG00000177791	58529	MYOZ1	10	10q22.1	myozenin 1	1541	1.28695	0.00154242	0.0151904
ENSG00000254004	339324	ZNF260	19	19q13.12	zinc finger protein 260	5952	1.28564	0.0019379	0.0179627
ENSG00000164764	157869	SBSPON	8	8q21.11	somatomedin B and thrombospondin type 1 domain containing	4383	1.28449	0.00267091	0.0226757
ENSG00000150630	7424	VEGFC	4	4q34.3	vascular endothelial growth factor C	2420	1.28391	0.0020305	0.0184767
ENSG00000128791	57045	TWSG1	18	18p11.3	twisted gastrulation BMP signaling modulator 1	4435	1.28355	0.000435929	0.00626937
ENSG00000171488	84230	LRRC8C	1	1p22.2	leucine-rich repeat containing 8 family member C	11724	1.2829	0.00153041	0.0151298
ENSG00000055118	3757	KCNH2	7	7q36.1	potassium channel, voltage gated eag related subfamily H, member 2	5877	1.28167	0.000360634	0.00555468
ENSG00000204851	57469	PNMAL2	19	19q13.32	paraneoplastic Ma antigen family-like 2	5506	1.27919	0.00178467	0.0170241
ENSG00000152689	25780	RASGRP3	2	2p25.1-p24.1	RAS guanyl releasing protein 3 (calcium and DAG-regulated)	11118	1.27899	0.000175265	0.00339681
ENSG00000183853	55243	KIRREL	1	1q23.1	kin of IRRE like (Drosophila)	7872	1.27839	9.73e-05	0.0021919
ENSG00000136895	84253	GARNL3	9	9q33.3	GTPase activating Rap/RanGAP domain-like 3	9695	1.27835	0.000348665	0.00542005
ENSG00000187801	65243	ZFP69B	1	1p34.2	ZFP69 zinc finger protein B	2386	1.27824	0.000853333	0.00990589
ENSG00000088992	54997	TESC	12	12q24.22	tescalcin	1926	1.278	5.47e-05	0.00146049
ENSG00000105559	57664	PLEKHA4	19	19q13.33	pleckstrin homology domain containing A4	3851	1.27757	0.000133742	0.00278309
ENSG00000198121	1902	LPAR1	9	9q31.3	lysophosphatidic acid receptor 1	4159	1.27747	0.000323316	0.00510877
ENSG00000203814	440689	HIST2H2BF	1	1q21.2	histone cluster 2, H2bf	3196	1.27587	0.00402002	0.0300628
ENSG00000082512	7188	TRAF5	1	1q32	TNF receptor associated factor 5	9022	1.27576	0.00693078	0.0445607
ENSG00000145850	91937	TIMD4	5	5q33.3	T-cell immunoglobulin and mucin domain containing 4	1555	1.27536	0.00746172	0.0469187
ENSG00000171522	5734	PTGER4	5	5p13.1	prostaglandin E receptor 4	3961	1.27527	0.000907748	0.0103761
ENSG00000144476	57007	ACKR3	2	2q37.3	atypical chemokine receptor 3	2258	1.27498	0.00204733	0.0185795
ENSG00000106799	7046	TGFBR1	9	9q22	transforming growth factor beta receptor I	6844	1.27466	0.000960699	0.0107363
ENSG00000164056	10252	SPRY1	4	4q28.1	sprouty RTK signaling antagonist 1	3963	1.27376	0.00012775	0.00270633
ENSG00000111186	81029	WNT5B	12	12p13.3	wingless-type MMTV integration site family member 5B	4305	1.27344	0.000351769	0.00544938
ENSG00000038295	7092	TLL1	4	4q32.3	tolloid like 1	7522	1.27341	0.00399026	0.0300074
ENSG00000163536	5274	SERPINI1	3	3q26.1	serpin peptidase inhibitor, clade I (neuroserpin), member 1	2418	1.27332	0.00063158	0.00815649
ENSG00000150093	3688	ITGB1	10	10p11.2	integrin subunit beta 1	6011	1.27324	8.12e-05	0.00189826
ENSG00000173175	111	ADCY5	3	3q21.1	adenylate cyclase 5	8873	1.27184	0.00563126	0.0384362
ENSG00000059758	5128	CDK17	12	12q23.1	cyclin-dependent kinase 17	6547	1.26973	0.00187681	0.0175051
ENSG00000162723	89886	SLAMF9	1	1q23.2	SLAM family member 9	1156	1.26964	0.00448072	0.0324503
ENSG00000167552	7846	TUBA1A	12	12q13.12	tubulin alpha 1a	3421	1.26822	0.000351046	0.00544446
ENSG00000134363	10468	FST	5	5q11.2	follistatin	2969	1.26777	0.00100847	0.0110479
ENSG00000134321	91543	RSAD2	2	2p25.2	radical S-adenosyl methionine domain containing 2	4834	1.26748	0.00471159	0.0335888
ENSG00000239713	60489	APOBEC3G	22	22q13.1-q13.2	apolipoprotein B mRNA editing enzyme, catalytic polypeptide-like 3G	5454	1.2671	0.000492546	0.0067642
ENSG00000138606	90525	SHF	15	15q21.1	Src homology 2 domain containing F	4894	1.26586	7.1e-05	0.00173293
ENSG00000165424	219654	ZCCHC24	10	10q22.3	zinc finger, CCHC domain containing 24	5051	1.26547	0.000486395	0.00671088
ENSG00000168246	92181	UBTD2	5	5q35.1	ubiquitin domain containing 2	3301	1.26541	9.42e-06	0.000421239
ENSG00000144031	79998	ANKRD53	2	2p13.3	ankyrin repeat domain 53	2526	1.26511	0.000855185	0.0099107
ENSG00000064651	6558	SLC12A2	5	5q23.3	solute carrier family 12 (sodium/potassium/chloride transporter), member 2	10664	1.26082	0.00378524	0.0290344
ENSG00000167123	51148	CERCAM	9	9q34.11	cerebral endothelial cell adhesion molecule	6059	1.26066	0.000280545	0.00462331
ENSG00000163071	132671	SPATA18	4	4q12	spermatogenesis associated 18	4941	1.26058	0.00442509	0.0321609
ENSG00000135437	5959	RDH5	12	12q13-q14	retinol dehydrogenase 5 (11-cis/9-cis)	2983	1.26047	0.00631994	0.0420838
ENSG00000174348	127435	PODN	1	1p32.3	podocan	4900	1.25822	0.00211438	0.0190977
ENSG00000166402	7275	TUB	11	11p15.5	tubby bipartite transcription factor	6722	1.25814	0.00315421	0.0255977
ENSG00000162694	2135	EXTL2	1	1p21	exostosin-like glycosyltransferase 2	4834	1.25687	0.000209254	0.00380848
ENSG00000122861	5328	PLAU	10	10q22.2	plasminogen activator, urokinase	2950	1.25675	0.00297794	0.0245078
ENSG00000166780	89927	C16orf45	16	16p13.11	chromosome 16 open reading frame 45	3688	1.25664	0.000272808	0.00455
ENSG00000185630	5087	PBX1	1	1q23	pre-B-cell leukemia homeobox 1	21249	1.25661	0.00028515	0.00466883
ENSG00000142173	1292	COL6A2	21	21q22.3	collagen, type VI, alpha 2	5386	1.2562	0.00672554	0.0436802
ENSG00000180739	53637	S1PR5	19	19p13.2	sphingosine-1-phosphate receptor 5	2806	1.25539	0.000995407	0.010962
ENSG00000144354	83879	CDCA7	2	2q31	cell division cycle associated 7	3934	1.25318	0.00278814	0.0234047
ENSG00000101605	8736	MYOM1	18	18p11.31	myomesin 1	6574	1.25201	0.00485724	0.0343717
ENSG00000042980	10863	ADAM28	8	8p21.2	ADAM metallopeptidase domain 28	9351	1.24964	0.0055841	0.0381874
ENSG00000139910	4857	NOVA1	14	14q	neuro-oncological ventral antigen 1	10046	1.24928	0.00126322	0.0130712
ENSG00000132563	51308	REEP2	5	5q31	receptor accessory protein 2	3284	1.24829	0.00459127	0.0329761
ENSG00000106333	5118	PCOLCE	7	7q22	procollagen C-endopeptidase enhancer	3532	1.24806	0.000711715	0.00875767
ENSG00000205978	57523	NYNRIN	14	14q12	NYN domain and retroviral integrase containing	7955	1.24653	0.000761027	0.00912621
ENSG00000115318	84695	LOXL3	2	2p13	lysyl oxidase like 3	4363	1.24376	0.00140451	0.0141835
ENSG00000067208	7813	EVI5	1	1p22.1	ecotropic viral integration site 5	8276	1.24343	0.00772939	0.0480175
ENSG00000149599	128853	DUSP15	20	20q11.21	dual specificity phosphatase 15	3791	1.24321	0.00132541	0.0135722
ENSG00000141404	2774	GNAL	18	18p11.22-p11.21	guanine nucleotide binding protein (G protein), alpha activating activity polypeptide, olfactory type	8445	1.24231	0.000494786	0.00678109
ENSG00000239474	10324	KLHL41	2	2q31.1	kelch like family member 41	2620	1.24194	0.000185268	0.00349977
ENSG00000166068	161742	SPRED1	15	15q14	sprouty-related, EVH1 domain containing 1	8260	1.24054	0.000214015	0.00385831
ENSG00000203722	353091	RAET1G	6	6q24.1-q25.1	retinoic acid early transcript 1G	1486	1.24007	0.00106325	0.0115445
ENSG00000219438	25817	FAM19A5	22	22q13.32	family with sequence similarity 19 (chemokine (C-C motif)-like), member A5	3173	1.23947	0.000114773	0.00249857
ENSG00000198300	5178	PEG3	19	19q13.4	paternally expressed 3	9278	1.23942	0.0020924	0.0189374
ENSG00000166483	7465	WEE1	11	11p15.4	WEE1 G2 checkpoint kinase	9239	1.23918	0.000138551	0.0028454
ENSG00000172985	344558	SH3RF3	2	2q13	SH3 domain containing ring finger 3	5803	1.23907	0.00122184	0.0127908
ENSG00000136720	9394	HS6ST1	2	2q21	heparan sulfate 6-O-sulfotransferase 1	4683	1.23865	7.37e-05	0.00177768
ENSG00000152503	55521	TRIM36	5	5q22.3	tripartite motif containing 36	6113	1.2378	0.00024104	0.0041881
ENSG00000131459	9945	GFPT2	5	5q34-q35	glutamine-fructose-6-phosphate transaminase 2	4780	1.23771	0.00209128	0.0189374
ENSG00000081818	56131	PCDHB4	5	5q31	protocadherin beta 4	3825	1.23751	0.00105477	0.0114803
ENSG00000126016	154796	AMOT	X	Xq23	angiomotin	8502	1.23723	0.000212135	0.00383035
ENSG00000198821	919	CD247	1	1q24.2	CD247 molecule	4034	1.23715	0.00399299	0.0300111
ENSG00000104814	11184	MAP4K1	19	19q13.1-q13.4	mitogen-activated protein kinase kinase kinase kinase 1	3953	1.23537	0.00522505	0.0364749
ENSG00000256043	1519	CTSO	4	4q32.1	cathepsin O	2954	1.23404	0.000330657	0.0052064
ENSG00000197321	6840	SVIL	10	10p11.2	supervillin	9937	1.23258	0.00183898	0.0172965
ENSG00000177839	56127	PCDHB9	5	5q31	protocadherin beta 9	4415	1.23205	0.000506441	0.00687767
ENSG00000124749	81578	COL21A1	6	6p12.3-p11.2|6p12.3-p11.2	collagen, type XXI, alpha 1	7078	1.23078	0.000637026	0.00816016
ENSG00000077522	88	ACTN2	1	1q42-q43	actinin, alpha 2	5530	1.22913	0.00593548	0.0401609
ENSG00000243156	57553	MICAL3	22	22q11.21	microtubule associated monooxygenase, calponin and LIM domain containing 3	22354	1.22906	0.00450039	0.0325147
ENSG00000153956	781	CACNA2D1	7	7q21-q22	calcium channel, voltage-dependent, alpha 2/delta subunit 1	9010	1.22849	0.00324647	0.0260786
ENSG00000171649	284307	ZIK1	19	19q13.43	zinc finger protein interacting with K protein 1	5257	1.22749	8.02e-05	0.00188953
ENSG00000078549	117	ADCYAP1R1	7	7p14	adenylate cyclase activating polypeptide 1 (pituitary) receptor type I	6832	1.22661	0.00549022	0.037815
ENSG00000162437	55225	RAVER2	1	1p31.3	ribonucleoprotein, PTB-binding 2	6070	1.22654	0.000416514	0.00608726
ENSG00000149260	726	CAPN5	11	11q14	calpain 5	6166	1.22641	3.57e-05	0.00107138
ENSG00000018408	25937	WWTR1	3	3q23-q24	WW domain containing transcription regulator 1	8413	1.22522	0.00135637	0.0138011
ENSG00000118515	6446	SGK1	6	6q23	serum/glucocorticoid regulated kinase 1	9992	1.22417	0.000421865	0.00614541
ENSG00000151474	55691	FRMD4A	10	10p13	FERM domain containing 4A	13328	1.22319	0.00704176	0.0449942
ENSG00000102010	660	BMX	X	Xp22.2	BMX non-receptor tyrosine kinase	2806	1.22306	0.000805441	0.00953117
ENSG00000111335	4939	OAS2	12	12q24.2	2'-5'-oligoadenylate synthetase 2	6264	1.22271	0.00194067	0.017976
ENSG00000188312	401541	CENPP	9	9q22.31	centromere protein P	9794	1.22241	0.000743632	0.00899165
ENSG00000205710	100130311	C17orf107	17	17p13.2	chromosome 17 open reading frame 107	3408	1.22232	0.000902645	0.0103354
ENSG00000081059	6932	TCF7	5	5q31.1	transcription factor 7 (T-cell specific, HMG-box)	10063	1.22098	0.00180204	0.0170953
ENSG00000125354	23157	2021-09-06	X	Xq24	septin 6	6245	1.22032	0.000704523	0.00871312
ENSG00000083857	2195	FAT1	4	4q35	FAT atypical cadherin 1	16177	1.22023	0.000808713	0.00954314
ENSG00000185633	56901	NDUFA4L2	12	12q13.3	NADH dehydrogenase (ubiquinone) 1 alpha subcomplex, 4-like 2	2806	1.21866	0.000635205	0.00816016
ENSG00000171385	3752	KCND3	1	1p13.3	potassium channel, voltage gated Shal related subfamily D, member 3	7863	1.21786	0.000150443	0.00303153
ENSG00000117519	1266	CNN3	1	1p22-p21	calponin 3, acidic	2838	1.21761	0.000494554	0.00678109
ENSG00000115556	84812	PLCD4	2	2q35	phospholipase C delta 4	5867	1.21678	0.000527607	0.00709338
ENSG00000138386	4664	NAB1	2	2q32.3-q33	NGFI-A binding protein 1	4887	1.21673	0.00348299	0.0272135
ENSG00000100336	80832	APOL4	22	22q11.2-q13.2	apolipoprotein L4	4377	1.21539	0.00687411	0.0443236
ENSG00000133874	79845	RNF122	8	8p12	ring finger protein 122	1868	1.21472	0.00368044	0.0283701
ENSG00000134121	10752	CHL1	3	3p26.1	cell adhesion molecule L1-like	11861	1.21339	0.00435647	0.0317653
ENSG00000173698	10149	ADGRG2	X	Xp22.13	adhesion G protein-coupled receptor G2	10155	1.21193	0.000639534	0.008165
ENSG00000137502	27314	RAB30	11	11q14.1	RAB30, member RAS oncogene family	11832	1.21158	0.00264443	0.0224793
ENSG00000137094	25822	DNAJB5	9	9p13.3	DnaJ heat shock protein family (Hsp40) member B5	5891	1.21152	0.000229885	0.00407001
ENSG00000146072	27242	TNFRSF21	6	6p21.1	tumor necrosis factor receptor superfamily member 21	3595	1.20961	2.82e-06	0.000188388
ENSG00000198133	161145	TMEM229B	14	14q24.1	transmembrane protein 229B	6377	1.20803	0.000410818	0.00604348
ENSG00000110660	54733	SLC35F2	11	11q22.3	solute carrier family 35 member F2	3717	1.20778	0.00039871	0.0059139
ENSG00000144649	729085	FAM198A	3	3p22.1	family with sequence similarity 198 member A	4411	1.20704	0.000756182	0.00908607
ENSG00000150510	220108	FAM124A	13	13q14.3	family with sequence similarity 124 member A	6702	1.20675	0.000921067	0.010466
ENSG00000092096	51310	SLC22A17	14	14q11.2	solute carrier family 22 member 17	4278	1.20665	0.000246832	0.00425571
ENSG00000162999	142679	DUSP19	2	2q32.1	dual specificity phosphatase 19	5376	1.20451	0.00329733	0.026236
ENSG00000166845	162681	C18orf54	18	18q21.2	chromosome 18 open reading frame 54	6062	1.20412	0.00746037	0.0469187
ENSG00000198336	4635	MYL4	17	17q21.32	myosin light chain 4	1636	1.20316	0.000649762	0.00826416
ENSG00000174080	8722	CTSF	11	11q13	cathepsin F	2896	1.20285	0.00041976	0.00612139
ENSG00000176531	653583	PHLDB3	19	19q13.31	pleckstrin homology-like domain, family B, member 3	4553	1.20283	0.000503288	0.00685564
ENSG00000165490	220042	DDIAS	11	11q14.1	DNA damage-induced apoptosis suppressor	5339	1.20271	0.000817755	0.00960076
ENSG00000196923	9260	PDLIM7	5	5q35.3	PDZ and LIM domain 7	4407	1.19892	0.000687686	0.00860334
ENSG00000117586	7292	TNFSF4	1	1q25	tumor necrosis factor superfamily member 4	3942	1.19889	0.000362302	0.00557397
ENSG00000185920	5727	PTCH1	9	9q22.3	patched 1	16591	1.19769	0.0042831	0.0313837
ENSG00000120949	943	TNFRSF8	1	1p36	tumor necrosis factor receptor superfamily member 8	3738	1.19754	0.00232662	0.0204476
ENSG00000006638	6915	TBXA2R	19	19p13.3	thromboxane A2 receptor	2793	1.19725	0.00661366	0.0432253
ENSG00000120658	55068	ENOX1	13	13q14.11	ecto-NOX disulfide-thiol exchanger 1	3139	1.19704	0.00289809	0.0240231
ENSG00000169302	202374	STK32A	5	5q32	serine/threonine kinase 32A	7776	1.19589	0.00433056	0.0316624
ENSG00000099864	5064	PALM	19	19p13.3	paralemmin	4908	1.19553	0.000376336	0.00572509
ENSG00000198420	9747	TCAF1	7	7q35	TRPM8 channel-associated factor 1	6310	1.1948	0.00261818	0.0223268
ENSG00000182158	64764	CREB3L2	7	7q34	cAMP responsive element binding protein 3-like 2	8788	1.19451	0.000110814	0.0024439
ENSG00000171631	5031	P2RY6	11	11q13.4	pyrimidinergic receptor P2Y, G-protein coupled, 6	3976	1.19371	0.00291877	0.0241243
ENSG00000137628	55601	DDX60	4	4q32.3	DEAD (Asp-Glu-Ala-Asp) box polypeptide 60	6750	1.19168	0.00656235	0.0430524
ENSG00000205189	65986	ZBTB10	8	8q13-q21.1	zinc finger and BTB domain containing 10	10216	1.19067	0.00332417	0.0263808
ENSG00000106772	158471	PRUNE2	9	9q21.2	prune homolog 2 (Drosophila)	14656	1.18857	0.00640006	0.0423794
ENSG00000188158	4810	NHS	X	Xp22.13	NHS actin remodeling regulator	10168	1.18816	0.00329489	0.026236
ENSG00000130147	23677	SH3BP4	2	2q37.1-q37.2	SH3-domain binding protein 4	7129	1.18777	0.000111559	0.00244829
ENSG00000177694	254827	NAALADL2	3	3q26.31	N-acetylated alpha-linked acidic dipeptidase-like 2	13599	1.18701	0.000187031	0.00352315
ENSG00000170456	160518	DENND5B	12	12p11.21	DENN/MADD domain containing 5B	11310	1.18594	0.00706106	0.0450961
ENSG00000104432	3574	IL7	8	8q12-q13	interleukin 7	3392	1.18571	0.000697107	0.00866128
ENSG00000107201	23586	DDX58	9	9p12	DEAD (Asp-Glu-Ala-Asp) box polypeptide 58	4353	1.18458	0.000992219	0.0109561
ENSG00000171016	26108	PYGO1	15	15q21.3	pygopus family PHD finger 1	8594	1.18393	0.00320082	0.0258665
ENSG00000107796	59	ACTA2	10	10q23.3	actin, alpha 2, smooth muscle, aorta	3027	1.18387	0.00812976	0.0497679
ENSG00000137563	8836	GGH	8	8q12.3	gamma-glutamyl hydrolase (conjugase, folylpolygammaglutamyl hydrolase)	3130	1.18349	0.00120702	0.0126752
ENSG00000272674	57717	PCDHB16	5	5q31	protocadherin beta 16	5001	1.1831	0.00080756	0.00953944
ENSG00000166831	348093	RBPMS2	15	15q22.31	RNA binding protein with multiple splicing 2	2101	1.18271	0.00299602	0.024574
ENSG00000172123	55106	SLFN12	17	17q12	schlafen family member 12	3560	1.18254	0.000452052	0.00641808
ENSG00000175745	7025	NR2F1	5	5q14	nuclear receptor subfamily 2 group F member 1	4201	1.18236	0.000886134	0.0102073
ENSG00000110330	329	BIRC2	11	11q22	baculoviral IAP repeat containing 2	4532	1.18235	0.00180601	0.0171061
ENSG00000204397	114769	CARD16	11	11q22	caspase recruitment domain family member 16	1688	1.18107	0.000608091	0.00793709
ENSG00000177335	286122	C8orf31	8	8q24.3	chromosome 8 open reading frame 31	2929	1.18054	0.000892182	0.010234
ENSG00000164604	54329	GPR85	7	7q31	G protein-coupled receptor 85	7396	1.18019	0.000181264	0.00347312
ENSG00000105655	51477	ISYNA1	19	19p13.11	inositol-3-phosphate synthase 1	3284	1.17913	0.000258663	0.00441436
ENSG00000189042	163081	ZNF567	19	19q13.12	zinc finger protein 567	4724	1.17781	0.00712625	0.0453185
ENSG00000134369	89796	NAV1	1	1q32.3	neuron navigator 1	22453	1.17744	0.00350854	0.0273178
ENSG00000172794	326624	RAB37	17	17q25.1	RAB37, member RAS oncogene family	5074	1.1766	0.000706671	0.00873164
ENSG00000181458	55076	TMEM45A	3	3q12.2	transmembrane protein 45A	6005	1.17629	0.000924237	0.0104708
ENSG00000123572	203447	NRK	X	Xq22.3	Nik related kinase	9573	1.17589	0.00791893	0.0489008
ENSG00000165338	143279	HECTD2	10	10q23.32	HECT domain containing E3 ubiquitin protein ligase 2	11550	1.1758	0.00555111	0.0380781
ENSG00000102038	6594	SMARCA1	X	Xq25	SWI/SNF related, matrix associated, actin dependent regulator of chromatin, subfamily a, member 1	4363	1.17381	0.000137392	0.00283894
ENSG00000173269	79812	MMRN2	10	10q23.2	multimerin 2	5334	1.17246	0.000336907	0.00528005
ENSG00000154511	388650	FAM69A	1	1p22.1	family with sequence similarity 69 member A	3091	1.17217	0.000111901	0.00245178
ENSG00000163378	285203	EOGT	3	3p14.1	EGF domain-specific O-linked N-acetylglucosamine (GlcNAc) transferase	5645	1.17121	0.00608883	0.0409618
ENSG00000144935	7220	TRPC1	3	3q23	transient receptor potential cation channel, subfamily C, member 1	4768	1.17049	0.00392267	0.0296152
ENSG00000130812	83854	ANGPTL6	19	19p13.2	angiopoietin like 6	2181	1.16906	0.000184276	0.00349577
ENSG00000140451	80119	PIF1	15	15q22.31	PIF1 5'-to-3' DNA helicase	4656	1.16614	0.00710265	0.045234
ENSG00000111405	8909	ENDOU	12	12q13.1	endonuclease, poly(U) specific	2679	1.1659	0.00540151	0.037408
ENSG00000137726	53826	FXYD6	11	11q23.3	FXYD domain containing ion transport regulator 6	5137	1.16565	0.00198195	0.0182326
ENSG00000236609	54753	ZNF853	7	7p22.1	zinc finger protein 853	3857	1.16335	0.000746459	0.00901591
ENSG00000183486	4600	MX2	21	21q22.3	MX dynamin-like GTPase 2	13047	1.16297	0.00173943	0.0166517
ENSG00000261934	56107	PCDHGA9	5	5q31	protocadherin gamma subfamily A, 9	4749	1.16285	0.00682496	0.0441126
ENSG00000183087	2621	GAS6	13	13q34	growth arrest specific 6	6006	1.1616	0.000287906	0.0046928
ENSG00000104447	7227	TRPS1	8	8q24.12	trichorhinophalangeal syndrome I	11072	1.16113	0.00384065	0.0292094
ENSG00000164691	117289	TAGAP	6	6q25.3	T-cell activation RhoGTPase activating protein	4089	1.15945	0.00203566	0.0184986
ENSG00000169083	367	AR	X	Xq12	androgen receptor	12775	1.15925	0.00212733	0.0191449
ENSG00000100351	9402	GRAP2	22	22q13.2	GRB2-related adaptor protein 2	6190	1.15922	0.0040404	0.0301869
ENSG00000126787	9787	DLGAP5	14	14q22.3	discs, large (Drosophila) homolog-associated protein 5	3667	1.15828	0.00357337	0.0277261
ENSG00000131171	6451	SH3BGRL	X	Xq13.3	SH3 domain binding glutamate-rich protein like	2304	1.15818	0.00108145	0.0116948
ENSG00000243811	140564	APOBEC3D	22	22q13.1	apolipoprotein B mRNA editing enzyme, catalytic polypeptide-like 3D	2545	1.15802	0.0040953	0.0304183
ENSG00000125378	652	BMP4	14	14q22-q23	bone morphogenetic protein 4	3082	1.15795	0.000141152	0.00288744
ENSG00000137821	54839	LRRC49	15	15q23	leucine rich repeat containing 49	9991	1.15708	0.0023161	0.0203851
ENSG00000204314	80863	PRRT1	6	6p21.32	proline-rich transmembrane protein 1	4261	1.15693	0.0036615	0.0282468
ENSG00000114450	59345	GNB4	3	3q26.33	guanine nucleotide binding protein (G protein), beta polypeptide 4	7035	1.15638	0.00297525	0.0245078
ENSG00000168785	10098	TSPAN5	4	4q23	tetraspanin 5	7430	1.15524	0.000115083	0.0025011
ENSG00000178695	115207	KCTD12	13	13q22.3	potassium channel tetramerization domain containing 12	6225	1.15466	0.0032893	0.026236
ENSG00000183943	5613	PRKX	X	Xp22.3	protein kinase, X-linked	6452	1.15463	0.00590373	0.0400175
ENSG00000182700	492311	IGIP	5	5q31	IgA-inducing protein	3458	1.15347	0.00666836	0.0434138
ENSG00000122574	644150	WIPF3	7	7p14.3	WAS/WASL interacting protein family member 3	6065	1.15341	0.00219212	0.0196112
ENSG00000184916	3714	JAG2	14	14q32	jagged 2	6397	1.1524	0.00165283	0.0160051
ENSG00000071051	8440	NCK2	2	2q12	NCK adaptor protein 2	2990	1.15137	0.000504845	0.00686989
ENSG00000181744	205428	C3orf58	3	3q24	chromosome 3 open reading frame 58	5487	1.15089	0.00152806	0.0151241
ENSG00000136636	51133	KCTD3	1	1q41	potassium channel tetramerization domain containing 3	4929	1.15063	0.00281072	0.0235117
ENSG00000134954	2113	ETS1	11	11q23.3	v-ets avian erythroblastosis virus E26 oncogene homolog 1	7149	1.15011	0.00523752	0.0364925
ENSG00000150764	85458	DIXDC1	11	11q23.1	DIX domain containing 1	8509	1.14956	0.000560634	0.00744795
ENSG00000034677	25897	RNF19A	8	8q22	ring finger protein 19A, RBR E3 ubiquitin protein ligase	6049	1.14953	0.00258296	0.0220967
ENSG00000185745	3434	IFIT1	10	10q23.31	interferon induced protein with tetratricopeptide repeats 1	4613	1.14867	0.0023958	0.0208812
ENSG00000167601	558	AXL	19	19q13.1	AXL receptor tyrosine kinase	5154	1.14853	0.000777964	0.00925494
ENSG00000145283	345274	SLC10A6	4	4q21.3	solute carrier family 10 (sodium/bile acid cotransporter), member 6	1502	1.14838	0.0051922	0.0362644
ENSG00000177103	57453	DSCAML1	11	11q23	Down syndrome cell adhesion molecule like 1	7035	1.1481	0.00710375	0.045234
ENSG00000092051	84502	JPH4	14	14q11	junctophilin 4	5307	1.14721	0.00118247	0.0124891
ENSG00000139173	84216	TMEM117	12	12q12	transmembrane protein 117	3440	1.14699	0.000393236	0.00588802
ENSG00000154122	56172	ANKH	5	5p15.1	ANKH inorganic pyrophosphate transport regulator	10865	1.14685	0.000168855	0.00331079
ENSG00000156299	7074	TIAM1	21	21q22.11	T-cell lymphoma invasion and metastasis 1	8751	1.14677	0.00392861	0.0296433
ENSG00000080986	10403	NDC80	18	18p11.32	NDC80 kinetochore complex component	3600	1.14675	0.00342227	0.0269566
ENSG00000186446	115560	ZNF501	3	3p21.31	zinc finger protein 501	3910	1.14651	0.00160838	0.0157335
ENSG00000131187	2161	F12	5	5q35.3	coagulation factor XII (Hageman factor)	2769	1.14589	0.000676017	0.00850172
ENSG00000035862	7077	TIMP2	17	17q25	TIMP metallopeptidase inhibitor 2	5633	1.14576	0.00112588	0.0120675
ENSG00000162373	79656	BEND5	1	1p33	BEN domain containing 5	2138	1.14559	0.00288875	0.0239943
ENSG00000131196	4772	NFATC1	18	18q23	nuclear factor of activated T-cells, cytoplasmic, calcineurin-dependent 1	9068	1.14537	0.000846809	0.00986426
ENSG00000010610	920	CD4	12	12p13.31	CD4 molecule	4583	1.14443	0.00334226	0.0264994
ENSG00000162458	54751	FBLIM1	1	1p36.21	filamin binding LIM protein 1	4716	1.14436	0.000449407	0.00640084
ENSG00000107438	9124	PDLIM1	10	10q23.1	PDZ and LIM domain 1	2239	1.14433	0.000262975	0.00446361
ENSG00000150687	11098	PRSS23	11	11q14.1	protease, serine 23	11725	1.14423	0.000234203	0.00409048
ENSG00000156049	9630	GNA14	9	9q21	guanine nucleotide binding protein (G protein), alpha 14	2721	1.14303	0.000730176	0.0088912
ENSG00000197565	1288	COL4A6	X	Xq22	collagen, type IV, alpha 6	9282	1.14246	0.00680715	0.0440399
ENSG00000148154	7357	UGCG	9	9q31	UDP-glucose ceramide glucosyltransferase	4615	1.14172	0.00342719	0.0269658
ENSG00000196208	9687	GREB1	2	2p25.1	growth regulation by estrogen in breast cancer 1	12361	1.14148	0.00243653	0.0211653
ENSG00000214226	339210	C17orf67	17	17q22	chromosome 17 open reading frame 67	2410	1.1414	0.000300131	0.00481608
ENSG00000123095	79365	BHLHE41	12	12p12.1	basic helix-loop-helix family member e41	3948	1.14125	0.00178662	0.0170265
ENSG00000002933	55365	TMEM176A	7	7q36.1	transmembrane protein 176A	3479	1.14071	0.00136209	0.0138382
ENSG00000185527	5148	PDE6G	17	17q25	phosphodiesterase 6G	1583	1.13973	0.00412211	0.0305205
ENSG00000160789	4000	LMNA	1	1q22	lamin A/C	6985	1.13939	0.000126995	0.00269884
ENSG00000157470	145773	FAM81A	15	15q22.2	family with sequence similarity 81 member A	5578	1.13887	0.00222357	0.0197832
ENSG00000150551	116372	LYPD1	2	2q21.2	LY6/PLAUR domain containing 1	2412	1.13824	0.00640226	0.0423794
ENSG00000114631	50512	PODXL2	3	3q21.3	podocalyxin-like 2	2186	1.13823	0.000129692	0.00273453
ENSG00000154548	135295	SRSF12	6	6q15	serine/arginine-rich splicing factor 12	4548	1.13665	0.00391889	0.0296033
ENSG00000100968	4776	NFATC4	14	14q11.2	nuclear factor of activated T-cells, cytoplasmic, calcineurin-dependent 4	8437	1.1363	0.000986847	0.010945
ENSG00000160050	79140	CCDC28B	1	1p36.11-p34.2	coiled-coil domain containing 28B	2818	1.13575	0.0016013	0.0156871
ENSG00000158458	9542	NRG2	5	5q31.2	neuregulin 2	4520	1.13561	0.0026583	0.022583
ENSG00000152953	55351	STK32B	4	4p16.2	serine/threonine kinase 32B	5324	1.13529	0.000184865	0.00349977
ENSG00000106723	10927	SPIN1	9	9q22.1	spindlin 1	4914	1.13513	0.000265544	0.00447739
ENSG00000165434	283209	PGM2L1	11	11q13.4	phosphoglucomutase 2-like 1	8820	1.13474	0.00297742	0.0245078
ENSG00000019144	23187	PHLDB1	11	11q23.3	pleckstrin homology-like domain, family B, member 1	21722	1.13453	0.00277877	0.0233552
ENSG00000136425	10518	CIB2	15	15q24	calcium and integrin binding family member 2	2146	1.1333	0.00154532	0.0152053
ENSG00000114115	5947	RBP1	3	3q23	retinol binding protein 1	3905	1.13209	0.00089224	0.010234
ENSG00000188070	65998	C11orf95	11	11q13	chromosome 11 open reading frame 95	5948	1.13198	0.000509375	0.00690355
ENSG00000188015	6274	S100A3	1	1q21	S100 calcium binding protein A3	955	1.13187	0.0078144	0.0484511
ENSG00000151746	636	BICD1	12	12p11.2-p11.1	bicaudal D homolog 1 (Drosophila)	12868	1.13123	0.00382897	0.0291701
ENSG00000258289	91612	CHURC1	14	14q23.3	churchill domain containing 1	5404	1.13027	0.00504834	0.0353884
ENSG00000121297	57616	TSHZ3	19	19q12	teashirt zinc finger homeobox 3	5817	1.12909	0.00183475	0.0172687
ENSG00000122642	11328	FKBP9	7	7p11.1	FK506 binding protein 9	5170	1.1281	0.000181764	0.00347312
ENSG00000162882	23498	HAAO	2	2p21	3-hydroxyanthranilate 3,4-dioxygenase	2726	1.1277	0.0005583	0.00743165
ENSG00000109805	64151	NCAPG	4	4p15.33	non-SMC condensin I complex subunit G	4921	1.12756	0.00457819	0.0328997
ENSG00000206190	57194	ATP10A	15	15q11.2	ATPase, class V, type 10A	8409	1.12754	0.00279792	0.0234721
ENSG00000167554	162963	ZNF610	19	19q13.41	zinc finger protein 610	3546	1.12623	0.00161763	0.0158125
ENSG00000077782	2260	FGFR1	8	8p11.23-p11.22	fibroblast growth factor receptor 1	12698	1.12613	0.000610746	0.00796002
ENSG00000069812	54626	HES2	1	1p36.31	hes family bHLH transcription factor 2	5407	1.1259	0.00280713	0.0235117
ENSG00000143850	22874	PLEKHA6	1	1q32.1	pleckstrin homology domain containing A6	7820	1.12563	0.00068796	0.00860334
ENSG00000083814	79891	ZNF671	19	19q13.43	zinc finger protein 671	3532	1.12559	0.000316729	0.00504027
ENSG00000169239	11238	CA5B	X	Xp21.1	carbonic anhydrase VB, mitochondrial	8520	1.1251	0.00287426	0.0239183
ENSG00000166949	4088	SMAD3	15	15q22.33	SMAD family member 3	9113	1.12457	0.000356033	0.0054901
ENSG00000115457	3485	IGFBP2	2	2q35	insulin like growth factor binding protein 2	4767	1.12457	0.00325187	0.0261063
ENSG00000163376	84541	KBTBD8	3	3p14	kelch repeat and BTB (POZ) domain containing 8	4736	1.12335	0.00413354	0.0305713
ENSG00000143515	57198	ATP8B2	1	1q21.3	ATPase, aminophospholipid transporter, class I, type 8B, member 2	7572	1.12235	0.00104688	0.0114132
ENSG00000125931	4435	CITED1	X	Xq13.1	Cbp/p300-interacting transactivator, with Glu/Asp rich carboxy-terminal domain, 1	1760	1.12065	0.00750083	0.0470239
ENSG00000021645	9369	NRXN3	14	14q31	neurexin 3	15535	1.11986	0.0029156	0.024113
ENSG00000166225	10818	FRS2	12	12q15	fibroblast growth factor receptor substrate 2	7242	1.11969	0.00143316	0.014397
ENSG00000030419	22807	IKZF2	2	2q34	IKAROS family zinc finger 2	12240	1.1196	0.00599424	0.0404363
ENSG00000204161	170371	C10orf128	10	10q11.23	chromosome 10 open reading frame 128	4123	1.11773	0.000215348	0.00387195
ENSG00000102547	81617	CAB39L	13	13q14.2	calcium binding protein 39 like	5006	1.11766	0.00236355	0.0206941
ENSG00000172638	30008	EFEMP2	11	11q13.1	EGF containing fibulin-like extracellular matrix protein 2	5397	1.11684	9.23e-05	0.00210402
ENSG00000196358	84628	NTNG2	9	9q34	netrin G2	7845	1.11604	0.00509554	0.0356449
ENSG00000117643	57134	MAN1C1	1	1p35	mannosidase, alpha, class 1C, member 1	9026	1.11549	3.78e-05	0.00111313
ENSG00000115415	6772	STAT1	2	2q32.2	signal transducer and activator of transcription 1	6053	1.11545	0.00494014	0.0348299
ENSG00000178882	144347	FAM101A	12	12q24.31	family with sequence similarity 101 member A	3173	1.11411	0.00415447	0.0306755
ENSG00000171357	541468	LURAP1	1	1p34	leucine rich adaptor protein 1	1854	1.11405	0.0019924	0.0182786
ENSG00000141756	60681	FKBP10	17	17q21.2	FK506 binding protein 10	4273	1.11287	0.000137752	0.00284201
ENSG00000172915	26960	NBEA	13	13q13	neurobeachin	11949	1.11265	0.00582275	0.0395376
ENSG00000174740	140886	PABPC5	X	Xq21.3	poly(A) binding protein, cytoplasmic 5	3450	1.11207	0.00399924	0.0300351
ENSG00000011201	3730	ANOS1	X	Xp22.32	anosmin 1	7132	1.11091	0.00405309	0.030211
ENSG00000011523	23177	CEP68	2	2p14	centrosomal protein 68kDa	8623	1.11074	0.000926162	0.0104708
ENSG00000115267	64135	IFIH1	2	2q24	interferon induced, with helicase C domain 1	4528	1.11044	0.00700999	0.0449125
ENSG00000006576	57157	PHTF2	7	7q11.23-q21	putative homeodomain transcription factor 2	8646	1.10894	0.00256143	0.0219404
ENSG00000084112	54434	SSH1	12	12q24.11	slingshot protein phosphatase 1	14537	1.10797	0.00762797	0.0475412
ENSG00000064692	9627	SNCAIP	5	5q23.2	synuclein alpha interacting protein	7325	1.10774	0.00404399	0.0301869
ENSG00000142552	57333	RCN3	19	19q13.33	reticulocalbin 3	2093	1.10747	0.00492894	0.0347875
ENSG00000260027	3217	HOXB7	17	17q21.3	homeobox B7	1528	1.1072	0.000187763	0.003532
ENSG00000148700	120	ADD3	10	10q25.2	adducin 3	6541	1.10699	0.00481767	0.0341277
ENSG00000178343	152573	SHISA3	4	4p13	shisa family member 3	1971	1.10611	0.00204329	0.0185554
ENSG00000211455	23012	STK38L	12	12p11.23	serine/threonine kinase 38 like	6921	1.10569	0.00329109	0.026236
ENSG00000171827	148268	ZNF570	19	19q13.12	zinc finger protein 570	6246	1.10558	0.00646812	0.0426686
ENSG00000134317	29841	GRHL1	2	2p25.1	grainyhead-like transcription factor 1	7952	1.10525	0.00084907	0.00987347
ENSG00000138443	10152	ABI2	2	2q33	abl-interactor 2	23331	1.10498	0.000846599	0.00986426
ENSG00000163110	10611	PDLIM5	4	4q22	PDZ and LIM domain 5	11090	1.10484	0.00048716	0.00671088
ENSG00000137070	3590	IL11RA	9	9p13	interleukin 11 receptor subunit alpha	4271	1.1048	0.00187143	0.0174672
ENSG00000162745	25903	OLFML2B	1	1q23.3	olfactomedin like 2B	3415	1.10409	0.00407183	0.0302985
ENSG00000182240	25825	BACE2	21	21q22.3	beta-site APP-cleaving enzyme 2	9619	1.10402	0.00024662	0.00425571
ENSG00000219481	55672	NBPF1	1	1p36.13	neuroblastoma breakpoint family member 1	12212	1.10358	0.00162333	0.0158451
ENSG00000185305	54622	ARL15	5	5p15.2	ADP ribosylation factor like GTPase 15	3797	1.10339	0.00135887	0.013816
ENSG00000115963	390	RND3	2	2q23.3	Rho family GTPase 3	3594	1.10296	0.00781726	0.0484511
ENSG00000164638	222962	SLC29A4	7	7p22.1	solute carrier family 29 (equilibrative nucleoside transporter), member 4	5811	1.10278	0.00198757	0.0182467
ENSG00000151135	90488	TMEM263	12	12q23.3	transmembrane protein 263	4768	1.10267	0.000799587	0.00947023
ENSG00000111331	4940	OAS3	12	12q24.2	2'-5'-oligoadenylate synthetase 3	8251	1.10243	0.00467005	0.0333635
ENSG00000100320	23543	RBFOX2	22	22q13.1	RNA binding protein, fox-1 homolog (C. elegans) 2	10014	1.10194	0.00138072	0.013961
ENSG00000164465	285761	DCBLD1	6	6q22.1	discoidin, CUB and LCCL domain containing 1	6819	1.09963	0.000878458	0.0101275
ENSG00000078804	58476	TP53INP2	20	20q11.22	tumor protein p53 inducible nuclear protein 2	4228	1.09934	0.000615755	0.00799607
ENSG00000130340	51429	SNX9	6	6q25.3	sorting nexin 9	4646	1.09927	0.000771344	0.00922522
ENSG00000163132	4487	MSX1	4	4p16.2	msh homeobox 1	2120	1.09863	0.00113046	0.0120806
ENSG00000099250	8829	NRP1	10	10p12	neuropilin 1	11522	1.09848	0.0034039	0.026877
ENSG00000179761	51268	PIPOX	17	17q11.2	pipecolic acid oxidase	4059	1.09822	0.000207862	0.00379835
ENSG00000144648	1238	ACKR2	3	3p21.3	atypical chemokine receptor 2	5457	1.09776	0.000863614	0.00998209
ENSG00000145777	85480	TSLP	5	5q22.1	thymic stromal lymphopoietin	4282	1.09639	0.00173851	0.0166517
ENSG00000102401	51566	ARMCX3	X	Xq22.1	armadillo repeat containing, X-linked 3	4239	1.0962	0.000573595	0.0075901
ENSG00000181804	285195	SLC9A9	3	3q24	solute carrier family 9, subfamily A (NHE9, cation proton antiporter 9), member 9	4087	1.09522	0.000662506	0.00838654
ENSG00000137273	2295	FOXF2	6	6p25.3	forkhead box F2	2187	1.09482	0.000943143	0.0105914
ENSG00000139793	10150	MBNL2	13	13q32.1	muscleblind-like splicing regulator 2	4908	1.09311	0.00760202	0.0474015
ENSG00000197016	388566	ZNF470	19	19q13.43	zinc finger protein 470	9627	1.09295	0.0059829	0.0403801
ENSG00000187210	2650	GCNT1	9	9q13	glucosaminyl (N-acetyl) transferase 1, core 2	6463	1.09257	0.00160603	0.015722
ENSG00000145284	79966	SCD5	4	4q21.22	stearoyl-CoA desaturase 5	4292	1.09248	0.000460315	0.00649703
ENSG00000146376	93663	ARHGAP18	6	6q22.33	Rho GTPase activating protein 18	4640	1.09228	0.00615373	0.0412429
ENSG00000168938	5480	PPIC	5	5q23.2	peptidylprolyl isomerase C (cyclophilin C)	2098	1.09139	6.76e-05	0.00167158
ENSG00000182809	1397	CRIP2	14	14q32.3	cysteine-rich protein 2	4837	1.09134	0.000258499	0.00441436
ENSG00000090534	7066	THPO	3	3q27	thrombopoietin	1915	1.09089	0.00199414	0.0182804
ENSG00000165801	55701	ARHGEF40	14	14q11.2	Rho guanine nucleotide exchange factor 40	8189	1.09069	0.000487838	0.00671328
ENSG00000176749	8851	CDK5R1	17	17q11.2	cyclin-dependent kinase 5, regulatory subunit 1 (p35)	4325	1.0902	0.0054272	0.0375349
ENSG00000183963	6525	SMTN	22	22q12.2	smoothelin	10242	1.09012	0.00800462	0.0493165
ENSG00000196950	57181	SLC39A10	2	2q32.3	solute carrier family 39 (zinc transporter), member 10	6917	1.08979	0.00137518	0.0139186
ENSG00000102302	2245	FGD1	X	Xp11.21	FYVE, RhoGEF and PH domain containing 1	4275	1.08971	0.00143104	0.0143865
ENSG00000109944	79864	C11orf63	11	11q24.1	chromosome 11 open reading frame 63	4680	1.08967	0.00341427	0.0269273
ENSG00000088881	57593	EBF4	20	20p13	early B-cell factor 4	3717	1.08966	0.00183193	0.0172626
ENSG00000186654	55615	PRR5	22	22q13	proline rich 5	5247	1.0893	0.000439586	0.00630105
ENSG00000168306	8309	ACOX2	3	3p14.3	acyl-CoA oxidase 2, branched chain	3859	1.08776	0.000219423	0.00392942
ENSG00000185761	339366	ADAMTSL5	19	19p13.3	ADAMTS like 5	3625	1.0875	0.0019443	0.0179971
ENSG00000008256	9265	CYTH3	7	7p22.1	cytohesin 3	5808	1.08715	0.000611033	0.00796002
ENSG00000065308	9697	TRAM2	6	6p21.1-p12	translocation associated membrane protein 2	6908	1.08704	0.000962487	0.0107458
ENSG00000135046	301	ANXA1	9	9q21.13	annexin A1	4561	1.08703	0.000233324	0.00408044
ENSG00000163328	151556	GPR155	2	2q31.1	G protein-coupled receptor 155	7769	1.08685	0.00376726	0.0289463
ENSG00000095794	1390	CREM	10	10p11.21	cAMP responsive element modulator	5699	1.0865	0.000915533	0.0104208
ENSG00000181588	399664	MEX3D	19	19p13.3	mex-3 RNA binding family member D	2850	1.08609	0.000382142	0.00578616
ENSG00000072858	54847	SIDT1	3	3q13.2	SID1 transmembrane family member 1	8060	1.08566	0.00163564	0.0159071
ENSG00000154102	404550	C16orf74	16	16q24.1	chromosome 16 open reading frame 74	2181	1.08484	0.000956272	0.0107031
ENSG00000152661	2697	GJA1	6	6q22.31	gap junction protein alpha 1	3037	1.08478	0.00199585	0.0182804
ENSG00000106080	55033	FKBP14	7	7p14.3	FK506 binding protein 14	5326	1.084	0.000743781	0.00899165
ENSG00000147862	4781	NFIB	9	9p24.1	nuclear factor I/B	11059	1.08369	0.00397211	0.0298876
ENSG00000104368	5327	PLAT	8	8p12	plasminogen activator, tissue	6618	1.08291	0.000347053	0.0054075
ENSG00000135245	29923	HILPDA	7	7q32.1	hypoxia inducible lipid droplet-associated	2070	1.08287	0.0022759	0.0200706
ENSG00000104043	79895	ATP8B4	15	15q21.2	ATPase, class I, type 8B, member 4	10861	1.08233	0.00368171	0.0283701
ENSG00000184588	5142	PDE4B	1	1p31	phosphodiesterase 4B	8644	1.08222	0.00289823	0.0240231
ENSG00000183742	346389	MACC1	7	7p21.1	metastasis associated in colon cancer 1	9898	1.08208	0.000690149	0.00862191
ENSG00000138134	57559	STAMBPL1	10	10q23.31	STAM binding protein like 1	6323	1.08062	0.00469838	0.0335124
ENSG00000138031	109	ADCY3	2	2p23.3	adenylate cyclase 3	6058	1.08053	0.000272377	0.00455
ENSG00000034053	321	APBA2	15	15q11-q12	amyloid beta (A4) precursor protein-binding, family A, member 2	6869	1.08051	0.00354626	0.0275635
ENSG00000185989	22821	RASA3	13	13q34	RAS p21 protein activator 3	4763	1.07926	0.000890248	0.010234
ENSG00000109079	7126	TNFAIP1	17	17q22-q23	TNF alpha induced protein 1	3889	1.07917	0.00282565	0.0236016
ENSG00000139970	6252	RTN1	14	14q23.1	reticulon 1	6209	1.07915	0.00112669	0.0120675
ENSG00000139211	347902	AMIGO2	12	12q13.11	adhesion molecule with Ig-like domain 2	3956	1.07814	0.00124555	0.0129481
ENSG00000125398	6662	SOX9	17	17q24.3	SRY-box 9	3935	1.07782	0.00613837	0.0411605
ENSG00000184867	9823	ARMCX2	X	Xq22.1	armadillo repeat containing, X-linked 2	3589	1.07765	0.000231868	0.00407123
ENSG00000135052	51280	GOLM1	9	9q21.33	golgi membrane protein 1	4233	1.07708	0.00099777	0.010962
ENSG00000143369	1893	ECM1	1	1q21	extracellular matrix protein 1	3360	1.07665	0.00154268	0.0151904
ENSG00000143384	4170	MCL1	1	1q21	myeloid cell leukemia 1	4371	1.07564	0.000544749	0.00729464
ENSG00000136108	26586	CKAP2	13	13q14	cytoskeleton associated protein 2	4547	1.07558	0.00435256	0.031758
ENSG00000087903	5990	RFX2	19	19p13.3	regulatory factor X2	9094	1.07558	0.0074	0.0466617
ENSG00000147697	56169	GSDMC	8	8q24.21	gasdermin C	2934	1.07523	0.0020326	0.0184833
ENSG00000169499	59339	PLEKHA2	8	8p11.22	pleckstrin homology domain containing A2	6325	1.07489	0.000998175	0.010962
ENSG00000189337	23254	KAZN	1	1p36.21	kazrin, periplakin interacting protein	12644	1.07457	0.00196151	0.0180941
ENSG00000169439	6383	SDC2	8	8q22-q23	syndecan 2	4536	1.07322	0.000353546	0.00546429
ENSG00000198908	80823	BHLHB9	X	Xq23	basic helix-loop-helix domain containing, class B, 9	5518	1.07231	0.00185649	0.017376
ENSG00000100077	157	ADRBK2	22	22q12.1	adrenergic, beta, receptor kinase 2	9303	1.07158	0.00328299	0.026236
ENSG00000100196	11015	KDELR3	22	22q13.1	KDEL endoplasmic reticulum protein retention receptor 3	1929	1.07082	0.000398927	0.0059139
ENSG00000106025	23554	TSPAN12	7	7q31.31	tetraspanin 12	3368	1.06974	0.0075912	0.047378
ENSG00000213145	1396	CRIP1	14	14q32.33	cysteine-rich protein 1 (intestinal)	2485	1.06969	0.000575263	0.00760468
ENSG00000131378	23180	RFTN1	3	3p24.3	raftlin, lipid raft linker 1	4776	1.06681	0.000341009	0.00533189
ENSG00000198286	84433	CARD11	7	7p22	caspase recruitment domain family member 11	4707	1.06655	0.00692407	0.0445389
ENSG00000087085	43	ACHE	7	7q22	acetylcholinesterase (Yt blood group)	3731	1.06468	0.00709751	0.045234
ENSG00000122545	989	2021-09-07	7	7p14.2	septin 7	10906	1.06305	0.00144827	0.0145162
ENSG00000133056	5287	PIK3C2B	1	1q32	phosphatidylinositol-4-phosphate 3-kinase catalytic subunit type 2 beta	9414	1.06274	0.00710165	0.045234
ENSG00000168016	9881	TRANK1	3	3p22.2	tetratricopeptide repeat and ankyrin repeat containing 1	11177	1.06239	0.00226825	0.0200163
ENSG00000184371	1435	CSF1	1	1p13.3	colony stimulating factor 1 (macrophage)	5418	1.06233	0.0043884	0.0319462
ENSG00000180801	79642	ARSJ	4	4q26	arylsulfatase family member J	5024	1.06229	0.00264048	0.0224742
ENSG00000197128	400720	ZNF772	19	19q13.43	zinc finger protein 772	6096	1.06196	0.00134088	0.013694
ENSG00000188042	10123	ARL4C	2	2q37.1	ADP ribosylation factor like GTPase 4C	4013	1.06018	0.000891756	0.010234
ENSG00000159899	4882	NPR2	9	9p21-p12	natriuretic peptide receptor 2	3865	1.05987	0.00257559	0.0220477
ENSG00000144815	91775	NXPE3	3	3q12.3	neurexophilin and PC-esterase domain family member 3	9474	1.05983	0.00272468	0.0230158
ENSG00000178202	143888	KDELC2	11	11q22.3	KDEL motif containing 2	4993	1.05941	0.00199668	0.0182804
ENSG00000198513	51062	ATL1	14	14q22.1	atlastin GTPase 1	4360	1.05793	0.000273048	0.00455
ENSG00000132386	5176	SERPINF1	17	17p13.3	serpin peptidase inhibitor, clade F (alpha-2 antiplasmin, pigment epithelium derived factor), member 1	3069	1.05645	0.00462055	0.0330936
ENSG00000112773	55603	FAM46A	6	6q14	family with sequence similarity 46 member A	6053	1.05631	0.00106143	0.011534
ENSG00000113369	57561	ARRDC3	5	5q14.3	arrestin domain containing 3	4934	1.05469	0.000910621	0.0103976
ENSG00000173950	152002	XXYLT1	3	3q29	xyloside xylosyltransferase 1	5409	1.0532	5.93e-05	0.001537
ENSG00000122592	3204	HOXA7	7	7p15.2	homeobox A7	2411	1.05263	0.00298067	0.0245152
ENSG00000161298	84911	ZNF382	19	19q13.12	zinc finger protein 382	11318	1.05238	0.00667779	0.0434542
ENSG00000137463	84709	MGARP	4	4q31.1	mitochondria localized glutamic acid rich protein	1339	1.0513	0.00107383	0.0116311
ENSG00000169756	3987	LIMS1	2	2q12.3	LIM and senescent cell antigen-like domains 1	7771	1.05125	0.000760538	0.00912621
ENSG00000104324	10404	CPQ	8	8q22.2	carboxypeptidase Q	3457	1.05042	3.62e-05	0.00107982
ENSG00000078596	9452	ITM2A	X	Xq13.3-Xq21.2	integral membrane protein 2A	2051	1.04912	0.00401097	0.0300418
ENSG00000146242	7162	TPBG	6	6q14-q15	trophoblast glycoprotein	6904	1.0484	0.000235387	0.0041005
ENSG00000072110	87	ACTN1	14	14q24|14q22-q24	actinin, alpha 1	10626	1.04812	0.000393009	0.00588802
ENSG00000176909	284358	MAMSTR	19	19q13.33	MEF2 activating motif and SAP domain containing transcriptional regulator	2265	1.04782	0.000331503	0.0052136
ENSG00000271601	128077	LIX1L	1	1q21.1	limb and CNS expressed 1 like	3975	1.04749	0.000343661	0.00536622
ENSG00000162711	114548	NLRP3	1	1q44	NLR family, pyrin domain containing 3	4757	1.04706	0.00777102	0.0482313
ENSG00000122707	8434	RECK	9	9p13.3	reversion-inducing-cysteine-rich protein with kazal motifs	6045	1.04586	0.00180819	0.0171148
ENSG00000158457	340348	TSPAN33	7	7q32.1	tetraspanin 33	2750	1.04527	0.00544506	0.0376003
ENSG00000145730	5066	PAM	5	5q14-q21	peptidylglycine alpha-amidating monooxygenase	8846	1.04457	0.000492174	0.0067642
ENSG00000175048	79683	ZDHHC14	6	6q25.3	zinc finger, DHHC-type containing 14	11121	1.04406	0.00191297	0.0177807
ENSG00000162407	8613	PLPP3	1	1p32.2	phospholipid phosphatase 3	5286	1.04245	0.00222539	0.0197832
ENSG00000163347	9076	CLDN1	3	3q28-q29	claudin 1	3663	1.04174	0.00469757	0.0335124
ENSG00000197712	92689	FAM114A1	4	4p14	family with sequence similarity 114 member A1	4871	1.04108	0.00044197	0.00632846
ENSG00000159674	10417	SPON2	4	4p16.3	spondin 2, extracellular matrix protein	6013	1.04025	0.0012325	0.0128607
ENSG00000166130	121457	IKBIP	12	12q23.1	IKBKB interacting protein	4163	1.03924	0.00118711	0.0125248
ENSG00000069535	4129	MAOB	X	Xp11.23	monoamine oxidase B	2891	1.03904	0.00136752	0.0138725
ENSG00000166974	10982	MAPRE2	18	18q12.1	microtubule associated protein RP/EB family member 2	6180	1.03735	0.000983214	0.0109227
ENSG00000106785	9830	TRIM14	9	9q22.33	tripartite motif containing 14	5469	1.03546	0.00363286	0.0280742
ENSG00000265190	653145	ANXA8	10	10q11.22	annexin A8	4955	1.03529	0.00326862	0.026172
ENSG00000106484	4232	MEST	7	7q32	mesoderm specific transcript	4631	1.03485	0.00668683	0.0434919
ENSG00000166479	54495	TMX3	18	18q22	thioredoxin-related transmembrane protein 3	7637	1.03422	0.00134177	0.013694
ENSG00000168679	9122	SLC16A4	1	1p13.3	solute carrier family 16 member 4	3167	1.0341	0.000638964	0.008165
ENSG00000140931	123920	CMTM3	16	16q21	CKLF-like MARVEL transmembrane domain containing 3	3163	1.0336	0.00125324	0.0130079
ENSG00000197093	79690	GAL3ST4	7	7q22.1	galactose-3-O-sulfotransferase 4	3397	1.03354	0.00326979	0.026172
ENSG00000188290	57801	HES4	1	1p36.33	hes family bHLH transcription factor 4	1118	1.03332	0.000807267	0.00953944
ENSG00000148120	84909	C9orf3	9	9q22.32	chromosome 9 open reading frame 3	10742	1.03045	0.000521437	0.00703155
ENSG00000169231	7059	THBS3	1	1q21	thrombospondin 3	4623	1.02923	0.00194906	0.0180164
ENSG00000173218	81839	VANGL1	1	1p13.1	VANGL planar cell polarity protein 1	9062	1.02921	0.000223764	0.0039912
ENSG00000067057	5214	PFKP	10	10p15.3-p15.2	phosphofructokinase, platelet	4836	1.02921	0.00062436	0.00808657
ENSG00000008323	55200	PLEKHG6	12	12p13.31	pleckstrin homology and RhoGEF domain containing G6	4260	1.02897	0.00237674	0.0207642
ENSG00000168993	10815	CPLX1	4	4p16.3	complexin 1	2418	1.02863	0.00306397	0.0250013
ENSG00000184194	54328	GPR173	X	Xp11	G protein-coupled receptor 173	4608	1.02801	0.00267439	0.022691
ENSG00000117632	3925	STMN1	1	1p36.11	stathmin 1	6261	1.02728	0.000567096	0.00751892
ENSG00000167617	148170	CDC42EP5	19	19q13.42	CDC42 effector protein (Rho GTPase binding) 5	903	1.02701	0.000820529	0.00962491
ENSG00000183508	54855	FAM46C	1	1p12	family with sequence similarity 46 member C	5751	1.02672	0.00323774	0.026076
ENSG00000185880	140691	TRIM69	15	15q21.1	tripartite motif containing 69	9265	1.0266	0.000869482	0.0100413
ENSG00000205726	6453	ITSN1	21	21q22.1-q22.2	intersectin 1	21748	1.02641	0.00217464	0.0194977
ENSG00000111727	29915	HCFC2	12	12q23.3	host cell factor C2	6773	1.02551	0.00669495	0.0435197
ENSG00000100276	10633	RASL10A	22	22q12.2	RAS-like family 10 member A	2240	1.02518	0.00612057	0.0410822
ENSG00000102243	51442	VGLL1	X	Xq26.3	vestigial like family member 1	1541	1.02518	0.00717387	0.0455782
ENSG00000004700	5965	RECQL	12	12p12	RecQ helicase-like	3778	1.02383	0.00335158	0.0265296
ENSG00000171729	55092	TMEM51	1	1p36.21	transmembrane protein 51	2240	1.02372	0.000845364	0.00986426
ENSG00000166839	348094	ANKDD1A	15	15q22.31	ankyrin repeat and death domain containing 1A	5042	1.02321	0.00445782	0.0323721
ENSG00000115380	2202	EFEMP1	2	2p16	EGF containing fibulin-like extracellular matrix protein 1	3962	1.02269	7.87e-05	0.00186195
ENSG00000073712	10979	FERMT2	14	14q22.1	fermitin family member 2	8510	1.02255	0.00609044	0.0409618
ENSG00000157502	139221	MUM1L1	X	Xq22.3	melanoma associated antigen (mutated) 1-like 1	4343	1.02091	0.00328714	0.026236
ENSG00000145246	57205	ATP10D	4	4p12	ATPase, class V, type 10D	7965	1.02088	0.00113152	0.0120806
ENSG00000181007	284406	ZFP82	19	19q13.12	ZFP82 zinc finger protein	7506	1.02085	0.00141833	0.0142908
ENSG00000198108	337876	CHSY3	5	5q23.3	chondroitin sulfate synthase 3	3938	1.02039	0.000264283	0.00447051
ENSG00000106665	7461	CLIP2	7	7q11.23	CAP-Gly domain containing linker protein 2	7315	1.01915	0.00230869	0.0203331
ENSG00000120280	80231	CXorf21	X	Xp21.2	chromosome X open reading frame 21	1855	1.01906	0.00810523	0.0497112
ENSG00000184384	84441	MAML2	11	11q21	mastermind like transcriptional coactivator 2	7109	1.01793	0.00699818	0.0448856
ENSG00000165379	145581	LRFN5	14	14q21.1	leucine rich repeat and fibronectin type III domain containing 5	6140	1.01784	0.00773244	0.0480175
ENSG00000188153	1287	COL4A5	X	Xq22	collagen, type IV, alpha 5	8738	1.01746	0.0043069	0.0315237
ENSG00000183134	11251	PTGDR2	11	11q12-q13.3	prostaglandin D2 receptor 2	2895	1.01738	0.00154079	0.0151904
ENSG00000124788	6310	ATXN1	6	6p23	ataxin 1	16487	1.01718	0.000824842	0.00965863
ENSG00000197928	342926	ZNF677	19	19q13.42	zinc finger protein 677	9348	1.0169	0.00496997	0.0349485
ENSG00000135736	92922	CCDC102A	16	16q21	coiled-coil domain containing 102A	2582	1.01679	0.00185314	0.0173689
ENSG00000068615	65055	REEP1	2	2p11.2	receptor accessory protein 1	5193	1.01618	0.00280259	0.0234966
ENSG00000122591	84668	FAM126A	7	7p15.3	family with sequence similarity 126 member A	14499	1.01604	0.00664884	0.0433843
ENSG00000106546	196	AHR	7	7p15	aryl hydrocarbon receptor	6661	1.01562	0.00239127	0.0208678
ENSG00000111801	10384	BTN3A3	6	6p21.3	butyrophilin subfamily 3 member A3	5658	1.01488	0.00152483	0.0151033
ENSG00000065357	1606	DGKA	12	12q13.3	diacylglycerol kinase alpha	10215	1.0125	0.00328914	0.026236
ENSG00000150760	1793	DOCK1	10	10q26.13-q26.3	dedicator of cytokinesis 1	8142	1.01217	0.00342263	0.0269566
ENSG00000130303	684	BST2	19	19p13.1	bone marrow stromal cell antigen 2	1119	1.01125	0.00212413	0.0191361
ENSG00000155016	113612	CYP2U1	4	4q25	cytochrome P450 family 2 subfamily U member 1	6096	1.01085	0.00162823	0.0158699
ENSG00000065534	4638	MYLK	3	3q21	myosin light chain kinase	22167	1.01046	0.00142813	0.0143788
ENSG00000101871	4281	MID1	X	Xp22	midline 1	9295	1.00898	0.00221219	0.0197159
ENSG00000156113	3778	KCNMA1	10	10q22.3	potassium channel, calcium activated large conductance subfamily M alpha, member 1	19248	1.00791	0.00462487	0.0330936
ENSG00000182175	56963	RGMA	15	15q26.1	repulsive guidance molecule family member a	13141	1.00496	0.00724048	0.0459362
ENSG00000152492	152137	CCDC50	3	3q28	coiled-coil domain containing 50	9202	1.00439	0.00356748	0.0276964
ENSG00000129680	79649	MAP7D3	X	Xq26.3	MAP7 domain containing 3	7067	1.0032	0.00787928	0.0487231
ENSG00000154217	26207	PITPNC1	17	17q24.2	phosphatidylinositol transfer protein, cytoplasmic 1	7819	1.00185	0.00334524	0.0265074
ENSG00000163346	57326	PBXIP1	1	1q21.3	pre-B-cell leukemia homeobox interacting protein 1	3851	1.00151	0.000708417	0.00874517
ENSG00000184731	642273	FAM110C	2	2p25.3	family with sequence similarity 110 member C	3968	1.0001	0.00262173	0.0223429
ENSG00000203697	388743	CAPN8	1	1q41	calpain 8	5192	-1.0064	0.00370526	0.0285351
ENSG00000128965	79094	CHAC1	15	15q15.1	ChaC glutathione-specific gamma-glutamylcyclotransferase 1	2058	-1.00646	0.00324421	0.026076
ENSG00000116133	1718	DHCR24	1	1p32.3	24-dehydrocholesterol reductase	4250	-1.01572	0.00414645	0.03064
ENSG00000166126	81693	AMN	14	14q32.3	amnion associated transmembrane protein	4646	-1.01757	0.00424949	0.0312149
ENSG00000139428	326625	MMAB	12	12q24	methylmalonic aciduria (cobalamin deficiency) cblB type	6290	-1.0219	0.000259565	0.00441853
ENSG00000165912	29763	PACSIN3	11	11p12-p11.12	protein kinase C and casein kinase substrate in neurons 3	2752	-1.02658	0.000180551	0.00346922
ENSG00000163220	6280	S100A9	1	1q21	S100 calcium binding protein A9	577	-1.03584	0.00319233	0.0258407
ENSG00000167536	147015	DHRS13	17	17q11.2	dehydrogenase/reductase (SDR family) member 13	2944	-1.04953	3.6e-05	0.00107565
ENSG00000186493	153571	C5orf38	5	5p15.33	chromosome 5 open reading frame 38	1925	-1.06304	0.00351232	0.0273314
ENSG00000177191	374907	B3GNT8	19	19q13.2	UDP-GlcNAc:betaGal beta-1,3-N-acetylglucosaminyltransferase 8	1874	-1.07487	0.0029011	0.0240231
ENSG00000187840	1978	EIF4EBP1	8	8p12	eukaryotic translation initiation factor 4E binding protein 1	1073	-1.07583	0.000299922	0.00481608
ENSG00000171119	4902	NRTN	19	19p13.3	neurturin	1109	-1.07691	0.00126478	0.0130772
ENSG00000005187	6296	ACSM3	16	16p13.11	acyl-CoA synthetase medium-chain family member 3	7822	-1.07911	0.000938827	0.0105695
ENSG00000114646	10675	CSPG5	3	3p21.3	chondroitin sulfate proteoglycan 5	4366	-1.08141	0.00346094	0.0271201
ENSG00000114248	79782	LRRC31	3	3q26.2	leucine rich repeat containing 31	3113	-1.09896	0.0072759	0.0461173
ENSG00000157992	200634	KRTCAP3	2	2p23.3	keratinocyte associated protein 3	1403	-1.10102	0.00134162	0.013694
ENSG00000171747	3960	LGALS4	19	19q13.2	lectin, galactoside-binding, soluble, 4	2645	-1.10976	0.000851284	0.00989066
ENSG00000107242	8395	PIP5K1B	9	9q13	phosphatidylinositol-4-phosphate 5-kinase, type I, beta	4918	-1.1112	0.00476359	0.0338377
ENSG00000134463	79746	ECHDC3	10	10p14	enoyl-CoA hydratase domain containing 3	2185	-1.11531	0.000284842	0.00466883
ENSG00000135069	29968	PSAT1	9	9q21.2	phosphoserine aminotransferase 1	2188	-1.12397	0.00541115	0.0374432
ENSG00000124839	64284	RAB17	2	2q37.3	RAB17, member RAS oncogene family	4783	-1.12506	0.00102929	0.0112576
ENSG00000159166	3898	LAD1	1	1q25.1-q32.3	ladinin 1	3482	-1.1254	0.00122639	0.0128184
ENSG00000162366	10158	PDZK1IP1	1	1p33	PDZK1 interacting protein 1	1438	-1.13661	0.000330016	0.0052024
ENSG00000174669	3177	SLC29A2	11	11q13	solute carrier family 29 (equilibrative nucleoside transporter), member 2	2720	-1.14695	0.000899519	0.0103084
ENSG00000171433	392465	GLOD5	X	Xp11.23	glyoxalase domain containing 5	1061	-1.15339	0.0018036	0.0170953
ENSG00000157399	415	ARSE	X	Xp22.3	arylsulfatase E (chondrodysplasia punctata 1)	2878	-1.15391	0.00179513	0.0170875
ENSG00000151726	2180	ACSL1	4	4q35.1	acyl-CoA synthetase long-chain family member 1	6284	-1.1552	0.00271751	0.0229697
ENSG00000161243	126433	FBXO27	19	19q13.2	F-box protein 27	2833	-1.15661	0.000231507	0.00407123
ENSG00000117308	2582	GALE	1	1p36-p35	UDP-galactose-4-epimerase	3978	-1.16227	0.000318191	0.00505755
ENSG00000123405	4778	NFE2	12	12q13	nuclear factor, erythroid 2	2469	-1.16796	0.0019764	0.018219
ENSG00000111319	6337	SCNN1A	12	12p13	sodium channel, non voltage gated 1 alpha subunit	5876	-1.17045	0.00434956	0.031758
ENSG00000065621	119391	GSTO2	10	10q25.1	glutathione S-transferase omega 2	9921	-1.17435	0.000244773	0.00423652
ENSG00000181019	1728	NQO1	16	16q22.1	NAD(P)H dehydrogenase, quinone 1	3254	-1.18265	0.00304617	0.0248863
ENSG00000154146	4900	NRGN	11	11q24	neurogranin	1309	-1.184	0.00786547	0.0486825
ENSG00000160285	4047	LSS	21	21q22.3	lanosterol synthase (2,3-oxidosqualene-lanosterol cyclase)	7238	-1.18516	0.000181789	0.00347312
ENSG00000168004	117245	HRASLS5	11	11q13.2	HRAS like suppressor family member 5	3268	-1.18693	0.000513444	0.00694467
ENSG00000132702	60484	HAPLN2	1	1q23.1	hyaluronan and proteoglycan link protein 2	2241	-1.19697	0.0064641	0.0426686
ENSG00000152128	81615	TMEM163	2	2q21.3	transmembrane protein 163	6804	-1.19827	0.00391614	0.0295991
ENSG00000188493	284325	C19orf54	19	19q13.2	chromosome 19 open reading frame 54	3375	-1.19975	0.000411508	0.00604673
ENSG00000114771	13	AADAC	3	3q25.1	arylacetamide deacetylase	1668	-1.20366	0.0030453	0.0248863
ENSG00000100116	23464	GCAT	22	22q13.1	glycine C-acetyltransferase	2104	-1.20973	0.000496054	0.00679154
ENSG00000078070	56922	MCCC1	3	3q27	methylcrotonoyl-CoA carboxylase 1	4321	-1.23206	0.000102476	0.0022901
ENSG00000105501	8778	SIGLEC5	19	19q13.3	sialic acid binding Ig-like lectin 5	2784	-1.23916	0.00664182	0.0433843
ENSG00000189221	4128	MAOA	X	Xp11.3	monoamine oxidase A	5528	-1.23936	0.000824387	0.00965863
ENSG00000185499	4582	MUC1	1	1q21	mucin 1, cell surface associated	4717	-1.25076	0.00426849	0.0313108
ENSG00000162551	249	ALPL	1	1p36.12	alkaline phosphatase, liver/bone/kidney	3007	-1.2588	0.00107923	0.0116802
ENSG00000268104	11254	SLC6A14	X	Xq23	solute carrier family 6 (amino acid transporter), member 14	4520	-1.26237	0.00290068	0.0240231
ENSG00000131386	117248	GALNT15	3	3p25.1	polypeptide N-acetylgalactosaminyltransferase 15	5679	-1.26513	0.00802627	0.0494046
ENSG00000115648	79083	MLPH	2	2q37.3	melanophilin	7514	-1.2683	0.00109737	0.0118217
ENSG00000163817	54716	SLC6A20	3	3p21.3	solute carrier family 6 (proline IMINO transporter), member 20	6651	-1.27863	0.00148336	0.0147907
ENSG00000261701	3250	HPR	16	16q22.1	haptoglobin-related protein	1610	-1.27961	0.00148726	0.0148185
ENSG00000181392	163183	SYNE4	19	19q13.12	spectrin repeat containing, nuclear envelope family member 4	2528	-1.2808	5.79e-05	0.00152565
ENSG00000137709	25833	POU2F3	11	11q23.3	POU class 2 homeobox 3	6645	-1.28927	0.000157056	0.0031297
ENSG00000176092	55057	AIM1L	1	1p36.11	absent in melanoma 1-like	5871	-1.29236	0.00410779	0.0304816
ENSG00000163251	7855	FZD5	2	2q33.3	frizzled class receptor 5	6708	-1.29302	0.00110683	0.0119022
ENSG00000133134	84707	BEX2	X	Xq22	brain expressed X-linked 2	1176	-1.29859	0.000140915	0.00288744
ENSG00000186205	64757	2021-03-01	1	1q41	mitochondrial amidoxime reducing component 1	9258	-1.29873	3.32e-05	0.00101607
ENSG00000136014	84101	USP44	12	12q22	ubiquitin specific peptidase 44	5386	-1.3096	0.00364583	0.0281582
ENSG00000166278	717	C2	6	6p21.3	complement component 2	5536	-1.31001	0.000190843	0.00356498
ENSG00000204334	285141	ERICH2	2	2q31.1	glutamate rich 2	601	-1.31477	0.000513375	0.00694467
ENSG00000140961	29948	OSGIN1	16	16q23.3	oxidative stress induced growth inhibitor 1	3460	-1.32064	0.00021842	0.00391668
ENSG00000062282	84649	DGAT2	11	11q13.5	diacylglycerol O-acyltransferase 2	7905	-1.32744	3.21e-05	0.000991406
ENSG00000113924	3081	HGD	3	3q13.33	homogentisate 1,2-dioxygenase	2983	-1.33138	0.000164408	0.00323304
ENSG00000174567	127845	GOLT1A	1	1q32.1	golgi transport 1A	1136	-1.33178	0.000267327	0.00448457
ENSG00000138821	64116	SLC39A8	4	4q24	solute carrier family 39 (zinc transporter), member 8	6480	-1.33897	0.00485987	0.0343723
ENSG00000131069	55902	ACSS2	20	20q11.22	acyl-CoA synthetase short-chain family member 2	5385	-1.34306	4.6e-05	0.00127712
ENSG00000241935	112817	HOGA1	10	10q24.2	4-hydroxy-2-oxoglutarate aldolase 1	4148	-1.34958	0.0003907	0.00586968
ENSG00000167644	64073	C19orf33	19	19q13.2	chromosome 19 open reading frame 33	617	-1.3578	0.00779298	0.0483453
ENSG00000174899	152078	PQLC2L	3	3q25.32	PQ loop repeat containing 2-like	3180	-1.36792	0.000520607	0.00702741
ENSG00000151364	65987	KCTD14	11	11q14.1	potassium channel tetramerization domain containing 14	1917	-1.36961	7e-05	0.00171432
ENSG00000270885	91608	RASL10B	17	17q12	RAS-like family 10 member B	3502	-1.37496	0.000308202	0.00493969
ENSG00000014257	55	ACPP	3	3q22.1	acid phosphatase, prostate	4193	-1.37821	5.51e-06	0.000291199
ENSG00000138111	79847	MFSD13A	10	10q24.32	major facilitator superfamily domain containing 13A	3526	-1.37989	0.000157403	0.00313196
ENSG00000149516	932	MS4A3	11	11q12.1	membrane-spanning 4-domains, subfamily A, member 3 (hematopoietic cell-specific)	2095	-1.38648	0.0011948	0.0125861
ENSG00000025423	8630	HSD17B6	12	12q13	hydroxysteroid (17-beta) dehydrogenase 6	2272	-1.39338	0.00747841	0.0469421
ENSG00000211445	2878	GPX3	5	5q33.1	glutathione peroxidase 3	3163	-1.39365	0.000454998	0.00644629
ENSG00000170549	79192	IRX1	5	5p15.3	iroquois homeobox 1	1858	-1.40096	0.00198071	0.0182326
ENSG00000253313	149466	C1orf210	1	1p34.2	chromosome 1 open reading frame 210	1516	-1.40426	0.00149157	0.0148486
ENSG00000162896	5284	PIGR	1	1q31-q41	polymeric immunoglobulin receptor	4376	-1.40576	0.000607806	0.00793709
ENSG00000052802	6307	MSMO1	4	4q32-q34	methylsterol monooxygenase 1	2892	-1.4126	0.000402864	0.00594601
ENSG00000064270	9914	ATP2C2	16	16q24.1	ATPase, Ca++ transporting, type 2C, member 2	7352	-1.41569	0.0011959	0.0125879
ENSG00000182902	83733	SLC25A18	22	22q11.2	solute carrier family 25 (glutamate carrier), member 18	4741	-1.41896	0.00577725	0.0393082
ENSG00000172893	1717	DHCR7	11	11q13.4	7-dehydrocholesterol reductase	4160	-1.42535	0.000251192	0.00431979
ENSG00000184454	400746	NCMAP	1	1p36.11	non-compact myelin associated protein	4122	-1.43536	0.000461658	0.00650632
ENSG00000147872	123	PLIN2	9	9p22.1	perilipin 2	5086	-1.43829	0.000321306	0.00508898
ENSG00000112972	3157	HMGCS1	5	5p14-p13	3-hydroxy-3-methylglutaryl-CoA synthase 1	4702	-1.43952	0.000687515	0.00860334
ENSG00000092621	26227	PHGDH	1	1p12	phosphoglycerate dehydrogenase	5622	-1.44191	0.00020275	0.00373543
ENSG00000149435	92086	GGTLC1	20	20p11.1	gamma-glutamyltransferase light chain 1	1279	-1.44498	0.00736312	0.0464509
ENSG00000118137	335	APOA1	11	11q23-q24	apolipoprotein A-I	1424	-1.44693	0.00462278	0.0330936
ENSG00000161267	622	BDH1	3	3q29	3-hydroxybutyrate dehydrogenase, type 1	9114	-1.4505	2.89e-05	0.000927569
ENSG00000076826	57662	CAMSAP3	19	19p13.2	calmodulin regulated spectrin associated protein family member 3	4845	-1.45942	0.000143261	0.00292422
ENSG00000105352	1089	CEACAM4	19	19q13.2	carcinoembryonic antigen-related cell adhesion molecule 4	1364	-1.46355	0.00226762	0.0200163
ENSG00000131400	9476	NAPSA	19	19q13.33	napsin A aspartic peptidase	3581	-1.48509	0.0049066	0.0346662
ENSG00000090013	645	BLVRB	19	19q13.1-q13.2	biliverdin reductase B	1665	-1.49621	6.01e-06	0.000306833
ENSG00000145248	201780	SLC10A4	4	4p11	solute carrier family 10 member 4	1790	-1.5091	0.000675388	0.00850172
ENSG00000085831	22996	TTC39A	1	1p32.3	tetratricopeptide repeat domain 39A	9362	-1.50975	0.000230399	0.00407001
ENSG00000133328	54979	HRASLS2	11	11q12.3	HRAS-like suppressor 2	742	-1.53485	0.00690987	0.0444688
ENSG00000196408	124056	NOXO1	16	16p13.3	NADPH oxidase organizer 1	2159	-1.54088	0.00222909	0.0198008
ENSG00000005381	4353	MPO	17	17q23.1	myeloperoxidase	3526	-1.54755	9.36e-05	0.0021277
ENSG00000189334	57402	S100A14	1	1q21.3	S100 calcium binding protein A14	1277	-1.55335	2.48e-05	0.000831506
ENSG00000103876	2184	FAH	15	15q25.1	fumarylacetoacetate hydrolase (fumarylacetoacetase)	7063	-1.57043	5.42e-06	0.000287974
ENSG00000153093	55289	ACOXL	2	2q13	acyl-CoA oxidase-like	5747	-1.58009	0.00040521	0.00597407
ENSG00000163492	285025	CCDC141	2	2q31.2	coiled-coil domain containing 141	15446	-1.58201	0.00479713	0.0340061
ENSG00000160606	116238	TLCD1	17	17q11.2	TLC domain containing 1	1311	-1.58296	6.59e-05	0.00164784
ENSG00000163958	131540	ZDHHC19	3	3q29	zinc finger, DHHC-type containing 19	2432	-1.58319	0.000814685	0.00957308
ENSG00000176974	6470	SHMT1	17	17p11.2	serine hydroxymethyltransferase 1 (soluble)	7281	-1.58867	6.47e-07	6.95e-05
ENSG00000155897	114	ADCY8	8	8q24	adenylate cyclase 8 (brain)	5961	-1.59533	0.000991697	0.0109561
ENSG00000149809	7108	TM7SF2	11	11q13	transmembrane 7 superfamily member 2	3408	-1.6029	8.13e-05	0.00189826
ENSG00000187094	885	CCK	3	3p22.1	cholecystokinin	2085	-1.61716	0.00186844	0.0174634
ENSG00000166415	256764	WDR72	15	15q21.3	WD repeat domain 72	8572	-1.62863	3.37e-05	0.00102536
ENSG00000116761	1491	CTH	1	1p31.1	cystathionine gamma-lyase	2414	-1.64343	8.26e-06	0.000387735
ENSG00000008394	4257	MGST1	12	12p12.3-p12.1	microsomal glutathione S-transferase 1	7440	-1.65272	1.68e-06	0.000131035
ENSG00000120907	148	ADRA1A	8	8p21.2	adrenoceptor alpha 1A	5848	-1.6541	0.00390511	0.0295904
ENSG00000171124	2525	FUT3	19	19p13.3	fucosyltransferase 3 (Lewis blood group)	3109	-1.65699	1.19e-05	0.000497766
ENSG00000169738	51181	DCXR	17	17q25.3	dicarbonyl/L-xylulose reductase	1902	-1.66477	1.15e-05	0.000486143
ENSG00000138162	10579	TACC2	10	10q26	transforming, acidic coiled-coil containing protein 2	18844	-1.676	0.000525583	0.00707325
ENSG00000173930	353189	SLCO4C1	5	5q21.2	solute carrier organic anion transporter family member 4C1	5334	-1.68046	0.00438414	0.0319324
ENSG00000105707	3249	HPN	19	19q13.12	hepsin	3380	-1.6883	0.00115353	0.0122572
ENSG00000168389	84879	MFSD2A	1	1p34.2	major facilitator superfamily domain containing 2A	4007	-1.69022	0.000738739	0.00897494
ENSG00000144331	151126	ZNF385B	2	2q31.2-q31.3	zinc finger protein 385B	5310	-1.69419	0.00147102	0.0146895
ENSG00000187486	3767	KCNJ11	11	11p15.1	potassium channel, inwardly rectifying subfamily J, member 11	3204	-1.74209	0.000635161	0.00816016
ENSG00000138308	84647	PLA2G12B	10	10q22.1	phospholipase A2 group XIIB	1128	-1.74437	0.00186985	0.0174645
ENSG00000196260	389376	SFTA2	6	6p21.33	surfactant associated 2	1204	-1.74442	9.42e-05	0.0021364
ENSG00000156510	80201	HKDC1	10	10q22.1	hexokinase domain containing 1	4259	-1.76987	5.5e-05	0.00146152
ENSG00000119535	1441	CSF3R	1	1p35-p34.3	colony stimulating factor 3 receptor	8429	-1.77296	5.91e-05	0.001537
ENSG00000100292	3162	HMOX1	22	22q13.1	heme oxygenase 1	2405	-1.77819	0.000152176	0.00305512
ENSG00000124134	3787	KCNS1	20	20q12	potassium voltage-gated channel, modifier subfamily S, member 1	4538	-1.79156	0.00138144	0.013961
ENSG00000177575	9332	CD163	12	12p13.3	CD163 molecule	5813	-1.79222	0.000197015	0.0036599
ENSG00000106927	259	AMBP	9	9q32-q33	alpha-1-microglobulin/bikunin precursor	2041	-1.79818	9.87e-06	0.000435027
ENSG00000009950	51085	MLXIPL	7	7q11.23	MLX interacting protein-like	4815	-1.80728	7.2e-05	0.00174205
ENSG00000078081	27074	LAMP3	3	3q26.3-q27	lysosomal-associated membrane protein 3	3816	-1.81185	0.00210971	0.0190683
ENSG00000122852	653509	SFTPA1	10	10q22.3	surfactant protein A1	2451	-1.82215	0.00358196	0.0277767
ENSG00000101255	57761	TRIB3	20	20p13-p12.2	tribbles pseudokinase 3	3434	-1.82515	4.59e-05	0.00127685
ENSG00000254521	89858	SIGLEC12	19	19q13.4	sialic acid binding Ig-like lectin 12 (gene/pseudogene)	2201	-1.8413	0.00254441	0.0218364
ENSG00000101187	28231	SLCO4A1	20	20q13.33	solute carrier organic anion transporter family member 4A1	4051	-1.85745	0.00244399	0.0211912
ENSG00000159387	79190	IRX6	16	16q12.2	iroquois homeobox 6	3399	-1.86166	3.65e-06	0.000221604
ENSG00000169174	255738	PCSK9	1	1p32.3	proprotein convertase subtilisin/kexin type 9	4981	-1.90048	0.000682496	0.00856692
ENSG00000124102	5266	PI3	20	20q13.12	peptidase inhibitor 3	577	-1.90472	0.00175084	0.016737
ENSG00000124713	27232	GNMT	6	6p12	glycine N-methyltransferase	1072	-1.93399	0.000197646	0.0036615
ENSG00000140254	90527	DUOXA1	15	15q21.1	dual oxidase maturation factor 1	3721	-1.95013	4.14e-05	0.00118445
ENSG00000133661	6441	SFTPD	10	10q22.2-q23.1	surfactant protein D	1321	-1.96919	0.00109473	0.0118099
ENSG00000164879	761	CA3	8	8q21.2	carbonic anhydrase III	2310	-1.97203	0.000452855	0.00642269
ENSG00000102104	6247	RS1	X	Xp22.13	retinoschisin 1	3485	-2.00917	0.00128085	0.0131926
ENSG00000091583	350	APOH	17	17q24.2	apolipoprotein H	1332	-2.01118	0.000478654	0.00665508
ENSG00000081479	4036	LRP2	2	2q31.1	LDL receptor related protein 2	16260	-2.01465	0.0045365	0.0327052
ENSG00000168878	6439	SFTPB	2	2p12-p11.2	surfactant protein B	4110	-2.02091	0.000844943	0.00986426
ENSG00000006606	10344	CCL26	7	7q11.23	chemokine (C-C motif) ligand 26	706	-2.03768	0.0012395	0.0129108
ENSG00000131781	2330	FMO5	1	1q21.1	flavin containing monooxygenase 5	5986	-2.06328	0.000266985	0.00448457
ENSG00000169710	2194	FASN	17	17q25	fatty acid synthase	9067	-2.07754	0.000347889	0.00541425
ENSG00000124107	6590	SLPI	20	20q12	secretory leukocyte peptidase inhibitor	596	-2.10255	0.000174226	0.00338268
ENSG00000181577	221416	C6orf223	6	6p21.1	chromosome 6 open reading frame 223	3917	-2.10276	2.59e-05	0.000856037
ENSG00000167972	21	ABCA3	16	16p13.3	ATP binding cassette subfamily A member 3	7804	-2.1217	0.00197903	0.0182307
ENSG00000185303	729238	SFTPA2	10	10q22.3	surfactant protein A2	2685	-2.12439	0.00618654	0.0413802
ENSG00000167711	5345	SERPINF2	17	17p13	serpin peptidase inhibitor, clade F (alpha-2 antiplasmin, pigment epithelium derived factor), member 2	2348	-2.14388	2.28e-07	3.87e-05
ENSG00000006071	6833	ABCC8	11	11p15.1	ATP binding cassette subfamily C member 8	6778	-2.14824	0.00345082	0.0271041
ENSG00000109084	27346	TMEM97	17	17q11.2	transmembrane protein 97	3034	-2.15728	8.48e-07	8.34e-05
ENSG00000102837	10562	OLFM4	13	13q14.3	olfactomedin 4	2897	-2.16877	0.000198182	0.00366637
ENSG00000168481	203190	LGI3	8	8p21.3	leucine-rich repeat LGI family member 3	4514	-2.19018	0.00703103	0.0449685
ENSG00000171711	1673	DEFB4A	8	8p23.1	defensin beta 4A	380	-2.20437	0.00638477	0.0423794
ENSG00000214456	440503	PLIN5	19	19p13.3	perilipin 5	4815	-2.22261	4.32e-08	1.75e-05
ENSG00000164400	1437	CSF2	5	5q31.1	colony stimulating factor 2 (granulocyte-macrophage)	787	-2.23327	0.000114608	0.00249857
ENSG00000165887	26287	ANKRD2	10	10q23	ankyrin repeat domain 2 (stretch responsive muscle)	1451	-2.2924	8.6e-06	0.000396974
ENSG00000168631	135656	DPCR1	6	6p21.33	diffuse panbronchiolitis critical region 1	5314	-2.30791	0.000141244	0.00288744
ENSG00000169397	6037	RNASE3	14	14q11.2	ribonuclease, RNase A family, 3	720	-2.33046	8.51e-06	0.000396901
ENSG00000137857	53905	DUOX1	15	15q15.3	dual oxidase 1	8784	-2.3362	4.1e-05	0.00117822
ENSG00000168907	255189	PLA2G4F	15	15q15.1	phospholipase A2 group IVF	6103	-2.35035	0.00360122	0.0278618
ENSG00000144908	10840	ALDH1L1	3	3q21.3	aldehyde dehydrogenase 1 family member L1	13712	-2.35568	0.00332534	0.0263808
ENSG00000123119	64168	NECAB1	8	8q21.3	N-terminal EF-hand calcium binding protein 1	6408	-2.36369	7.33e-05	0.00177088
ENSG00000144285	6323	SCN1A	2	2q24.3	sodium channel, voltage gated, type I alpha subunit	9312	-2.36594	0.000739058	0.00897494
ENSG00000179593	247	ALOX15B	17	17p13.1	arachidonate 15-lipoxygenase, type B	3028	-2.38122	0.000727303	0.00886426
ENSG00000150201	53828	FXYD4	10	10q11.21	FXYD domain containing ion transport regulator 4	827	-2.38561	0.00020955	0.00380848
ENSG00000166961	219995	MS4A15	11	11q12.2	membrane-spanning 4-domains, subfamily A, member 15	2195	-2.52198	0.0055509	0.0380781
ENSG00000134020	157310	PEBP4	8	8p21.3	phosphatidylethanolamine binding protein 4	1329	-2.53298	4.31e-05	0.0012219
ENSG00000132429	64208	POPDC3	6	6q21	popeye domain containing 3	1881	-2.55206	6.63e-05	0.00165552
ENSG00000100078	50487	PLA2G3	22	22q12.2	phospholipase A2 group III	2697	-2.56827	1.29e-07	2.82e-05
ENSG00000182931	280664	WFDC10B	20	20q13.12	WAP four-disulfide core domain 10B	630	-2.61521	1.29e-07	2.82e-05
ENSG00000115009	6364	CCL20	2	2q36.3	chemokine (C-C motif) ligand 20	1343	-2.64949	0.000311435	0.00497369
ENSG00000129988	3929	LBP	20	20q11.23	lipopolysaccharide binding protein	1961	-2.66371	5.42e-06	0.000287974
ENSG00000160862	563	AZGP1	7	7q22.1	alpha-2-glycoprotein 1, zinc-binding	2699	-2.72186	0.000382556	0.00578616
ENSG00000196415	5657	PRTN3	19	19p13.3	proteinase 3	1146	-2.74588	6.31e-06	0.000314538
ENSG00000169385	6036	RNASE2	14	14q11.2	ribonuclease, RNase A family, 2 (liver, eosinophil-derived neurotoxin)	755	-2.76465	2.08e-07	3.74e-05
ENSG00000095713	55118	CRTAC1	10	10q22	cartilage acidic protein 1	3553	-2.78304	0.00107122	0.0116122
ENSG00000257017	3240	HP	16	16q22.2	haptoglobin	5405	-2.81137	0.000134068	0.0027831
ENSG00000115590	7850	IL1R2	2	2q12	interleukin 1 receptor, type II	3073	-2.8257	5.19e-06	0.000283149
ENSG00000170890	5319	PLA2G1B	12	12q24.31	phospholipase A2 group IB	638	-2.83078	0.00013386	0.00278309
ENSG00000228278	5005	ORM2	9	9q32	orosomucoid 2	760	-2.93991	1.87e-06	0.000141759
ENSG00000160200	875	CBS	21	21q22.3	cystathionine-beta-synthase	6786	-2.99077	9.77e-08	2.53e-05
ENSG00000171560	2243	FGA	4	4q28	fibrinogen alpha chain	3956	-3.0089	0.00171079	0.0164479
ENSG00000163283	250	ALPP	2	2q37	alkaline phosphatase, placental	3059	-3.05153	0.00014525	0.00296032
ENSG00000164821	1669	DEFA4	8	8p23	defensin alpha 4	617	-3.24238	0.000710326	0.00875767
ENSG00000152463	55301	OLAH	10	10p13	oleoyl-ACP hydrolase	2364	-3.24314	6.8e-07	7.19e-05
ENSG00000173432	6288	SAA1	11	11p15.1	serum amyloid A1	765	-3.24351	0.000230474	0.00407001
ENSG00000175206	4878	NPPA	1	1p36.21	natriuretic peptide A	1120	-3.25004	3.23e-07	4.69e-05
ENSG00000141744	5409	PNMT	17	17q12	phenylethanolamine N-methyltransferase	1457	-3.26897	1.36e-05	0.000551141
ENSG00000100033	5625	PRODH	22	22q11.21	proline dehydrogenase (oxidase) 1	8776	-3.3218	1.75e-06	0.000134591
ENSG00000239839	1668	DEFA3	8	8p23.1	defensin alpha 3	658	-3.335	0.00224658	0.019878
ENSG00000096088	5225	PGC	6	6p21.1	progastricsin (pepsinogen C)	2025	-3.43538	6.35e-05	0.00161287
ENSG00000157150	7079	TIMP4	3	3p25	TIMP metallopeptidase inhibitor 4	1650	-3.49438	4.04e-06	0.000235495
ENSG00000229314	5004	ORM1	9	9q32	orosomucoid 1	901	-3.54853	4.02e-06	0.000235495
ENSG00000168703	128488	WFDC12	20	20q13.12	WAP four-disulfide core domain 12	775	-3.55617	2.2e-05	0.000779205
ENSG00000104760	2267	FGL1	8	8p22	fibrinogen like 1	3301	-4.03429	6.56e-08	2.26e-05

## Sheet: DEG (IPF.P vs CTR.P)
Ensembl ID	NCBI Gene ID	Gene Symbol	chr	chr.band	Description	Length	LogFoldChange	P.Value	adj.P.Val
ENSG00000188293	374918	IGFL1	19	19q13.32	IGF like family member 1	769	7.26782	1.13e-09	3.23e-07
ENSG00000137745	4322	MMP13	11	11q22.3	matrix metallopeptidase 13	2834	6.96016	2.49e-13	1.11e-09
ENSG00000181617	260436	FDCSP	4	4q13|4q13	follicular dendritic cell secreted protein	566	6.7954	9.86e-09	1.49e-06
ENSG00000186847	3861	KRT14	17	17q21.2	keratin 14, type I	2281	6.19169	1.88e-08	2.15e-06
ENSG00000167656	8581	LY6D	8	8q24	lymphocyte antigen 6 complex, locus D	1553	6.08871	2.21e-06	6.12e-05
ENSG00000196611	4312	MMP1	11	11q22.3	matrix metallopeptidase 1	1970	5.99067	2.06e-05	0.00032344
ENSG00000137673	4316	MMP7	11	11q22.2	matrix metallopeptidase 7	2323	5.78515	1.88e-13	1.11e-09
ENSG00000263639	4477	MSMB	10	10q11.2	microseminoprotein, beta-	492	5.54015	0.000678927	0.00469067
ENSG00000169469	6699	SPRR1B	1	1q21-q22	small proline-rich protein 1B	620	5.50548	2.26e-07	1.23e-05
ENSG00000138271	53836	GPR87	3	3q24	G protein-coupled receptor 87	1698	5.4027	3.8e-08	3.34e-06
ENSG00000165376	9075	CLDN2	X	Xq22.3-q23	claudin 2	3410	5.36294	6.17e-08	4.82e-06
ENSG00000275896	5645	PRSS2	7	7q34	protease, serine 2	1716	5.33538	5.74e-07	2.32e-05
ENSG00000211448	1734	DIO2	14	14q24.2-q24.3	deiodinase, iodothyronine, type II	7494	5.23655	1.17e-10	8.23e-08
ENSG00000158477	909	CD1A	1	1q23.1	CD1a molecule	2096	5.21435	2.48e-09	5.58e-07
ENSG00000170373	1469	CST1	20	20p11.21	cystatin SN	872	5.17628	0.000278545	0.00231793
ENSG00000205076	3963	LGALS7	19	19q13.2	lectin, galactoside-binding, soluble, 7	795	4.90375	6.4e-05	0.000742451
ENSG00000123500	1300	COL10A1	6	6q21-q22	collagen, type X, alpha 1	3816	4.87482	1.05e-06	3.5e-05
ENSG00000206075	5268	SERPINB5	18	18q21.33	serpin peptidase inhibitor, clade B (ovalbumin), member 5	3939	4.87379	6.71e-06	0.000143489
ENSG00000204866	147920	IGFL2	19	19q13.32	IGF like family member 2	2426	4.87075	1.07e-11	2.86e-08
ENSG00000186081	3852	KRT5	12	12q13.13	keratin 5, type II	4292	4.86145	7.95e-05	0.000884038
ENSG00000065618	1308	COL17A1	10	10q24.3	collagen, type XVII, alpha 1	6426	4.82237	1.04e-08	1.51e-06
ENSG00000125999	92747	BPIFB1	20	20q11.21	BPI fold containing family B member 1	3101	4.75568	8.47e-05	0.0009239
ENSG00000057149	6317	SERPINB3	18	18q21.3	serpin peptidase inhibitor, clade B (ovalbumin), member 3	2182	4.73754	0.000238845	0.0020511
ENSG00000123496	3598	IL13RA2	X	Xq23	interleukin 13 receptor subunit alpha 2	1626	4.6923	4.96e-10	1.9e-07
ENSG00000019186	1591	CYP24A1	20	20q13	cytochrome P450 family 24 subfamily A member 1	3972	4.67205	2.41e-07	1.27e-05
ENSG00000166670	4319	MMP10	11	11q22.3	matrix metallopeptidase 10	1758	4.6675	5.4e-07	2.23e-05
ENSG00000104140	171177	RHOV	15	15q13.3	ras homolog family member V	1705	4.66695	5.85e-07	2.35e-05
ENSG00000186832	3868	KRT16	17	17q21.2	keratin 16, type I	2475	4.64457	5.41e-10	1.96e-07
ENSG00000078898	80341	BPIFB2	20	20q11.21	BPI fold containing family B member 2	1898	4.57904	1.58e-05	0.000268832
ENSG00000134258	79679	VTCN1	1	1p13.1	V-set domain containing T cell activation inhibitor 1	3027	4.57404	1.43e-07	8.81e-06
ENSG00000116031	50489	CD207	2	2p13	CD207 molecule, langerin	1869	4.49785	1.44e-05	0.000251501
ENSG00000164694	84624	FNDC1	6	6q25	fibronectin type III domain containing 1	6854	4.38252	1.97e-08	2.2e-06
ENSG00000172156	6356	CCL11	17	17q12	chemokine (C-C motif) ligand 11	1079	4.36248	2.63e-10	1.26e-07
ENSG00000167165	54578	UGT1A6	2	2q37	UDP glucuronosyltransferase 1 family, polypeptide A6	5180	4.33555	3.45e-07	1.64e-05
ENSG00000120332	63923	TNN	1	1q23-q24	tenascin N	5008	4.33121	2.3e-08	2.43e-06
ENSG00000170369	1470	CST2	20	20p11.21	cystatin SA	748	4.32906	6.17e-08	4.82e-06
ENSG00000125869	24141	LAMP5	20	20p12	lysosomal associated membrane protein family member 5	2042	4.31236	3.2e-10	1.48e-07
ENSG00000131746	84951	TNS4	17	17q21.2	tensin 4	4847	4.29554	8.96e-08	6.3e-06
ENSG00000138316	140766	ADAMTS14	10	10q21	ADAM metallopeptidase with thrombospondin type 1 motif 14	5269	4.29353	2.39e-11	4.1e-08
ENSG00000086570	2196	FAT2	5	5q33.1	FAT atypical cadherin 2	14537	4.28726	4.83e-06	0.000111745
ENSG00000134757	1830	DSG3	18	18q12.1	desmoglein 3	5525	4.27819	2.32e-05	0.000349431
ENSG00000102962	6367	CCL22	16	16q13	chemokine (C-C motif) ligand 22	2929	4.23401	3.38e-10	1.51e-07
ENSG00000183908	219527	LRRC55	11	11q12.1	leucine rich repeat containing 55	5410	4.2309	1.12e-08	1.59e-06
ENSG00000099953	4320	MMP11	22	22q11.23	matrix metallopeptidase 11	5176	4.1781	1.77e-08	2.05e-06
ENSG00000145423	6423	SFRP2	4	4q31.3	secreted frizzled-related protein 2	2032	4.16958	5.3e-09	9.62e-07
ENSG00000197641	5275	SERPINB13	18	18q21.33	serpin peptidase inhibitor, clade B (ovalbumin), member 13	4535	4.15618	1.2e-05	0.00021899
ENSG00000099937	3053	SERPIND1	22	22q11.21	serpin peptidase inhibitor, clade D (heparin cofactor), member 1	2553	4.15174	7.31e-07	2.75e-05
ENSG00000137648	56649	TMPRSS4	11	11q23.3	transmembrane protease, serine 4	9948	4.14963	1.02e-06	3.44e-05
ENSG00000196754	6273	S100A2	1	1q21	S100 calcium binding protein A2	1567	4.14466	3.97e-06	9.58e-05
ENSG00000136881	570	BAAT	9	9q22.3	bile acid-CoA:amino acid N-acyltransferase	3389	4.11052	2.16e-10	1.08e-07
ENSG00000206073	6318	SERPINB4	18	18q21.3	serpin peptidase inhibitor, clade B (ovalbumin), member 4	2013	4.10556	1.59e-05	0.000270229
ENSG00000165474	2706	GJB2	13	13q11-q12	gap junction protein beta 2	2427	4.07435	4.97e-11	5.24e-08
ENSG00000143320	1382	CRABP2	1	1q21.3	cellular retinoic acid binding protein 2	1100	4.05355	1.25e-13	1.11e-09
ENSG00000128422	3872	KRT17	17	17q21.2	keratin 17, type I	2537	4.05253	3.43e-06	8.41e-05
ENSG00000198183	51297	BPIFA1	20	20q11.2	BPI fold containing family A member 1	1081	4.00228	0.00403895	0.019878
ENSG00000145824	9547	CXCL14	5	5q31	chemokine (C-X-C motif) ligand 14	1975	4.00131	3.36e-07	1.62e-05
ENSG00000165246	22829	NLGN4Y	Y	Yq11.221	neuroligin 4, Y-linked	8206	3.99091	2.83e-05	0.000405997
ENSG00000170290	6588	SLN	11	11q22.3	sarcolipin	906	3.98632	1.51e-10	8.85e-08
ENSG00000135925	80326	WNT10A	2	2q35	wingless-type MMTV integration site family member 10A	3412	3.9823	3.72e-10	1.56e-07
ENSG00000106819	54829	ASPN	9	9q22	asporin	2470	3.98085	4.34e-08	3.64e-06
ENSG00000117215	26279	PLA2G2D	1	1p36.12	phospholipase A2 group IID	2681	3.94125	3.13e-06	7.82e-05
ENSG00000149735	170589	GPHA2	11	11q13.1	glycoprotein hormone alpha 2	926	3.93355	3.57e-06	8.66e-05
ENSG00000172061	131578	LRRC15	3	3q29	leucine rich repeat containing 15	5940	3.9303	1.09e-07	7.19e-06
ENSG00000137868	64220	STRA6	15	15q24.1	stimulated by retinoic acid 6	7690	3.91067	3.69e-10	1.56e-07
ENSG00000163216	6703	SPRR2D	1	1q21-q22	small proline-rich protein 2D	1057	3.9024	2.78e-07	1.42e-05
ENSG00000134398	10595	ERN2	16	16p12.2	endoplasmic reticulum to nucleus signaling 2	5015	3.896	6.82e-06	0.000145167
ENSG00000012817	8284	KDM5D	Y	Yq11	lysine (K)-specific demethylase 5D	9463	3.83704	0.00854249	0.0362395
ENSG00000178934	653499	LGALS7B	19	19q13.2	lectin, galactoside-binding, soluble, 7B	644	3.83051	0.00013238	0.00129498
ENSG00000171004	90161	HS6ST2	X	Xq26.2	heparan sulfate 6-O-sulfotransferase 2	4948	3.82909	2.01e-10	1.04e-07
ENSG00000189280	2709	GJB5	1	1p35.1	gap junction protein beta 5	1355	3.82471	5.62e-05	0.000680216
ENSG00000137975	9635	CLCA2	1	1p22.3	chloride channel accessory 2	4496	3.8033	4.71e-06	0.000109711
ENSG00000134817	187	APLNR	11	11q12	apelin receptor	3738	3.80311	2.69e-07	1.38e-05
ENSG00000105641	6528	SLC5A5	19	19p13.11	solute carrier family 5 (sodium/iodide cotransporter), member 5	3652	3.80195	1.62e-05	0.00027234
ENSG00000147689	84985	FAM83A	8	8q24.13	family with sequence similarity 83 member A	6317	3.79047	6.9e-07	2.66e-05
ENSG00000198125	4151	MB	22	22q13.1	myoglobin	2168	3.78287	1.5e-05	0.000259105
ENSG00000197446	1572	CYP2F1	19	19q13.2	cytochrome P450 family 2 subfamily F member 1	2994	3.77486	6.2e-05	0.000729054
ENSG00000148702	3026	HABP2	10	10q25.3	hyaluronan binding protein 2	3657	3.77338	1.64e-08	2.03e-06
ENSG00000007062	8842	PROM1	4	4p15.32	prominin 1	7434	3.77109	2.99e-06	7.56e-05
ENSG00000164932	115908	CTHRC1	8	8q22.3	collagen triple helix repeat containing 1	1776	3.73841	3.46e-09	6.93e-07
ENSG00000075673	479	ATP12A	13	13q12.12|13q12.1-q12.3	ATPase, H+/K+ transporting, nongastric, alpha polypeptide	4442	3.72715	4.87e-06	0.0001124
ENSG00000172987	60495	HPSE2	10	10q23-q24	heparanase 2 (inactive)	4421	3.69213	6.33e-09	1.09e-06
ENSG00000160161	148113	CILP2	19	19p13.11	cartilage intermediate layer protein 2	4360	3.68453	5.55e-09	9.81e-07
ENSG00000170099	866	SERPINA6	14	14q32.1	serpin peptidase inhibitor, clade A (alpha-1 antiproteinase, antitrypsin), member 6	1852	3.67359	1.76e-06	5.14e-05
ENSG00000128218	29802	VPREB3	22	22q11.23|22q11	pre-B lymphocyte 3	610	3.67139	1.56e-07	9.38e-06
ENSG00000172020	2596	GAP43	3	3q13.31	growth associated protein 43	2087	3.66977	2.94e-11	4.1e-08
ENSG00000196344	131	ADH7	4	4q23-q24	alcohol dehydrogenase 7 (class IV), mu or sigma polypeptide	3108	3.63797	0.000451731	0.00338571
ENSG00000133063	1118	CHIT1	1	1q32.1	chitinase 1	7730	3.63374	2.32e-05	0.000349431
ENSG00000254709	100423062	IGLL5	22	22q11.22	immunoglobulin lambda-like polypeptide 5	1335	3.62159	6.4e-06	0.000137889
ENSG00000116748	270	AMPD1	1	1p13	adenosine monophosphate deaminase 1	2496	3.59957	1.7e-05	0.000282936
ENSG00000047457	1356	CP	3	3q23-q25	ceruloplasmin (ferroxidase)	7296	3.57358	3.91e-08	3.39e-06
ENSG00000186684	339761	CYP27C1	2	2q14.3	cytochrome P450 family 27 subfamily C member 1	4491	3.5545	2.12e-09	5.07e-07
ENSG00000108688	6354	CCL7	17	17q11.2-q12	chemokine (C-C motif) ligand 7	863	3.55184	6.29e-05	0.000733795
ENSG00000155066	150696	PROM2	2	2q11.1	prominin 2	6063	3.54468	3.05e-11	4.1e-08
ENSG00000158488	913	CD1E	1	1q23.1	CD1e molecule	2203	3.54364	1.05e-08	1.51e-06
ENSG00000163207	3713	IVL	1	1q21	involucrin	2153	3.54222	6.11e-07	2.43e-05
ENSG00000148735	79949	PLEKHS1	10	10q25.3	pleckstrin homology domain containing S1	5402	3.53492	8.5e-06	0.000170172
ENSG00000172724	6363	CCL19	9	9p13	chemokine (C-C motif) ligand 19	777	3.53409	1.02e-08	1.51e-06
ENSG00000244067	2939	GSTA2	6	6p12.1	glutathione S-transferase alpha 2	1313	3.53045	0.000219379	0.00192078
ENSG00000161055	92304	SCGB3A1	5	5q35.3	secretoglobin, family 3A, member 1	846	3.52002	1.47e-05	0.00025528
ENSG00000166922	6447	SCG5	15	15q13-q14	secretogranin V	2196	3.50842	2.83e-11	4.1e-08
ENSG00000124875	6372	CXCL6	4	4q13.3	chemokine (C-X-C motif) ligand 6	2183	3.49067	5.91e-06	0.000128943
ENSG00000105664	1311	COMP	19	19p13.1	cartilage oligomeric matrix protein	3101	3.49037	6.79e-09	1.15e-06
ENSG00000198807	5083	PAX9	14	14q13.3	paired box 9	6035	3.48897	2.27e-07	1.23e-05
ENSG00000188505	342897	NCCRP1	19	19q13.2	non-specific cytotoxic cell receptor protein 1 homolog (zebrafish)	1978	3.47433	7.22e-11	6.06e-08
ENSG00000092009	1215	CMA1	14	14q11.2	chymase 1, mast cell	937	3.46387	5.36e-06	0.000119943
ENSG00000166105	112937	GLB1L3	11	11q25	galactosidase beta 1 like 3	8945	3.45983	3.45e-08	3.15e-06
ENSG00000262406	4321	MMP12	11	11q22.3	matrix metallopeptidase 12	1874	3.42842	0.00152789	0.00895728
ENSG00000117983	727897	MUC5B	11	11p15.5	mucin 5B, oligomeric mucus/gel-forming	18598	3.41279	0.000134573	0.00130975
ENSG00000016602	22802	CLCA4	1	1p22.3	chloride channel accessory 4	3447	3.40663	3.5e-05	0.000470349
ENSG00000183036	5121	PCP4	21	21q22.2	Purkinje cell protein 4	1106	3.40623	3.2e-06	7.94e-05
ENSG00000132465	3512	JCHAIN	4	4q21	joining chain of multimeric IgA and IgM	1680	3.40065	1.33e-05	0.000236669
ENSG00000114270	1294	COL7A1	3	3p21.1	collagen, type VII, alpha 1	11071	3.39852	8.61e-09	1.38e-06
ENSG00000166428	122618	PLD4	14	14q32.33	phospholipase D family member 4	6874	3.39047	8.58e-10	2.74e-07
ENSG00000105696	25789	TMEM59L	19	19p12	transmembrane protein 59 like	2626	3.37965	1.07e-10	8.23e-08
ENSG00000145536	170690	ADAMTS16	5	5p15	ADAM metallopeptidase with thrombospondin type 1 motif 16	5863	3.37783	7.46e-05	0.000837905
ENSG00000164220	2151	F2RL2	5	5q13	coagulation factor II (thrombin) receptor-like 2	3429	3.34603	2.86e-07	1.43e-05
ENSG00000105369	973	CD79A	19	19q13.2	CD79a molecule	1503	3.34477	5.06e-06	0.000114659
ENSG00000149968	4314	MMP3	11	11q22.3	matrix metallopeptidase 3	2048	3.34432	6.16e-05	0.000726067
ENSG00000118785	6696	SPP1	4	4q22.1	secreted phosphoprotein 1	2321	3.34214	0.00280045	0.0146591
ENSG00000189433	127534	GJB4	1	1p34.3	gap junction protein beta 4	2840	3.30939	7.48e-06	0.000155238
ENSG00000054803	140689	CBLN4	20	20q13	cerebellin 4 precursor	3024	3.30244	5.58e-05	0.000677536
ENSG00000170476	51237	MZB1	5	5q31.2	marginal zone B and B1 cell-specific protein	2273	3.28339	3.52e-06	8.62e-05
ENSG00000110777	5450	POU2AF1	11	11q23.1	POU class 2 associating factor 1	7416	3.27636	3.27e-07	1.6e-05
ENSG00000134762	1825	DSC3	18	18q12.1	desmocollin 3	7056	3.26516	0.000499796	0.00367965
ENSG00000169676	1816	DRD5	4	4p16.1	dopamine receptor D5	2330	3.26273	2.8e-09	5.97e-07
ENSG00000215182	4586	MUC5AC	11	11p15.5	mucin 5AC, oligomeric mucus/gel-forming	17448	3.26241	0.000309546	0.0025289
ENSG00000144229	80731	THSD7B	2	2q22.1	thrombospondin type 1 domain containing 7B	6761	3.26169	4.68e-07	2.03e-05
ENSG00000073282	8626	TP63	3	3q28	tumor protein p63	7454	3.25534	8.91e-08	6.3e-06
ENSG00000120471	63970	TP53AIP1	11	11q24	tumor protein p53 regulated apoptosis inducing protein 1	3445	3.22797	1.03e-05	0.000194742
ENSG00000185479	3854	KRT6B	12	12q13.13	keratin 6B, type II	2282	3.22317	8.32e-06	0.000167332
ENSG00000141433	116	ADCYAP1	18	18p11	adenylate cyclase activating polypeptide 1 (pituitary)	3805	3.2226	0.000417769	0.0031881
ENSG00000137203	7020	TFAP2A	6	6p24	transcription factor AP-2 alpha (activating enhancer binding protein 2 alpha)	8245	3.21517	1e-07	6.76e-06
ENSG00000160472	147744	TMEM190	19	19q13.42	transmembrane protein 190	593	3.21328	9.13e-05	0.000975032
ENSG00000154080	83539	CHST9	18	18q11.2	carbohydrate (N-acetylgalactosamine 4-0) sulfotransferase 9	11522	3.20839	0.000145145	0.0013875
ENSG00000231738	144448	TSPAN19	12	12q21.31	tetraspanin 19	4085	3.20515	0.000514596	0.00375015
ENSG00000140287	3067	HDC	15	15q21.2	histidine decarboxylase	3956	3.18769	5.54e-08	4.48e-06
ENSG00000183196	4166	CHST6	16	16q22	carbohydrate (N-acetylglucosamine 6-O) sulfotransferase 6	8469	3.18211	4.36e-06	0.000102878
ENSG00000173227	91683	SYT12	11	11q13.2	synaptotagmin 12	10830	3.16992	1.16e-08	1.61e-06
ENSG00000002726	26	AOC1	7	7q36.1	amine oxidase, copper containing 1	3824	3.16759	1.3e-10	8.34e-08
ENSG00000187510	440107	PLEKHG7	12	12q22	pleckstrin homology and RhoGEF domain containing G7	3998	3.16651	2.33e-05	0.000349966
ENSG00000114455	11148	HHLA2	3	3q13.13	HERV-H LTR-associating 2	3627	3.16609	2.86e-08	2.87e-06
ENSG00000062038	1001	CDH3	16	16q22.1	cadherin 3, type 1, P-cadherin (placental)	6236	3.15459	1.95e-11	4.1e-08
ENSG00000181449	6657	SOX2	3	3q26.3-q27	SRY-box 2	2513	3.14963	8.75e-06	0.000173432
ENSG00000171551	9427	ECEL1	2	2q37.1	endothelin converting enzyme-like 1	2972	3.14052	2.78e-07	1.42e-05
ENSG00000230453	441459	ANKRD18B	9	9p13.3	ankyrin repeat domain 18B	5857	3.13043	3.64e-07	1.67e-05
ENSG00000197838	1553	CYP2A13	19	19q13.2	cytochrome P450 family 2 subfamily A member 13	1739	3.12983	1.24e-05	0.00022408
ENSG00000166426	1381	CRABP1	15	15q24	cellular retinoic acid binding protein 1	993	3.1211	3.39e-05	0.000462438
ENSG00000186471	158798	AKAP14	X	Xq24	A-kinase anchoring protein 14	1170	3.11674	0.000120234	0.00119965
ENSG00000157064	23057	NMNAT2	1	1q25	nicotinamide nucleotide adenylyltransferase 2	7165	3.09016	7.8e-12	2.62e-08
ENSG00000122691	7291	TWIST1	7	7p21.2	twist family bHLH transcription factor 1	2033	3.08962	2.14e-08	2.3e-06
ENSG00000183347	163351	GBP6	1	1p22.2	guanylate binding protein family member 6	2987	3.07941	2.13e-07	1.18e-05
ENSG00000168824	27065	NSG1	4	4p16.3	neuron specific gene family member 1	4355	3.07525	6.6e-10	2.22e-07
ENSG00000179913	10331	B3GNT3	19	19p13.1	UDP-GlcNAc:betaGal beta-1,3-N-acetylglucosaminyltransferase 3	2301	3.06998	2.95e-06	7.48e-05
ENSG00000133115	161003	STOML3	13	13q13.3	stomatin like 3	2205	3.06962	0.00101216	0.0064367
ENSG00000139194	83758	RBP5	12	12p13.31	retinol binding protein 5	1369	3.06955	1.66e-08	2.03e-06
ENSG00000170367	1473	CST5	20	20p11.21	cystatin D	756	3.06453	5.87e-07	2.35e-05
ENSG00000234224	730130	TMEM229A	7	7q31.32	transmembrane protein 229A	2108	3.06345	1.68e-07	9.89e-06
ENSG00000176920	2524	FUT2	19	19q13.3	fucosyltransferase 2	3380	3.04564	1.91e-08	2.15e-06
ENSG00000145040	90226	UCN2	3	3p21.3	urocortin 2	1481	3.04374	5.65e-07	2.28e-05
ENSG00000196104	50859	SPOCK3	4	4q32.3	sparc/osteonectin, cwcv and kazal-like domains proteoglycan (testican) 3	4482	3.04029	8.73e-05	0.00094647
ENSG00000204711	138255	C9orf135	9	9q21.12	chromosome 9 open reading frame 135	1279	3.02495	0.000255211	0.00216534
ENSG00000139193	939	CD27	12	12p13	CD27 molecule	1410	3.02428	8.73e-07	3.09e-05
ENSG00000137699	23650	TRIM29	11	11q23.3	tripartite motif containing 29	10218	3.00404	1.12e-06	3.68e-05
ENSG00000005102	4222	MEOX1	17	17q21	mesenchyme homeobox 1	2707	2.99814	2.62e-08	2.69e-06
ENSG00000100012	266629	SEC14L3	22	22q12.2	SEC14-like lipid binding 3	3663	2.99008	7.37e-07	2.77e-05
ENSG00000156234	10563	CXCL13	4	4q21	chemokine (C-X-C motif) ligand 13	1431	2.98522	0.0020107	0.0111539
ENSG00000179639	2205	FCER1A	1	1q23	Fc fragment of IgE, high affinity I, receptor for; alpha polypeptide	1165	2.97642	3.34e-07	1.62e-05
ENSG00000174156	2940	GSTA3	6	6p12.1	glutathione S-transferase alpha 3	1025	2.9732	3.51e-07	1.66e-05
ENSG00000170558	1000	CDH2	18	18q11.2	cadherin 2, type 1, N-cadherin (neuronal)	4950	2.96855	1.11e-07	7.26e-06
ENSG00000088836	83959	SLC4A11	20	20p12	solute carrier family 4, sodium borate transporter, member 11	4081	2.96478	5.95e-09	1.04e-06
ENSG00000149021	7356	SCGB1A1	11	11q12.3	secretoglobin, family 1A, member 1 (uteroglobin)	582	2.96427	3.44e-05	0.00046606
ENSG00000205420	3853	KRT6A	12	12q13.13	keratin 6A, type II	2928	2.96034	0.00844297	0.0358959
ENSG00000176601	80122	MAP3K19	2	2q21.3	mitogen-activated protein kinase kinase kinase 19	6010	2.95972	9.57e-05	0.0010149
ENSG00000197506	64078	SLC28A3	9	9q22.2	solute carrier family 28 (concentrative nucleoside transporter), member 3	5063	2.9592	1.78e-07	1.03e-05
ENSG00000173702	56667	MUC13	3	3q21.2	mucin 13, cell surface associated	3499	2.95715	1.39e-05	0.000245624
ENSG00000143297	83416	FCRL5	1	1q21	Fc receptor-like 5	12419	2.95331	3.12e-05	0.000435604
ENSG00000244694	442213	PTCHD4	6	6p12.3	patched domain containing 4	5177	2.94374	1e-07	6.76e-06
ENSG00000099958	91319	DERL3	22	22q11.23	derlin 3	3796	2.93183	2.36e-06	6.44e-05
ENSG00000167653	8000	PSCA	8	8q24.2	prostate stem cell antigen	1763	2.92381	0.00555855	0.0257793
ENSG00000101825	25878	MXRA5	X	Xp22.33	matrix-remodelling associated 5	9793	2.92229	1.64e-07	9.69e-06
ENSG00000203985	388633	LDLRAD1	1	1p32.3	low density lipoprotein receptor class A domain containing 1	2375	2.92117	2.16e-05	0.000333624
ENSG00000124237	128602	C20orf85	20	20q13.32	chromosome 20 open reading frame 85	803	2.92035	0.000591871	0.00420326
ENSG00000080572	139212	PIH1D3	X	Xq22.3	PIH1 domain containing 3	1931	2.91914	0.00149475	0.00881606
ENSG00000180383	245937	DEFB124	20	20q11.1	defensin beta 124	729	2.91826	2.63e-06	6.91e-05
ENSG00000149527	9651	PLCH2	1	1p36.32	phospholipase C eta 2	10781	2.91643	6.32e-07	2.47e-05
ENSG00000169064	79740	ZBBX	3	3q26.1	zinc finger, B-box domain containing	3972	2.90671	0.000534451	0.00386549
ENSG00000147573	84675	TRIM55	8	8q13.1	tripartite motif containing 55	3081	2.9013	4.1e-08	3.49e-06
ENSG00000064655	2139	EYA2	20	20q13.1	EYA transcriptional coactivator and phosphatase 2	3618	2.90124	7.82e-08	5.76e-06
ENSG00000112539	168090	C6orf118	6	6q27	chromosome 6 open reading frame 118	2240	2.90023	0.000119764	0.00119595
ENSG00000128606	10234	LRRC17	7	7q22.1	leucine rich repeat containing 17	2674	2.89943	1.59e-07	9.46e-06
ENSG00000203734	345930	ECT2L	6	6q24.1	epithelial cell transforming 2 like	4624	2.89688	0.000126503	0.00124931
ENSG00000054938	25884	CHRDL2	11	11q14	chordin-like 2	3135	2.88947	2.31e-07	1.24e-05
ENSG00000183273	160777	CCDC60	12	12q24.23	coiled-coil domain containing 60	3440	2.88841	1.84e-05	0.000298161
ENSG00000169436	169044	COL22A1	8	8q24.3	collagen, type XXII, alpha 1	7830	2.88615	2.17e-07	1.2e-05
ENSG00000133110	10631	POSTN	13	13q13.3	periostin, osteoblast specific factor	5464	2.87986	2.09e-05	0.000326157
ENSG00000113296	7060	THBS4	5	5q13	thrombospondin 4	4605	2.87948	2.7e-09	5.95e-07
ENSG00000145113	4585	MUC4	3	3q29	mucin 4, cell surface associated	21325	2.87355	3.62e-07	1.67e-05
ENSG00000276085	414062	CCL3L3	17	17q21.1	chemokine (C-C motif) ligand 3-like 3	1469	2.85949	1.29e-07	8.1e-06
ENSG00000174776	151790	WDR49	3	3q26.1	WD repeat domain 49	3891	2.85841	1.74e-06	5.14e-05
ENSG00000185681	254956	MORN5	9	9q33.2	MORN repeat containing 5	868	2.84585	0.000605286	0.00427873
ENSG00000132185	84824	FCRLA	1	1q23.3	Fc receptor-like A	3275	2.84175	2.68e-05	0.00038817
ENSG00000173627	403314	APOBEC4	1	1q25.3	apolipoprotein B mRNA editing enzyme, catalytic polypeptide-like 4 (putative)	2653	2.83495	0.000139569	0.00134666
ENSG00000187955	7373	COL14A1	8	8q23	collagen, type XIV, alpha 1	8647	2.82792	1.68e-08	2.03e-06
ENSG00000152611	133690	CAPSL	5	5p13.2	calcyphosine-like	1135	2.82773	0.000691411	0.00475491
ENSG00000187689	401138	AMTN	4	4q13.3	amelotin	1037	2.81925	1.67e-05	0.000279379
ENSG00000167759	26085	KLK13	19	19q13.33	kallikrein related peptidase 13	2007	2.81758	3.95e-07	1.77e-05
ENSG00000026751	57823	SLAMF7	1	1q23.1-q24.1	SLAM family member 7	4833	2.81729	1.48e-07	9.02e-06
ENSG00000180532	201516	ZSCAN4	19	19q13.43	zinc finger and SCAN domain containing 4	2249	2.81572	7.96e-08	5.81e-06
ENSG00000183114	163933	FAM43B	1	1p36.12	family with sequence similarity 43 member B	2572	2.81306	3.87e-08	3.37e-06
ENSG00000077327	9576	SPAG6	10	10p12.2	sperm associated antigen 6	3887	2.81299	0.000115847	0.00116988
ENSG00000149256	26011	TENM4	11	11q14.1	teneurin transmembrane protein 4	16332	2.80659	1.11e-08	1.58e-06
ENSG00000094755	2568	GABRP	5	5q35.1	gamma-aminobutyric acid (GABA) A receptor, pi	4621	2.80474	0.00214755	0.0118019
ENSG00000133665	84332	DYDC2	10	10q23.1	DPY30 domain containing 2	2465	2.80425	5.19e-05	0.000642403
ENSG00000158485	910	CD1B	1	1q23.1	CD1b molecule	1395	2.80316	3.73e-07	1.69e-05
ENSG00000170482	9963	SLC23A1	5	5q31.2	solute carrier family 23 (ascorbic acid transporter), member 1	3203	2.80231	0.000324756	0.00261499
ENSG00000139330	11081	KERA	12	12q22	keratocan	2162	2.79709	3.4e-07	1.64e-05
ENSG00000185155	83881	MIXL1	1	1q42.12	Mix paired-like homeobox	2029	2.79194	1.98e-08	2.2e-06
ENSG00000183644	399949	C11orf88	11	11q23.1	chromosome 11 open reading frame 88	3280	2.79174	0.000273247	0.00228517
ENSG00000102109	27344	PCSK1N	X	Xp11.23	proprotein convertase subtilisin/kexin type 1 inhibitor	1363	2.78847	6.07e-07	2.42e-05
ENSG00000136918	401551	WDR38	9	9q33.3	WD repeat domain 38	1387	2.78639	0.000322481	0.00260457
ENSG00000170454	9119	KRT75	12	12q13	keratin 75, type II	2324	2.78361	0.000241181	0.00206325
ENSG00000165309	219681	ARMC3	10	10p12.31	armadillo repeat containing 3	6999	2.78292	0.000112926	0.00114642
ENSG00000147697	56169	GSDMC	8	8q24.21	gasdermin C	2934	2.78261	3.86e-09	7.41e-07
ENSG00000181322	347736	NME9	3	3q22.3	NME/NM23 family member 9	3738	2.78119	4.06e-05	0.000528704
ENSG00000175664	122046	TEX26	13	13q12.3	testis expressed 26	1660	2.77669	0.000991465	0.00632907
ENSG00000166959	83661	MS4A8	11	11q12.2	membrane-spanning 4-domains, subfamily A, member 8	2583	2.77526	0.000165905	0.00153145
ENSG00000203963	400757	C1orf141	1	1p31.3	chromosome 1 open reading frame 141	5022	2.77352	0.000781759	0.00526535
ENSG00000168453	55806	HR	8	8p21.2	hair growth associated	8784	2.75537	1.31e-08	1.75e-06
ENSG00000174871	254263	CNIH2	11	11q13.2	cornichon family AMPA receptor auxiliary protein 2	2069	2.75512	5.73e-08	4.58e-06
ENSG00000130433	59285	CACNG6	19	19q13.4	calcium channel, voltage-dependent, gamma subunit 6	1853	2.75346	0.000112097	0.00114058
ENSG00000003096	90293	KLHL13	X	Xq23-q24	kelch like family member 13	6983	2.75207	1.58e-08	1.99e-06
ENSG00000182329	100652824	KIAA2012	2	2q33.1	KIAA2012	7612	2.75186	2.06e-05	0.00032344
ENSG00000132517	55065	SLC52A1	17	17p13.2	solute carrier family 52 (riboflavin transporter), member 1	3934	2.74795	4.04e-08	3.48e-06
ENSG00000153822	3773	KCNJ16	17	17q24.3	potassium channel, inwardly rectifying subfamily J, member 16	6340	2.7472	6.58e-05	0.000757147
ENSG00000103742	57722	IGDCC4	15	15q22.31	immunoglobulin superfamily, DCC subclass, member 4	7764	2.74681	1.13e-06	3.7e-05
ENSG00000138823	4547	MTTP	4	4q24	microsomal triglyceride transfer protein	5398	2.74665	9.6e-09	1.48e-06
ENSG00000126838	5858	PZP	12	12p13-p12.2	pregnancy-zone protein	6227	2.74142	1.98e-06	5.61e-05
ENSG00000256812	84290	CAPNS2	16	16q12.2	calpain, small subunit 2	1016	2.74054	1.94e-05	0.000310933
ENSG00000230873	401236	STMND1	6	6p22.3	stathmin domain containing 1	2882	2.73509	0.000131617	0.00128845
ENSG00000110900	441631	TSPAN11	12	12p11.21	tetraspanin 11	7113	2.72971	7.13e-09	1.18e-06
ENSG00000109182	80157	CWH43	4	4p11	cell wall biogenesis 43 C-terminal homolog	3138	2.72736	0.000197063	0.00175981
ENSG00000100628	51676	ASB2	14	14q31-q32	ankyrin repeat and SOCS box containing 2	5040	2.72476	1.46e-09	3.92e-07
ENSG00000164185	133923	ZNF474	5	5q23.2	zinc finger protein 474	2364	2.7185	3.05e-05	0.000427508
ENSG00000111087	2735	GLI1	12	12q13.2-q13.3	GLI family zinc finger 1	4204	2.71105	3.41e-07	1.64e-05
ENSG00000187017	83715	ESPN	1	1p36.31	espin	4651	2.70949	9.35e-07	3.21e-05
ENSG00000101447	81610	FAM83D	20	20q11.23	family with sequence similarity 83 member D	2475	2.7094	2.06e-08	2.27e-06
ENSG00000169314	150248	C22orf15	22	22q11.23	chromosome 22 open reading frame 15	2086	2.70738	0.000219814	0.00192209
ENSG00000164265	117156	SCGB3A2	5	5q32	secretoglobin, family 3A, member 2	1075	2.70639	8.74e-05	0.000946874
ENSG00000168398	624	BDKRB2	14	14q32.1-q32.2	bradykinin receptor B2	6845	2.70017	1.21e-08	1.63e-06
ENSG00000133640	84125	LRRIQ1	12	12q21.31	leucine-rich repeats and IQ motif containing 1	7560	2.69744	3.57e-05	0.000476818
ENSG00000117322	1380	CR2	1	1q32	complement component (3d/Epstein Barr virus) receptor 2	4885	2.69649	0.000271805	0.00227594
ENSG00000151023	219670	ENKUR	10	10p12.1	enkurin, TRPC channel interacting protein	4076	2.69537	0.000102676	0.00106834
ENSG00000186891	8784	TNFRSF18	1	1p36.3	tumor necrosis factor receptor superfamily member 18	1370	2.69501	6.92e-08	5.34e-06
ENSG00000187905	400891	LRRC74B	22	22q11.21	leucine rich repeat containing 74B	5542	2.69478	4.45e-05	0.000568899
ENSG00000117472	10103	TSPAN1	1	1p34.1	tetraspanin 1	2366	2.68745	9.77e-05	0.00102923
ENSG00000151790	6999	TDO2	4	4q31-q32	tryptophan 2,3-dioxygenase	5264	2.68562	0.00018574	0.00167428
ENSG00000151789	79750	ZNF385D	3	3p24.3	zinc finger protein 385D	13621	2.68165	1.18e-07	7.61e-06
ENSG00000118307	55259	CASC1	12	12p12.1	cancer susceptibility candidate 1	2952	2.68067	1.25e-05	0.00022418
ENSG00000203952	347475	CCDC160	X	Xq26.2	coiled-coil domain containing 160	1790	2.67918	5.48e-05	0.000670063
ENSG00000176083	257101	ZNF683	1	1p36.11	zinc finger protein 683	2379	2.67895	9.68e-05	0.00102342
ENSG00000269404	6689	SPIB	19	19q13.3-q13.4	Spi-B transcription factor (Spi-1/PU.1 related)	4281	2.67845	3.16e-08	2.99e-06
ENSG00000117501	80133	MROH9	1	1q24.3	maestro heat-like repeat family member 9	3831	2.6778	9.75e-05	0.00102828
ENSG00000158315	54933	RHBDL2	1	1p34.3	rhomboid, veinlet-like 2 (Drosophila)	2795	2.67457	1.17e-10	8.23e-08
ENSG00000115423	1768	DNAH6	2	2p11.2	dynein, axonemal, heavy chain 6	13514	2.66977	1.49e-05	0.000257902
ENSG00000198732	64093	SMOC1	14	14q24.2	SPARC related modular calcium binding 1	4369	2.66863	1.73e-08	2.05e-06
ENSG00000117090	6504	SLAMF1	1	1q23.3	signaling lymphocytic activation molecule family member 1	4269	2.6657	1.02e-07	6.83e-06
ENSG00000115641	2274	FHL2	2	2q12.2	four and a half LIM domains 2	6626	2.66374	5.96e-11	5.72e-08
ENSG00000066248	25791	NGEF	2	2q37	neuronal guanine nucleotide exchange factor	4678	2.66225	2.82e-07	1.42e-05
ENSG00000157103	6529	SLC6A1	3	3p25.3	solute carrier family 6 (neurotransmitter transporter), member 1	4904	2.65877	2.55e-06	6.8e-05
ENSG00000188931	257177	CFAP126	1	1q23.3	cilia and flagella associated protein 126	774	2.65447	9.28e-05	0.000989241
ENSG00000121753	576	ADGRB2	1	1p35	adhesion G protein-coupled receptor B2	7756	2.6511	4.48e-10	1.82e-07
ENSG00000152076	91409	CCDC74B	2	2q21.1	coiled-coil domain containing 74B	4487	2.6464	4.9e-06	0.000112588
ENSG00000153347	153643	FAM81B	5	5q15	family with sequence similarity 81 member B	2495	2.64517	6.97e-05	0.000791198
ENSG00000110492	4192	MDK	11	11p11.2	midkine (neurite growth-promoting factor 2)	2196	2.64258	5.38e-10	1.96e-07
ENSG00000137473	83894	TTC29	4	4q31.22	tetratricopeptide repeat domain 29	3332	2.64165	0.000127307	0.0012554
ENSG00000135205	57639	CCDC146	7	7q11.23	coiled-coil domain containing 146	4457	2.64095	5.56e-06	0.000122938
ENSG00000101134	55816	DOK5	20	20q13.2	docking protein 5	2604	2.64031	1.5e-08	1.94e-06
ENSG00000254726	92312	MEX3A	1	1q22	mex-3 RNA binding family member A	6124	2.64012	1.37e-10	8.37e-08
ENSG00000187492	389118	CDHR4	3	3p21.31	cadherin related family member 4	3163	2.63444	0.000256212	0.00217247
ENSG00000235162	387882	C12orf75	12	12q23.3	chromosome 12 open reading frame 75	2693	2.6296	4.95e-08	4.06e-06
ENSG00000049283	55040	EPN3	17	17q21.33	epsin 3	4642	2.62233	1.81e-07	1.04e-05
ENSG00000171724	57687	VAT1L	16	16q23.1	vesicle amine transport 1-like	4137	2.62036	1.19e-06	3.89e-05
ENSG00000157856	92749	DRC1	2	2p23.3	dynein regulatory complex subunit 1	3048	2.62033	0.000144986	0.00138697
ENSG00000100625	51804	SIX4	14	14q23	SIX homeobox 4	6658	2.61785	8.27e-07	2.99e-05
ENSG00000167858	83659	TEKT1	17	17p13.1	tektin 1	3847	2.61079	0.000368598	0.00288499
ENSG00000186973	440585	FAM183A	1	1p34.2	family with sequence similarity 183 member A	843	2.60232	0.00175922	0.0100035
ENSG00000224383	92340	PRR29	17	17q23.3	proline rich 29	4142	2.60063	1.95e-05	0.000311921
ENSG00000174844	201625	DNAH12	3	3p14.3	dynein, axonemal, heavy chain 12	13275	2.59962	7.03e-05	0.000797669
ENSG00000150551	116372	LYPD1	2	2q21.2	LY6/PLAUR domain containing 1	2412	2.59777	1.04e-06	3.5e-05
ENSG00000197748	80217	CFAP43	10	10q25.1	cilia and flagella associated protein 43	7184	2.5947	7.85e-05	0.000875367
ENSG00000164749	3174	HNF4G	8	8q21.11	hepatocyte nuclear factor 4, gamma	4806	2.59451	1.78e-05	0.000293545
ENSG00000163032	7447	VSNL1	2	2p24.3	visinin like 1	3833	2.58848	7.41e-08	5.6e-06
ENSG00000172361	220136	CFAP53	18	18q21.1	cilia and flagella associated protein 53	1851	2.5882	2.39e-05	0.000356383
ENSG00000180875	64388	GREM2	1	1q43	gremlin 2, DAN family BMP antagonist	4170	2.5872	5.39e-09	9.65e-07
ENSG00000165731	5979	RET	10	10q11.2	ret proto-oncogene	6661	2.58108	2.77e-09	5.97e-07
ENSG00000159588	149483	CCDC17	1	1p34.1	coiled-coil domain containing 17	3323	2.58065	4.91e-05	0.000615652
ENSG00000177455	930	CD19	16	16p11.2	CD19 molecule	2711	2.58013	1.13e-05	0.000210488
ENSG00000120262	80129	CCDC170	6	6q25.1	coiled-coil domain containing 170	5419	2.57854	1.7e-05	0.000282936
ENSG00000188452	375298	CERKL	2	2q31.3	ceramide kinase like	4765	2.57851	0.000246848	0.0021077
ENSG00000156103	4325	MMP16	8	8q21.3	matrix metallopeptidase 16	12115	2.5772	8.83e-05	0.000953097
ENSG00000164972	84688	C9orf24	9	9p13.3	chromosome 9 open reading frame 24	1439	2.57687	0.000898221	0.00587342
ENSG00000178965	127254	ERICH3	1	1p31.1	glutamate rich 3	8779	2.57642	0.000117542	0.00118167
ENSG00000276070	9560	CCL4L2	17	17q12	chemokine (C-C motif) ligand 4-like 2	1397	2.57533	1.71e-06	5.07e-05
ENSG00000122735	27019	DNAI1	9	9p13.3	dynein, axonemal, intermediate chain 1	3615	2.57212	7.65e-05	0.000856803
ENSG00000166596	146845	CFAP52	17	17p13.1	cilia and flagella associated protein 52	3078	2.56987	0.000296959	0.00244991
ENSG00000124939	4246	SCGB2A1	11	11q13	secretoglobin, family 2A, member 1	521	2.56682	0.00996398	0.0408879
ENSG00000160188	89765	RSPH1	21	21q22.3	radial spoke head 1 homolog (Chlamydomonas)	2988	2.56501	0.000334113	0.00267271
ENSG00000270765	246176	GAS2L2	17	17q12	growth arrest specific 2 like 2	3014	2.56385	1.28e-05	0.000228949
ENSG00000164746	136288	C7orf57	7	7p12.3	chromosome 7 open reading frame 57	2275	2.56369	0.000136282	0.00131968
ENSG00000170509	345275	HSD17B13	4	4q22.1	hydroxysteroid (17-beta) dehydrogenase 13	2397	2.5617	5.54e-06	0.000122938
ENSG00000007174	1770	DNAH9	17	17p12	dynein, axonemal, heavy chain 9	16980	2.56148	0.000106662	0.00110029
ENSG00000153789	339145	FAM92B	16	16q24.1	family with sequence similarity 92 member B	1904	2.56052	0.00036021	0.0028342
ENSG00000034239	79645	EFCAB1	8	8q11.21	EF-hand calcium binding domain 1	5805	2.55889	0.000535996	0.00387457
ENSG00000178125	286187	PPP1R42	8	8q13.1	protein phosphatase 1 regulatory subunit 42	2250	2.55264	0.000260392	0.00219958
ENSG00000188523	389799	CFAP77	9	9q34.13	cilia and flagella associated protein 77	2147	2.5513	0.000770093	0.00521064
ENSG00000166869	63928	CHP2	16	16p12.2	calcineurin-like EF-hand protein 2	2382	2.55118	0.00460126	0.0221759
ENSG00000132639	6616	SNAP25	20	20p12-p11.2	synaptosome associated protein 25kDa	3357	2.54991	2.41e-05	0.00035831
ENSG00000272398	100133941	CD24	6	6q21	CD24 molecule	3097	2.54657	1.23e-10	8.23e-08
ENSG00000222046	149069	DCDC2B	1	1p35.1	doublecortin domain containing 2B	1869	2.54372	0.000802313	0.00537182
ENSG00000168658	200403	VWA3B	2	2q11.2	von Willebrand factor A domain containing 3B	8307	2.54176	0.000139404	0.00134603
ENSG00000181374	6357	CCL13	17	17q11.2	chemokine (C-C motif) ligand 13	851	2.53938	8.37e-08	6.01e-06
ENSG00000187726	374407	DNAJB13	11	11q13.4	DnaJ heat shock protein family (Hsp40) member B13	3475	2.53922	2.53e-05	0.000370704
ENSG00000137573	23213	SULF1	8	8q13.2	sulfatase 1	9404	2.53882	4.35e-07	1.9e-05
ENSG00000177459	203111	ERICH5	8	8q22.2	glutamate rich 5	1761	2.53791	2.65e-05	0.00038535
ENSG00000179813	144809	FAM216B	13	13q14.11	family with sequence similarity 216 member B	3308	2.53724	0.00158972	0.00926311
ENSG00000149090	25891	PAMR1	11	11p13	peptidase domain containing associated with muscle regeneration 1	3863	2.5352	2.38e-07	1.26e-05
ENSG00000206199	389161	ANKUB1	3	3q25.1	ankyrin repeat and ubiquitin domain containing 1	6539	2.5293	0.000482405	0.00357177
ENSG00000140481	80125	CCDC33	15	15q24.1	coiled-coil domain containing 33	4627	2.52838	0.00031083	0.00253435
ENSG00000188910	2707	GJB3	1	1p34	gap junction protein beta 3	2387	2.52692	1.7e-07	9.96e-06
ENSG00000188659	283726	SAXO2	15	15q25.2	stabilizer of axonemal microtubules 2	4160	2.5264	0.000247189	0.00210927
ENSG00000171595	64446	DNAI2	17	17q25	dynein, axonemal, intermediate chain 2	2851	2.5256	0.00014614	0.00139503
ENSG00000169126	55130	ARMC4	10	10p12.1	armadillo repeat containing 4	4773	2.5241	1.52e-05	0.000261094
ENSG00000163060	150483	TEKT4	2	2q11.1	tektin 4	2218	2.5235	0.000253343	0.00215358
ENSG00000111834	345895	RSPH4A	6	6q22.1	radial spoke head 4 homolog A (Chlamydomonas)	2840	2.52347	1.51e-05	0.000259485
ENSG00000132563	51308	REEP2	5	5q31	receptor accessory protein 2	3284	2.5222	4.26e-11	5.21e-08
ENSG00000146166	51557	LGSN	6	6pter-q22.33	lengsin, lens protein with glutamine synthetase domain	5823	2.52129	3.84e-05	0.00050556
ENSG00000162949	92291	CAPN13	2	2p22-p21	calpain 13	5191	2.51843	5.44e-08	4.43e-06
ENSG00000077274	827	CAPN6	X	Xq23	calpain 6	3568	2.51818	1.08e-05	0.000202364
ENSG00000133101	8900	CCNA1	13	13q12.3-q13	cyclin A1	2400	2.51638	3.25e-05	0.000446721
ENSG00000149043	90019	SYT8	11	11p15.5	synaptotagmin 8	4704	2.51597	3.14e-06	7.82e-05
ENSG00000162643	126820	WDR63	1	1p22.3	WD repeat domain 63	3923	2.51502	2.74e-06	7.09e-05
ENSG00000173557	339778	C2orf70	2	2p23.3	chromosome 2 open reading frame 70	2507	2.51134	2.89e-05	0.000411469
ENSG00000204291	1306	COL15A1	9	9q21-q22	collagen, type XV, alpha 1	6653	2.51065	3.08e-07	1.52e-05
ENSG00000111344	8437	RASAL1	12	12q23-q24	RAS protein activator like 1 (GAP1 like)	4813	2.50961	1.11e-07	7.26e-06
ENSG00000064787	8537	BCAS1	20	20q13.2	breast carcinoma amplified sequence 1	8186	2.5094	2.9e-08	2.88e-06
ENSG00000100218	27156	RSPH14	22	22q11.2	radial spoke head 14 homolog (Chlamydomonas)	2436	2.50815	0.000258297	0.00218601
ENSG00000178796	284485	RIIAD1	1	1q21.3	regulatory subunit of type II PKA R-subunit (RIIa) domain containing 1	2261	2.50679	0.000225842	0.00195822
ENSG00000154479	129881	CCDC173	2	2q31.1	coiled-coil domain containing 173	2236	2.50678	1.97e-05	0.000313152
ENSG00000185860	339512	CCDC190	1	1q23.3	coiled-coil domain containing 190	4316	2.50564	0.000342216	0.00272777
ENSG00000178531	404217	CTXN1	19	19p13.2	cortexin 1	1274	2.50478	1.35e-05	0.000238987
ENSG00000148848	8038	ADAM12	10	10q26	ADAM metallopeptidase domain 12	9860	2.50439	5.21e-06	0.000117092
ENSG00000163491	152110	NEK10	3	3p24.1	NIMA-related kinase 10	9582	2.50182	0.000133611	0.00130322
ENSG00000135472	23017	FAIM2	12	12q13	Fas apoptotic inhibitory molecule 2	6057	2.50054	3.56e-06	8.65e-05
ENSG00000131435	8572	PDLIM4	5	5q31.1	PDZ and LIM domain 4	3192	2.49974	8.33e-10	2.73e-07
ENSG00000158486	55567	DNAH3	16	16p12.3	dynein, axonemal, heavy chain 3	14960	2.49934	0.000288583	0.00238962
ENSG00000176029	56673	C11orf16	11	11p15.3	chromosome 11 open reading frame 16	2607	2.49405	6.96e-05	0.000790441
ENSG00000196169	124602	KIF19	17	17q25.1	kinesin family member 19	5640	2.49035	1.49e-05	0.000257856
ENSG00000186710	387885	CFAP73	12	12q24.13	cilia and flagella associated protein 73	1726	2.48737	4.33e-05	0.0005571
ENSG00000170788	143241	DYDC1	10	10q23.1	DPY30 domain containing 1	1237	2.48149	0.000804987	0.00538703
ENSG00000144354	83879	CDCA7	2	2q31	cell division cycle associated 7	3934	2.47706	2.15e-09	5.07e-07
ENSG00000108602	218	ALDH3A1	17	17p11.2	aldehyde dehydrogenase 3 family member A1	3918	2.474	8.65e-05	0.00093957
ENSG00000126353	1236	CCR7	17	17q12-q21.2	chemokine (C-C motif) receptor 7	2508	2.47297	7.13e-07	2.72e-05
ENSG00000173838	162333	2021-03-10	17	17q23.2	membrane associated ring-CH-type finger 10	4920	2.47191	1.23e-05	0.000222335
ENSG00000139537	85478	CCDC65	12	12q13.12	coiled-coil domain containing 65	2373	2.471	7.08e-05	0.00080179
ENSG00000138755	4283	CXCL9	4	4q21	chemokine (C-X-C motif) ligand 9	2740	2.46706	0.0054239	0.0252507
ENSG00000043039	8538	BARX2	11	11q25	BARX homeobox 2	3660	2.46542	2.22e-07	1.21e-05
ENSG00000168081	5368	PNOC	8	8p21	prepronociceptin	2126	2.46273	4.32e-06	0.000102565
ENSG00000128591	2318	FLNC	7	7q32-q35	filamin C	9280	2.46196	3.2e-08	3.01e-06
ENSG00000146197	222663	SCUBE3	6	6p21.3	signal peptide, CUB domain, EGF-like 3	7356	2.46007	1.75e-06	5.14e-05
ENSG00000111199	59341	TRPV4	12	12q24.1	transient receptor potential cation channel, subfamily V, member 4	3759	2.45641	7.84e-08	5.76e-06
ENSG00000162004	124093	CCDC78	16	16p13.3	coiled-coil domain containing 78	4147	2.45535	0.000379713	0.00295648
ENSG00000129654	2302	FOXJ1	17	17q25.1	forkhead box J1	2641	2.45398	2.99e-06	7.56e-05
ENSG00000053702	83714	NRIP2	12	12p13.33	nuclear receptor interacting protein 2	2803	2.45355	1.02e-08	1.51e-06
ENSG00000166920	84419	C15orf48	15	15q21.1	chromosome 15 open reading frame 48	1405	2.45298	1.04e-07	6.93e-06
ENSG00000181847	201633	TIGIT	3	3q13.31	T-cell immunoreceptor with Ig and ITIM domains	6091	2.45143	1.31e-06	4.11e-05
ENSG00000182272	338707	B4GALNT4	11	11p15.5	beta-1,4-N-acetyl-galactosaminyl transferase 4	3761	2.45084	1.77e-08	2.05e-06
ENSG00000144834	29114	TAGLN3	3	3q13.2	transgelin 3	1791	2.45053	5.52e-05	0.000673438
ENSG00000114204	5276	SERPINI2	3	3q26.1	serpin peptidase inhibitor, clade I (pancpin), member 2	2835	2.44793	5.45e-05	0.000668292
ENSG00000162543	127733	UBXN10	1	1p36.12	UBX domain protein 10	5571	2.44688	3.08e-06	7.71e-05
ENSG00000240505	23495	TNFRSF13B	17	17p11.2	tumor necrosis factor receptor superfamily member 13B	3550	2.44339	1.18e-05	0.000217525
ENSG00000122574	644150	WIPF3	7	7p14.3	WAS/WASL interacting protein family member 3	6065	2.44067	6.18e-07	2.44e-05
ENSG00000241106	3112	HLA-DOB	6	6p21.3	major histocompatibility complex, class II, DO beta	1858	2.43923	9.04e-08	6.3e-06
ENSG00000179902	127003	C1orf194	1	1p13.3	chromosome 1 open reading frame 194	1235	2.43784	0.00481393	0.0229276
ENSG00000215187	730112	FAM166B	9	9p13.3	family with sequence similarity 166 member B	1372	2.43735	0.000303603	0.00248943
ENSG00000115507	5013	OTX1	2	2p13	orthodenticle homeobox 1	4833	2.43536	7.85e-07	2.89e-05
ENSG00000143502	55061	SUSD4	1	1q41	sushi domain containing 4	4710	2.43388	1.13e-09	3.23e-07
ENSG00000104313	2138	EYA1	8	8q13.3	EYA transcriptional coactivator and phosphatase 1	5170	2.43281	0.000205571	0.00182327
ENSG00000167768	3848	KRT1	12	12q13.13	keratin 1, type II	2488	2.42907	0.000320498	0.00259314
ENSG00000148965	6291	SAA4	11	11p15.1-p14	serum amyloid A4, constitutive	727	2.42864	0.000821767	0.0054775
ENSG00000029559	3381	IBSP	4	4q21.1	integrin-binding sialoprotein	1546	2.42751	2.58e-06	6.82e-05
ENSG00000178401	79962	DNAJC22	12	12q13.12	DnaJ heat shock protein family (Hsp40) member C22	5006	2.42747	2.95e-09	6.09e-07
ENSG00000163885	348807	CFAP100	3	3q21.3	cilia and flagella associated protein 100	3352	2.42521	2.19e-05	0.000337148
ENSG00000054179	954	ENTPD2	9	9q34	ectonucleoside triphosphate diphosphohydrolase 2	2633	2.42437	1.46e-07	8.96e-06
ENSG00000188687	57835	SLC4A5	2	2p13	solute carrier family 4 (sodium bicarbonate cotransporter), member 5	8025	2.42099	9.74e-09	1.49e-06
ENSG00000196090	11122	PTPRT	20	20q12-q13	protein tyrosine phosphatase, receptor type, T	12943	2.41627	8.69e-05	0.000943929
ENSG00000186329	389177	TMEM212	3	3q26.31	transmembrane protein 212	2719	2.41346	6.31e-05	0.00073527
ENSG00000163576	151651	EFHB	3	3p24.3	EF-hand domain family member B	4163	2.41279	1.32e-05	0.000234261
ENSG00000004838	51364	ZMYND10	3	3p21.3	zinc finger, MYND-type containing 10	4009	2.41095	0.000121467	0.00120621
ENSG00000117477	57821	CCDC181	1	1q24	coiled-coil domain containing 181	3961	2.4105	1.81e-05	0.000295609
ENSG00000082482	3776	KCNK2	1	1q41	potassium channel, two pore domain subfamily K, member 2	3910	2.40907	0.000121074	0.00120545
ENSG00000169035	5650	KLK7	19	19q13.41	kallikrein related peptidase 7	2434	2.40789	0.00373699	0.0186378
ENSG00000132554	26166	RGS22	8	8q22.2	regulator of G-protein signaling 22	6363	2.40725	5.89e-06	0.000128657
ENSG00000197057	401124	DTHD1	4	4p14	death domain containing 1	5618	2.4062	0.000333776	0.0026716
ENSG00000140284	11001	SLC27A2	15	15q21.2	solute carrier family 27 (fatty acid transporter), member 2	2802	2.40357	2.33e-05	0.000349966
ENSG00000214215	338809	C12orf74	12	12q22	chromosome 12 open reading frame 74	2369	2.4034	0.000146797	0.00139932
ENSG00000165238	65268	WNK2	9	9q22.3	WNK lysine deficient protein kinase 2	13198	2.40251	5.45e-06	0.000121553
ENSG00000159625	84229	DRC7	16	16q21	dynein regulatory complex subunit 7	5151	2.39884	9.71e-05	0.00102643
ENSG00000106483	6424	SFRP4	7	7p14.1	secreted frizzled-related protein 4	3606	2.39879	8.16e-06	0.000165068
ENSG00000187398	338645	LUZP2	11	11p14.3	leucine zipper protein 2	8851	2.39839	9.38e-05	0.000997039
ENSG00000168589	83657	DYNLRB2	16	16q23.3	dynein, light chain, roadblock-type 2	1464	2.3932	0.000681332	0.00470003
ENSG00000184254	220	ALDH1A3	15	15q26.3	aldehyde dehydrogenase 1 family member A3	5772	2.39104	9e-07	3.16e-05
ENSG00000092850	27285	TEKT2	1	1p34.3	tektin 2 (testicular)	1978	2.39038	0.000222524	0.00193695
ENSG00000141294	90506	LRRC46	17	17q21.32	leucine rich repeat containing 46	2820	2.39019	0.000277506	0.00231072
ENSG00000171462	65989	DLK2	6	6p21.1	delta-like 2 homolog (Drosophila)	2236	2.38953	1.79e-05	0.000294345
ENSG00000177994	129852	C2orf73	2	2p16.2	chromosome 2 open reading frame 73	2716	2.3874	0.00026129	0.00220439
ENSG00000105479	93233	CCDC114	19	19q13.33	coiled-coil domain containing 114	4299	2.38407	6.86e-05	0.000782411
ENSG00000078900	7161	TP73	1	1p36.3	tumor protein p73	6763	2.38391	1.89e-05	0.000303705
ENSG00000125780	7053	TGM3	20	20q11.2	transglutaminase 3	2693	2.38259	7.65e-05	0.000856803
ENSG00000101463	79953	SYNDIG1	20	20p11.21	synapse differentiation inducing 1	2847	2.38165	1.14e-08	1.6e-06
ENSG00000105519	828	CAPS	19	19p13.3	calcyphosine	4428	2.38076	0.000161546	0.0015
ENSG00000101311	55612	FERMT1	20	20p12.3	fermitin family member 1	5359	2.3802	6.83e-09	1.15e-06
ENSG00000159713	51673	TPPP3	16	16q22.1	tubulin polymerization-promoting protein family member 3	2618	2.37839	3.96e-07	1.77e-05
ENSG00000165078	57094	CPA6	8	8q13.2	carboxypeptidase A6	2395	2.37833	6.95e-05	0.000790441
ENSG00000140527	56964	WDR93	15	15q26.1	WD repeat domain 93	4068	2.3749	2.42e-05	0.000360607
ENSG00000182557	201305	SPNS3	17	17p13.2	spinster homolog 3 (Drosophila)	2684	2.37121	1.79e-10	9.62e-08
ENSG00000175084	1674	DES	2	2q35	desmin	2464	2.37121	7.26e-08	5.54e-06
ENSG00000164122	140458	ASB5	4	4q34.2	ankyrin repeat and SOCS box containing 5	4064	2.37119	2.16e-05	0.00033289
ENSG00000158428	375307	CATIP	2	2q35	ciliogenesis associated TTC17 interacting protein	3821	2.36947	7.72e-06	0.000158323
ENSG00000113946	10686	CLDN16	3	3q28	claudin 16	3583	2.36879	0.000438379	0.00330779
ENSG00000161905	246	ALOX15	17	17p13.3	arachidonate 15-lipoxygenase	3404	2.36814	0.000846096	0.00560351
ENSG00000118997	56171	DNAH7	2	2q32.3	dynein, axonemal, heavy chain 7	21324	2.36793	1.88e-05	0.000303434
ENSG00000198074	57016	AKR1B10	7	7q33	aldo-keto reductase family 1, member B10 (aldose reductase)	1744	2.3677	0.00232274	0.0125895
ENSG00000163017	72	ACTG2	2	2p13.1	actin, gamma 2, smooth muscle, enteric	3811	2.36471	6.01e-07	2.4e-05
ENSG00000204950	390205	LRRC10B	11	11q12.2	leucine rich repeat containing 10B	2219	2.36463	0.00057973	0.00413289
ENSG00000179934	1237	CCR8	3	3p22	chemokine (C-C motif) receptor 8	1318	2.36457	1.96e-05	0.00031248
ENSG00000124466	27076	LYPD3	19	19q13.31	LY6/PLAUR domain containing 3	2519	2.36333	5.57e-10	1.97e-07
ENSG00000121898	119587	CPXM2	10	10q26.13	carboxypeptidase X (M14 family), member 2	4859	2.36036	4.12e-07	1.83e-05
ENSG00000188039	284434	NWD1	19	19p13.11	NACHT and WD repeat domain containing 1	8495	2.35893	0.000782491	0.00526535
ENSG00000184613	4753	NELL2	12	12q12	neural EGFL like 2	6424	2.35697	3.61e-05	0.000481086
ENSG00000176532	222171	PRR15	7	7p14.3	proline rich 15	1982	2.3526	0.000102336	0.00106631
ENSG00000174697	3952	LEP	7	7q31.3	leptin	3420	2.35001	0.000827221	0.00551111
ENSG00000177875	387856	CCDC184	12	12q13.11	coiled-coil domain containing 184	2343	2.34918	1.07e-07	7.11e-06
ENSG00000010282	57467	HHATL	3	3p22.1	hedgehog acyltransferase-like	2891	2.34913	4.72e-06	0.000109722
ENSG00000124143	343578	ARHGAP40	20	20q11.23	Rho GTPase activating protein 40	3195	2.34492	1.95e-06	5.57e-05
ENSG00000121895	80008	TMEM156	4	4p14	transmembrane protein 156	2562	2.34457	7.32e-06	0.000153102
ENSG00000183346	219621	C10orf107	10	10q21.2	chromosome 10 open reading frame 107	1685	2.34438	3.46e-05	0.000467519
ENSG00000169851	5099	PCDH7	4	4p15	protocadherin 7	12249	2.34386	1.18e-07	7.61e-06
ENSG00000166246	146562	C16orf71	16	16p13.3	chromosome 16 open reading frame 71	4656	2.33685	3.28e-05	0.00045018
ENSG00000165164	286464	CFAP47	X	Xp21.1	cilia and flagella associated protein 47	11445	2.33539	0.000207613	0.0018362
ENSG00000102468	3356	HTR2A	13	13q14-q21	5-hydroxytryptamine (serotonin) receptor 2A, G protein-coupled	5624	2.33307	2.41e-08	2.49e-06
ENSG00000162723	89886	SLAMF9	1	1q23.2	SLAM family member 9	1156	2.33222	3.57e-08	3.24e-06
ENSG00000108947	1949	EFNB3	17	17p13.1	ephrin-B3	3222	2.32954	6.16e-08	4.82e-06
ENSG00000204396	80737	VWA7	6	6p21.33	von Willebrand factor A domain containing 7	3638	2.32827	4.96e-09	9.12e-07
ENSG00000213085	25790	CFAP45	1	1q22	cilia and flagella associated protein 45	2625	2.32774	1.54e-05	0.000263631
ENSG00000091181	3568	IL5RA	3	3p26-p24	interleukin 5 receptor subunit alpha	6600	2.32708	2.54e-05	0.0003715
ENSG00000118492	79747	ADGB	6	6q24.3	androglobin	7773	2.32656	0.000223536	0.00194324
ENSG00000153012	55203	LGI2	4	4p15.2	leucine-rich repeat LGI family member 2	6428	2.32656	2.03e-09	5.04e-07
ENSG00000158023	144406	WDR66	12	12q24.31	WD repeat domain 66	16115	2.32653	1.21e-05	0.000219459
ENSG00000100079	3957	LGALS2	22	22q13.1	lectin, galactoside-binding, soluble, 2	828	2.3259	0.000402346	0.00309148
ENSG00000152672	165530	CLEC4F	2	2p13.3	C-type lectin domain family 4 member F	2475	2.3248	2.43e-06	6.57e-05
ENSG00000128346	84645	C22orf23	22	22q13.1	chromosome 22 open reading frame 23	2299	2.32151	5.09e-05	0.000632984
ENSG00000048462	608	TNFRSF17	16	16p13.1	tumor necrosis factor receptor superfamily member 17	1118	2.3195	0.000313891	0.00255203
ENSG00000160401	286207	CFAP157	9	9q34.11	cilia and flagella associated protein 157	4703	2.31871	5.63e-05	0.000680575
ENSG00000095752	3589	IL11	19	19q13.3-q13.4	interleukin 11	2671	2.31725	8.31e-05	0.000913127
ENSG00000181458	55076	TMEM45A	3	3q12.2	transmembrane protein 45A	6005	2.31613	9.24e-09	1.44e-06
ENSG00000141665	201456	FBXO15	18	18q22.3	F-box protein 15	6198	2.31539	7.42e-05	0.000834903
ENSG00000165923	79841	AGBL2	11	11p11.2	ATP/GTP binding protein-like 2	5483	2.31333	6.2e-05	0.000729054
ENSG00000168334	165904	XIRP1	3	3p22.2	xin actin binding repeat containing 1	6467	2.31204	0.000148517	0.0014147
ENSG00000198488	192134	B3GNT6	11	11q13.4	UDP-GlcNAc:betaGal beta-1,3-N-acetylglucosaminyltransferase 6	2626	2.31127	0.000761773	0.00516215
ENSG00000141934	8612	PLPP2	19	19p13	phospholipid phosphatase 2	7059	2.30957	5.7e-06	0.000125586
ENSG00000134775	80206	FHOD3	18	18q12	formin homology 2 domain containing 3	7965	2.30859	1.45e-06	4.45e-05
ENSG00000129151	8424	BBOX1	11	11p14.2	butyrobetaine (gamma), 2-oxoglutarate dioxygenase (gamma-butyrobetaine hydroxylase) 1	2464	2.30808	7.99e-06	0.000162445
ENSG00000125675	2892	GRIA3	X	Xq25	glutamate receptor, ionotropic, AMPA 3	6484	2.30693	1.29e-06	4.07e-05
ENSG00000102904	55815	TSNAXIP1	16	16q22.1	translin-associated factor X interacting protein 1	3852	2.30568	6.51e-05	0.000753288
ENSG00000155761	200162	SPAG17	1	1p12	sperm associated antigen 17	9552	2.30255	0.000176464	0.00160993
ENSG00000149380	283208	P4HA3	11	11q13.4	prolyl 4-hydroxylase, alpha polypeptide III	4009	2.29846	8.13e-08	5.87e-06
ENSG00000106278	5803	PTPRZ1	7	7q31.3	protein tyrosine phosphatase, receptor-type, Z polypeptide 1	9917	2.29321	0.000166118	0.00153237
ENSG00000132259	1262	CNGA4	11	11p15.4	cyclic nucleotide gated channel alpha 4	2167	2.2888	0.000260797	0.00220162
ENSG00000070526	55808	ST6GALNAC1	17	17q25.1	ST6 (alpha-N-acetyl-neuraminyl-2,3-beta-galactosyl-1,3)-N-acetylgalactosaminide alpha-2,6-sialyltransferase 1	3448	2.28712	1.01e-07	6.78e-06
ENSG00000065320	9423	NTN1	17	17p13.1	netrin 1	6383	2.28695	3.71e-07	1.69e-05
ENSG00000136689	3557	IL1RN	2	2q14.2	interleukin 1 receptor antagonist	3256	2.28546	4.01e-07	1.78e-05
ENSG00000278588	8346	HIST1H2BI	6	6p22.2	histone cluster 1, H2bi	381	2.2839	0.00165377	0.00956577
ENSG00000162571	254173	TTLL10	1	1p36.33	tubulin tyrosine ligase like 10	3943	2.2837	3.17e-05	0.000442327
ENSG00000112530	135138	PACRG	6	6q26	PARK2 co-regulated	2612	2.28361	8.59e-05	0.000935221
ENSG00000159212	54102	CLIC6	21	21q22.12	chloride intracellular channel 6	3860	2.28063	3.56e-09	6.96e-07
ENSG00000150873	130813	C2orf50	2	2p25.1	chromosome 2 open reading frame 50	2938	2.27932	3.22e-05	0.000445156
ENSG00000163689	200844	C3orf67	3	3p14.2	chromosome 3 open reading frame 67	9455	2.27566	7.24e-07	2.75e-05
ENSG00000159251	70	ACTC1	15	15q14	actin, alpha, cardiac muscle 1	4639	2.27414	6.15e-05	0.000725379
ENSG00000197168	341676	NEK5	13	13q14.3	NIMA-related kinase 5	6958	2.27406	0.000123337	0.00122225
ENSG00000163071	132671	SPATA18	4	4q12	spermatogenesis associated 18	4941	2.27222	1.05e-06	3.5e-05
ENSG00000128602	6608	SMO	7	7q32.3	smoothened, frizzled class receptor	4311	2.26862	4.67e-10	1.84e-07
ENSG00000156689	219970	GLYATL2	11	11q12.1	glycine-N-acyltransferase like 2	1838	2.26787	0.00219562	0.0120365
ENSG00000104783	3783	KCNN4	19	19q13.2	potassium channel, calcium activated intermediate/small conductance subfamily N alpha, member 4	3289	2.26774	4.67e-09	8.72e-07
ENSG00000107562	6387	CXCL12	10	10q11.1	chemokine (C-X-C motif) ligand 12	6077	2.26674	2.83e-07	1.42e-05
ENSG00000101222	25876	SPEF1	20	20p13	sperm flagellar 1	1925	2.26384	0.000635663	0.00443973
ENSG00000056998	8908	GYG2	X	Xp22.3	glycogenin 2	3646	2.26323	5.07e-11	5.24e-08
ENSG00000274997	85235	HIST1H2AH	6	6p21.33	histone cluster 1, H2ah	387	2.26294	0.00744592	0.0325541
ENSG00000100373	7380	UPK3A	22	22q13.31	uroplakin 3A	1051	2.26288	7.72e-09	1.25e-06
ENSG00000129951	79948	PLPPR3	19	19p13.3	phospholipid phosphatase related 3	2741	2.26157	4.55e-05	0.000580324
ENSG00000167178	57611	ISLR2	15	15q24.1	immunoglobulin superfamily containing leucine-rich repeat 2	6101	2.25982	2.25e-07	1.22e-05
ENSG00000103021	29070	CCDC113	16	16q21	coiled-coil domain containing 113	5927	2.258	4.76e-06	0.000110359
ENSG00000085552	57549	IGSF9	1	1q22-q23	immunoglobulin superfamily member 9	6628	2.25734	2.13e-08	2.3e-06
ENSG00000011590	27033	ZBTB32	19	19q13.1	zinc finger and BTB domain containing 32	2770	2.25556	8.04e-08	5.84e-06
ENSG00000205129	441054	C4orf47	4	4q35.1	chromosome 4 open reading frame 47	1366	2.25506	0.000150502	0.00142753
ENSG00000091482	23676	SMPX	X	Xp22.1	small muscle protein, X-linked	1040	2.2545	1.7e-06	5.07e-05
ENSG00000227877	100507027	MRLN	10	-	myoregulin	2941	2.25213	0.000156061	0.00146271
ENSG00000176678	2300	FOXL1	16	16q24	forkhead box L1	3742	2.25066	2.49e-09	5.58e-07
ENSG00000204815	83538	TTC25	17	17q21.2	tetratricopeptide repeat domain 25	2500	2.24959	3.68e-05	0.000488365
ENSG00000181378	255101	CFAP65	2	2q35	cilia and flagella associated protein 65	10519	2.24886	0.000133833	0.00130349
ENSG00000119147	84417	C2orf40	2	2q12.2	chromosome 2 open reading frame 40	1741	2.24582	2.65e-05	0.00038535
ENSG00000138587	55329	MNS1	15	15q21.3	meiosis specific nuclear structural 1	2504	2.24571	2.94e-05	0.000416745
ENSG00000215217	134121	C5orf49	5	5p15.31	chromosome 5 open reading frame 49	2385	2.24365	0.000405263	0.00311034
ENSG00000234602	345643	MCIDAS	5	5q11.2	multiciliate differentiation and DNA synthesis associated cell cycle protein	2091	2.24328	0.00155843	0.0091045
ENSG00000176956	4062	LY6H	8	8q24.3	lymphocyte antigen 6 complex, locus H	1881	2.23941	2.66e-05	0.00038535
ENSG00000116183	60676	PAPPA2	1	1q25.2	pappalysin 2	10930	2.23414	4.04e-05	0.000527598
ENSG00000160182	7031	TFF1	21	21q22.3	trefoil factor 1	551	2.23191	0.00421402	0.0206113
ENSG00000171877	84978	FRMD5	15	15q15.3	FERM domain containing 5	6325	2.23158	1.53e-06	4.64e-05
ENSG00000152669	10309	CCNO	5	5q11.2	cyclin O	1809	2.22788	0.00270989	0.0142956
ENSG00000160838	149499	LRRC71	1	1q23.1	leucine rich repeat containing 71	2631	2.22594	0.000127667	0.0012573
ENSG00000145358	115265	DDIT4L	4	4q24	DNA damage inducible transcript 4 like	2994	2.22468	0.000149202	0.00142023
ENSG00000138944	85352	KIAA1644	22	-	KIAA1644	6751	2.22446	1.23e-06	3.97e-05
ENSG00000174950	388611	CD164L2	1	1p36.11	CD164 sialomucin-like 2	2041	2.22159	2.43e-05	0.000361263
ENSG00000176381	285800	PRR18	6	6q27	proline rich 18	3149	2.21947	1.78e-05	0.000293539
ENSG00000203780	92565	FANK1	10	10q26.2	fibronectin type III and ankyrin repeat domains 1	3384	2.21754	2.69e-06	6.99e-05
ENSG00000069011	5307	PITX1	5	5q31.1	paired-like homeodomain 1	3511	2.2175	0.000316793	0.00256625
ENSG00000165383	474354	LRRC18	10	10q11.23	leucine rich repeat containing 18	1631	2.2174	1.22e-05	0.000220266
ENSG00000163331	92196	DAPL1	2	2q24.1	death associated protein like 1	1505	2.21444	0.00188945	0.0106182
ENSG00000171408	27115	PDE7B	6	6q23-q24	phosphodiesterase 7B	5946	2.21394	2.54e-07	1.32e-05
ENSG00000137098	26206	SPAG8	9	9p13.3	sperm associated antigen 8	2722	2.2108	9.88e-06	0.00018901
ENSG00000125409	64518	TEKT3	17	17p12	tektin 3	2609	2.21027	3.85e-06	9.3e-05
ENSG00000243710	149465	CFAP57	1	1p34.2	cilia and flagella associated protein 57	5764	2.20974	2.9e-05	0.000411945
ENSG00000100450	2999	GZMH	14	14q11.2	granzyme H	951	2.20825	0.00261626	0.0138616
ENSG00000006611	10083	USH1C	11	11p14.3	Usher syndrome 1C	4904	2.20799	0.000103972	0.0010775
ENSG00000142959	266675	BEST4	1	1p34.1	bestrophin 4	2047	2.20356	5.89e-06	0.000128657
ENSG00000122133	5047	PAEP	9	9q34	progestagen-associated endometrial protein	1454	2.2022	0.00072073	0.00492338
ENSG00000129244	482	ATP1B2	17	17p13.1	ATPase, Na+/K+ transporting, beta 2 polypeptide	3276	2.20208	5.87e-05	0.000699765
ENSG00000152763	79819	WDR78	1	1p31.3	WD repeat domain 78	6704	2.20169	1.73e-05	0.000286277
ENSG00000150628	132851	SPATA4	4	4q34.2	spermatogenesis associated 4	2464	2.20113	0.000450868	0.00338571
ENSG00000260220	399693	CCDC187	9	9q34	coiled-coil domain containing 187	4811	2.20071	0.000109523	0.00112101
ENSG00000138400	130752	MDH1B	2	2q33.3	malate dehydrogenase 1B	3110	2.19874	6.61e-05	0.000758247
ENSG00000164675	154865	IQUB	7	7q31.32	IQ motif and ubiquitin domain containing	5893	2.19638	6.48e-06	0.00013908
ENSG00000204983	5644	PRSS1	7	7q34	protease, serine 1	2081	2.19633	0.000461399	0.00345047
ENSG00000049768	50943	FOXP3	X	Xp11.23	forkhead box P3	2647	2.19269	1.42e-05	0.000249194
ENSG00000128536	222256	CDHR3	7	7q22.3	cadherin related family member 3	7087	2.19039	9.09e-05	0.000973272
ENSG00000151224	4143	MAT1A	10	10q22	methionine adenosyltransferase I, alpha	3690	2.18418	4.19e-06	0.000100234
ENSG00000124490	7180	CRISP2	6	6p12.3	cysteine-rich secretory protein 2	1518	2.1836	0.00588796	0.0268345
ENSG00000049249	3604	TNFRSF9	1	1p36	tumor necrosis factor receptor superfamily member 9	6331	2.18162	1.54e-05	0.000263393
ENSG00000183914	146754	DNAH2	17	17p13.1	dynein, axonemal, heavy chain 2	17231	2.18096	5.36e-05	0.000658675
ENSG00000257108	283948	NHLRC4	16	16p13.3	NHL repeat containing 4	2105	2.17607	6.54e-05	0.000754632
ENSG00000110076	9379	NRXN2	11	11q13	neurexin 2	10580	2.17097	3.26e-08	3.04e-06
ENSG00000101144	655	BMP7	20	20q13	bone morphogenetic protein 7	5418	2.16519	1.62e-07	9.6e-06
ENSG00000174898	257062	CATSPERD	19	19p13.3	catsper channel auxiliary subunit delta	2741	2.16493	0.0121202	0.0478082
ENSG00000167646	352909	DNAAF3	19	19q13.4	dynein, axonemal, assembly factor 3	3302	2.16338	0.000153765	0.0014503
ENSG00000101883	158800	RHOXF1	X	Xq24	Rhox homeobox family member 1	769	2.16335	3.23e-05	0.000445644
ENSG00000188316	387712	ENO4	10	10q25.3	enolase family member 4	3164	2.16251	1.46e-06	4.48e-05
ENSG00000188158	4810	NHS	X	Xp22.13	NHS actin remodeling regulator	10168	2.16199	9.62e-07	3.29e-05
ENSG00000176563	124817	CNTD1	17	17q21.31	cyclin N-terminal domain containing 1	3378	2.16084	4.04e-05	0.000527598
ENSG00000177098	6330	SCN4B	11	11q23.3	sodium channel, voltage gated, type IV beta subunit	5649	2.15989	8.93e-07	3.15e-05
ENSG00000100473	1690	COCH	14	14q11.2-q13	cochlin	3621	2.15894	9.75e-08	6.75e-06
ENSG00000120057	6425	SFRP5	10	10q24.1	secreted frizzled-related protein 5	1836	2.1588	0.000379601	0.00295648
ENSG00000069812	54626	HES2	1	1p36.31	hes family bHLH transcription factor 2	5407	2.15687	1.33e-06	4.14e-05
ENSG00000118402	6785	ELOVL4	6	6q14	ELOVL fatty acid elongase 4	3042	2.15426	2.34e-07	1.25e-05
ENSG00000154099	123872	DNAAF1	16	16q24.1	dynein, axonemal, assembly factor 1	7783	2.15372	8.1e-05	0.00089558
ENSG00000120051	159686	CFAP58	10	10q25.1	cilia and flagella associated protein 58	3548	2.15322	9.36e-06	0.000180608
ENSG00000162598	127795	C1orf87	1	1p32.1	chromosome 1 open reading frame 87	4422	2.15284	0.000437465	0.00330649
ENSG00000121005	83690	CRISPLD1	8	8q21.11	cysteine-rich secretory protein LCCL domain containing 1	4543	2.14929	2.72e-06	7.06e-05
ENSG00000171962	83450	DRC3	17	17p11.2	dynein regulatory complex subunit 3	7332	2.14844	5.19e-05	0.000642403
ENSG00000198003	115948	CCDC151	19	19p13.2	coiled-coil domain containing 151	2681	2.14833	0.00015543	0.00145969
ENSG00000165695	158067	AK8	9	9q34.13	adenylate kinase 8	2731	2.14759	9.31e-06	0.000179843
ENSG00000172551	118430	MUCL1	12	12q	mucin-like 1	1250	2.14741	0.00125093	0.00760148
ENSG00000153930	162282	ANKFN1	17	17q22	ankyrin repeat and fibronectin type III domain containing 1	6923	2.1467	6.24e-07	2.46e-05
ENSG00000108821	1277	COL1A1	17	17q21.33	collagen, type I, alpha 1	9819	2.14641	0.000291275	0.00241042
ENSG00000167964	25837	RAB26	16	16p13.3	RAB26, member RAS oncogene family	2488	2.14638	1.82e-06	5.28e-05
ENSG00000041982	3371	TNC	9	9q33	tenascin C	9636	2.14027	1.75e-06	5.14e-05
ENSG00000196711	389658	FAM150A	8	8q11.23	family with sequence similarity 150 member A	1217	2.13999	9.25e-07	3.21e-05
ENSG00000135549	5570	PKIB	6	6q22.31	protein kinase (cAMP-dependent, catalytic) inhibitor beta	3432	2.12709	5.45e-06	0.000121553
ENSG00000162670	339479	BRINP3	1	1q31.1	bone morphogenetic protein/retinoic acid inducible neural-specific 3	4287	2.12626	1e-05	0.000191276
ENSG00000163040	90557	CCDC74A	2	2q21.1	coiled-coil domain containing 74A	3077	2.12145	2.2e-05	0.000337603
ENSG00000165325	159989	CCDC67	11	11q21	coiled-coil domain containing 67	4227	2.12124	0.00012773	0.0012573
ENSG00000259120	100130933	SMIM6	17	-	small integral membrane protein 6	1086	2.11922	2.66e-06	6.94e-05
ENSG00000089012	55423	SIRPG	20	20p13	signal-regulatory protein gamma	2242	2.11586	2.07e-06	5.82e-05
ENSG00000112981	8382	NME5	5	5q31	NME/NM23 family member 5	2392	2.1147	1.44e-05	0.000251272
ENSG00000152760	200132	TCTEX1D1	1	1p31.3	Tctex1 domain containing 1	3100	2.11457	5.81e-05	0.000696585
ENSG00000156206	161502	CFAP161	15	15q25.1	cilia and flagella associated protein 161	1979	2.11302	5.19e-05	0.000642403
ENSG00000149201	60494	CCDC81	11	11q14.2	coiled-coil domain containing 81	4544	2.11147	6.22e-05	0.000730082
ENSG00000113578	2246	FGF1	5	5q31	fibroblast growth factor 1 (acidic)	5275	2.10508	4.96e-06	0.000113278
ENSG00000142920	113451	AZIN2	1	1p35.1	antizyme inhibitor 2	6559	2.10473	2.25e-09	5.21e-07
ENSG00000117600	9890	PLPPR4	1	1p21.2	phospholipid phosphatase related 4	5540	2.10459	0.00010308	0.00107157
ENSG00000152936	160492	LMNTD1	12	12p12.1	lamin tail domain containing 1	3083	2.10376	0.000810842	0.0054209
ENSG00000155530	136332	LRGUK	7	7q33	leucine-rich repeats and guanylate kinase domain containing	3249	2.10258	2.73e-06	7.07e-05
ENSG00000170231	2172	FABP6	5	5q33.3-q34	fatty acid binding protein 6, ileal	1164	2.10025	0.000750017	0.00508505
ENSG00000064692	9627	SNCAIP	5	5q23.2	synuclein alpha interacting protein	7325	2.0985	3.6e-08	3.25e-06
ENSG00000124772	57699	CPNE5	6	6p21.1	copine V	6330	2.09799	4.22e-06	0.000100709
ENSG00000137707	54766	BTG4	11	11q23	BTG family member 4	1801	2.09761	0.000105515	0.00109097
ENSG00000146013	2676	GFRA3	5	5q31.1-q31.3	GDNF family receptor alpha 3	2039	2.09635	0.000157941	0.00147517
ENSG00000105784	154661	RUNDC3B	7	7q21.12	RUN domain containing 3B	4710	2.09119	1.98e-05	0.000314091
ENSG00000211452	1733	DIO1	1	1p33-p32	deiodinase, iodothyronine, type I	2282	2.09022	0.00030715	0.00251238
ENSG00000185652	4908	NTF3	12	12p13	neurotrophin 3	2919	2.08555	1.76e-08	2.05e-06
ENSG00000134460	3559	IL2RA	10	10p15-p14	interleukin 2 receptor subunit alpha	3176	2.08221	1.86e-05	0.000300209
ENSG00000171811	54777	CFAP46	10	10q26.3	cilia and flagella associated protein 46	10561	2.08133	3.59e-05	0.000478826
ENSG00000197353	137797	LYPD2	8	8q24.3	LY6/PLAUR domain containing 2	594	2.08033	0.00214674	0.0118019
ENSG00000154040	26256	CABYR	18	18q11.2	calcium binding tyrosine-(Y)-phosphorylation regulated	3518	2.07609	1.51e-08	1.94e-06
ENSG00000184564	84189	SLITRK6	13	13q31.1	SLIT and NTRK like family member 6	4318	2.0738	0.000454458	0.00340425
ENSG00000089101	26074	CFAP61	20	20p11.23	cilia and flagella associated protein 61	7322	2.07347	0.000190322	0.0017087
ENSG00000175928	57633	LRRN1	3	3p26.2	leucine rich repeat neuronal 1	4264	2.07315	3.6e-06	8.72e-05
ENSG00000128285	2847	MCHR1	22	22q13.2	melanin concentrating hormone receptor 1	2961	2.07195	0.000103258	0.00107259
ENSG00000175426	5122	PCSK1	5	5q15-q21	proprotein convertase subtilisin/kexin type 1	5307	2.07105	0.00022972	0.00198671
ENSG00000197826	255119	C4orf22	4	4q21.21	chromosome 4 open reading frame 22	4478	2.07015	0.00171599	0.00979908
ENSG00000131044	164395	TTLL9	20	20q11.21	tubulin tyrosine ligase like 9	5925	2.0701	4.01e-05	0.000525009
ENSG00000176490	148252	DIRAS1	19	19p13.3	DIRAS family, GTP-binding RAS-like 1	3485	2.06794	5.62e-08	4.52e-06
ENSG00000116032	116444	GRIN3B	19	19p13.3	glutamate receptor, ionotropic, N-methyl-D-aspartate 3B	3281	2.06628	9.82e-05	0.0010328
ENSG00000071539	9319	TRIP13	5	5p15.33	thyroid hormone receptor interactor 13	3560	2.06374	2.5e-06	6.67e-05
ENSG00000155026	222967	RSPH10B	7	7p22.1	radial spoke head 10 homolog B (Chlamydomonas)	4993	2.06021	0.000129123	0.0012668
ENSG00000117407	9048	ARTN	1	1p34.1	artemin	2658	2.05963	6.85e-07	2.65e-05
ENSG00000136449	84073	MYCBPAP	17	17q21.33	MYCBP associated protein	6515	2.05773	5.86e-05	0.000699294
ENSG00000136457	1101	CHAD	17	17q21.33	chondroadherin	1802	2.05629	0.000927111	0.00603296
ENSG00000108176	56521	DNAJC12	10	10q22.1	DnaJ heat shock protein family (Hsp40) member C12	2121	2.05536	4.47e-07	1.95e-05
ENSG00000137558	51050	PI15	8	8q21.11	peptidase inhibitor 15	7156	2.05431	0.00200052	0.0111148
ENSG00000159618	221188	ADGRG5	16	16q21	adhesion G protein-coupled receptor G5	5852	2.05377	1.59e-06	4.77e-05
ENSG00000160469	84446	BRSK1	19	19q13.4	BR serine/threonine kinase 1	3841	2.05369	4.26e-08	3.6e-06
ENSG00000166578	115811	IQCD	12	12q24.13	IQ motif containing D	2460	2.0532	3.25e-05	0.000446721
ENSG00000167992	220001	VWCE	11	11q12.2	von Willebrand factor C and EGF domains	4874	2.05239	2.45e-07	1.29e-05
ENSG00000240204	100287482	SMKR1	7	7q32.1	small lysine-rich protein 1	1035	2.05165	2.1e-05	0.000326739
ENSG00000144583	57574	2021-03-04	2	2q35	membrane associated ring-CH-type finger 4	4447	2.0516	1.64e-06	4.91e-05
ENSG00000186474	43849	KLK12	19	19q13.33	kallikrein related peptidase 12	1769	2.0514	0.00470318	0.0225108
ENSG00000187634	148398	SAMD11	1	1p36.33	sterile alpha motif domain containing 11	3214	2.04895	3.4e-06	8.34e-05
ENSG00000110881	41	ASIC1	12	12q12	acid sensing ion channel subunit 1	5745	2.04803	4.09e-08	3.49e-06
ENSG00000160345	138162	C9orf116	9	9q34.3	chromosome 9 open reading frame 116	1864	2.04756	0.000238554	0.00204992
ENSG00000183395	5367	PMCH	12	12q23.2	pro-melanin concentrating hormone	766	2.04626	5.2e-05	0.000642519
ENSG00000139626	3695	ITGB7	12	12q13.13	integrin subunit beta 7	4481	2.04575	1.26e-07	7.96e-06
ENSG00000087494	5744	PTHLH	12	12p12.1-p11.2	parathyroid hormone-like hormone	3377	2.04569	8.49e-05	0.000925861
ENSG00000170324	143162	FRMPD2	10	10q11.22	FERM and PDZ domain containing 2	7872	2.0454	0.000887642	0.00581557
ENSG00000178031	92949	ADAMTSL1	9	9p21.3	ADAMTS like 1	13172	2.0442	2.39e-05	0.000356471
ENSG00000164099	8492	PRSS12	4	4q28.1	protease, serine 12	5725	2.04395	8.04e-07	2.94e-05
ENSG00000172771	90288	EFCAB12	3	3q21.3	EF-hand calcium binding domain 12	7789	2.04258	4.42e-05	0.000566758
ENSG00000114473	84223	IQCG	3	3q29	IQ motif containing G	7474	2.04117	5.16e-07	2.16e-05
ENSG00000187957	92737	DNER	2	2q36.3	delta/notch like EGF repeat containing	3935	2.04019	0.000116058	0.00117024
ENSG00000124575	3007	HIST1H1D	6	6p21.3	histone cluster 1, H1d	666	2.03491	0.00289058	0.0150362
ENSG00000175267	146177	VWA3A	16	16p12.2	von Willebrand factor A domain containing 3A	5039	2.03488	0.000102144	0.00106514
ENSG00000197653	196385	DNAH10	12	12q24.31	dynein, axonemal, heavy chain 10	16720	2.03426	0.000133506	0.00130314
ENSG00000035720	26228	STAP1	4	4q13.2	signal transducing adaptor family member 1	1655	2.03418	2.22e-05	0.000338872
ENSG00000227507	4050	LTB	6	6p21.3	lymphotoxin beta	1535	2.03323	3.92e-07	1.77e-05
ENSG00000162931	51127	TRIM17	1	1q42	tripartite motif containing 17	3548	2.03067	1.79e-07	1.03e-05
ENSG00000157470	145773	FAM81A	15	15q22.2	family with sequence similarity 81 member A	5578	2.02989	7.31e-07	2.75e-05
ENSG00000132744	91703	ACY3	11	11q13.2	aminoacylase 3	1300	2.02889	1.4e-06	4.32e-05
ENSG00000137691	85016	C11orf70	11	11q22.1	chromosome 11 open reading frame 70	2647	2.0281	3.38e-05	0.000462438
ENSG00000198794	192683	SCAMP5	15	15q24.2	secretory carrier membrane protein 5	4873	2.02458	3.1e-08	2.96e-06
ENSG00000197584	10242	KCNMB2	3	3q26.32	potassium channel subfamily M regulatory beta subunit 2	3542	2.02432	2.93e-06	7.44e-05
ENSG00000197977	54898	ELOVL2	6	6p24.2	ELOVL fatty acid elongase 2	3997	2.0235	0.000799776	0.00536018
ENSG00000102096	11040	PIM2	X	Xp11.23	Pim-2 proto-oncogene, serine/threonine kinase	2761	2.02319	3.17e-06	7.87e-05
ENSG00000178562	940	CD28	2	2q33	CD28 molecule	4885	2.02219	1.67e-05	0.000279379
ENSG00000103316	1428	CRYM	16	16p12.2	crystallin mu	3782	2.02131	2.79e-07	1.42e-05
ENSG00000143387	1513	CTSK	1	1q21	cathepsin K	1887	2.02111	8.45e-07	3.04e-05
ENSG00000114547	152015	ROPN1B	3	3q21.2	rhophilin associated tail protein 1B	4048	2.02043	2.15e-05	0.000332098
ENSG00000130176	1264	CNN1	19	19p13.2-p13.1	calponin 1, basic, smooth muscle	2887	2.01623	1.29e-06	4.07e-05
ENSG00000135447	5502	PPP1R1A	12	12q13.2	protein phosphatase 1 regulatory inhibitor subunit 1A	3982	2.01266	0.000145506	0.00138996
ENSG00000151572	121601	ANO4	12	12q23.1	anoctamin 4	4997	2.01212	3.56e-05	0.000476818
ENSG00000197889	644890	MEIG1	10	10p13	meiosis/spermiogenesis associated 1	1407	2.01031	0.000204786	0.00182327
ENSG00000128408	26150	RIBC2	22	22q13.31	RIB43A domain with coiled-coils 2	1815	2.00874	8.88e-05	0.000957183
ENSG00000157423	54768	HYDIN	16	16q22.2	HYDIN, axonemal central pair apparatus protein	23408	2.00845	0.000348577	0.0027719
ENSG00000054598	2296	FOXC1	6	6p25	forkhead box C1	3926	2.00801	2.33e-08	2.44e-06
ENSG00000170209	255239	ANKK1	11	11q23.2	ankyrin repeat and kinase domain containing 1	2598	2.00778	7.81e-05	0.000871733
ENSG00000141052	93649	MYOCD	17	17p11.2	myocardin	8875	2.00687	2.2e-07	1.21e-05
ENSG00000150773	120379	PIH1D2	11	11q23.1	PIH1 domain containing 2	2474	2.0059	1.39e-05	0.000245624
ENSG00000139155	53919	SLCO1C1	12	12p12.2	solute carrier organic anion transporter family member 1C1	4860	2.0044	6.92e-05	0.000788835
ENSG00000129295	23639	LRRC6	8	8q24.22	leucine rich repeat containing 6	2778	2.00418	1.31e-06	4.11e-05
ENSG00000126787	9787	DLGAP5	14	14q22.3	discs, large (Drosophila) homolog-associated protein 5	3667	2.00387	2.27e-06	6.27e-05
ENSG00000117650	4751	NEK2	1	1q32.3	NIMA-related kinase 2	3095	2.00375	6.26e-07	2.46e-05
ENSG00000151892	2674	GFRA1	10	10q26.11	GDNF family receptor alpha 1	9678	2.00309	5.98e-06	0.000129944
ENSG00000102970	6361	CCL17	16	16q13	chemokine (C-C motif) ligand 17	620	2.0016	7.97e-05	0.000885333
ENSG00000158113	254050	LRRC43	12	12q24.31	leucine rich repeat containing 43	2775	2.00095	0.00010917	0.00112014
ENSG00000244607	152206	CCDC13	3	3p22.1	coiled-coil domain containing 13	4966	1.99889	4.69e-07	2.03e-05
ENSG00000156738	931	MS4A1	11	11q12	membrane-spanning 4-domains, subfamily A, member 1	4872	1.99782	0.00486545	0.0231566
ENSG00000004848	170302	ARX	X	Xp21.3	aristaless related homeobox	2876	1.99605	0.000441727	0.00332744
ENSG00000198944	134548	SOWAHA	5	5q31.1	sosondowah ankyrin repeat domain family member A	3211	1.99595	4.96e-06	0.000113278
ENSG00000196220	9901	SRGAP3	3	3p25.3	SLIT-ROBO Rho GTPase activating protein 3	18924	1.99592	1.57e-05	0.000267519
ENSG00000244094	6705	SPRR2F	1	1q21-q22	small proline-rich protein 2F	681	1.99509	0.00538057	0.0251012
ENSG00000167094	158248	TTC16	9	9q34.11	tetratricopeptide repeat domain 16	6370	1.9935	0.000177469	0.0016149
ENSG00000142609	85452	CFAP74	1	1p36.33	cilia and flagella associated protein 74	10422	1.99284	0.000277204	0.00230963
ENSG00000167080	124872	B4GALNT2	17	17q21.32	beta-1,4-N-acetyl-galactosaminyl transferase 2	8961	1.99185	0.000410365	0.00314052
ENSG00000100298	164668	APOBEC3H	22	22q13.1	apolipoprotein B mRNA editing enzyme, catalytic polypeptide-like 3H	1251	1.99178	6.17e-07	2.44e-05
ENSG00000008323	55200	PLEKHG6	12	12p13.31	pleckstrin homology and RhoGEF domain containing G6	4260	1.98987	2.95e-08	2.89e-06
ENSG00000198885	150771	ITPRIPL1	2	2q11.2	inositol 1,4,5-trisphosphate receptor interacting protein-like 1	4652	1.98864	8.57e-08	6.09e-06
ENSG00000102802	84935	MEDAG	13	13q12.3	mesenteric estrogen-dependent adipogenesis	2374	1.98267	0.000921625	0.00600764
ENSG00000064300	4804	NGFR	17	17q21-q22	nerve growth factor receptor	4150	1.97892	7.81e-06	0.000159468
ENSG00000138696	658	BMPR1B	4	4q22-q24	bone morphogenetic protein receptor type IB	6312	1.97806	3e-05	0.000420833
ENSG00000198553	283518	KCNRG	13	13q14.2	potassium channel regulator	1625	1.97769	2.5e-05	0.000369162
ENSG00000039537	729	C6	5	5p13	complement component 6	4739	1.97618	8.96e-05	0.000964102
ENSG00000042980	10863	ADAM28	8	8p21.2	ADAM metallopeptidase domain 28	9351	1.97522	7.59e-06	0.000156556
ENSG00000135519	23416	KCNH3	12	12q13	potassium channel, voltage gated eag related subfamily H, member 3	4265	1.97451	0.000170992	0.00156979
ENSG00000117122	4237	MFAP2	1	1p36.1-p35	microfibrillar associated protein 2	2915	1.9704	9.94e-08	6.76e-06
ENSG00000181143	94025	MUC16	19	19p13.2	mucin 16, cell surface associated	43830	1.96923	0.00495289	0.0234646
ENSG00000145491	83853	ROPN1L	5	5p15.2	rhophilin associated tail protein 1-like	1817	1.96612	0.00180178	0.0102022
ENSG00000091513	7018	TF	3	3q22.1	transferrin	8565	1.96518	0.00308669	0.0158779
ENSG00000152049	23704	KCNE4	2	2q36.1	potassium channel, voltage gated subfamily E regulatory beta subunit 4	4124	1.96462	8.87e-06	0.000175257
ENSG00000144730	54756	IL17RD	3	3p14.3	interleukin 17 receptor D	9561	1.96434	4.09e-06	9.83e-05
ENSG00000044524	2042	EPHA3	3	3p11.2	EPH receptor A3	6674	1.96375	0.000405996	0.00311418
ENSG00000117152	5999	RGS4	1	1q23.3	regulator of G-protein signaling 4	4836	1.96348	8.94e-05	0.000963039
ENSG00000147889	1029	CDKN2A	9	9p21	cyclin-dependent kinase inhibitor 2A	4329	1.96329	1.72e-07	1.01e-05
ENSG00000157578	150082	LCA5L	21	21q22.2	Leber congenital amaurosis 5-like	5841	1.96234	7.05e-06	0.000148328
ENSG00000271503	6352	CCL5	17	17q12	chemokine (C-C motif) ligand 5	1512	1.95833	0.000191056	0.00171414
ENSG00000165730	219736	STOX1	10	10q22.1	storkhead box 1	3568	1.95785	0.00028168	0.00233822
ENSG00000112984	10112	KIF20A	5	5q31	kinesin family member 20A	3958	1.95528	9.28e-07	3.21e-05
ENSG00000126861	4974	OMG	17	17q11.2	oligodendrocyte myelin glycoprotein	3837	1.95301	0.00107873	0.00677152
ENSG00000134247	5738	PTGFRN	1	1p13.1	prostaglandin F2 receptor inhibitor	6352	1.95292	3.69e-08	3.29e-06
ENSG00000186197	128178	EDARADD	1	1q42.3	EDAR-associated death domain	3726	1.95289	2.5e-07	1.31e-05
ENSG00000125285	11166	SOX21	13	13q32.1	SRY-box 21	2778	1.9525	0.00283862	0.0147888
ENSG00000205084	79583	TMEM231	16	16q23.1	transmembrane protein 231	6015	1.94874	1.66e-05	0.000278309
ENSG00000180914	5021	OXTR	3	3p25	oxytocin receptor	4514	1.94806	0.0026754	0.0141358
ENSG00000196188	1510	CTSE	1	1q31	cathepsin E	2671	1.94747	2.21e-06	6.12e-05
ENSG00000175877	135886	WBSCR28	7	7q11.23	Williams-Beuren syndrome chromosome region 28	977	1.94559	0.000607025	0.00428651
ENSG00000157766	176	ACAN	15	15q26.1	aggrecan	10908	1.94506	0.00043996	0.00331599
ENSG00000123243	80760	ITIH5	10	10p14	inter-alpha-trypsin inhibitor heavy chain family member 5	14628	1.9445	4.7e-07	2.03e-05
ENSG00000135919	5270	SERPINE2	2	2q36.1	serpin peptidase inhibitor, clade E (nexin, plasminogen activator inhibitor type 1), member 2	8891	1.94448	8.57e-07	3.06e-05
ENSG00000110400	5818	PVRL1	11	11q23.3	poliovirus receptor-related 1 (herpesvirus entry mediator C)	7701	1.94351	7.58e-08	5.66e-06
ENSG00000125531	79025	C20orf195	20	20q13.33	chromosome 20 open reading frame 195	3625	1.94229	6.88e-06	0.000146167
ENSG00000127241	5648	MASP1	3	3q27-q28	mannan-binding lectin serine peptidase 1 (C4/C2 activating component of Ra-reactive factor)	13161	1.94099	3.22e-05	0.000445156
ENSG00000173013	257236	CCDC96	4	4p16.1	coiled-coil domain containing 96	2091	1.93973	1.55e-05	0.000264174
ENSG00000134873	9071	CLDN10	13	13q31-q34	claudin 10	3380	1.93952	0.000126731	0.00125064
ENSG00000143603	3782	KCNN3	1	1q21.3	potassium channel, calcium activated intermediate/small conductance subfamily N alpha, member 3	13598	1.93944	1.74e-07	1.01e-05
ENSG00000277632	6348	CCL3	17	17q12	chemokine (C-C motif) ligand 3	1494	1.93941	4.27e-06	0.000101758
ENSG00000029993	3149	HMGB3	X	Xq28	high mobility group box 3	3967	1.93709	7.42e-08	5.6e-06
ENSG00000169402	728194	RSPH10B2	7	7p22.1	radial spoke head 10 homolog B2 (Chlamydomonas)	4992	1.93665	0.00101604	0.00645526
ENSG00000158163	199221	DZIP1L	3	3q22.3	DAZ interacting zinc finger protein 1-like	5045	1.93272	3.61e-07	1.67e-05
ENSG00000172955	130	ADH6	4	4q23	alcohol dehydrogenase 6 (class V)	4401	1.93235	0.00386037	0.0191253
ENSG00000128342	3976	LIF	22	22q12.2	leukemia inhibitory factor	3969	1.93065	0.000154938	0.00145726
ENSG00000164920	116039	OSR2	8	8q22.2	odd-skipped related transciption factor 2	2930	1.9303	9.9e-07	3.36e-05
ENSG00000115353	6869	TACR1	2	2p12	tachykinin receptor 1	5308	1.92809	2.92e-06	7.43e-05
ENSG00000198535	145741	C2CD4A	15	15q22.2	C2 calcium-dependent domain containing 4A	3445	1.92307	0.00280918	0.014681
ENSG00000075035	9671	WSCD2	12	12q23.3	WSC domain containing 2	6557	1.92239	1.7e-06	5.07e-05
ENSG00000182463	128553	TSHZ2	20	20q13.2	teashirt zinc finger homeobox 2	12581	1.92033	4.66e-06	0.000109154
ENSG00000151575	374618	TEX9	15	15q21.3	testis expressed 9	8290	1.91969	0.000142853	0.00137243
ENSG00000175352	56675	NRIP3	11	11p15.3	nuclear receptor interacting protein 3	4123	1.91954	2.01e-07	1.14e-05
ENSG00000135424	3679	ITGA7	12	12q13	integrin subunit alpha 7	6373	1.91754	1.92e-07	1.09e-05
ENSG00000167618	3904	LAIR2	19	19q13.4	leukocyte-associated immunoglobulin-like receptor 2	1078	1.9169	4.34e-06	0.000102878
ENSG00000255974	1548	CYP2A6	19	19q13.2	cytochrome P450 family 2 subfamily A member 6	2316	1.91518	0.0103006	0.0420508
ENSG00000107130	23413	NCS1	9	9q34	neuronal calcium sensor 1	5289	1.91465	1.18e-08	1.61e-06
ENSG00000111837	4117	MAK	6	6p24	male germ cell-associated kinase	4226	1.91379	2.3e-06	6.29e-05
ENSG00000118513	4602	MYB	6	6q22-q23	v-myb avian myeloblastosis viral oncogene homolog	5493	1.91258	8.64e-05	0.00093957
ENSG00000179869	154664	ABCA13	7	7p12.3	ATP binding cassette subfamily A member 13	19074	1.91121	0.00046542	0.00346896
ENSG00000132746	222	ALDH3B2	11	11q13	aldehyde dehydrogenase 3 family member B2	3235	1.91072	0.000356086	0.00280669
ENSG00000008226	9940	DLEC1	3	3p21.3	deleted in lung and esophageal cancer 1	8338	1.90997	0.000188409	0.00169316
ENSG00000114670	79858	NEK11	3	3q22.1	NIMA-related kinase 11	5355	1.90965	1.09e-06	3.63e-05
ENSG00000160963	136227	COL26A1	7	7q22.1	collagen, type XXVI, alpha 1	3156	1.90889	4.03e-05	0.00052724
ENSG00000087258	2775	GNAO1	16	16q13	guanine nucleotide binding protein (G protein), alpha activating activity polypeptide O	9813	1.908	3.19e-05	0.000443279
ENSG00000159239	388963	C2orf81	2	2p13.1	chromosome 2 open reading frame 81	2995	1.90549	8.07e-06	0.000163546
ENSG00000010932	2326	FMO1	1	1q24.3	flavin containing monooxygenase 1	3602	1.90526	2.85e-05	0.000408127
ENSG00000124664	25803	SPDEF	6	6p21.3	SAM pointed domain containing ETS transcription factor	1914	1.9039	0.000116719	0.00117515
ENSG00000151136	121551	BTBD11	12	12q23.3	BTB (POZ) domain containing 11	7924	1.9025	7.55e-07	2.8e-05
ENSG00000187260	349136	WDR86	7	7q36.1	WD repeat domain 86	4044	1.90041	7.47e-07	2.79e-05
ENSG00000186810	2833	CXCR3	X	Xq13	chemokine (C-X-C motif) receptor 3	1868	1.89871	0.000172236	0.00157689
ENSG00000140009	2100	ESR2	14	14q23.2	estrogen receptor 2 (ER beta)	9337	1.89745	0.000361964	0.00284243
ENSG00000085563	5243	ABCB1	7	7q21.12	ATP binding cassette subfamily B member 1	5806	1.89463	6.94e-05	0.000789836
ENSG00000050730	79931	TNIP3	4	4q27	TNFAIP3 interacting protein 3	3768	1.89292	0.000377864	0.00294892
ENSG00000137968	204962	SLC44A5	1	1p31.1	solute carrier family 44 member 5	6299	1.89285	0.0046573	0.0223471
ENSG00000104435	11075	STMN2	8	8q21.13	stathmin 2	2362	1.88904	0.000400031	0.00307545
ENSG00000173947	128344	PIFO	1	1p13.2	primary cilia formation	4261	1.88851	8.12e-05	0.000896606
ENSG00000100228	9609	RAB36	22	22q11.22	RAB36, member RAS oncogene family	4107	1.88835	5.54e-07	2.25e-05
ENSG00000162849	55083	KIF26B	1	1q44	kinesin family member 26B	14403	1.88808	6.91e-06	0.000146381
ENSG00000188596	144535	CFAP54	12	12q23.1	cilia and flagella associated 54	12719	1.88758	0.000164089	0.00151782
ENSG00000180828	27319	BHLHE22	8	8q13	basic helix-loop-helix family member e22	3262	1.88722	2.92e-05	0.0004143
ENSG00000148357	256158	HMCN2	9	9q34.11	hemicentin 2	20363	1.88569	4.06e-05	0.000528704
ENSG00000101197	79444	BIRC7	20	20q13.3	baculoviral IAP repeat containing 7	1562	1.88232	0.000115951	0.00117005
ENSG00000135052	51280	GOLM1	9	9q21.33	golgi membrane protein 1	4233	1.88084	1.9e-08	2.15e-06
ENSG00000007312	974	CD79B	17	17q23	CD79b molecule	2080	1.88019	3.07e-06	7.71e-05
ENSG00000249992	25907	TMEM158	3	3p21.3	transmembrane protein 158 (gene/pseudogene)	1813	1.87922	1.42e-08	1.87e-06
ENSG00000197361	283807	FBXL22	15	15q22.31	F-box and leucine-rich repeat protein 22	3614	1.87779	1.84e-06	5.34e-05
ENSG00000196092	5079	PAX5	9	9p13	paired box 5	9333	1.8776	0.000666034	0.00461584
ENSG00000170959	341019	DCDC1	11	11p13	doublecortin domain containing 1	13160	1.87727	0.000296664	0.00244898
ENSG00000105792	79846	CFAP69	7	7q21.13	cilia and flagella associated protein 69	9139	1.87663	0.000106803	0.0011009
ENSG00000153237	130940	CCDC148	2	2q24.1	coiled-coil domain containing 148	3790	1.87567	0.000215164	0.00189004
ENSG00000165125	55503	TRPV6	7	7q34	transient receptor potential cation channel, subfamily V, member 6	11925	1.87503	5.24e-06	0.000117535
ENSG00000115226	64838	FNDC4	2	2p23.3	fibronectin type III domain containing 4	1982	1.87305	3.39e-08	3.12e-06
ENSG00000105205	1178	CLC	19	19q13.1	Charcot-Leyden crystal galectin	635	1.87167	0.00989709	0.0406632
ENSG00000140511	145864	HAPLN3	15	15q26.1	hyaluronan and proteoglycan link protein 3	3524	1.87108	7.32e-07	2.75e-05
ENSG00000111218	56341	PRMT8	12	12p13.3	protein arginine methyltransferase 8	6644	1.87035	2.95e-05	0.000416972
ENSG00000119636	80127	BBOF1	14	14q24.3	basal body orientation factor 1	4620	1.86944	1.2e-05	0.00021899
ENSG00000127863	55504	TNFRSF19	13	13q12.11-q12.3	tumor necrosis factor receptor superfamily member 19	5113	1.86782	2.29e-06	6.29e-05
ENSG00000170961	3037	HAS2	8	8q24.12	hyaluronan synthase 2	4190	1.86587	0.00240549	0.0129491
ENSG00000176153	2877	GPX2	14	14q24.1	glutathione peroxidase 2	1499	1.86245	7.33e-05	0.000825393
ENSG00000127152	64919	BCL11B	14	14q32.2	B-cell CLL/lymphoma 11B (zinc finger protein)	7855	1.86118	1.74e-05	0.000287785
ENSG00000158423	158787	RIBC1	X	Xp11.22	RIB43A domain with coiled-coils 1	2993	1.85841	0.00010367	0.00107521
ENSG00000176945	200958	MUC20	3	3q29	mucin 20, cell surface associated	4249	1.85499	7.72e-06	0.000158323
ENSG00000154760	146857	SLFN13	17	17q12	schlafen family member 13	9329	1.8548	1.3e-06	4.11e-05
ENSG00000132464	10117	ENAM	4	4q13.3	enamelin	6522	1.85428	0.00011474	0.00116045
ENSG00000130822	139728	PNCK	X	Xq28	pregnancy up-regulated nonubiquitous CaM kinase	5091	1.85406	5.47e-05	0.000669116
ENSG00000108001	253738	EBF3	10	10q26.3	early B-cell factor 3	4623	1.85336	0.000465367	0.00346896
ENSG00000088726	55287	TMEM40	3	3p25.2	transmembrane protein 40	3562	1.85283	0.00101213	0.0064367
ENSG00000175600	79783	SUGCT	7	7p14.1	succinyl-CoA:glutarate-CoA transferase	2857	1.85056	2.82e-08	2.85e-06
ENSG00000186976	64800	EFCAB6	22	22q13.2	EF-hand calcium binding domain 6	8557	1.84925	7.68e-06	0.000158167
ENSG00000113805	5067	CNTN3	3	3p12.3	contactin 3	5109	1.8475	1.61e-05	0.000272002
ENSG00000010626	10233	LRRC23	12	12p13	leucine rich repeat containing 23	3054	1.84511	4.24e-05	0.00054809
ENSG00000181085	225689	MAPK15	8	-	mitogen-activated protein kinase 15	3056	1.84456	8.44e-05	0.000923247
ENSG00000169271	8988	HSPB3	5	5q11.2	heat shock protein family B (small) member 3	784	1.84432	6.32e-06	0.000136509
ENSG00000148344	9536	PTGES	9	9q34.3	prostaglandin E synthase	1896	1.84107	1.97e-06	5.61e-05
ENSG00000124256	81030	ZBP1	20	20q13.31	Z-DNA binding protein 1	5405	1.84005	4.13e-05	0.000536914
ENSG00000124343	7499	XG	X	Xp22.33	Xg blood group	2774	1.83989	2.71e-05	0.000391994
ENSG00000204060	100132074	FOXO6	1	1p34.2	forkhead box O6	2398	1.83755	9.35e-07	3.21e-05
ENSG00000108691	6347	CCL2	17	17q11.2-q12	chemokine (C-C motif) ligand 2	1986	1.82917	0.000504563	0.00369912
ENSG00000171757	151827	LRRC34	3	3q26.2	leucine rich repeat containing 34	4851	1.8261	0.000112636	0.00114434
ENSG00000171951	7857	SCG2	2	2q35-q36	secretogranin II	2719	1.82436	4.22e-05	0.000547121
ENSG00000007516	8938	BAIAP3	16	16p13.3	BAI1-associated protein 3	6146	1.82371	0.00129343	0.00781115
ENSG00000148346	3934	LCN2	9	9q34	lipocalin 2	1598	1.82363	0.00125055	0.00760148
ENSG00000132470	3691	ITGB4	17	17q25	integrin subunit beta 4	6761	1.82335	1.53e-06	4.64e-05
ENSG00000156475	5521	PPP2R2B	5	5q32	protein phosphatase 2 regulatory subunit B, beta	13206	1.82289	1.58e-07	9.46e-06
ENSG00000165698	11092	C9orf9	9	9q34	chromosome 9 open reading frame 9	2823	1.82282	1.87e-05	0.000301229
ENSG00000137078	27240	SIT1	9	9p13-p12	signaling threshold regulating transmembrane adaptor 1	1327	1.82167	1.11e-05	0.000206035
ENSG00000164638	222962	SLC29A4	7	7p22.1	solute carrier family 29 (equilibrative nucleoside transporter), member 4	5811	1.82053	5.2e-06	0.000116982
ENSG00000105880	1749	DLX5	7	7q22	distal-less homeobox 5	1895	1.82046	8.88e-05	0.000957183
ENSG00000198523	5350	PLN	6	6q22.1	phospholamban	2001	1.81322	0.000504437	0.00369912
ENSG00000161381	57125	PLXDC1	17	17q21.1	plexin domain containing 1	9277	1.8093	9.11e-07	3.19e-05
ENSG00000150594	150	ADRA2A	10	10q25.2	adrenoceptor alpha 2A	3745	1.80915	7.93e-07	2.91e-05
ENSG00000198759	25975	EGFL6	X	Xp22	EGF-like-domain, multiple 6	2607	1.80614	3.07e-05	0.000429997
ENSG00000182752	5069	PAPPA	9	9q33.2	pregnancy-associated plasma protein A, pappalysin 1	11573	1.80528	0.000646032	0.00450045
ENSG00000168542	1281	COL3A1	2	2q31	collagen, type III, alpha 1	6811	1.8034	0.000173294	0.00158442
ENSG00000151468	83643	CCDC3	10	10p13	coiled-coil domain containing 3	3683	1.80309	3.32e-06	8.19e-05
ENSG00000184949	646851	FAM227A	22	22q13.1	family with sequence similarity 227 member A	10781	1.80164	0.000814967	0.00544568
ENSG00000102230	9468	PCYT1B	X	Xp22.11	phosphate cytidylyltransferase 1, choline, beta	5555	1.79885	9.26e-06	0.000179174
ENSG00000111186	81029	WNT5B	12	12p13.3	wingless-type MMTV integration site family member 5B	4305	1.79353	2.13e-07	1.18e-05
ENSG00000189366	200810	ALG1L	3	3q21.2	ALG1, chitobiosyldiphosphodolichol beta-mannosyltransferase-like	843	1.79218	0.000119083	0.00119149
ENSG00000141753	3487	IGFBP4	17	17q21.2	insulin like growth factor binding protein 4	2200	1.79132	2.27e-08	2.42e-06
ENSG00000140057	122481	AK7	14	14q32.2	adenylate kinase 7	5001	1.79051	8.98e-06	0.000176558
ENSG00000260428	642658	SCX	8	8q24.3	scleraxis bHLH transcription factor	999	1.78997	3.93e-06	9.5e-05
ENSG00000143318	844	CASQ1	1	1q21	calsequestrin 1	2176	1.78817	3.77e-05	0.000498212
ENSG00000156042	118491	CFAP70	10	10q22.2	cilia and flagella associated protein 70	7428	1.78682	0.000354429	0.00279855
ENSG00000005448	84058	WDR54	2	2p13.1	WD repeat domain 54	2860	1.78569	1.09e-05	0.000203698
ENSG00000096093	114327	EFHC1	6	6p12.3	EF-hand domain (C-terminal) containing 1	7162	1.78561	1.47e-05	0.00025528
ENSG00000183508	54855	FAM46C	1	1p12	family with sequence similarity 46 member C	5751	1.78267	2.19e-06	6.11e-05
ENSG00000160185	53347	UBASH3A	21	21q22.3	ubiquitin associated and SH3 domain containing A	3915	1.7781	6.73e-05	0.000770246
ENSG00000105928	1687	DFNA5	7	7p15	deafness, autosomal dominant 5	8897	1.77632	1.49e-07	9.03e-06
ENSG00000179954	284297	SSC5D	19	19q13.42	scavenger receptor cysteine rich family, 5 domains	7314	1.77598	0.000270672	0.00226787
ENSG00000072952	10335	MRVI1	11	11p15	murine retrovirus integration site 1 homolog	7700	1.77355	9.3e-07	3.21e-05
ENSG00000183833	89876	MAATS1	3	3q13.33	MYCBP-associated, testis expressed 1	7106	1.77272	0.0003229	0.00260473
ENSG00000131080	60401	EDA2R	X	Xq12	ectodysplasin A2 receptor	3579	1.77269	0.000155559	0.00145969
ENSG00000171631	5031	P2RY6	11	11q13.4	pyrimidinergic receptor P2Y, G-protein coupled, 6	3976	1.77205	2.13e-09	5.07e-07
ENSG00000149633	85449	KIAA1755	20	20q11.23	KIAA1755	8083	1.77195	5.69e-05	0.000685117
ENSG00000134317	29841	GRHL1	2	2p25.1	grainyhead-like transcription factor 1	7952	1.77174	6.78e-07	2.63e-05
ENSG00000145075	339829	CCDC39	3	3q26.33	coiled-coil domain containing 39	7695	1.76748	0.000711116	0.00486303
ENSG00000204385	80736	SLC44A4	6	6p21.3	solute carrier family 44 member 4	3369	1.76639	9.17e-06	0.000178524
ENSG00000172116	926	CD8B	2	2p12	CD8b molecule	1864	1.76264	0.000110876	0.00113074
ENSG00000067840	57595	PDZD4	X	Xq28	PDZ domain containing 4	4341	1.75995	1.24e-06	3.98e-05
ENSG00000128594	64101	LRRC4	7	7q31.3	leucine rich repeat containing 4	4036	1.75865	1.84e-06	5.34e-05
ENSG00000166963	4130	MAP1A	15	15q15.3	microtubule associated protein 1A	10629	1.75697	1.53e-05	0.000262922
ENSG00000082497	56256	SERTAD4	1	1q32.1-q41	SERTA domain containing 4	5467	1.75687	1.98e-06	5.61e-05
ENSG00000169435	166824	RASSF6	4	4q13.3	Ras association (RalGDS/AF-6) domain family member 6	6632	1.75681	0.00074246	0.00504399
ENSG00000072195	10290	SPEG	2	2q35	SPEG complex locus	17910	1.75514	7.23e-06	0.000151506
ENSG00000196118	90835	CCDC189	16	16p11.2	coiled-coil domain containing 189	3081	1.75481	1.84e-05	0.000298161
ENSG00000157456	9133	CCNB2	15	15q22.2	cyclin B2	2801	1.75414	3.6e-07	1.67e-05
ENSG00000198919	9666	DZIP3	3	3q13.13	DAZ interacting zinc finger protein 3	6972	1.75372	1.25e-05	0.00022418
ENSG00000138135	9023	CH25H	10	10q23	cholesterol 25-hydroxylase	1686	1.75368	2.58e-06	6.82e-05
ENSG00000170835	1056	CEL	9	9q34.3	carboxyl ester lipase	2681	1.753	0.000378427	0.0029516
ENSG00000050628	5733	PTGER3	1	1p31.2	prostaglandin E receptor 3	9653	1.75179	1.96e-05	0.000312072
ENSG00000171533	4135	MAP6	11	11q13.5	microtubule associated protein 6	6433	1.75032	9.2e-06	0.000178742
ENSG00000167216	83473	KATNAL2	18	18q21.1	katanin p60 subunit A-like 2	4783	1.74912	1.06e-05	0.000198545
ENSG00000160298	54058	C21orf58	21	21q22.3	chromosome 21 open reading frame 58	5315	1.74518	0.000135685	0.00131675
ENSG00000184357	3009	HIST1H1B	6	6p22.1	histone cluster 1, H1b	681	1.74392	0.000549702	0.00395662
ENSG00000130528	3270	HRC	19	19q13.3	histidine rich calcium binding protein	2685	1.74351	5.17e-05	0.000641752
ENSG00000066382	744	MPPED2	11	11p13	metallophosphoesterase domain containing 2	8197	1.74238	1.64e-06	4.91e-05
ENSG00000064199	53340	SPA17	11	11q24.2	sperm autoantigenic protein 17	5205	1.74045	2.82e-06	7.23e-05
ENSG00000135916	81618	ITM2C	2	2q37	integral membrane protein 2C	2611	1.74019	2.38e-07	1.26e-05
ENSG00000145362	287	ANK2	4	4q25-q27	ankyrin 2, neuronal	18224	1.73927	0.000332744	0.00266493
ENSG00000111664	2784	GNB3	12	12p13	guanine nucleotide binding protein (G protein), beta polypeptide 3	3437	1.73901	2.44e-05	0.000361803
ENSG00000124813	860	RUNX2	6	6p21	runt-related transcription factor 2	8192	1.73795	1.51e-06	4.62e-05
ENSG00000137285	347733	TUBB2B	6	6p25	tubulin beta 2B class IIb	2194	1.73787	9.17e-06	0.000178524
ENSG00000161040	222235	FBXL13	7	7q22.1	F-box and leucine-rich repeat protein 13	4009	1.73786	2.37e-05	0.000355104
ENSG00000166676	780776	TVP23A	16	16p13.13	trans-golgi network vesicle protein 23 homolog A (S. cerevisiae)	5281	1.73654	4.88e-06	0.0001124
ENSG00000017427	3479	IGF1	12	12q23.2	insulin like growth factor 1	8087	1.73567	0.00204177	0.0113085
ENSG00000186638	347240	KIF24	9	9p13.3	kinesin family member 24	6226	1.73431	4.91e-07	2.09e-05
ENSG00000049323	4052	LTBP1	2	2p22-p21	latent transforming growth factor beta binding protein 1	7329	1.73208	2.63e-06	6.91e-05
ENSG00000130300	83483	PLVAP	19	19p13.2	plasmalemma vesicle associated protein	2305	1.73021	3.45e-05	0.000466573
ENSG00000133710	11005	SPINK5	5	5q32	serine peptidase inhibitor, Kazal type 5	4381	1.72819	3.86e-05	0.000507874
ENSG00000140403	55466	DNAJA4	15	15q25.1	DnaJ heat shock protein family (Hsp40) member A4	6591	1.7278	9.02e-06	0.000176696
ENSG00000167371	112476	PRRT2	16	16p11.2	proline-rich transmembrane protein 2	3573	1.72599	5.01e-05	0.000624358
ENSG00000168077	51435	SCARA3	8	8p21	scavenger receptor class A member 3	4031	1.72433	1.91e-06	5.47e-05
ENSG00000184154	220074	LRTOMT	11	11q13.4	leucine rich transmembrane and O-methyltransferase domain containing	6144	1.72408	2.98e-05	0.000419798
ENSG00000060140	55359	STYK1	12	12p13.2	serine/threonine/tyrosine kinase 1	3424	1.72245	1.83e-07	1.04e-05
ENSG00000137077	6366	CCL21	9	9p13	chemokine (C-C motif) ligand 21	924	1.72011	5.67e-05	0.000684252
ENSG00000162975	3754	KCNF1	2	2p25	potassium channel, voltage gated modifier subfamily F, member 1	2289	1.71886	4.42e-05	0.000566758
ENSG00000088882	56265	CPXM1	20	20p13	carboxypeptidase X (M14 family), member 1	2391	1.71687	0.00296497	0.0153399
ENSG00000138185	953	ENTPD1	10	10q24	ectonucleoside triphosphate diphosphohydrolase 1	6975	1.71619	1.4e-07	8.68e-06
ENSG00000123560	5354	PLP1	X	Xq22	proteolipid protein 1	6078	1.71424	7.13e-06	0.000149932
ENSG00000116299	57535	KIAA1324	1	1p13.3	KIAA1324	9300	1.71374	0.000112254	0.00114132
ENSG00000197565	1288	COL4A6	X	Xq22	collagen, type IV, alpha 6	9282	1.7137	5.33e-05	0.000655272
ENSG00000135245	29923	HILPDA	7	7q32.1	hypoxia inducible lipid droplet-associated	2070	1.71276	5.05e-07	2.13e-05
ENSG00000204052	221424	LRRC73	6	6p21.1	leucine rich repeat containing 73	2121	1.71139	7.71e-05	0.000862685
ENSG00000163959	200931	SLC51A	3	3q29	solute carrier family 51 alpha subunit	5293	1.70958	0.00285268	0.0148563
ENSG00000181195	5179	PENK	8	8q23-q24	proenkephalin	3455	1.70896	0.00115894	0.00717864
ENSG00000196338	54413	NLGN3	X	Xq13.1	neuroligin 3	4006	1.70862	4.98e-06	0.00011362
ENSG00000172548	348938	NIPAL4	5	5q33.3	NIPA-like domain containing 4	4208	1.70685	0.000226178	0.00195987
ENSG00000151952	121256	TMEM132D	12	12q24.33	transmembrane protein 132D	7094	1.70126	0.00428048	0.0208831
ENSG00000104951	259307	IL4I1	19	19q13.3-q13.4	interleukin 4 induced 1	2563	1.70071	5.56e-05	0.000677064
ENSG00000205838	153657	TTC23L	5	5p13.2	tetratricopeptide repeat domain 23-like	4289	1.7004	0.00015435	0.00145304
ENSG00000006128	6863	TAC1	7	7q21-q22	tachykinin precursor 1	1888	1.6983	0.00361038	0.0180937
ENSG00000164938	94241	TP53INP1	8	8q22	tumor protein p53 inducible nuclear protein 1	5676	1.69572	3.47e-05	0.000467812
ENSG00000179750	9582	APOBEC3B	22	22q13.1-q13.2	apolipoprotein B mRNA editing enzyme, catalytic polypeptide-like 3B	1896	1.69452	4.55e-06	0.000106869
ENSG00000149294	4684	NCAM1	11	11q23.1	neural cell adhesion molecule 1	12737	1.69396	5.82e-06	0.000127454
ENSG00000152582	79925	SPEF2	5	5p13.2	sperm flagellar 2	14887	1.6909	7.9e-05	0.000880506
ENSG00000109881	91057	CCDC34	11	11p14.1	coiled-coil domain containing 34	3733	1.68918	1.41e-07	8.74e-06
ENSG00000029153	56938	ARNTL2	12	12p12.2-p11.2	aryl hydrocarbon receptor nuclear translocator like 2	6983	1.68723	3.29e-07	1.6e-05
ENSG00000165646	6571	SLC18A2	10	10q25	solute carrier family 18 (vesicular monoamine transporter), member 2	4125	1.68651	7.3e-05	0.000823435
ENSG00000116132	5396	PRRX1	1	1q24	paired related homeobox 1	8246	1.68368	3.5e-05	0.000470349
ENSG00000162433	205	AK4	1	1p31.3	adenylate kinase 4	7578	1.68359	1.81e-05	0.000295609
ENSG00000151917	221336	BEND6	6	6p12.1	BEN domain containing 6	5588	1.68217	2.38e-05	0.000355379
ENSG00000104237	6101	RP1	8	8q12.1	retinitis pigmentosa 1 (autosomal dominant)	7100	1.68079	0.000169028	0.00155282
ENSG00000163739	2919	CXCL1	4	4q21	chemokine (C-X-C motif) ligand 1 (melanoma growth stimulating activity, alpha)	1296	1.68031	0.000651345	0.00453041
ENSG00000149534	2206	MS4A2	11	11q12-q13	membrane-spanning 4-domains, subfamily A, member 2	4453	1.6785	0.000692912	0.0047628
ENSG00000163006	165055	CCDC138	2	2q12.3	coiled-coil domain containing 138	5796	1.6769	1.02e-05	0.000193246
ENSG00000166402	7275	TUB	11	11p15.5	tubby bipartite transcription factor	6722	1.67536	2.89e-05	0.000411549
ENSG00000119866	53335	BCL11A	2	2p16.1	B-cell CLL/lymphoma 11A (zinc finger protein)	8375	1.67019	1.22e-07	7.81e-06
ENSG00000197208	6583	SLC22A4	5	5q31.1	solute carrier family 22 (organic cation/zwitterion transporter), member 4	2688	1.66867	0.000120626	0.00120187
ENSG00000124429	79983	POF1B	X	Xq21.2	premature ovarian failure, 1B	4029	1.66781	9.41e-05	0.00100029
ENSG00000260286	101928603	C6orf229	6	-	chromosome 6 open reading frame 229	814	1.66475	9.05e-05	0.0009719
ENSG00000167757	11012	KLK11	19	19q13.33	kallikrein related peptidase 11	3113	1.66461	2.74e-05	0.000394968
ENSG00000167286	915	CD3D	11	11q23	CD3d molecule, delta (CD3-TCR complex)	929	1.66294	3.67e-05	0.000486422
ENSG00000135951	80705	TSGA10	2	2q11.2	testis specific 10	7375	1.65994	0.000150153	0.00142523
ENSG00000112183	221662	RBM24	6	6p22.3	RNA binding motif protein 24	3444	1.65989	0.00098293	0.00628953
ENSG00000186007	93273	LEMD1	1	1q32.1	LEM domain containing 1	2199	1.65638	0.000340766	0.00271783
ENSG00000133083	9201	DCLK1	13	13q13	doublecortin like kinase 1	14375	1.65547	0.00017764	0.00161536
ENSG00000164318	133584	EGFLAM	5	5p13.2-p13.1	EGF-like, fibronectin type III and laminin G domains	5724	1.6548	6.36e-05	0.000739152
ENSG00000186818	11006	LILRB4	19	19q13.4	leukocyte immunoglobulin-like receptor, subfamily B (with TM and ITIM domains), member 4	6328	1.65397	9.95e-06	0.000190099
ENSG00000109771	55805	LRP2BP	4	4q35.1	LRP2 binding protein	7360	1.65233	6.01e-05	0.000711978
ENSG00000128596	64753	CCDC136	7	7q33	coiled-coil domain containing 136	6188	1.65208	2.36e-06	6.44e-05
ENSG00000162692	7412	VCAM1	1	1p32-p31	vascular cell adhesion molecule 1	6049	1.65129	0.000337786	0.00269726
ENSG00000143217	81607	PVRL4	1	1q23.3	poliovirus receptor-related 4	3502	1.65067	3.96e-07	1.77e-05
ENSG00000186377	260293	CYP4X1	1	1p33|1	cytochrome P450 family 4 subfamily X member 1	2548	1.64879	1.23e-05	0.000222335
ENSG00000165807	145376	PPP1R36	14	14q23.3	protein phosphatase 1 regulatory subunit 36	3093	1.64835	0.000487794	0.00360372
ENSG00000277363	80725	SRCIN1	17	17q12	SRC kinase signaling inhibitor 1	11658	1.64827	8.99e-06	0.000176558
ENSG00000109472	1363	CPE	4	4q32.3	carboxypeptidase E	2958	1.64683	1.9e-06	5.44e-05
ENSG00000133067	59352	LGR6	1	1q32.1	leucine-rich repeat containing G protein-coupled receptor 6	4583	1.64663	0.000163777	0.00151598
ENSG00000115457	3485	IGFBP2	2	2q35	insulin like growth factor binding protein 2	4767	1.64624	5.14e-06	0.000116087
ENSG00000067445	7216	TRO	X	Xp11.22-p11.21	trophinin	6716	1.64547	2.95e-08	2.89e-06
ENSG00000137225	11131	CAPN11	6	6p12	calpain 11	3549	1.64454	5.6e-07	2.27e-05
ENSG00000100302	23551	RASD2	22	22q13.1	RASD family member 2	3412	1.64222	2.24e-05	0.000340438
ENSG00000163536	5274	SERPINI1	3	3q26.1	serpin peptidase inhibitor, clade I (neuroserpin), member 1	2418	1.64146	4.29e-06	0.000102039
ENSG00000156804	114907	FBXO32	8	8q24.13	F-box protein 32	7395	1.64022	1.55e-06	4.69e-05
ENSG00000146070	7941	PLA2G7	6	6p21.2-p12	phospholipase A2 group VII	2026	1.63933	0.000639883	0.00446688
ENSG00000106772	158471	PRUNE2	9	9q21.2	prune homolog 2 (Drosophila)	14656	1.63897	1.84e-05	0.000298161
ENSG00000185518	9899	SV2B	15	15q26.1	synaptic vesicle glycoprotein 2B	12454	1.63726	1.07e-05	0.000200072
ENSG00000103599	64799	IQCH	15	15q23	IQ motif containing H	7108	1.63717	4.01e-05	0.000525009
ENSG00000276600	338382	RAB7B	1	1q32	RAB7B, member RAS oncogene family	3686	1.63616	1.16e-05	0.000214778
ENSG00000179388	1960	EGR3	8	8p23-p21	early growth response 3	4855	1.63414	0.00384761	0.0190691
ENSG00000141404	2774	GNAL	18	18p11.22-p11.21	guanine nucleotide binding protein (G protein), alpha activating activity polypeptide, olfactory type	8445	1.63225	1.78e-06	5.18e-05
ENSG00000102271	56062	KLHL4	X	Xq21.3	kelch like family member 4	5818	1.63188	1.28e-05	0.000228369
ENSG00000177300	53842	CLDN22	4	4q35.1	claudin 22	2581	1.62994	0.0113084	0.0453113
ENSG00000185250	285755	PPIL6	6	6q21	peptidylprolyl isomerase like 6	4481	1.62595	0.000174812	0.00159612
ENSG00000147166	26548	ITGB1BP2	X	Xq12-q13.1	integrin subunit beta 1 binding protein 2	2201	1.62492	6.62e-07	2.58e-05
ENSG00000134986	9315	NREP	5	5q22.1	neuronal regeneration related protein	9337	1.61786	5.5e-06	0.000122395
ENSG00000144061	4867	NPHP1	2	2q13	nephronophthisis 1 (juvenile)	11763	1.6177	2.04e-06	5.76e-05
ENSG00000127074	6003	RGS13	1	1q31.2	regulator of G-protein signaling 13	5923	1.61713	0.00118741	0.00730894
ENSG00000139629	11226	GALNT6	12	12q13	polypeptide N-acetylgalactosaminyltransferase 6	7347	1.616	3.43e-07	1.64e-05
ENSG00000277075	3012	HIST1H2AE	6	6p22.2	histone cluster 1, H2ae	509	1.61115	0.000505923	0.00370448
ENSG00000070190	27071	DAPP1	4	4q25-q27	dual adaptor of phosphotyrosine and 3-phosphoinositides	4548	1.6099	4.21e-06	0.000100709
ENSG00000105427	84518	CNFN	19	19q13.2	cornifelin	603	1.60978	2.56e-06	6.8e-05
ENSG00000134716	1573	CYP2J2	1	1p31.3-p31.2	cytochrome P450 family 2 subfamily J member 2	2990	1.60908	1.13e-05	0.000209773
ENSG00000184293	160365	CLECL1	12	12p13.31	C-type lectin like 1	1721	1.6077	0.00167872	0.00966018
ENSG00000105131	79852	EPHX3	19	19p13.12	epoxide hydrolase 3	2034	1.6073	3.25e-07	1.59e-05
ENSG00000203778	619208	FAM229B	6	6q21	family with sequence similarity 229 member B	2543	1.60584	2.13e-05	0.000330315
ENSG00000103888	57214	CEMIP	15	15q24	cell migration inducing protein, hyaluronan binding	7621	1.60553	0.000268145	0.0022495
ENSG00000130812	83854	ANGPTL6	19	19p13.2	angiopoietin like 6	2181	1.60451	7.19e-06	0.000150913
ENSG00000072694	2213	FCGR2B	1	1q23	Fc fragment of IgG, low affinity IIb, receptor (CD32)	6651	1.60363	3.64e-07	1.67e-05
ENSG00000147614	245972	ATP6V0D2	8	-	ATPase, H+ transporting, lysosomal 38kDa, V0 subunit d2	3010	1.60351	0.00840383	0.0357869
ENSG00000149260	726	CAPN5	11	11q14	calpain 5	6166	1.60323	4.81e-07	2.06e-05
ENSG00000122824	170685	NUDT10	X	Xp11.23	nudix hydrolase 10	2054	1.6032	0.00160487	0.00933119
ENSG00000116191	55103	RALGPS2	1	1q25.2	Ral GEF with PH domain and SH3 binding motif 2	9178	1.60291	0.000388464	0.00301065
ENSG00000163362	55765	C1orf106	1	1q32.1	chromosome 1 open reading frame 106	5413	1.60029	7.82e-07	2.89e-05
ENSG00000123570	51209	RAB9B	X	Xq22.2	RAB9B, member RAS oncogene family	3748	1.59981	1.87e-06	5.37e-05
ENSG00000197046	284266	SIGLEC15	18	18q12.3	sialic acid binding Ig-like lectin 15	3598	1.59773	0.000262462	0.00221289
ENSG00000145850	91937	TIMD4	5	5q33.3	T-cell immunoglobulin and mucin domain containing 4	1555	1.59672	0.00566816	0.0261074
ENSG00000203685	375057	C1orf95	1	1q42.12	chromosome 1 open reading frame 95	7791	1.59657	3.13e-06	7.82e-05
ENSG00000171517	23566	LPAR3	1	1p22.3	lysophosphatidic acid receptor 3	3543	1.59487	0.000298606	0.00246048
ENSG00000101443	10406	WFDC2	20	20q13.12	WAP four-disulfide core domain 2	1382	1.59453	1.28e-05	0.000228369
ENSG00000036672	9099	USP2	11	11q23.3	ubiquitin specific peptidase 2	4538	1.59439	0.000327297	0.00263072
ENSG00000114200	590	BCHE	3	3q26.1-q26.2	butyrylcholinesterase	3082	1.59339	0.000136551	0.00132039
ENSG00000205213	55366	LGR4	11	11p14-p13	leucine-rich repeat containing G protein-coupled receptor 4	6340	1.59161	0.000483259	0.00357612
ENSG00000177694	254827	NAALADL2	3	3q26.31	N-acetylated alpha-linked acidic dipeptidase-like 2	13599	1.59074	3.58e-07	1.67e-05
ENSG00000167157	51450	PRRX2	9	9q34.1	paired related homeobox 2	1311	1.58837	1.18e-05	0.000217287
ENSG00000134363	10468	FST	5	5q11.2	follistatin	2969	1.58689	0.000237975	0.00204625
ENSG00000173208	225	ABCD2	12	12q12	ATP binding cassette subfamily D member 2	6238	1.58596	0.00379533	0.0188727
ENSG00000123096	8082	SSPN	12	12p11.2	sarcospan	6821	1.58545	3.21e-05	0.000445156
ENSG00000163751	1359	CPA3	3	3q24	carboxypeptidase A3	1848	1.58504	0.000352654	0.00278946
ENSG00000237289	1159	CKMT1B	15	15q15	creatine kinase, mitochondrial 1B	3470	1.58352	0.000254247	0.00215853
ENSG00000100290	638	BIK	22	22q13.31	BCL2-interacting killer	953	1.58312	1.21e-05	0.000219459
ENSG00000153404	153478	PLEKHG4B	5	5p15.33	pleckstrin homology and RhoGEF domain containing G4B	12203	1.58301	9.75e-06	0.00018681
ENSG00000154102	404550	C16orf74	16	16q24.1	chromosome 16 open reading frame 74	2181	1.58119	9.06e-08	6.3e-06
ENSG00000015413	1800	DPEP1	16	16q24.3	dipeptidase 1 (renal)	2737	1.57604	0.00297909	0.0154012
ENSG00000024526	55635	DEPDC1	1	1p31.2	DEP domain containing 1	5904	1.5741	2.11e-05	0.000328472
ENSG00000164627	221458	KIF6	6	6p21.2	kinesin family member 6	11868	1.5731	1.95e-05	0.000311921
ENSG00000108244	25984	KRT23	17	17q21.2	keratin 23, type I	2902	1.57179	0.00867636	0.0367146
ENSG00000169989	201798	TIGD4	4	4q31.3	tigger transposable element derived 4	2472	1.57126	0.000817041	0.00545411
ENSG00000145861	114898	C1QTNF2	5	5q33.3	C1q and tumor necrosis factor related protein 2	2414	1.57123	7e-06	0.000147774
ENSG00000182240	25825	BACE2	21	21q22.3	beta-site APP-cleaving enzyme 2	9619	1.57094	2.61e-07	1.35e-05
ENSG00000122367	11155	LDB3	10	10q22.3-q23.2	LIM domain binding 3	6676	1.57071	0.000118767	0.00119119
ENSG00000118729	845	CASQ2	1	1p13.1	calsequestrin 2	2769	1.56953	6.42e-05	0.000744221
ENSG00000104921	2208	FCER2	19	19p13.3	Fc fragment of IgE, low affinity II, receptor for (CD23)	2451	1.56709	0.000828385	0.00551353
ENSG00000167771	283248	RCOR2	11	11q13.1	REST corepressor 2	2738	1.56674	1.01e-05	0.000191813
ENSG00000175643	116028	RMI2	16	16p13.13	RecQ mediated genome instability 2	2701	1.56587	4.36e-06	0.000102878
ENSG00000167077	150365	MEI1	22	22q13.2	meiotic double-stranded break formation protein 1	5393	1.56582	0.000141325	0.00136165
ENSG00000072858	54847	SIDT1	3	3q13.2	SID1 transmembrane family member 1	8060	1.56514	1.37e-06	4.26e-05
ENSG00000123977	164781	DAW1	2	2q36.3	dynein assembly factor with WDR repeat domains 1	2933	1.56414	0.00228626	0.0124269
ENSG00000183856	128239	IQGAP3	1	1q21.3	IQ motif containing GTPase activating protein 3	6742	1.56397	1.29e-05	0.00023064
ENSG00000149927	8448	DOC2A	16	16p11.2	double C2-like domains, alpha	6426	1.56187	0.000779906	0.00525586
ENSG00000131747	7153	TOP2A	17	17q21.2	topoisomerase (DNA) II alpha	6437	1.56143	5.32e-05	0.000654812
ENSG00000129173	79733	E2F8	11	11p15.1	E2F transcription factor 8	4140	1.56136	1.67e-05	0.000279379
ENSG00000114948	8745	ADAM23	2	2q33	ADAM metallopeptidase domain 23	6421	1.55871	0.00122169	0.00747398
ENSG00000106823	1842	ECM2	9	9q22.3	extracellular matrix protein 2, female organ and adipocyte specific	4916	1.55494	0.000154199	0.00145304
ENSG00000250510	27239	GPR162	12	12p13	G protein-coupled receptor 162	3295	1.55474	8.32e-06	0.000167332
ENSG00000126950	59353	TMEM35	X	Xq22.1	transmembrane protein 35	2571	1.55385	1.19e-05	0.00021847
ENSG00000130595	7140	TNNT3	11	11p15.5	troponin T type 3 (skeletal, fast)	2567	1.55165	0.000206518	0.00182844
ENSG00000105855	3696	ITGB8	7	7p21.1	integrin subunit beta 8	15156	1.55115	0.00154839	0.0090656
ENSG00000188766	399473	SPRED3	19	19q13	sprouty-related, EVH1 domain containing 3	5864	1.5506	7.53e-06	0.000155722
ENSG00000090889	24137	KIF4A	X	Xq13.1	kinesin family member 4A	4533	1.55044	7.5e-06	0.000155509
ENSG00000132704	79368	FCRL2	1	1q21	Fc receptor-like 2	5058	1.5502	0.0118982	0.0471124
ENSG00000175175	22843	PPM1E	17	17q22	protein phosphatase, Mg2+/Mn2+ dependent 1E	6542	1.54967	7.44e-05	0.000836103
ENSG00000118292	79630	C1orf54	1	1q21.2	chromosome 1 open reading frame 54	1351	1.54888	3.37e-08	3.12e-06
ENSG00000136011	55576	STAB2	12	12q23.3	stabilin 2	9288	1.54575	0.00122633	0.00748674
ENSG00000156265	56911	MAP3K7CL	21	21q22.3	MAP3K7 C-terminal like	4497	1.54555	9.79e-07	3.33e-05
ENSG00000106976	1759	DNM1	9	9q34	dynamin 1	8851	1.54364	0.000121462	0.00120621
ENSG00000184661	157313	CDCA2	8	8p21.2	cell division cycle associated 2	3908	1.54271	9.57e-06	0.000184183
ENSG00000142621	114827	FHAD1	1	1p36.21	forkhead-associated (FHA) phosphopeptide binding domain 1	12805	1.54149	0.000933441	0.00605655
ENSG00000054392	55733	HHAT	1	1q32	hedgehog acyltransferase	6641	1.53889	9.08e-07	3.19e-05
ENSG00000155749	130540	ALS2CR12	2	2q33.1	amyotrophic lateral sclerosis 2 chromosome region candidate 12	2635	1.53885	0.000879628	0.00577715
ENSG00000121152	23397	NCAPH	2	2q11.2	non-SMC condensin I complex subunit H	3278	1.53847	2.05e-07	1.15e-05
ENSG00000177675	283316	CD163L1	12	12p13.3	CD163 molecule like 1	5690	1.53667	2.62e-05	0.00038096
ENSG00000109654	23321	TRIM2	4	4q31.3	tripartite motif containing 2	9425	1.53392	6.51e-05	0.000753288
ENSG00000080298	5991	RFX3	9	9p24.2	regulatory factor X3	11169	1.53227	0.000315294	0.00255627
ENSG00000177679	222183	SRRM3	7	7q11.23	serine/arginine repetitive matrix 3	6873	1.53148	1.2e-06	3.9e-05
ENSG00000103494	23322	RPGRIP1L	16	16q12.2	RPGRIP1-like	12857	1.53079	2.55e-05	0.00037206
ENSG00000132321	79781	IQCA1	2	2q37.3	IQ motif containing with AAA domain 1	5975	1.52978	9.17e-07	3.2e-05
ENSG00000121236	117854	TRIM6	11	11p15.4	tripartite motif containing 6	3947	1.52951	1.23e-06	3.97e-05
ENSG00000134504	284252	KCTD1	18	18q11.2	potassium channel tetramerization domain containing 1	7410	1.52934	8.63e-07	3.07e-05
ENSG00000182013	55228	PNMAL1	19	19q13.32	paraneoplastic Ma antigen family-like 1	3696	1.52934	0.000152709	0.00144541
ENSG00000138115	1558	CYP2C8	10	10q23.33	cytochrome P450 family 2 subfamily C member 8	2571	1.52886	9.61e-05	0.00101737
ENSG00000169783	84894	LINGO1	15	15q24.3	leucine rich repeat and Ig domain containing 1	4902	1.52834	8.41e-05	0.000920604
ENSG00000163520	2199	FBLN2	3	3p25.1	fibulin 2	4812	1.52797	3.43e-05	0.00046542
ENSG00000203867	282996	RBM20	10	10q25.2	RNA binding motif protein 20	8162	1.52745	0.00110989	0.00693021
ENSG00000099284	55506	H2AFY2	10	10q22.1	H2A histone family member Y2	1980	1.5273	6.7e-08	5.2e-06
ENSG00000163599	1493	CTLA4	2	2q33	cytotoxic T-lymphocyte-associated protein 4	2120	1.52636	0.000209297	0.00184696
ENSG00000078098	2191	FAP	2	2q23	fibroblast activation protein alpha	7003	1.52464	0.00149527	0.00881606
ENSG00000109805	64151	NCAPG	4	4p15.33	non-SMC condensin I complex subunit G	4921	1.52427	5.61e-05	0.000679798
ENSG00000104332	6422	SFRP1	8	8p11.21	secreted frizzled-related protein 1	4761	1.52403	0.00584717	0.0266848
ENSG00000186231	114792	KLHL32	6	6q16.1	kelch like family member 32	4124	1.52395	0.00032076	0.00259369
ENSG00000101605	8736	MYOM1	18	18p11.31	myomesin 1	6574	1.52343	8.89e-06	0.000175408
ENSG00000169884	7480	WNT10B	12	12q13	wingless-type MMTV integration site family member 10B	2629	1.52209	0.000209771	0.00184992
ENSG00000153294	221393	ADGRF4	6	6p12.3	adhesion G protein-coupled receptor F4	3391	1.52146	0.00490194	0.0232808
ENSG00000188010	729967	MORN2	2	2p22.1	MORN repeat containing 2	1364	1.52054	8.46e-05	0.000923321
ENSG00000132821	128434	VSTM2L	20	20q11.23	V-set and transmembrane domain containing 2 like	1959	1.51935	7.13e-05	0.000806412
ENSG00000137501	54843	SYTL2	11	11q14	synaptotagmin like 2	11258	1.51791	5.29e-05	0.00065197
ENSG00000198353	3221	HOXC4	12	12q13.3	homeobox C4	2725	1.51679	1.84e-05	0.000298161
ENSG00000049089	1298	COL9A2	1	1p33-p32	collagen, type IX, alpha 2	4151	1.51399	4.24e-05	0.00054809
ENSG00000131050	140683	BPIFA2	20	20q11.21	BPI fold containing family A member 2	1178	1.51374	0.00157138	0.00916424
ENSG00000198088	54830	NUP62CL	X	Xq22.3	nucleoporin 62kDa C-terminal like	1867	1.51336	7.98e-05	0.000885412
ENSG00000174500	257144	GCSAM	3	3q13.2	germinal center-associated, signaling and motility	3783	1.51228	0.000102005	0.00106511
ENSG00000130413	65975	STK33	11	11p15.3	serine/threonine kinase 33	7599	1.51157	2.09e-05	0.000326661
ENSG00000150667	161835	FSIP1	15	15q14	fibrous sheath interacting protein 1	2951	1.51104	2.81e-05	0.000403412
ENSG00000170703	284076	TTLL6	17	17q21.32	tubulin tyrosine ligase like 6	5097	1.51008	0.000583927	0.00415839
ENSG00000061656	6676	SPAG4	20	20q11.21	sperm associated antigen 4	2240	1.50287	0.00139265	0.00829844
ENSG00000140025	90141	EFCAB11	14	14q32.11	EF-hand calcium binding domain 11	8302	1.50152	3e-07	1.49e-05
ENSG00000163347	9076	CLDN1	3	3q28-q29	claudin 1	3663	1.50137	5.84e-05	0.000698558
ENSG00000100918	9985	REC8	14	14q11.2-q12	REC8 meiotic recombination protein	3844	1.49605	5.2e-06	0.000116982
ENSG00000154645	140578	CHODL	21	21q11.2	chondrolectin	3093	1.49525	6.1e-05	0.000720382
ENSG00000131969	145447	ABHD12B	14	14q22.1	abhydrolase domain containing 12B	4444	1.49516	0.0104113	0.0423996
ENSG00000204065	340543	TCEAL5	X	Xq22.1	transcription elongation factor A (SII)-like 5	1168	1.49389	5.08e-06	0.000114844
ENSG00000115163	1058	CENPA	2	2p23.3	centromere protein A	1983	1.4936	1.96e-05	0.000311921
ENSG00000186265	151888	BTLA	3	3q13.2	B and T lymphocyte associated	3697	1.4921	0.00186772	0.0105136
ENSG00000144369	165215	FAM171B	2	2q32.1	family with sequence similarity 171 member B	5826	1.49116	0.000372987	0.00291255
ENSG00000075340	119	ADD2	2	2p13.3	adducin 2	12673	1.49093	9.13e-06	0.000178173
ENSG00000010310	2696	GIPR	19	19q13.3	gastric inhibitory polypeptide receptor	4736	1.48808	1.03e-05	0.000194935
ENSG00000173467	155465	AGR3	7	7p21.1	anterior gradient 3, protein disulphide isomerase family member	1160	1.48627	1.34e-05	0.000237361
ENSG00000204323	643008	SMIM5	17	17q25.1	small integral membrane protein 5	5117	1.48544	0.000114052	0.00115523
ENSG00000105173	898	CCNE1	19	19q12	cyclin E1	2550	1.48513	1.39e-06	4.3e-05
ENSG00000164266	6690	SPINK1	5	5q32	serine peptidase inhibitor, Kazal type 1	1480	1.4798	0.000777511	0.00524234
ENSG00000138795	51176	LEF1	4	4q23-q25	lymphoid enhancer-binding factor 1	5361	1.47887	2.52e-05	0.000370518
ENSG00000163083	3625	INHBB	2	2cen-q13	inhibin beta B	3204	1.47647	0.00064581	0.00450045
ENSG00000198039	10793	ZNF273	7	7q11.21	zinc finger protein 273	8652	1.47637	0.0008588	0.00566808
ENSG00000100448	1511	CTSG	14	14q11.2	cathepsin G	1374	1.47403	0.00241932	0.0130002
ENSG00000162148	220004	PPP1R32	11	11q12.2	protein phosphatase 1 regulatory subunit 32	2400	1.47131	0.000669261	0.00463335
ENSG00000106809	4969	OGN	9	9q22	osteoglycin	3321	1.47086	0.00365976	0.0183138
ENSG00000166448	222865	TMEM130	7	7q22.1	transmembrane protein 130	4663	1.47073	0.00922132	0.0384871
ENSG00000006016	9244	CRLF1	19	19p12	cytokine receptor-like factor 1	3018	1.47023	0.000263128	0.00221613
ENSG00000214050	157574	FBXO16	8	8p21.1	F-box protein 16	3972	1.4696	5.22e-07	2.18e-05
ENSG00000000971	3075	CFH	1	1q32	complement factor H	8145	1.46951	2.6e-06	6.84e-05
ENSG00000178184	84552	PARD6G	18	18q23	par-6 family cell polarity regulator gamma	4224	1.46872	8.57e-07	3.06e-05
ENSG00000089692	3902	LAG3	12	12p13.32	lymphocyte-activation gene 3	3056	1.4678	3.65e-07	1.67e-05
ENSG00000198780	26049	FAM169A	5	5q13.3	family with sequence similarity 169 member A	6860	1.46767	0.00238934	0.0128829
ENSG00000115107	55240	STEAP3	2	2q14.2	STEAP3 metalloreductase	4562	1.46552	4.96e-07	2.11e-05
ENSG00000171812	1296	COL8A2	1	1p34.2	collagen, type VIII, alpha 2	4670	1.46457	2.43e-06	6.57e-05
ENSG00000005469	54677	CROT	7	7q21.1	carnitine O-octanoyltransferase	4979	1.46135	1.21e-05	0.000219929
ENSG00000122188	54900	LAX1	1	1q32.1	lymphocyte transmembrane adaptor 1	3198	1.4608	0.000836807	0.00555927
ENSG00000196562	55959	SULF2	20	20q13.12	sulfatase 2	6657	1.45825	1.85e-06	5.34e-05
ENSG00000197992	283420	CLEC9A	12	12p13.2	C-type lectin domain family 9 member A	2854	1.45748	0.000355972	0.00280669
ENSG00000112742	7272	TTK	6	6q14.1	TTK protein kinase	4579	1.45642	3.49e-05	0.000469942
ENSG00000148948	57689	LRRC4C	11	11p12	leucine rich repeat containing 4C	5356	1.45313	0.00101073	0.0064367
ENSG00000134253	80263	TRIM45	1	1p13.1	tripartite motif containing 45	4368	1.45299	2.91e-06	7.42e-05
ENSG00000129038	4016	LOXL1	15	15q22	lysyl oxidase like 1	3637	1.45272	7.22e-07	2.75e-05
ENSG00000196476	140680	C20orf96	20	20p13	chromosome 20 open reading frame 96	1730	1.44956	3.05e-05	0.000427508
ENSG00000083454	5026	P2RX5	17	17p13.3	purinergic receptor P2X, ligand gated ion channel, 5	4190	1.44868	0.00242421	0.0130134
ENSG00000000003	7105	TSPAN6	X	Xq22	tetraspanin 6	4535	1.44822	1.02e-05	0.000193082
ENSG00000187860	550631	CCDC157	22	22q12.2	coiled-coil domain containing 157	6586	1.44782	3.19e-05	0.000443279
ENSG00000144857	91653	BOC	3	3q13.2	BOC cell adhesion associated, oncogene regulated	10330	1.44766	0.000243191	0.00207912
ENSG00000129437	43847	KLK14	19	19q13.3-q13.4	kallikrein related peptidase 14	1159	1.44521	0.000770729	0.00521231
ENSG00000050438	9498	SLC4A8	12	12q13.13	solute carrier family 4, sodium bicarbonate cotransporter, member 8	17980	1.4447	0.000687274	0.00473165
ENSG00000155367	333926	PPM1J	1	1p13.2	protein phosphatase, Mg2+/Mn2+ dependent 1J	2874	1.44374	1.47e-06	4.48e-05
ENSG00000138180	55165	CEP55	10	10q23.33	centrosomal protein 55kDa	3271	1.44306	5.57e-05	0.000677064
ENSG00000158715	85414	SLC45A3	1	1q32.1	solute carrier family 45 member 3	3702	1.44134	2.45e-05	0.0003635
ENSG00000146242	7162	TPBG	6	6q14-q15	trophoblast glycoprotein	6904	1.43762	2.77e-06	7.14e-05
ENSG00000204544	394263	MUC21	6	6p21.32	mucin 21, cell surface associated	3793	1.43721	0.00527258	0.0246918
ENSG00000101096	4773	NFATC2	20	20q13.2	nuclear factor of activated T-cells, cytoplasmic, calcineurin-dependent 2	8286	1.43454	0.00226522	0.0123275
ENSG00000139910	4857	NOVA1	14	14q	neuro-oncological ventral antigen 1	10046	1.434	3.22e-05	0.000445156
ENSG00000129451	5655	KLK10	19	19q13	kallikrein related peptidase 10	3853	1.43221	4.25e-05	0.000548716
ENSG00000141519	55036	CCDC40	17	17q25.3	coiled-coil domain containing 40	9961	1.43205	0.000146375	0.00139628
ENSG00000144152	129804	FBLN7	2	2q13	fibulin 7	6578	1.43183	2.13e-05	0.000330315
ENSG00000013573	1663	DDX11	12	12p11	DEAD/H (Asp-Glu-Ala-Asp/His) box helicase 11	8374	1.43174	0.0014005	0.00833781
ENSG00000106541	10551	AGR2	7	7p21.3	anterior gradient 2, protein disulphide isomerase family member	2845	1.43132	0.000999403	0.00637368
ENSG00000139220	8499	PPFIA2	12	12q21.31	protein tyrosine phosphatase, receptor type, f polypeptide (PTPRF), interacting protein (liprin), alpha 2	8573	1.43124	0.00211642	0.0116499
ENSG00000156113	3778	KCNMA1	10	10q22.3	potassium channel, calcium activated large conductance subfamily M alpha, member 1	19248	1.42913	2e-05	0.000316243
ENSG00000150556	130576	LYPD6B	2	2q23.2	LY6/PLAUR domain containing 6B	3771	1.4291	0.000501658	0.00368587
ENSG00000173198	10800	CYSLTR1	X	Xq13.2-q21.1	cysteinyl leukotriene receptor 1	5571	1.42884	1.63e-05	0.000273543
ENSG00000180881	84698	CAPS2	12	12q14.1	calcyphosine 2	6689	1.42828	0.00108381	0.00679265
ENSG00000099256	56952	PRTFDC1	10	10p12.1	phosphoribosyl transferase domain containing 1	2329	1.42823	8.63e-07	3.07e-05
ENSG00000171385	3752	KCND3	1	1p13.3	potassium channel, voltage gated Shal related subfamily D, member 3	7863	1.42732	4.62e-05	0.000585521
ENSG00000021645	9369	NRXN3	14	14q31	neurexin 3	15535	1.42637	0.000165471	0.0015285
ENSG00000189233	389643	NUGGC	8	8p21.1	nuclear GTPase, germinal center associated	3959	1.42571	0.000352403	0.00278911
ENSG00000186409	728621	CCDC30	1	1p34.2	coiled-coil domain containing 30	13504	1.42482	6.49e-05	0.000751549
ENSG00000204252	3111	HLA-DOA	6	6p21.3	major histocompatibility complex, class II, DO alpha	4012	1.42451	2.9e-05	0.000411945
ENSG00000168026	199223	TTC21A	3	3p22.2	tetratricopeptide repeat domain 21A	7677	1.42362	0.000123485	0.00122225
ENSG00000172915	26960	NBEA	13	13q13	neurobeachin	11949	1.423	0.000550707	0.00396173
ENSG00000132514	10462	CLEC10A	17	17p13.1	C-type lectin domain family 10 member A	2469	1.4212	3.35e-06	8.25e-05
ENSG00000144451	79582	SPAG16	2	2q34	sperm associated antigen 16	8257	1.42038	1.19e-05	0.000218521
ENSG00000100360	11020	IFT27	22	22q13.1	intraflagellar transport 27	8009	1.4196	6.81e-06	0.000145167
ENSG00000122870	80114	BICC1	10	10q21.1	BicC family RNA binding protein 1	6569	1.41639	0.000110851	0.00113074
ENSG00000173988	220416	LRRC63	13	13q14.13	leucine rich repeat containing 63	2677	1.41542	0.00192611	0.0107737
ENSG00000156011	23362	PSD3	8	8p21.3	pleckstrin and Sec7 domain containing 3	15213	1.41396	0.000962379	0.00619908
ENSG00000079156	114880	OSBPL6	2	2q32.1	oxysterol binding protein like 6	11486	1.41334	8.45e-05	0.000923321
ENSG00000118690	84071	ARMC2	6	6q21	armadillo repeat containing 2	4250	1.41184	3.21e-05	0.000445156
ENSG00000078589	27334	P2RY10	X	Xq21.1	purinergic receptor P2Y, G-protein coupled, 10	1803	1.41018	0.00276744	0.0145478
ENSG00000171502	255631	COL24A1	1	1p22.3	collagen, type XXIV, alpha 1	9568	1.40936	0.00761235	0.03312
ENSG00000173898	6712	SPTBN2	11	11q13	spectrin, beta, non-erythrocytic 2	9137	1.40928	2.32e-05	0.000349431
ENSG00000114631	50512	PODXL2	3	3q21.3	podocalyxin-like 2	2186	1.40762	3.56e-06	8.65e-05
ENSG00000100162	79019	CENPM	22	22q13.2	centromere protein M	1778	1.40733	1.57e-05	0.000267519
ENSG00000197980	389170	LEKR1	3	3q25.31	leucine, glutamate and lysine rich 1	5581	1.40589	0.000210058	0.00185124
ENSG00000137960	54810	GIPC2	1	1p31.1	GIPC PDZ domain containing family member 2	3973	1.40546	0.000156554	0.0014663
ENSG00000152953	55351	STK32B	4	4p16.2	serine/threonine kinase 32B	5324	1.40448	2.48e-06	6.65e-05
ENSG00000117425	8643	PTCH2	1	1p34.1	patched 2	5149	1.40435	3.38e-05	0.000462438
ENSG00000148541	220965	FAM13C	10	10q21.1	family with sequence similarity 13 member C	6753	1.40149	0.00281961	0.0147069
ENSG00000030419	22807	IKZF2	2	2q34	IKAROS family zinc finger 2	12240	1.40119	0.000314513	0.00255395
ENSG00000163472	84283	TMEM79	1	1q22	transmembrane protein 79	3067	1.40067	4.24e-07	1.87e-05
ENSG00000142945	11004	KIF2C	1	1p34.1	kinesin family member 2C	3646	1.39947	8.3e-06	0.000167332
ENSG00000163617	57577	CCDC191	3	3q13.31	coiled-coil domain containing 191	5303	1.3979	0.00033695	0.0026938
ENSG00000165868	259217	HSPA12A	10	10q26.12	heat shock protein family A (Hsp70) member 12A	6754	1.39734	6.81e-05	0.000778281
ENSG00000267795	440335	SMIM22	16	16p13.3	small integral membrane protein 22	1762	1.39491	0.000137919	0.00133265
ENSG00000125931	4435	CITED1	X	Xq13.1	Cbp/p300-interacting transactivator, with Glu/Asp rich carboxy-terminal domain, 1	1760	1.39486	0.0102486	0.041877
ENSG00000167476	126306	JSRP1	19	19p13.3	junctional sarcoplasmic reticulum protein 1	1950	1.39335	0.00900149	0.0377456
ENSG00000143851	5778	PTPN7	1	1q32.1	protein tyrosine phosphatase, non-receptor type 7	5906	1.39309	6.63e-06	0.000141992
ENSG00000110318	57562	CEP126	11	11q22.1	centrosomal protein 126kDa	8191	1.38927	0.00245191	0.0131344
ENSG00000185361	126282	TNFAIP8L1	19	19p13.3	TNF alpha induced protein 8 like 1	6667	1.38889	4.36e-05	0.000561125
ENSG00000150051	283078	MKX	10	10p12.1	mohawk homeobox	4106	1.38786	0.00111755	0.00696511
ENSG00000120885	1191	CLU	8	8p21-p12	clusterin	6616	1.38735	0.000222326	0.00193649
ENSG00000013725	923	CD6	11	11q13	CD6 molecule	5958	1.38705	0.000313898	0.00255203
ENSG00000163879	7802	DNALI1	1	1p35.1	dynein, axonemal, light intermediate chain 1	4456	1.38656	1.64e-05	0.000276488
ENSG00000069188	54549	SDK2	17	17q25.1	sidekick cell adhesion molecule 2	11607	1.38632	0.0012701	0.00769102
ENSG00000102243	51442	VGLL1	X	Xq26.3	vestigial like family member 1	1541	1.38559	0.000176686	0.00160995
ENSG00000140297	9245	GCNT3	15	15q21.3	glucosaminyl (N-acetyl) transferase 3, mucin type	6475	1.3854	0.0126132	0.0493181
ENSG00000124766	6659	SOX4	6	6p22.3	SRY-box 4	5851	1.38496	7.41e-07	2.77e-05
ENSG00000178773	27132	CPNE7	16	16q24.3	copine VII	3048	1.38249	0.00190732	0.0106911
ENSG00000089685	332	BIRC5	17	17q25	baculoviral IAP repeat containing 5	3815	1.37999	2.47e-05	0.000365279
ENSG00000117724	1063	CENPF	1	1q41	centromere protein F	11690	1.37776	6.29e-05	0.000733795
ENSG00000188389	5133	PDCD1	2	2q37.3	programmed cell death 1	2114	1.37757	0.000102062	0.00106511
ENSG00000137434	347744	C6orf52	6	6p24.1	chromosome 6 open reading frame 52	884	1.37573	0.00151316	0.00888642
ENSG00000108830	8153	RND2	17	17q21	Rho family GTPase 2	4353	1.37398	9.85e-05	0.00103424
ENSG00000198729	81706	PPP1R14C	6	6q24.3-q25.3	protein phosphatase 1 regulatory inhibitor subunit 14C	2152	1.37115	7.37e-06	0.000153805
ENSG00000080986	10403	NDC80	18	18p11.32	NDC80 kinetochore complex component	3600	1.36995	4.25e-05	0.000548716
ENSG00000188322	388228	SBK1	16	16p11.2	SH3 domain binding kinase 1	4992	1.36956	1.19e-05	0.000217525
ENSG00000137463	84709	MGARP	4	4q31.1	mitochondria localized glutamic acid rich protein	1339	1.36817	3.39e-05	0.000462438
ENSG00000160951	5731	PTGER1	19	19p13.1	prostaglandin E receptor 1	1421	1.36684	0.00153657	0.00900029
ENSG00000153832	130888	FBXO36	2	2q36.3	F-box protein 36	3945	1.36599	2.57e-05	0.00037529
ENSG00000158089	79623	GALNT14	2	2p23.1	polypeptide N-acetylgalactosaminyltransferase 14	4567	1.36538	0.000176564	0.00160993
ENSG00000164953	91147	TMEM67	8	8q22.1	transmembrane protein 67	8281	1.36377	0.000205337	0.00182327
ENSG00000117560	356	FASLG	1	1q23	Fas ligand	1888	1.36258	0.00347415	0.0175155
ENSG00000276409	6358	CCL14	17	17q12	chemokine (C-C motif) ligand 14	3269	1.36182	0.00464686	0.0223378
ENSG00000080823	5891	MOK	14	14q32	MOK protein kinase	11009	1.36176	1.15e-05	0.000212279
ENSG00000133805	272	AMPD3	11	11p15	adenosine monophosphate deaminase 3	6793	1.36077	7.47e-06	0.000155238
ENSG00000091972	4345	CD200	3	3q13.2	CD200 molecule	2991	1.35967	0.000157772	0.00147462
ENSG00000188277	643338	C15orf62	15	15q15.1	chromosome 15 open reading frame 62	2370	1.35761	3.53e-05	0.000473177
ENSG00000135338	167691	LCA5	6	6q14.1	Leber congenital amaurosis 5	5964	1.35594	0.00039633	0.00305575
ENSG00000173175	111	ADCY5	3	3q21.1	adenylate cyclase 5	8873	1.35314	0.000143855	0.00137934
ENSG00000143494	79805	VASH2	1	1q32.3	vasohibin 2	9086	1.35255	0.000324394	0.00261364
ENSG00000102445	80183	KIAA0226L	13	13q14.13	KIAA0226-like	6105	1.35156	7.69e-05	0.000860524
ENSG00000186340	7058	THBS2	6	6q27	thrombospondin 2	6397	1.35057	0.00143419	0.0085082
ENSG00000106565	28959	TMEM176B	7	7q36.1	transmembrane protein 176B	1979	1.35035	2.74e-06	7.09e-05
ENSG00000275395	8857	FCGBP	19	19q13.1	Fc fragment of IgG binding protein	12961	1.34856	0.00106574	0.00671386
ENSG00000235098	441869	ANKRD65	1	1p36.33	ankyrin repeat domain 65	2644	1.3484	3.61e-07	1.67e-05
ENSG00000112562	64094	SMOC2	6	6q27	SPARC related modular calcium binding 2	4032	1.34832	0.00012852	0.00126365
ENSG00000184985	57537	SORCS2	4	4p16.1	sortilin-related VPS10 domain containing receptor 2	6317	1.34752	0.00102052	0.00647454
ENSG00000166592	6236	RRAD	16	16q22	Ras-related associated with diabetes	1709	1.3455	4.44e-05	0.000568847
ENSG00000143126	1952	CELSR2	1	1p21	cadherin, EGF LAG seven-pass G-type receptor 2	12349	1.34319	0.000235009	0.00202594
ENSG00000123485	55355	HJURP	2	2q37.1	Holliday junction recognition protein	3821	1.3421	0.000153334	0.00144725
ENSG00000170153	57484	RNF150	4	4q31.21	ring finger protein 150	11007	1.3412	0.00115742	0.00717368
ENSG00000105737	2901	GRIK5	19	19q13.2	glutamate receptor, ionotropic, kainate 5	5014	1.33974	0.000353405	0.00279211
ENSG00000068615	65055	REEP1	2	2p11.2	receptor accessory protein 1	5193	1.33854	3.18e-05	0.000443266
ENSG00000187068	285382	C3orf70	3	3q27.2	chromosome 3 open reading frame 70	5901	1.33746	0.000229054	0.00198223
ENSG00000276043	29128	UHRF1	19	19p13.3	ubiquitin-like with PHD and ring finger domains 1	5145	1.33717	0.000152582	0.00144523
ENSG00000110448	921	CD5	11	11q13	CD5 molecule	3221	1.33668	0.00334076	0.0169704
ENSG00000240207	100287290	LOC100287290	3	3q25.32	cytokine receptor CRL2	4177	1.33547	2.91e-06	7.42e-05
ENSG00000011426	54443	ANLN	7	7p15-p14	anillin actin binding protein	6012	1.33292	0.00031537	0.00255627
ENSG00000148219	23245	ASTN2	9	9q33.1	astrotactin 2	8290	1.33269	3.46e-05	0.000467519
ENSG00000129194	6665	SOX15	17	17p13.1	SRY-box 15	1541	1.3321	0.00139031	0.00828818
ENSG00000117394	6513	SLC2A1	1	1p34.2	solute carrier family 2 (facilitated glucose transporter), member 1	4927	1.32951	4.99e-05	0.000624202
ENSG00000162373	79656	BEND5	1	1p33	BEN domain containing 5	2138	1.32924	8.7e-06	0.00017264
ENSG00000122970	28981	IFT81	12	12q24.13	intraflagellar transport 81	7005	1.32911	0.00012979	0.00127149
ENSG00000172348	10231	RCAN2	6	6p12.3	regulator of calcineurin 2	3712	1.32866	2.73e-05	0.00039381
ENSG00000158806	10361	NPM2	8	8p21.3	nucleophosmin/nucleoplasmin 2	2063	1.32854	1.6e-05	0.000271675
ENSG00000121690	91614	DEPDC7	11	11p13	DEP domain containing 7	3326	1.32849	0.000104554	0.0010827
ENSG00000108700	6355	CCL8	17	17q11.2	chemokine (C-C motif) ligand 8	1261	1.32811	0.00318885	0.0162973
ENSG00000163568	9447	AIM2	1	1q22	absent in melanoma 2	2009	1.32777	0.00706574	0.0312788
ENSG00000117399	991	CDC20	1	1p34.1	cell division cycle 20	2038	1.3274	9.74e-05	0.00102809
ENSG00000100526	1033	CDKN3	14	14q22	cyclin-dependent kinase inhibitor 3	1836	1.32707	2.07e-05	0.00032344
ENSG00000145107	116211	TM4SF19	3	3q29	transmembrane 4 L six family member 19	1899	1.3269	0.00222538	0.0121451
ENSG00000161328	115399	LRRC56	11	11p15.5	leucine rich repeat containing 56	2769	1.32603	5.69e-05	0.000685117
ENSG00000158458	9542	NRG2	5	5q31.2	neuregulin 2	4520	1.32577	4.12e-05	0.000535876
ENSG00000221866	91584	PLXNA4	7	7q32.3	plexin A4	16372	1.32423	0.00120235	0.0073806
ENSG00000137821	54839	LRRC49	15	15q23	leucine rich repeat containing 49	9991	1.3242	8.35e-05	0.000916169
ENSG00000106236	4885	NPTX2	7	7q21.3-q22.1	neuronal pentraxin II	3016	1.32391	0.00291055	0.015128
ENSG00000088992	54997	TESC	12	12q24.22	tescalcin	1926	1.32286	1.16e-05	0.000214376
ENSG00000198400	4914	NTRK1	1	1q21-q22	neurotrophic tyrosine kinase, receptor, type 1	4356	1.32276	0.00104588	0.00660732
ENSG00000135094	10993	SDS	12	12q24.13	serine dehydratase	3006	1.32255	0.00251366	0.0134025
ENSG00000100321	9145	SYNGR1	22	22q13.1	synaptogyrin 1	6953	1.32046	2.86e-06	7.3e-05
ENSG00000197457	50861	STMN3	20	20q13.3	stathmin 3	3032	1.32032	2.22e-05	0.000338964
ENSG00000104213	5157	PDGFRL	8	8p22-p21.3	platelet-derived growth factor receptor-like	2409	1.31766	0.00296366	0.0153391
ENSG00000156049	9630	GNA14	9	9q21	guanine nucleotide binding protein (G protein), alpha 14	2721	1.31676	1.26e-05	0.000226325
ENSG00000146072	27242	TNFRSF21	6	6p21.1	tumor necrosis factor receptor superfamily member 21	3595	1.31638	1.61e-05	0.000272002
ENSG00000133392	4629	MYH11	16	16p13.11	myosin, heavy chain 11, smooth muscle	16141	1.31613	0.00211041	0.0116263
ENSG00000140067	90050	FAM181A	14	14q32.12	family with sequence similarity 181 member A	2202	1.31493	0.00796707	0.0343187
ENSG00000165434	283209	PGM2L1	11	11q13.4	phosphoglucomutase 2-like 1	8820	1.31485	0.000592105	0.00420326
ENSG00000162552	54361	WNT4	1	1p36.23-p35.1	wingless-type MMTV integration site family member 4	4527	1.31474	0.000117373	0.00118085
ENSG00000164647	26872	STEAP1	7	7q21	six transmembrane epithelial antigen of the prostate 1	1625	1.31438	0.000231225	0.00199716
ENSG00000173848	10276	NET1	10	10p15	neuroepithelial cell transforming 1	4175	1.31181	3.02e-06	7.6e-05
ENSG00000108852	4355	MPP2	17	17q21.31	membrane protein, palmitoylated 2	6114	1.31134	0.00010269	0.00106834
ENSG00000077264	5063	PAK3	X	Xq23	p21 protein (Cdc42/Rac)-activated kinase 3	10312	1.31122	0.000141926	0.0013649
ENSG00000053108	23105	FSTL4	5	5q31.1	follistatin-like 4	6734	1.31088	0.000217514	0.00190694
ENSG00000124602	222643	UNC5CL	6	6p21.1	unc-5 family C-terminal like	3136	1.31028	0.0103519	0.0422344
ENSG00000158286	388591	RNF207	1	1p36.31	ring finger protein 207	6585	1.3102	0.000310347	0.00253236
ENSG00000125945	80818	ZNF436	1	1p36	zinc finger protein 436	4392	1.31013	1.3e-05	0.000231066
ENSG00000125726	970	CD70	19	19p13	CD70 molecule	1532	1.30897	0.00492451	0.0233632
ENSG00000162755	126823	KLHDC9	1	1q23.3	kelch domain containing 9	1720	1.30599	0.000540934	0.00390607
ENSG00000183918	4068	SH2D1A	X	Xq25	SH2 domain containing 1A	2990	1.30487	0.00764411	0.0331729
ENSG00000169992	57555	NLGN2	17	17p13.1	neuroligin 2	5550	1.30387	0.000202515	0.0018049
ENSG00000161544	114757	CYGB	17	17q25.1	cytoglobin	2949	1.30376	1.4e-05	0.000246197
ENSG00000048342	57545	CC2D2A	4	4p15.32	coiled-coil and C2 domain containing 2A	7606	1.3035	1.69e-05	0.000281842
ENSG00000213123	255758	TCTEX1D2	3	3q29	Tctex1 domain containing 2	1246	1.30348	0.000858246	0.00566721
ENSG00000125245	2841	GPR18	13	13q32	G protein-coupled receptor 18	1908	1.30266	0.000881506	0.00578384
ENSG00000147180	7552	ZNF711	X	Xq21.1	zinc finger protein 711	5004	1.29961	0.00195324	0.0109081
ENSG00000255150	493861	EID3	12	12q23.3	EP300 interacting inhibitor of differentiation 3	1464	1.2994	3.69e-05	0.00048901
ENSG00000206530	55779	CFAP44	3	3q13.2	cilia and flagella associated protein 44	12160	1.2988	0.00490844	0.0233034
ENSG00000182866	3932	LCK	1	1p34.3	LCK proto-oncogene, Src family tyrosine kinase	3339	1.29872	0.000326976	0.00262971
ENSG00000168421	399	RHOH	4	4p13	ras homolog family member H	6608	1.29716	4.58e-05	0.000583211
ENSG00000101003	9837	GINS1	20	20p11.21	GINS complex subunit 1 (Psf1 homolog)	4068	1.295	4.89e-05	0.000615336
ENSG00000018625	477	ATP1A2	1	1q23.2	ATPase, Na+/K+ transporting, alpha 2 polypeptide	6298	1.29402	0.00345478	0.0174337
ENSG00000104432	3574	IL7	8	8q12-q13	interleukin 7	3392	1.29345	0.000143881	0.00137934
ENSG00000262179	101929726	LOC101929726	6	-	uncharacterized LOC101929726	843	1.29151	0.000912716	0.0059566
ENSG00000169169	126129	CPT1C	19	19q13.33	carnitine palmitoyltransferase 1C	5864	1.28909	1.14e-05	0.000211225
ENSG00000115556	84812	PLCD4	2	2q35	phospholipase C delta 4	5867	1.28757	8.05e-05	0.000891863
ENSG00000159214	149473	CCDC24	1	1p34.1	coiled-coil domain containing 24	3554	1.28612	2.51e-05	0.000369162
ENSG00000145649	3001	GZMA	5	5q11-q12	granzyme A	894	1.28604	0.0104734	0.042614
ENSG00000176890	7298	TYMS	18	18p11.32	thymidylate synthetase	2470	1.28422	6.34e-05	0.000737736
ENSG00000168675	753	LDLRAD4	18	18p11.21	low density lipoprotein receptor class A domain containing 4	16759	1.28414	4.17e-05	0.000540533
ENSG00000119508	8013	NR4A3	9	9q22	nuclear receptor subfamily 4 group A member 3	6314	1.2822	0.00636193	0.0286255
ENSG00000226979	4049	LTA	6	6p21.3	lymphotoxin alpha	1737	1.28161	0.00112072	0.00698162
ENSG00000186310	4675	NAP1L3	X	Xq21.3-q22	nucleosome assembly protein 1-like 3	2639	1.28008	0.000275802	0.00229937
ENSG00000164692	1278	COL1A2	7	7q22.1	collagen, type I, alpha 2	11156	1.27971	0.00135954	0.00812998
ENSG00000142765	84958	SYTL1	1	1p36.11	synaptotagmin like 1	5584	1.2796	2.01e-05	0.000316927
ENSG00000105655	51477	ISYNA1	19	19p13.11	inositol-3-phosphate synthase 1	3284	1.2791	9.66e-06	0.000185296
ENSG00000156970	701	BUB1B	15	15q15	BUB1B, mitotic checkpoint serine/threonine kinase	4476	1.27819	0.000544002	0.003924
ENSG00000165905	120071	GYLTL1B	11	11p11.2	glycosyltransferase-like 1B	3115	1.27813	0.000109588	0.00112101
ENSG00000139289	22822	PHLDA1	12	12q15	pleckstrin homology-like domain, family A, member 1	8069	1.2772	0.00047053	0.00350121
ENSG00000152784	56978	PRDM8	4	4q21	PR domain containing 8	4588	1.27461	8.56e-06	0.000171018
ENSG00000079257	56925	LXN	3	3q25.32	latexin	1504	1.27395	4.27e-05	0.000550335
ENSG00000136943	1515	CTSV	9	9q22.2	cathepsin V	4700	1.27173	0.000921878	0.00600764
ENSG00000033170	2530	FUT8	14	14q24.3	fucosyltransferase 8 (alpha (1,6) fucosyltransferase)	6700	1.27111	1.33e-06	4.14e-05
ENSG00000105472	6320	CLEC11A	19	19q13.3	C-type lectin domain family 11 member A	1469	1.27088	1.24e-06	3.97e-05
ENSG00000165304	9833	MELK	9	9p13.2	maternal embryonic leucine zipper kinase	3087	1.26992	0.000105911	0.00109422
ENSG00000168229	5729	PTGDR	14	14q22.1	prostaglandin D2 receptor (DP)	3033	1.26986	0.00577459	0.0264164
ENSG00000090659	30835	CD209	19	19p13	CD209 molecule	4413	1.26976	0.000786543	0.00528467
ENSG00000167600	29785	CYP2S1	19	19q13.1	cytochrome P450 family 2 subfamily S member 1	2874	1.26876	2.11e-05	0.000328472
ENSG00000065357	1606	DGKA	12	12q13.3	diacylglycerol kinase alpha	10215	1.26864	3.64e-05	0.000484273
ENSG00000116824	914	CD2	1	1p13.1	CD2 molecule	1679	1.26721	0.0019308	0.0107917
ENSG00000182749	164091	PAQR7	1	1p36.11	progestin and adipoQ receptor family member VII	3297	1.26715	1.25e-06	3.99e-05
ENSG00000143768	7044	LEFTY2	1	1q42.1	left-right determination factor 2	2392	1.26465	0.00228065	0.0124014
ENSG00000165084	116328	C8orf34	8	8q13	chromosome 8 open reading frame 34	10499	1.2638	7.08e-07	2.71e-05
ENSG00000035499	55789	DEPDC1B	5	5q12.1	DEP domain containing 1B	3806	1.26262	8.81e-05	0.000952505
ENSG00000130032	79057	PRRG3	X	Xq28	proline rich Gla (G-carboxyglutamic acid) 3 (transmembrane)	6364	1.26258	0.00340619	0.0172311
ENSG00000154330	5239	PGM5	9	9q13	phosphoglucomutase 5	7426	1.26233	6.9e-06	0.000146333
ENSG00000265190	653145	ANXA8	10	10q11.22	annexin A8	4955	1.26198	0.00244937	0.0131275
ENSG00000224389	721	C4B	6	6p21.3	complement component 4B (Chido blood group)	7116	1.26036	0.00787838	0.034013
ENSG00000160097	252995	FNDC5	1	1p35.1	fibronectin type III domain containing 5	3139	1.26013	5.08e-05	0.00063271
ENSG00000077157	4660	PPP1R12B	1	1q32.1	protein phosphatase 1 regulatory subunit 12B	21069	1.25618	0.000179911	0.00163049
ENSG00000196684	84941	HSH2D	19	19p13.12	hematopoietic SH2 domain containing	3398	1.25543	3.39e-05	0.000462537
ENSG00000172215	10663	CXCR6	3	3p21	chemokine (C-X-C motif) receptor 6	3769	1.25425	0.00978929	0.0402695
ENSG00000147799	80728	ARHGAP39	8	8q24.3	Rho GTPase activating protein 39	4888	1.25344	0.000249872	0.00212946
ENSG00000163704	285368	PRRT3	3	3p25.3	proline-rich transmembrane protein 3	3939	1.25336	2.2e-05	0.000337425
ENSG00000138160	3832	KIF11	10	10q24.1	kinesin family member 11	4860	1.25326	9.31e-05	0.000991406
ENSG00000138131	84171	LOXL4	10	10q24	lysyl oxidase like 4	3653	1.25267	7.79e-06	0.000159356
ENSG00000095397	25861	DFNB31	9	9q32	deafness, autosomal recessive 31	5542	1.2512	0.000142971	0.00137258
ENSG00000171617	8507	ENC1	5	5q13	ectodermal-neural cortex 1 (with BTB domain)	5858	1.25048	0.000924191	0.00601687
ENSG00000179909	7710	ZNF154	19	19q13.4	zinc finger protein 154	5713	1.24944	0.00434074	0.0211381
ENSG00000090104	5996	RGS1	1	1q31	regulator of G-protein signaling 1	4117	1.24867	0.00899855	0.037745
ENSG00000139926	122786	FRMD6	14	14q22.1	FERM domain containing 6	9416	1.24638	0.000922851	0.00601106
ENSG00000101230	140862	ISM1	20	20p12.1	isthmin 1, angiogenesis inhibitor	2593	1.24601	0.000421718	0.00321276
ENSG00000165480	221150	SKA3	13	13q12.11	spindle and kinetochore associated complex subunit 3	3048	1.24367	0.000171389	0.00157202
ENSG00000103269	9028	RHBDL1	16	16p13.3	rhomboid, veinlet-like 1 (Drosophila)	1884	1.24358	0.000353038	0.00279085
ENSG00000179397	257044	C1orf101	1	1q44	chromosome 1 open reading frame 101	4333	1.24253	0.000482401	0.00357177
ENSG00000135502	65012	SLC26A10	12	12q13	solute carrier family 26 member 10	4276	1.24175	7.3e-05	0.000823435
ENSG00000184845	1812	DRD1	5	5q35.1	dopamine receptor D1	4054	1.24165	0.00106485	0.00671139
ENSG00000168032	956	ENTPD3	3	3p21.3	ectonucleoside triphosphate diphosphohydrolase 3	3365	1.24005	4.75e-05	0.000599183
ENSG00000104290	7976	FZD3	8	8p21	frizzled class receptor 3	13787	1.2396	0.000106427	0.00109871
ENSG00000198336	4635	MYL4	17	17q21.32	myosin light chain 4	1636	1.23902	0.000184775	0.00166669
ENSG00000277117	102723996	LOC102723996	21	-	ICOS ligand	3357	1.23839	0.00120223	0.0073806
ENSG00000145386	890	CCNA2	4	4q27	cyclin A2	2798	1.2379	0.000462263	0.00345395
ENSG00000080493	8671	SLC4A4	4	4q21	solute carrier family 4 (sodium bicarbonate cotransporter), member 4	8361	1.23782	0.00156536	0.00914101
ENSG00000205403	3426	CFI	4	4q25	complement factor I	3875	1.23622	0.000149746	0.00142338
ENSG00000087510	7022	TFAP2C	20	20q13.2	transcription factor AP-2 gamma (activating enhancer binding protein 2 gamma)	3005	1.23463	3.33e-05	0.000457169
ENSG00000080854	22997	IGSF9B	11	11q25	immunoglobulin superfamily member 9B	5753	1.23455	0.00341062	0.017247
ENSG00000144057	84620	ST6GAL2	2	2q12.3	ST6 beta-galactosamide alpha-2,6-sialyltranferase 2	7708	1.23449	0.000984476	0.00629439
ENSG00000166483	7465	WEE1	11	11p15.4	WEE1 G2 checkpoint kinase	9239	1.23447	0.00016899	0.00155282
ENSG00000122861	5328	PLAU	10	10q22.2	plasminogen activator, urokinase	2950	1.23422	0.000771529	0.0052151
ENSG00000111145	2004	ELK3	12	12q23	ELK3, ETS-domain protein (SRF accessory protein 2)	4648	1.2333	8.29e-05	0.000911983
ENSG00000131620	55107	ANO1	11	11q13.3	anoctamin 1, calcium activated chloride channel	6021	1.23188	0.00185491	0.0104634
ENSG00000184702	5413	2021-09-05	22	22q11.21	septin 5	5914	1.23155	4.38e-05	0.000563285
ENSG00000140451	80119	PIF1	15	15q22.31	PIF1 5'-to-3' DNA helicase	4656	1.23155	7.05e-05	0.000798696
ENSG00000166851	5347	PLK1	16	16p12.2	polo-like kinase 1	4760	1.23102	2.32e-05	0.000349431
ENSG00000152253	57405	SPC25	2	2q31.1	SPC25, NDC80 kinetochore complex component	1841	1.23068	5.57e-05	0.000677064
ENSG00000135426	9840	TESPA1	12	12q13.2	thymocyte expressed, positive selection associated 1	5025	1.22897	0.00110584	0.00690814
ENSG00000172403	171024	SYNPO2	4	4q26	synaptopodin 2	14034	1.22829	0.000281152	0.00233673
ENSG00000223572	548596	CKMT1A	15	15q15	creatine kinase, mitochondrial 1A	3109	1.22746	0.00897521	0.0376707
ENSG00000179403	64856	VWA1	1	1p36.33	von Willebrand factor A domain containing 1	5065	1.227	9.63e-06	0.000185011
ENSG00000114923	6508	SLC4A3	2	2q36	solute carrier family 4 (anion exchanger), member 3	5091	1.22657	3.99e-05	0.000523328
ENSG00000183765	11200	CHEK2	22	22q12.1	checkpoint kinase 2	4142	1.22624	2.8e-06	7.22e-05
ENSG00000198520	339541	C1orf228	1	1p34.1	chromosome 1 open reading frame 228	3166	1.22559	0.000119461	0.00119381
ENSG00000101057	4605	MYBL2	20	20q13.1	v-myb avian myeloblastosis viral oncogene homolog-like 2	2777	1.22532	2.19e-05	0.000336836
ENSG00000159784	9715	FAM131B	7	7q34	family with sequence similarity 131 member B	6430	1.22511	0.000192971	0.00172786
ENSG00000159164	9900	SV2A	1	1q21.2	synaptic vesicle glycoprotein 2A	4824	1.22334	0.00313516	0.0160842
ENSG00000214357	54492	NEURL1B	5	5q35.1	neuralized E3 ubiquitin protein ligase 1B	6424	1.22261	0.00012778	0.0012573
ENSG00000090539	8646	CHRD	3	3q27	chordin	6620	1.22155	5.44e-05	0.000667487
ENSG00000132004	84261	FBXW9	19	19p13.2	F-box and WD repeat domain containing 9	2114	1.22077	1.81e-05	0.000295609
ENSG00000119969	3070	HELLS	10	10q24.2	helicase, lymphoid-specific	10148	1.21981	0.000408821	0.00313049
ENSG00000137265	3662	IRF4	6	6p25.3	interferon regulatory factor 4	5898	1.21896	0.00327383	0.0166682
ENSG00000078269	8871	SYNJ2	6	6q25.3	synaptojanin 2	9921	1.21794	0.000256642	0.00217474
ENSG00000135253	375616	KCP	7	7q32.1	kielin/chordin-like protein	8259	1.21431	0.000155332	0.00145969
ENSG00000100968	4776	NFATC4	14	14q11.2	nuclear factor of activated T-cells, cytoplasmic, calcineurin-dependent 4	8437	1.21427	6.72e-06	0.000143596
ENSG00000114770	10057	ABCC5	3	3q27	ATP binding cassette subfamily C member 5	11441	1.21372	0.000221113	0.00192918
ENSG00000100558	26499	PLEK2	14	14q23.3	pleckstrin 2	1603	1.21309	4.91e-05	0.000615652
ENSG00000104081	90427	BMF	15	15q14	Bcl2 modifying factor	5447	1.21294	4.76e-05	0.000599871
ENSG00000172572	5139	PDE3A	12	12p12	phosphodiesterase 3A	8398	1.21165	0.000698277	0.00479232
ENSG00000175063	11065	UBE2C	20	20q13.12	ubiquitin conjugating enzyme E2C	1286	1.21157	6.21e-05	0.000729821
ENSG00000137809	22801	ITGA11	15	15q23	integrin subunit alpha 11	10864	1.21061	0.0122816	0.0482745
ENSG00000173068	54796	BNC2	9	9p22.2	basonuclin 2	15323	1.20951	0.00039902	0.00306944
ENSG00000260807	64788	LMF1	16	16p13.3	lipase maturation factor 1	3905	1.2093	0.00307932	0.0158582
ENSG00000095970	54209	TREM2	6	6p21.1	triggering receptor expressed on myeloid cells 2	1095	1.20927	0.00119041	0.00732067
ENSG00000162595	9077	DIRAS3	1	1p31	DIRAS family, GTP-binding RAS-like 3	1973	1.20866	0.000343205	0.00273404
ENSG00000134198	10100	TSPAN2	1	1p13.2	tetraspanin 2	3410	1.20814	0.00106075	0.00668868
ENSG00000263961	440712	C1orf186	1	1q32.1	chromosome 1 open reading frame 186	3557	1.20681	0.00546754	0.0254187
ENSG00000162745	25903	OLFML2B	1	1q23.3	olfactomedin like 2B	3415	1.20672	0.000159283	0.00148358
ENSG00000148154	7357	UGCG	9	9q31	UDP-glucose ceramide glucosyltransferase	4615	1.20565	0.00026033	0.00219958
ENSG00000198286	84433	CARD11	7	7p22	caspase recruitment domain family member 11	4707	1.20524	0.000244777	0.00209135
ENSG00000243649	629	CFB	6	6p21.3	complement factor B	4997	1.20484	0.00105594	0.00666148
ENSG00000166171	25911	DPCD	10	10q24.32	deleted in primary ciliary dyskinesia homolog (mouse)	1718	1.2034	0.000128858	0.00126513
ENSG00000150347	84159	ARID5B	10	10q21.2	AT-rich interaction domain 5B	8164	1.20328	0.000326796	0.00262971
ENSG00000108797	8506	CNTNAP1	17	17q21	contactin associated protein 1	6045	1.2031	0.0004852	0.00358652
ENSG00000138378	6775	STAT4	2	2q32.2-q32.3	signal transducer and activator of transcription 4	4250	1.20309	0.000351937	0.00278735
ENSG00000153563	925	CD8A	2	2p12	CD8a molecule	3634	1.20259	0.00191596	0.0107266
ENSG00000074706	26034	IPCEF1	6	6q25.2	interaction protein for cytohesin exchange factors 1	8474	1.20214	0.000864943	0.00570022
ENSG00000176531	653583	PHLDB3	19	19q13.31	pleckstrin homology-like domain, family B, member 3	4553	1.19866	1.18e-05	0.000216598
ENSG00000163521	79411	GLB1L	2	2q35	galactosidase beta 1 like	3411	1.19788	2.23e-05	0.000339824
ENSG00000125378	652	BMP4	14	14q22-q23	bone morphogenetic protein 4	3082	1.19568	0.000149338	0.00142051
ENSG00000134013	4017	LOXL2	8	8p21.3	lysyl oxidase like 2	5707	1.19509	0.000828404	0.00551353
ENSG00000276231	146850	PIK3R6	17	17p13.1	phosphoinositide-3-kinase regulatory subunit 6	3564	1.19456	5.02e-05	0.000625271
ENSG00000189045	728780	ANKDD1B	5	5q13.3	ankyrin repeat and death domain containing 1B	3287	1.193	0.000291927	0.00241433
ENSG00000130598	7136	TNNI2	11	11p15.5	troponin I type 2 (skeletal, fast)	1082	1.19238	0.00155178	0.00907352
ENSG00000144031	79998	ANKRD53	2	2p13.3	ankyrin repeat domain 53	2526	1.19155	0.000666514	0.00461679
ENSG00000177103	57453	DSCAML1	11	11q23	Down syndrome cell adhesion molecule like 1	7035	1.19055	0.00359782	0.0180442
ENSG00000163485	134	ADORA1	1	1q32.1	adenosine A1 receptor	4191	1.18966	0.000469656	0.00349664
ENSG00000173641	27129	HSPB7	1	1p36.13	heat shock protein family B (small) member 7	3910	1.18886	0.000574946	0.00410532
ENSG00000162999	142679	DUSP19	2	2q32.1	dual specificity phosphatase 19	5376	1.18766	0.000734465	0.00499957
ENSG00000162746	127943	FCRLB	1	1q23.3	Fc receptor-like B	2592	1.18744	4.91e-05	0.000615652
ENSG00000115884	6382	SDC1	2	2p24.1	syndecan 1	3595	1.18701	5.84e-05	0.000698504
ENSG00000162881	165140	OXER1	2	2p21	oxoeicosanoid (OXE) receptor 1	1781	1.18688	0.000179344	0.00162644
ENSG00000183807	221303	FAM162B	6	6q22.1	family with sequence similarity 162 member B	1036	1.18676	0.000264977	0.0022271
ENSG00000171848	6241	RRM2	2	2p25-p24	ribonucleotide reductase M2	4955	1.18629	0.000479593	0.00356076
ENSG00000175130	65108	MARCKSL1	1	1p35.1	MARCKS-like 1	1699	1.18614	2.15e-05	0.000332098
ENSG00000121653	9479	MAPK8IP1	11	11p11.2	mitogen-activated protein kinase 8 interacting protein 1	3498	1.18581	2.85e-05	0.000407929
ENSG00000130037	3741	KCNA5	12	12p13	potassium channel, voltage gated shaker related subfamily A, member 5	2800	1.18535	0.00182963	0.0103381
ENSG00000255690	9865	TRIL	7	7p14.3	TLR4 interactor with leucine-rich repeats	4935	1.18531	0.0019635	0.0109472
ENSG00000172236	7177	TPSAB1	16	16p13.3	tryptase alpha/beta 1	1512	1.185	0.00556983	0.0258049
ENSG00000143228	83540	NUF2	1	1q23.3	NUF2, NDC80 kinetochore complex component	3362	1.18249	0.000240509	0.00205969
ENSG00000120820	83468	GLT8D2	12	12q	glycosyltransferase 8 domain containing 2	3271	1.18179	5.96e-05	0.000707207
ENSG00000101333	5332	PLCB4	20	20p12	phospholipase C beta 4	6900	1.18115	0.00147116	0.00869683
ENSG00000172738	221468	TMEM217	6	6p21.2	transmembrane protein 217	2737	1.1811	0.00030881	0.00252442
ENSG00000182185	5890	RAD51B	14	14q23-q24.2	RAD51 paralog B	7477	1.18047	1.1e-06	3.65e-05
ENSG00000107317	5730	PTGDS	9	9q34.2-q34.3	prostaglandin D2 synthase	2378	1.17617	0.00123816	0.00753838
ENSG00000168778	79867	TCTN2	12	12q24.31	tectonic family member 2	5106	1.17188	1.99e-05	0.000314091
ENSG00000135318	4907	NT5E	6	6q14-q21	5'-nucleotidase, ecto (CD73)	4533	1.17109	0.000118464	0.00118916
ENSG00000169855	6091	ROBO1	3	3p12	roundabout guidance receptor 1	10875	1.16984	0.00585177	0.0266967
ENSG00000185885	8519	IFITM1	11	11p15.5	interferon induced transmembrane protein 1	1080	1.16936	2.46e-06	6.62e-05
ENSG00000143224	5498	PPOX	1	1q22	protoporphyrinogen oxidase	4607	1.16853	0.000415338	0.00317496
ENSG00000039139	1767	DNAH5	5	5p15.2	dynein, axonemal, heavy chain 5	16475	1.16691	0.0056198	0.0259647
ENSG00000120708	7045	TGFBI	5	5q31	transforming growth factor beta induced	7810	1.16587	3.41e-05	0.000463097
ENSG00000136059	50853	VILL	3	3p21.3	villin-like	6476	1.16575	1.02e-05	0.000193246
ENSG00000169684	1138	CHRNA5	15	15q24	cholinergic receptor, nicotinic alpha 5	3623	1.16516	0.000194817	0.00174091
ENSG00000213088	2532	ACKR1	1	1q21-q22	atypical chemokine receptor 1 (Duffy blood group)	2106	1.16384	6.58e-05	0.000757147
ENSG00000112796	59084	ENPP5	6	6p21.1-p11.2	ectonucleotide pyrophosphatase/phosphodiesterase 5 (putative)	4264	1.16348	8.37e-05	0.000916756
ENSG00000163013	150726	FBXO41	2	2p13.2	F-box protein 41	8011	1.16332	6.73e-05	0.000770246
ENSG00000174628	124152	IQCK	16	16p12.3	IQ motif containing K	4993	1.16297	3.38e-05	0.000462438
ENSG00000198795	25925	ZNF521	18	18q11.2	zinc finger protein 521	6223	1.16288	0.000415857	0.00317712
ENSG00000072133	27330	RPS6KA6	X	Xq21	ribosomal protein S6 kinase, 90kDa, polypeptide 6	8502	1.16199	0.00016197	0.00150236
ENSG00000088325	22974	TPX2	20	20q11.2	TPX2, microtubule-associated	3605	1.16159	0.00020638	0.00182842
ENSG00000075218	51512	GTSE1	22	22q13.2-q13.3	G2 and S-phase expressed 1	4242	1.16083	6.29e-05	0.000733795
ENSG00000168772	80319	CXXC4	4	4q24	CXXC finger protein 4	5819	1.16068	0.00291162	0.015128
ENSG00000197261	135398	C6orf141	6	6p12.3	chromosome 6 open reading frame 141	2940	1.16068	0.000510057	0.00372112
ENSG00000131187	2161	F12	5	5q35.3	coagulation factor XII (Hageman factor)	2769	1.16013	8.24e-05	0.000907759
ENSG00000155265	401647	GOLGA7B	10	10q24.2	golgin A7 family member B	6458	1.15911	1.09e-05	0.000203998
ENSG00000148053	4915	NTRK2	9	9q22.1	neurotrophic tyrosine kinase, receptor, type 2	20363	1.15886	0.00732472	0.0321183
ENSG00000171428	9	NAT1	8	8p22	N-acetyltransferase 1 (arylamine N-acetyltransferase)	3168	1.15869	0.000527101	0.00382469
ENSG00000214575	64506	CPEB1	15	15q25.2	cytoplasmic polyadenylation element binding protein 1	8215	1.15844	0.000270263	0.00226585
ENSG00000100385	3560	IL2RB	22	22q13.1	interleukin 2 receptor subunit beta	4700	1.15784	0.00315053	0.0161378
ENSG00000107611	8029	CUBN	10	10p12.31	cubilin	13168	1.15712	0.00281878	0.0147069
ENSG00000152503	55521	TRIM36	5	5q22.3	tripartite motif containing 36	6113	1.15686	0.000428833	0.00325322
ENSG00000070087	5217	PFN2	3	3q25.1	profilin 2	3440	1.15686	3.59e-05	0.000478845
ENSG00000164611	9232	PTTG1	5	5q35.1	pituitary tumor-transforming 1	2013	1.15494	0.000144243	0.00138183
ENSG00000149328	89944	GLB1L2	11	11q25	galactosidase beta 1 like 2	7280	1.15461	0.000100734	0.00105371
ENSG00000198246	55315	SLC29A3	10	10q22.1	solute carrier family 29 (equilibrative nucleoside transporter), member 3	2684	1.15355	6.24e-05	0.000730832
ENSG00000144134	11159	RABL2A	2	2q13	RAB, member of RAS oncogene family-like 2A	6008	1.15266	0.000209237	0.00184696
ENSG00000093009	8318	CDC45	22	22q11.21	cell division cycle 45	2846	1.15113	0.000973068	0.00624726
ENSG00000122224	4063	LY9	1	1q23.3	lymphocyte antigen 9	9118	1.14908	0.00971253	0.040015
ENSG00000150593	27250	PDCD4	10	10q24	programmed cell death 4 (neoplastic transformation inhibitor)	4547	1.14705	5.92e-05	0.000704408
ENSG00000154917	51560	RAB6B	3	3q22.1	RAB6B, member RAS oncogene family	6005	1.14683	0.000231853	0.0020013
ENSG00000168078	55872	PBK	8	8p21.2	PDZ binding kinase	2165	1.14673	0.00310906	0.0159686
ENSG00000130005	2593	GAMT	19	19p13.3	guanidinoacetate N-methyltransferase	1743	1.14444	6.28e-05	0.000733795
ENSG00000110660	54733	SLC35F2	11	11q22.3	solute carrier family 35 member F2	3717	1.14435	0.000283151	0.00234898
ENSG00000256061	161582	DYX1C1	15	15q21.3	dyslexia susceptibility 1 candidate 1	2934	1.14378	2.2e-05	0.000337485
ENSG00000137033	90865	IL33	9	9p24.1	interleukin 33	3253	1.14285	0.00101828	0.00646337
ENSG00000178053	4291	MLF1	3	3q25.1	myeloid leukemia factor 1	3569	1.14202	6.05e-05	0.000716179
ENSG00000018236	1272	CNTN1	12	12q11-q12	contactin 1	7492	1.14162	0.00181617	0.0102751
ENSG00000111728	6489	ST8SIA1	12	12p12.1-p11.2	ST8 alpha-N-acetyl-neuraminide alpha-2,8-sialyltransferase 1	14483	1.14101	0.00148015	0.00873839
ENSG00000109339	5602	MAPK10	4	4q22.1-q23	mitogen-activated protein kinase 10	9816	1.14078	6.72e-05	0.000769729
ENSG00000153292	266977	ADGRF1	6	6p12.3	adhesion G protein-coupled receptor F1	12401	1.14017	0.0121125	0.0477917
ENSG00000150471	23284	ADGRL3	4	4q13.1	adhesion G protein-coupled receptor L3	13998	1.14005	0.000933287	0.00605655
ENSG00000136425	10518	CIB2	15	15q24	calcium and integrin binding family member 2	2146	1.13915	3.73e-05	0.000492949
ENSG00000132000	79883	PODNL1	19	19p13.12	podocan-like 1	4168	1.13737	0.00046434	0.00346475
ENSG00000134668	90853	SPOCD1	1	1p35.2	SPOC domain containing 1	7085	1.13556	0.000854616	0.00565157
ENSG00000113361	1004	CDH6	5	5p13.3	cadherin 6, type 2, K-cadherin (fetal kidney)	12379	1.13554	0.00134403	0.00805064
ENSG00000147168	3561	IL2RG	X	Xq13.1	interleukin 2 receptor subunit gamma	2760	1.134	0.000442195	0.0033291
ENSG00000239521	352954	GATS	7	7q22.1	GATS, stromal antigen 3 opposite strand	4860	1.1339	7.93e-05	0.000883204
ENSG00000127324	7103	TSPAN8	12	12q14.1-q21.1	tetraspanin 8	2519	1.13377	0.00190801	0.0106911
ENSG00000086696	3294	HSD17B2	16	16q24.1-q24.2	hydroxysteroid (17-beta) dehydrogenase 2	9550	1.13272	0.00488603	0.0232216
ENSG00000162738	57216	VANGL2	1	1q22-q23	VANGL planar cell polarity protein 2	5340	1.13136	0.000688227	0.00473544
ENSG00000166352	119710	C11orf74	11	11p12	chromosome 11 open reading frame 74	1474	1.12969	9.26e-05	0.000987798
ENSG00000138606	90525	SHF	15	15q21.1	Src homology 2 domain containing F	4894	1.12938	2.87e-05	0.000410739
ENSG00000103647	10391	CORO2B	15	15q23	coronin, actin binding protein, 2B	3998	1.12871	0.00112304	0.00699121
ENSG00000158106	114822	RHPN1	8	8q24.3	rhophilin, Rho GTPase binding protein 1	4204	1.12629	0.000340539	0.00271763
ENSG00000178498	196403	DTX3	12	12q13.3	deltex 3, E3 ubiquitin ligase	4087	1.12589	0.000159632	0.00148561
ENSG00000215788	8718	TNFRSF25	1	1p36.2	tumor necrosis factor receptor superfamily member 25	3918	1.1252	0.00432793	0.0210916
ENSG00000100629	145508	CEP128	14	14q31.1	centrosomal protein 128kDa	9400	1.1237	0.000381995	0.0029708
ENSG00000006042	26022	TMEM98	17	17q11.2	transmembrane protein 98	5187	1.1237	2.26e-05	0.000343601
ENSG00000088727	64147	KIF9	3	3p21.31	kinesin family member 9	5850	1.12292	8.16e-05	0.000900724
ENSG00000112378	64065	PERP	6	6q24	PERP, TP53 apoptosis effector	4290	1.12254	1.2e-05	0.00021899
ENSG00000100376	55007	FAM118A	22	22q13	family with sequence similarity 118 member A	6512	1.12186	0.00332648	0.0169053
ENSG00000089091	55184	DZANK1	20	20p11.23	double zinc ribbon and ankyrin repeat domains 1	6619	1.12008	0.000360494	0.00283477
ENSG00000271858	11068	CYB561D2	3	3p21.3	cytochrome b561 family member D2	1202	1.11956	0.000329011	0.00263661
ENSG00000213928	10379	IRF9	14	14q11.2	interferon regulatory factor 9	3794	1.11892	0.00240342	0.0129432
ENSG00000196639	3269	HRH1	3	3p25	histamine receptor H1	5546	1.11853	0.000258782	0.00218873
ENSG00000158457	340348	TSPAN33	7	7q32.1	tetraspanin 33	2750	1.117	8.07e-05	0.000893168
ENSG00000225614	84627	ZNF469	16	16q24	zinc finger protein 469	13287	1.11668	0.00186376	0.0105001
ENSG00000057657	639	PRDM1	6	6q21	PR domain containing 1, with ZNF domain	6369	1.11476	0.00210283	0.0115963
ENSG00000163596	130026	ICA1L	2	2q33.2	islet cell autoantigen 1 like	10598	1.11454	0.00268852	0.014194
ENSG00000102935	23090	ZNF423	16	16q12	zinc finger protein 423	8997	1.11345	0.00602633	0.0273537
ENSG00000134874	22873	DZIP1	13	13q32.1	DAZ interacting zinc finger protein 1	8470	1.11299	0.00221347	0.0121223
ENSG00000214290	120376	COLCA2	11	11q23.1	colorectal cancer associated 2	2068	1.11226	0.000179114	0.001626
ENSG00000105559	57664	PLEKHA4	19	19q13.33	pleckstrin homology domain containing A4	3851	1.11207	5.21e-05	0.000643111
ENSG00000158008	2134	EXTL1	1	1p36.1	exostosin-like glycosyltransferase 1	4537	1.11133	0.0012246	0.00748297
ENSG00000072571	3161	HMMR	5	5q34	hyaluronan-mediated motility receptor (RHAMM)	3936	1.10946	0.00314082	0.016107
ENSG00000221829	2189	FANCG	9	9p13	Fanconi anemia complementation group G	3614	1.10734	2.07e-06	5.82e-05
ENSG00000184986	80757	TMEM121	14	14q32.33	transmembrane protein 121	1904	1.10706	0.00094322	0.00610231
ENSG00000110811	10536	P3H3	12	12p13.31	prolyl 3-hydroxylase 3	4601	1.10675	1.77e-05	0.000291942
ENSG00000198851	916	CD3E	11	11q23	CD3e molecule, epsilon (CD3-TCR complex)	2844	1.10589	0.00525954	0.0246581
ENSG00000005001	64063	PRSS22	16	16p13.3	protease, serine 22	2387	1.10572	0.000348985	0.0027735
ENSG00000163106	27306	HPGDS	4	4q22.3	hematopoietic prostaglandin D synthase	2111	1.10546	0.000236066	0.00203244
ENSG00000177685	283229	CRACR2B	11	11p15.5	calcium release activated channel regulator 2B	3913	1.10487	0.00072104	0.00492338
ENSG00000091831	2099	ESR1	6	6q25.1	estrogen receptor 1	13629	1.10343	0.00291765	0.0151452
ENSG00000159079	56683	C21orf59	21	21q22.1	chromosome 21 open reading frame 59	3353	1.10341	2.35e-05	0.000352062
ENSG00000185467	402569	KPNA7	7	7q22.1	karyopherin alpha 7 (importin alpha 8)	1725	1.10182	0.000891451	0.00583484
ENSG00000204852	79600	TCTN1	12	12q24.11	tectonic family member 1	9605	1.10148	3.53e-05	0.000473177
ENSG00000164946	158326	FREM1	9	9p22.3	FRAS1 related extracellular matrix 1	10762	1.09897	0.00727647	0.0319589
ENSG00000070882	26031	OSBPL3	7	7p15	oxysterol binding protein like 3	8100	1.0985	0.00168979	0.00969897
ENSG00000091073	113878	DTX2	7	7q11.23	deltex 2, E3 ubiquitin ligase	5042	1.09783	6.45e-06	0.000138839
ENSG00000183248	80164	PRR36	19	19p13.2	proline rich 36	4456	1.0971	0.0024852	0.0132771
ENSG00000167550	121268	RHEBL1	12	12q13.12	Ras homolog enriched in brain like 1	1290	1.09668	0.00129907	0.00783816
ENSG00000163354	127579	DCST2	1	1q22	DC-STAMP domain containing 2	3071	1.09324	0.0011233	0.00699121
ENSG00000075884	55843	ARHGAP15	2	2q22.2-q22.3	Rho GTPase activating protein 15	7743	1.09275	0.000633303	0.00442554
ENSG00000135451	10024	TROAP	12	12q13.12	trophinin associated protein	3954	1.09263	0.000351973	0.00278735
ENSG00000166741	4837	NNMT	11	11q23.1	nicotinamide N-methyltransferase	2919	1.09227	0.00377698	0.0188023
ENSG00000185664	6490	PMEL	12	12q13-q14	premelanosome protein	3901	1.09194	0.0105215	0.0427403
ENSG00000203814	440689	HIST2H2BF	1	1q21.2	histone cluster 2, H2bf	3196	1.09183	0.00930388	0.0386874
ENSG00000107796	59	ACTA2	10	10q23.3	actin, alpha 2, smooth muscle, aorta	3027	1.0918	0.00169304	0.00971348
ENSG00000162998	2487	FRZB	2	2q32.1	frizzled-related protein	3162	1.09164	0.00562482	0.025979
ENSG00000103056	55512	SMPD3	16	16q22.1	sphingomyelin phosphodiesterase 3	7166	1.09156	0.00097267	0.00624726
ENSG00000085999	8438	RAD54L	1	1p32	RAD54-like (S. cerevisiae)	3212	1.09072	0.000177248	0.00161398
ENSG00000130038	84766	CRACR2A	12	12p13.32	calcium release activated channel regulator 2A	12466	1.09063	0.000451531	0.00338571
ENSG00000139182	9746	CLSTN3	12	12p13.31	calsyntenin 3	6865	1.09013	0.000168085	0.00154627
ENSG00000141622	494470	RNF165	18	18q21.1	ring finger protein 165	11419	1.08898	0.00566396	0.0261059
ENSG00000116885	127700	OSCP1	1	1p34.3	organic solute carrier partner 1	2788	1.08892	0.000845932	0.00560351
ENSG00000128581	64792	IFT22	7	7q22.1	intraflagellar transport 22	4132	1.08622	0.000104898	0.00108543
ENSG00000124225	56937	PMEPA1	20	20q13.31-q13.33	prostate transmembrane protein, androgen induced 1	5619	1.08579	0.000372105	0.00290905
ENSG00000169607	150468	CKAP2L	2	2q13	cytoskeleton associated protein 2 like	5219	1.08528	0.000857422	0.00566721
ENSG00000112559	4188	MDFI	6	6p21	MyoD family inhibitor	2523	1.08515	0.00039775	0.00306331
ENSG00000182916	56849	TCEAL7	X	Xq22.1	transcription elongation factor A (SII)-like 7	1177	1.08491	9.09e-05	0.000973272
ENSG00000113657	1809	DPYSL3	5	5q32	dihydropyrimidinase like 3	7164	1.08474	0.00150741	0.00886815
ENSG00000105948	79989	TTC26	7	7q34	tetratricopeptide repeat domain 26	4999	1.08237	0.000436626	0.00330385
ENSG00000178999	9212	AURKB	17	17p13.1	aurora kinase B	2241	1.08133	0.000121511	0.00120621
ENSG00000138166	1847	DUSP5	10	10q25	dual specificity phosphatase 5	2615	1.0812	0.00253214	0.013485
ENSG00000059915	5662	PSD	10	10q24	pleckstrin and Sec7 domain containing	6338	1.08056	3.42e-05	0.000464943
ENSG00000184828	201501	ZBTB7C	18	18q21.1	zinc finger and BTB domain containing 7C	7648	1.08034	2.05e-05	0.000321406
ENSG00000171357	541468	LURAP1	1	1p34	leucine rich adaptor protein 1	1854	1.07679	0.000872813	0.00573922
ENSG00000002933	55365	TMEM176A	7	7q36.1	transmembrane protein 176A	3479	1.07457	0.000205639	0.00182327
ENSG00000103351	23059	CLUAP1	16	16p13.3	clusterin associated protein 1	7798	1.07443	1.44e-05	0.000251272
ENSG00000088320	28954	REM1	20	20q11.21	RAS (RAD and GEM)-like GTP-binding 1	1665	1.07428	0.00150958	0.00887319
ENSG00000122417	57489	ODF2L	1	1p22.3	outer dense fiber of sperm tails 2-like	10898	1.07289	0.00932681	0.0387235
ENSG00000149050	7761	ZNF214	11	11p15.4	zinc finger protein 214	2949	1.07274	0.00621365	0.0280722
ENSG00000105767	199731	CADM4	19	19q13.31	cell adhesion molecule 4	2246	1.07244	2.72e-05	0.000392762
ENSG00000158714	56833	SLAMF8	1	1q23.2	SLAM family member 8	2996	1.07175	0.000496893	0.00366288
ENSG00000148814	80313	LRRC27	10	10q26.3	leucine rich repeat containing 27	9910	1.07129	1.52e-05	0.000261094
ENSG00000177989	440836	ODF3B	22	22q13.33	outer dense fiber of sperm tails 3B	2301	1.06996	0.00387068	0.0191538
ENSG00000136367	85446	ZFHX2	14	14q11.2	zinc finger homeobox 2	10128	1.06747	0.00762486	0.0331478
ENSG00000128203	57168	ASPHD2	22	22q12.1	aspartate beta-hydroxylase domain containing 2	3357	1.06592	0.000202315	0.00180431
ENSG00000121211	84057	MND1	4	4q31.3	meiotic nuclear divisions 1	1511	1.06584	0.00350686	0.0176605
ENSG00000171603	22883	CLSTN1	1	1p36.22	calsyntenin 1	5559	1.0658	0.000953097	0.00615731
ENSG00000105877	8701	DNAH11	7	7p21	dynein, axonemal, heavy chain 11	15998	1.06547	0.00435172	0.0211691
ENSG00000067057	5214	PFKP	10	10p15.3-p15.2	phosphofructokinase, platelet	4836	1.06532	0.000731857	0.00498963
ENSG00000066185	84217	ZMYND12	1	1p34.2	zinc finger, MYND-type containing 12	2195	1.065	0.00222427	0.0121451
ENSG00000050344	9603	NFE2L3	7	7p15.2	nuclear factor, erythroid 2 like 3	4249	1.06478	2.22e-05	0.000338964
ENSG00000135144	1840	DTX1	12	12q24.13	deltex 1, E3 ubiquitin ligase	4387	1.06415	0.00125135	0.00760148
ENSG00000185697	4603	MYBL1	8	8q13.1	v-myb avian myeloblastosis viral oncogene homolog-like 1	7239	1.06211	0.00192428	0.0107688
ENSG00000240771	115557	ARHGEF25	12	12q13.3	Rho guanine nucleotide exchange factor 25	3503	1.06176	0.000174546	0.00159478
ENSG00000079263	11262	SP140	2	2q37.1	SP140 nuclear body protein	5582	1.06162	0.00111357	0.00694676
ENSG00000162882	23498	HAAO	2	2p21	3-hydroxyanthranilate 3,4-dioxygenase	2726	1.06128	2.51e-05	0.000369162
ENSG00000106477	95681	CEP41	7	7q32	centrosomal protein 41kDa	12566	1.06126	4.73e-05	0.000597371
ENSG00000008118	57172	CAMK1G	1	1q32.2	calcium/calmodulin-dependent protein kinase IG	2676	1.05947	0.0083527	0.0356256
ENSG00000166707	644353	ZCCHC18	X	Xq22.2	zinc finger, CCHC domain containing 18	3389	1.05858	0.000181532	0.00164075
ENSG00000153283	10225	CD96	3	3q13.13-q13.2	CD96 molecule	5762	1.05683	0.00703799	0.0311916
ENSG00000178078	55620	STAP2	19	19p13.3	signal transducing adaptor family member 2	2766	1.05667	2.01e-05	0.00031672
ENSG00000174080	8722	CTSF	11	11q13	cathepsin F	2896	1.05622	0.000232923	0.00200924
ENSG00000119121	140803	TRPM6	9	9q21.13	transient receptor potential cation channel, subfamily M, member 6	9193	1.05588	4.8e-05	0.000603916
ENSG00000139116	55605	KIF21A	12	12q12	kinesin family member 21A	10114	1.05472	0.00308377	0.015869
ENSG00000079931	26002	MOXD1	6	6q23.2	monooxygenase, DBH-like 1	5293	1.05424	0.00151508	0.00889383
ENSG00000154553	27295	PDLIM3	4	4q35	PDZ and LIM domain 3	9117	1.05424	0.000585149	0.00416489
ENSG00000132329	10267	RAMP1	2	2q36-q37.1	receptor (G protein-coupled) activity modifying protein 1	1234	1.05395	0.0014324	0.00850136
ENSG00000132386	5176	SERPINF1	17	17p13.3	serpin peptidase inhibitor, clade F (alpha-2 antiplasmin, pigment epithelium derived factor), member 1	3069	1.05389	0.000357647	0.00281733
ENSG00000111665	83461	CDCA3	12	12p13	cell division cycle associated 3	5653	1.05337	5.73e-05	0.000688835
ENSG00000161996	197335	WDR90	16	16p13.3	WD repeat domain 90	10534	1.05117	0.000297715	0.00245465
ENSG00000150672	1740	DLG2	11	11q14.1	discs, large homolog 2 (Drosophila)	16089	1.05103	0.00051449	0.00375015
ENSG00000182175	56963	RGMA	15	15q26.1	repulsive guidance molecule family member a	13141	1.05087	0.00389633	0.0192608
ENSG00000145632	10769	PLK2	5	5q12.1-q13.2	polo-like kinase 2	4768	1.05059	0.000351851	0.00278735
ENSG00000100003	23541	SEC14L2	22	22q12.2	SEC14-like lipid binding 2	5985	1.04932	0.00192677	0.0107737
ENSG00000138002	26160	IFT172	2	2p23.3	intraflagellar transport 172	8401	1.04836	0.000480821	0.00356594
ENSG00000185924	146760	RTN4RL1	17	17p13.3	reticulon 4 receptor-like 1	3625	1.04811	0.00106795	0.00671832
ENSG00000112541	10846	PDE10A	6	6q26	phosphodiesterase 10A	12348	1.04769	0.0117972	0.0468365
ENSG00000171295	126070	ZNF440	19	19p13.2	zinc finger protein 440	6427	1.04686	0.00217232	0.0119233
ENSG00000124496	55809	TRERF1	6	6p21.1-p12.1	transcriptional regulating factor 1	7732	1.04569	0.00297653	0.0153938
ENSG00000023892	50619	DEF6	6	6p21.33-p21.1	DEF6, guanine nucleotide exchange factor	2545	1.04491	4.72e-05	0.000597371
ENSG00000123610	7130	TNFAIP6	2	2q23.3	TNF alpha induced protein 6	1579	1.04376	0.0116532	0.0464159
ENSG00000163453	3490	IGFBP7	4	4q12	insulin like growth factor binding protein 7	1930	1.04297	1.47e-05	0.000254952
ENSG00000167741	124975	GGT6	17	17p13.2	gamma-glutamyltransferase 6	3161	1.04226	0.000702724	0.00482037
ENSG00000168490	9796	PHYHIP	8	8p21.3	phytanoyl-CoA 2-hydroxylase interacting protein	4170	1.04187	0.0122398	0.0481524
ENSG00000154548	135295	SRSF12	6	6q15	serine/arginine-rich splicing factor 12	4548	1.04064	0.00321801	0.0164027
ENSG00000182580	2049	EPHB3	3	3q27.1	EPH receptor B3	4532	1.04029	0.00134447	0.00805064
ENSG00000198542	9358	ITGBL1	13	13q33	integrin subunit beta like 1	6174	1.03997	0.0118903	0.0471088
ENSG00000169604	84168	ANTXR1	2	2p13.1	anthrax toxin receptor 1	8185	1.03731	0.00314773	0.0161302
ENSG00000088826	54498	SMOX	20	20p13	spermine oxidase	2946	1.03655	0.000222844	0.00193848
ENSG00000184058	6899	TBX1	22	22q11.21	T-box 1	3496	1.03613	0.00117312	0.00725092
ENSG00000134057	891	CCNB1	5	5q12	cyclin B1	2558	1.0361	0.00015883	0.00148142
ENSG00000111554	56890	MDM1	12	12q15	Mdm1 nuclear protein	6549	1.0349	0.00130378	0.00785955
ENSG00000090971	57106	NAT14	19	19q13.42	N-acetyltransferase 14 (GCN5-related, putative)	2163	1.03441	0.00012145	0.00120621
ENSG00000103253	84264	HAGHL	16	16p13.3	hydroxyacylglutathione hydrolase-like	4890	1.03327	0.0125028	0.0489576
ENSG00000134285	51303	FKBP11	12	12q13.12	FK506 binding protein 11	4957	1.03309	0.000736701	0.00500994
ENSG00000162711	114548	NLRP3	1	1q44	NLR family, pyrin domain containing 3	4757	1.033	0.000406848	0.00311715
ENSG00000104447	7227	TRPS1	8	8q24.12	trichorhinophalangeal syndrome I	11072	1.03251	0.00241756	0.0129985
ENSG00000149269	5058	PAK1	11	11q13-q14	p21 protein (Cdc42/Rac)-activated kinase 1	6299	1.03205	4.04e-06	9.72e-05
ENSG00000261652	145788	C15orf65	15	15q21.3	chromosome 15 open reading frame 65	843	1.0316	0.00109222	0.006839
ENSG00000137563	8836	GGH	8	8q12.3	gamma-glutamyl hydrolase (conjugase, folylpolygammaglutamyl hydrolase)	3130	1.03107	0.000253514	0.00215366
ENSG00000081059	6932	TCF7	5	5q31.1	transcription factor 7 (T-cell specific, HMG-box)	10063	1.03067	0.000810855	0.0054209
ENSG00000108187	64081	PBLD	10	10q21.3	phenazine biosynthesis-like protein domain containing	5172	1.03045	6.09e-05	0.000720382
ENSG00000091490	23231	SEL1L3	4	4p15.2	sel-1 suppressor of lin-12-like 3 (C. elegans)	7489	1.0299	0.000236012	0.00203244
ENSG00000172667	64393	ZMAT3	3	3q26.32	zinc finger, matrin-type 3	9646	1.02854	0.00146126	0.00864588
ENSG00000158373	3017	HIST1H2BD	6	6p21.3	histone cluster 1, H2bd	871	1.02836	0.00151725	0.00890264
ENSG00000179299	79730	NSUN7	4	4p14	NOP2/Sun RNA methyltransferase family member 7	4728	1.02829	0.000839193	0.00556877
ENSG00000175879	3234	HOXD8	2	2q31.1	homeobox D8	2629	1.0282	0.00386214	0.019127
ENSG00000155085	221264	AK9	6	6q21	adenylate kinase 9	10098	1.02705	0.000820338	0.00547341
ENSG00000175792	8607	RUVBL1	3	3q21	RuvB-like AAA ATPase 1	6860	1.02651	2.92e-05	0.000414034
ENSG00000164045	993	CDC25A	3	3p21	cell division cycle 25A	4117	1.02595	0.00116287	0.00719749
ENSG00000141499	55135	WRAP53	17	17p13.1	WD repeat containing, antisense to TP53	5087	1.02531	9.54e-05	0.00101238
ENSG00000159753	146206	RLTPR	16	16q22.1	RGD motif, leucine rich repeats, tropomodulin domain and proline-rich containing	7699	1.02491	0.00185166	0.0104495
ENSG00000124215	60437	CDH26	20	20q13.33	cadherin 26	5748	1.02419	0.00084365	0.00559282
ENSG00000197580	83875	BCO2	11	11q23.1	beta-carotene oxygenase 2	6789	1.02417	0.00412217	0.0202431
ENSG00000104043	79895	ATP8B4	15	15q21.2	ATPase, class I, type 8B, member 4	10861	1.0236	0.00249771	0.0133281
ENSG00000089723	78990	OTUB2	14	14q32.12	OTU deubiquitinase, ubiquitin aldehyde binding 2	4252	1.02352	8.36e-05	0.000916728
ENSG00000147408	55790	CSGALNACT1	8	8p21.3	chondroitin sulfate N-acetylgalactosaminyltransferase 1	6580	1.02294	0.000630174	0.00441376
ENSG00000104723	7991	TUSC3	8	8p22	tumor suppressor candidate 3	5190	1.02289	0.000588212	0.00418447
ENSG00000167552	7846	TUBA1A	12	12q13.12	tubulin alpha 1a	3421	1.02265	0.000428967	0.00325322
ENSG00000082512	7188	TRAF5	1	1q32	TNF receptor associated factor 5	9022	1.02206	0.00690151	0.030663
ENSG00000185437	6450	SH3BGR	21	21q22.3	SH3 domain binding glutamate-rich protein	1495	1.0215	0.000438078	0.00330738
ENSG00000068078	2261	FGFR3	4	4p16.3	fibroblast growth factor receptor 3	4834	1.0212	0.000547448	0.00394462
ENSG00000139865	319089	TTC6	14	14q21.1	tetratricopeptide repeat domain 6	8361	1.01825	0.00610576	0.0276582
ENSG00000020181	25960	ADGRA2	8	8p11.23	adhesion G protein-coupled receptor A2	7061	1.01809	0.00325579	0.0165827
ENSG00000068976	5837	PYGM	11	11q12-q13.2	phosphorylase, glycogen, muscle	4981	1.01731	0.000472769	0.00351398
ENSG00000128805	58504	ARHGAP22	10	10q11.22	Rho GTPase activating protein 22	6783	1.01712	5.86e-05	0.000699123
ENSG00000174175	6403	SELP	1	1q24.2	selectin P	3490	1.01554	0.000786268	0.00528467
ENSG00000173451	83591	THAP2	12	12q21.1	THAP domain containing, apoptosis associated protein 2	6527	1.01431	0.000350401	0.00278147
ENSG00000154839	220134	SKA1	18	18q21.1	spindle and kinetochore associated complex subunit 1	2950	1.01412	0.00095718	0.00617775
ENSG00000187240	79659	DYNC2H1	11	11q21-q22.1	dynein, cytoplasmic 2, heavy chain 1	14284	1.01366	0.00365632	0.0183034
ENSG00000213186	286827	TRIM59	3	3q25.33	tripartite motif containing 59	7865	1.01301	0.0001982	0.00176879
ENSG00000075142	6717	SRI	7	7q21.1	sorcin	4237	1.01037	2.22e-05	0.000338872
ENSG00000189157	100129583	FAM47E	4	4q21.1	family with sequence similarity 47 member E	9508	1.00943	0.00504176	0.0238436
ENSG00000121380	79370	BCL2L14	12	12p13-p12	BCL2-like 14 (apoptosis facilitator)	5112	1.00886	0.000447879	0.00336623
ENSG00000164604	54329	GPR85	7	7q31	G protein-coupled receptor 85	7396	1.00884	0.00020488	0.00182327
ENSG00000122952	11130	ZWINT	10	10q21-q22	ZW10 interacting kinetochore protein	2378	1.00857	0.00101135	0.0064367
ENSG00000128656	1123	CHN1	2	2q31.1	chimerin 1	4971	1.00826	0.00866238	0.036667
ENSG00000115085	7535	ZAP70	2	2q12	zeta chain of T cell receptor associated protein kinase 70kDa	5111	1.00821	0.00421842	0.0206253
ENSG00000153558	25827	FBXL2	3	3p22.3	F-box and leucine-rich repeat protein 2	7664	1.00815	0.00066389	0.00460574
ENSG00000154736	11096	ADAMTS5	21	21q21.3	ADAM metallopeptidase with thrombospondin type 1 motif 5	9056	1.00807	0.0112321	0.0450594
ENSG00000117595	3664	IRF6	1	1q32.3-q41	interferon regulatory factor 6	4915	1.00716	5.56e-05	0.000677064
ENSG00000178980	6415	SEPW1	19	19q13.3	selenoprotein W, 1	5261	1.00685	5.68e-05	0.000685117
ENSG00000118971	894	CCND2	12	12p13	cyclin D2	7157	1.00554	0.00104016	0.00658049
ENSG00000144504	51281	ANKMY1	2	2q37.3	ankyrin repeat and MYND domain containing 1	11477	1.0053	0.00019195	0.00172102
ENSG00000171241	79801	SHCBP1	16	16q11.2	SHC SH2-domain binding protein 1	4459	1.0046	0.00070808	0.00484721
ENSG00000074047	2736	GLI2	2	2q14	GLI family zinc finger 2	7406	1.00242	0.00205167	0.0113539
ENSG00000117091	962	CD48	1	1q21.3-q22	CD48 molecule	3274	1.00118	0.00291831	0.0151452
ENSG00000188897	400499	LOC400499	16	16p13.13	uncharacterized LOC400499	12005	-1.00072	0.00185723	0.0104721
ENSG00000164086	1849	DUSP7	3	3p21	dual specificity phosphatase 7	5648	-1.00113	0.00031275	0.00254579
ENSG00000150893	341640	FREM2	13	13q13.3	FRAS1 related extracellular matrix protein 2	16223	-1.0023	0.0078979	0.0340754
ENSG00000147257	2719	GPC3	X	Xq26.1	glypican 3	2711	-1.00371	0.0031115	0.015975
ENSG00000168878	6439	SFTPB	2	2p12-p11.2	surfactant protein B	4110	-1.00654	0.00458463	0.0221197
ENSG00000164236	651746	ANKRD33B	5	5p15.2	ankyrin repeat domain 33B	9783	-1.00716	0.00448724	0.0217418
ENSG00000112576	896	CCND3	6	6p21	cyclin D3	5802	-1.00838	1.82e-05	0.000297555
ENSG00000203727	389432	SAMD5	6	6q24.3	sterile alpha motif domain containing 5	6320	-1.00918	0.00387581	0.0191664
ENSG00000164823	734	OSGIN2	8	8q21	oxidative stress induced growth inhibitor family member 2	4681	-1.00933	0.00204911	0.0113444
ENSG00000058056	8975	USP13	3	3q26.2-q26.3	ubiquitin specific peptidase 13 (isopeptidase T-3)	8440	-1.00986	0.00118969	0.00731964
ENSG00000132932	51761	ATP8A2	13	13q12	ATPase, aminophospholipid transporter, class I, type 8A, member 2	10415	-1.01012	0.0026298	0.0139277
ENSG00000184227	641371	ACOT1	14	14q24.3	acyl-CoA thioesterase 1	1713	-1.0115	0.000566875	0.00406064
ENSG00000161835	160622	GRASP	12	12q13.13	GRP1 (general receptor for phosphoinositides 1)-associated scaffold protein	2829	-1.01271	0.00354932	0.0178409
ENSG00000187231	91404	SESTD1	2	2q31.2	SEC14 and spectrin domain containing 1	11349	-1.01281	0.00541968	0.0252399
ENSG00000162817	79762	C1orf115	1	1q41	chromosome 1 open reading frame 115	3413	-1.01485	0.00010937	0.00112048
ENSG00000163513	7048	TGFBR2	3	3p22	transforming growth factor beta receptor II	4704	-1.01678	0.000501482	0.00368587
ENSG00000155465	9056	SLC7A7	14	14q11.2	solute carrier family 7 (amino acid transporter light chain, y+L system), member 7	5131	-1.0176	0.000432806	0.00327864
ENSG00000167701	2875	GPT	8	8q24.3	glutamic-pyruvate transaminase (alanine aminotransferase)	2756	-1.01814	0.00357274	0.0179385
ENSG00000125968	3397	ID1	20	20q11	inhibitor of DNA binding 1, dominant negative helix-loop-helix protein	1233	-1.01829	0.000930605	0.00604983
ENSG00000182230	202134	FAM153B	5	5q35.2	family with sequence similarity 153 member B	10769	-1.01852	0.00824026	0.0352918
ENSG00000189420	139735	ZFP92	X	Xq28	ZFP92 zinc finger protein	6105	-1.01911	0.00162115	0.0094014
ENSG00000241399	9936	CD302	2	2q24.2	CD302 molecule	4075	-1.01985	0.000963322	0.00619951
ENSG00000141639	5596	MAPK4	18	18q21.1	mitogen-activated protein kinase 4	7601	-1.02002	0.00124691	0.00758478
ENSG00000157107	115548	FCHO2	5	5q13.2	FCH domain only 2	6127	-1.02178	0.00643813	0.0289019
ENSG00000136732	2995	GYPC	2	2q14-q21	glycophorin C (Gerbich blood group)	3242	-1.02331	0.000107459	0.00110511
ENSG00000151327	283635	FAM177A1	14	14q13.2	family with sequence similarity 177 member A1	8385	-1.02384	8.41e-06	0.000168895
ENSG00000134278	56907	SPIRE1	18	18p11.21	spire-type actin nucleation factor 1	6544	-1.02473	0.00259149	0.0137466
ENSG00000203485	64423	INF2	14	14q32.33	inverted formin, FH2 and WH2 domain containing	9488	-1.02626	7.98e-05	0.000885408
ENSG00000127603	23499	MACF1	1	1p32-p31	microtubule-actin crosslinking factor 1	43102	-1.02643	0.00308099	0.0158608
ENSG00000176485	11145	PLA2G16	11	11q12.3	phospholipase A2 group XVI	3104	-1.02886	0.000159182	0.00148358
ENSG00000090861	16	AARS	16	16q22	alanyl-tRNA synthetase	4498	-1.02916	0.00132526	0.00796404
ENSG00000073464	1183	CLCN4	X	Xp22.3	chloride channel, voltage-sensitive 4	6789	-1.02923	0.000793542	0.00532627
ENSG00000182885	222487	ADGRG3	16	16q21	adhesion G protein-coupled receptor G3	3330	-1.03257	0.00776558	0.0336016
ENSG00000248383	56135	PCDHAC1	5	5q31	protocadherin alpha subfamily C, 1	6943	-1.03307	0.0055451	0.0257347
ENSG00000197859	9719	ADAMTSL2	9	9q34.2	ADAMTS like 2	4677	-1.03308	0.00159083	0.0092656
ENSG00000196498	9612	NCOR2	12	12q24	nuclear receptor corepressor 2	13975	-1.03412	0.00253011	0.0134795
ENSG00000125798	3170	FOXA2	20	20p11	forkhead box A2	2603	-1.03447	0.00122974	0.00750072
ENSG00000137936	8412	BCAR3	1	1p22.1	breast cancer anti-estrogen resistance 3	5042	-1.0346	0.000114675	0.00116045
ENSG00000128294	8459	TPST2	22	22q12.1	tyrosylprotein sulfotransferase 2	6957	-1.03466	2.02e-05	0.000317966
ENSG00000131370	9467	SH3BP5	3	3p24.3	SH3-domain binding protein 5 (BTK-associated)	4159	-1.03507	0.000837636	0.00556119
ENSG00000119698	57718	PPP4R4	14	14q32.2	protein phosphatase 4, regulatory subunit 4	4974	-1.03544	0.00480196	0.0228787
ENSG00000171365	1184	CLCN5	X	Xp11.23-p11.22	chloride channel, voltage-sensitive 5	10619	-1.03565	0.0039645	0.0195762
ENSG00000064652	28966	SNX24	5	5q23.2	sorting nexin 24	3550	-1.03572	0.000481035	0.00356594
ENSG00000149798	10435	CDC42EP2	11	11q13	CDC42 effector protein (Rho GTPase binding) 2	2224	-1.03622	0.0014351	0.0085093
ENSG00000006468	2115	ETV1	7	7p21.3	ets variant 1	9616	-1.03676	0.00208297	0.0115082
ENSG00000156453	5097	PCDH1	5	5q31.3	protocadherin 1	5903	-1.03679	0.000676372	0.00467543
ENSG00000147576	137872	ADHFE1	8	8q13.1	alcohol dehydrogenase, iron containing 1	3750	-1.03684	0.00125923	0.00763901
ENSG00000027697	3459	IFNGR1	6	6q23.3	interferon gamma receptor 1	2571	-1.0391	0.000274316	0.00229268
ENSG00000100167	55964	2021-09-03	22	22q13.2	septin 3	5427	-1.04082	0.00130762	0.00787887
ENSG00000104549	6713	SQLE	8	8q24.1	squalene epoxidase	4305	-1.04122	0.000275016	0.00229567
ENSG00000136869	7099	TLR4	9	9q33.1	toll-like receptor 4	5256	-1.04133	0.00558922	0.0258413
ENSG00000104067	7082	TJP1	15	15q13	tight junction protein 1	11265	-1.04153	0.00130816	0.00787887
ENSG00000103876	2184	FAH	15	15q25.1	fumarylacetoacetate hydrolase (fumarylacetoacetase)	7063	-1.04245	3.01e-05	0.000422451
ENSG00000181444	168544	ZNF467	7	7q36.1	zinc finger protein 467	2734	-1.04433	0.000914747	0.00596696
ENSG00000052344	5652	PRSS8	16	16p11.2	protease, serine 8	3010	-1.04497	0.0102256	0.0418084
ENSG00000129474	84962	AJUBA	14	14q11.2	ajuba LIM protein	5979	-1.04532	0.000437781	0.00330699
ENSG00000102032	5973	RENBP	X	Xq28	renin binding protein	2057	-1.04949	0.00011305	0.00114681
ENSG00000180730	387914	SHISA2	13	13q12.13	shisa family member 2	2860	-1.05022	0.00891293	0.0374678
ENSG00000176435	161198	CLEC14A	14	14q21.1	C-type lectin domain family 14 member A	2267	-1.05047	5.68e-05	0.000685117
ENSG00000146950	357	SHROOM2	X	Xp22.3	shroom family member 2	8191	-1.05191	0.000563687	0.00404211
ENSG00000112303	8875	VNN2	6	6q23-q24	vanin 2	2633	-1.05363	0.0050972	0.0240465
ENSG00000184730	55911	APOBR	16	16p11	apolipoprotein B receptor	3792	-1.05403	0.00420194	0.0205692
ENSG00000069702	7049	TGFBR3	1	1p33-p32	transforming growth factor beta receptor III	8705	-1.05652	0.000575588	0.00410771
ENSG00000176974	6470	SHMT1	17	17p11.2	serine hydroxymethyltransferase 1 (soluble)	7281	-1.05657	0.000110836	0.00113074
ENSG00000164442	10370	CITED2	6	6q23.3	Cbp/p300-interacting transactivator, with Glu/Asp rich carboxy-terminal domain, 2	2535	-1.05688	7.33e-05	0.000825393
ENSG00000185585	169611	OLFML2A	9	9q33.3	olfactomedin like 2A	6746	-1.0574	0.00268202	0.0141652
ENSG00000164715	22853	LMTK2	7	7q21.3	lemur tyrosine kinase 2	9139	-1.05765	0.000981607	0.00628572
ENSG00000165757	57608	KIAA1462	10	10p11.23	KIAA1462	9515	-1.05809	0.0031842	0.0162798
ENSG00000137757	838	CASP5	11	11q22.2-q22.3	caspase 5	1592	-1.05956	0.00840799	0.0357932
ENSG00000157927	55698	RADIL	7	7p22.1	Ras association and DIL domains	6516	-1.06106	0.000791218	0.00531342
ENSG00000168255	548644	POLR2J3	7	7q22.1	polymerase (RNA) II (DNA directed) polypeptide J3	8814	-1.0619	0.0111915	0.0449364
ENSG00000102854	10232	MSLN	16	16p13.3	mesothelin	2642	-1.0632	0.0077574	0.0335771
ENSG00000105971	858	CAV2	7	7q31.1	caveolin 2	6926	-1.06443	0.000300832	0.00247219
ENSG00000071282	29995	LMCD1	3	3p26-p24	LIM and cysteine-rich domains 1	9130	-1.06607	0.00059093	0.00419935
ENSG00000134115	27255	CNTN6	3	3p26.3	contactin 6	5589	-1.06617	0.0115991	0.0462689
ENSG00000121068	6909	TBX2	17	17q23.2	T-box 2	6029	-1.06818	0.000556677	0.00399825
ENSG00000132170	5468	PPARG	3	3p25	peroxisome proliferator-activated receptor gamma	4046	-1.06862	0.000598707	0.00424563
ENSG00000240184	5098	PCDHGC3	5	5q31	protocadherin gamma subfamily C, 3	5432	-1.06971	0.00911291	0.0381057
ENSG00000163421	60675	PROK2	3	3p13	prokineticin 2	1612	-1.07056	0.00928421	0.0386535
ENSG00000197905	7004	TEAD4	12	12p13.3-p13.2	TEA domain family member 4	2272	-1.07077	0.000349813	0.00277844
ENSG00000151364	65987	KCTD14	11	11q14.1	potassium channel tetramerization domain containing 14	1917	-1.0713	0.000239735	0.00205566
ENSG00000106771	23731	TMEM245	9	9q31	transmembrane protein 245	9484	-1.07228	0.000317505	0.00257047
ENSG00000162614	91624	NEXN	1	1p31.1	nexilin (F actin binding protein)	4436	-1.07237	0.00444888	0.0215792
ENSG00000132970	10810	WASF3	13	13q12	WAS protein family member 3	5162	-1.07302	0.00156774	0.00915096
ENSG00000106004	3202	HOXA5	7	7p15.2	homeobox A5	1707	-1.07322	0.000216802	0.00190194
ENSG00000170561	153572	IRX2	5	5p15.33	iroquois homeobox 2	3384	-1.07487	0.000167411	0.00154112
ENSG00000157510	134265	AFAP1L1	5	5q32	actin filament associated protein 1 like 1	4721	-1.07574	0.000629284	0.00441123
ENSG00000087076	51171	HSD17B14	19	19q13.33	hydroxysteroid (17-beta) dehydrogenase 14	1281	-1.07681	0.000311157	0.00253435
ENSG00000006704	9569	GTF2IRD1	7	7q11.23	GTF2I repeat domain containing 1	6498	-1.0774	0.00168118	0.00966606
ENSG00000087116	9509	ADAMTS2	5	5qter	ADAM metallopeptidase with thrombospondin type 1 motif 2	7687	-1.07989	0.0030074	0.0155415
ENSG00000134830	27202	C5AR2	19	19q13.33	complement component 5a receptor 2	6802	-1.08209	0.000281584	0.00233822
ENSG00000079691	55604	LRRC16A	6	6p22.2	leucine rich repeat containing 16A	6799	-1.0837	0.000680142	0.00469665
ENSG00000158164	11013	TMSB15A	X	Xq21.33-q22.3	thymosin beta 15a	685	-1.08374	0.00221398	0.0121223
ENSG00000196502	6817	SULT1A1	16	16p12.1	sulfotransferase family 1A member 1	8909	-1.08439	0.000981866	0.00628572
ENSG00000163239	126668	TDRD10	1	1q21.3	tudor domain containing 10	2706	-1.08529	0.000420939	0.00320864
ENSG00000039523	79567	FAM65A	16	16q22.1	family with sequence similarity 65 member A	6729	-1.0861	0.00133921	0.00802628
ENSG00000138641	8916	HERC3	4	4q21	HECT and RLD domain containing E3 ubiquitin protein ligase 3	8634	-1.08739	0.000423726	0.00322075
ENSG00000140600	6457	SH3GL3	15	15q24	SH3-domain GRB2-like 3	3363	-1.0885	0.00147666	0.00872163
ENSG00000109501	7466	WFS1	4	4p16.1	Wolfram syndrome 1 (wolframin)	4513	-1.08852	0.000139731	0.00134726
ENSG00000124406	10396	ATP8A1	4	4p13	ATPase, aminophospholipid transporter (APLT), class I, type 8A, member 1	11199	-1.08952	0.00449881	0.0217821
ENSG00000181873	200205	IBA57	1	1q42.13	IBA57 homolog, iron-sulfur cluster assembly	10219	-1.09333	9.02e-05	0.000970003
ENSG00000000938	2268	FGR	1	1p36.2-p36.1	FGR proto-oncogene, Src family tyrosine kinase	3474	-1.09406	0.00015563	0.00145969
ENSG00000163072	115677	NOSTRIN	2	2q31.1	nitric oxide synthase trafficking	5248	-1.09431	0.00102699	0.00650947
ENSG00000132688	10763	NES	1	1q23.1	nestin	5558	-1.09529	0.00400021	0.0197018
ENSG00000173369	713	C1QB	1	1p36.12	complement component 1, q subcomponent, B chain	1601	-1.09635	0.00161867	0.00939106
ENSG00000143418	29956	CERS2	1	1q21.3	ceramide synthase 2	4644	-1.09815	5.72e-06	0.000125841
ENSG00000245848	1050	CEBPA	19	19q13.1	CCAAT/enhancer binding protein (C/EBP), alpha	2631	-1.09826	0.000207852	0.00183661
ENSG00000275410	6928	HNF1B	17	17q12	HNF1 homeobox B	5962	-1.09934	0.00159917	0.00930607
ENSG00000134571	4607	MYBPC3	11	11p11.2	myosin binding protein C, cardiac	4280	-1.09945	0.00474757	0.0227001
ENSG00000174669	3177	SLC29A2	11	11q13	solute carrier family 29 (equilibrative nucleoside transporter), member 2	2720	-1.0999	0.000980473	0.00628428
ENSG00000197879	4641	MYO1C	17	17p13.3	myosin IC	8152	-1.10327	1.77e-05	0.000292805
ENSG00000235169	388588	SMIM1	1	1p36.32	small integral membrane protein 1 (Vel blood group)	954	-1.10353	0.000162114	0.00150266
ENSG00000073350	3993	LLGL2	17	17q25.1	lethal giant larvae homolog 2 (Drosophila)	7909	-1.10421	0.000394288	0.00304349
ENSG00000130307	83878	USHBP1	19	19p13	Usher syndrome 1C binding protein 1	5175	-1.10949	0.000391978	0.0030274
ENSG00000130940	54897	CASZ1	1	1p36.22	castor zinc finger 1	11336	-1.11374	0.000188465	0.00169316
ENSG00000139438	84915	FAM222A	12	12q24.11	family with sequence similarity 222 member A	3722	-1.12066	0.00304046	0.0157003
ENSG00000130052	9754	STARD8	X	Xq13.1	StAR related lipid transfer domain containing 8	5558	-1.12155	0.000391977	0.0030274
ENSG00000197165	6799	SULT1A2	16	16p12.1	sulfotransferase family 1A member 2	2275	-1.12175	0.00279685	0.0146591
ENSG00000122778	57670	KIAA1549	7	7q34	KIAA1549	12427	-1.12253	0.00150925	0.00887319
ENSG00000131069	55902	ACSS2	20	20q11.22	acyl-CoA synthetase short-chain family member 2	5385	-1.12687	3.82e-05	0.000503952
ENSG00000131773	10656	KHDRBS3	8	8q24.2	KH domain containing, RNA binding, signal transduction associated 3	8645	-1.12821	0.000181083	0.00163779
ENSG00000067064	3422	IDI1	10	10p15.3	isopentenyl-diphosphate delta isomerase 1	3589	-1.12863	0.000386649	0.00300156
ENSG00000168685	3575	IL7R	5	5p13	interleukin 7 receptor	6060	-1.13055	0.0074327	0.0325069
ENSG00000099875	2872	MKNK2	19	19p13.3	MAP kinase interacting serine/threonine kinase 2	5221	-1.13081	0.000134974	0.0013127
ENSG00000147804	55630	SLC39A4	8	8q24.3	solute carrier family 39 (zinc transporter), member 4	5033	-1.13109	8.07e-05	0.000893078
ENSG00000111666	56994	CHPT1	12	12q	choline phosphotransferase 1	6004	-1.13117	0.00032871	0.00263576
ENSG00000123143	5585	PKN1	19	19p13.12	protein kinase N1	4606	-1.13155	4.61e-05	0.000585521
ENSG00000155962	1193	CLIC2	X	Xq28	chloride intracellular channel 2	2840	-1.1332	0.000249621	0.00212867
ENSG00000134917	11095	ADAMTS8	11	11q25	ADAM metallopeptidase with thrombospondin type 1 motif 8	4523	-1.13554	0.000205131	0.00182327
ENSG00000087589	57091	CASS4	20	20q13.31	Cas scaffolding protein family member 4	5069	-1.13909	0.00035587	0.00280669
ENSG00000134243	6272	SORT1	1	1p13.3|1p21.3-p13.1	sortilin 1	9160	-1.13946	7.69e-06	0.000158167
ENSG00000198113	54863	TOR4A	9	9q34.3	torsin family 4, member A	4148	-1.1398	1.34e-05	0.000237132
ENSG00000168067	5871	MAP4K2	11	11q13	mitogen-activated protein kinase kinase kinase kinase 2	7649	-1.14006	0.000128817	0.00126513
ENSG00000097096	84144	SYDE2	1	1p22.3	synapse defective 1, Rho GTPase, homolog 2 (C. elegans)	6451	-1.14266	0.00277409	0.0145656
ENSG00000171747	3960	LGALS4	19	19q13.2	lectin, galactoside-binding, soluble, 4	2645	-1.14397	0.00519583	0.0243975
ENSG00000171873	146	ADRA1D	20	20p13	adrenoceptor alpha 1D	2790	-1.14483	0.00122825	0.00749508
ENSG00000081052	1286	COL4A4	2	2q35-q37	collagen, type IV, alpha 4	9895	-1.14619	0.00883824	0.037212
ENSG00000110328	374378	GALNT18	11	11p15.3	polypeptide N-acetylgalactosaminyltransferase 18	3627	-1.14659	5.76e-06	0.000126394
ENSG00000173166	65059	RAPH1	2	2q33	Ras association (RalGDS/AF-6) and pleckstrin homology domains 1	11697	-1.1468	0.000419795	0.00320174
ENSG00000154153	54463	FAM134B	5	5p15.1	family with sequence similarity 134 member B	4568	-1.14688	0.000322687	0.00260457
ENSG00000110841	8496	PPFIBP1	12	12p12.1	PTPRF interacting protein, binding protein 1 (liprin beta 1)	11690	-1.14753	0.0005302	0.0038451
ENSG00000141298	85464	SSH2	17	17q11.2	slingshot protein phosphatase 2	12608	-1.14982	0.000782404	0.00526535
ENSG00000135049	23287	AGTPBP1	9	9q21.33	ATP/GTP binding protein 1	4939	-1.15041	0.00254062	0.0135248
ENSG00000100312	49	ACR	22	22q13.33	acrosin	2059	-1.15127	0.00640455	0.028798
ENSG00000111077	23371	TNS2	12	12q13.13	tensin 2	8093	-1.15199	0.000959281	0.00618403
ENSG00000164713	25798	BRI3	7	7q21.3	brain protein I3	5139	-1.15256	6.3e-05	0.000734533
ENSG00000113594	3977	LIFR	5	5p13-p12	leukemia inhibitory factor receptor alpha	11864	-1.15282	0.00901043	0.0377594
ENSG00000188959	401546	C9orf152	9	9q31.3	chromosome 9 open reading frame 152	2947	-1.153	0.000622121	0.00437014
ENSG00000085831	22996	TTC39A	1	1p32.3	tetratricopeptide repeat domain 39A	9362	-1.15304	4.71e-06	0.000109711
ENSG00000181019	1728	NQO1	16	16q22.1	NAD(P)H dehydrogenase, quinone 1	3254	-1.15452	0.000180672	0.00163628
ENSG00000122025	2322	FLT3	13	13q12	fms-related tyrosine kinase 3	4159	-1.15929	0.00314773	0.0161302
ENSG00000180871	3579	CXCR2	2	2q35	chemokine (C-X-C motif) receptor 2	3231	-1.15997	0.00718433	0.0316993
ENSG00000138741	7222	TRPC3	4	4q27	transient receptor potential cation channel, subfamily C, member 3	4358	-1.16058	0.00879961	0.0371047
ENSG00000060982	586	BCAT1	12	12p12.1	branched chain amino-acid transaminase 1, cytosolic	11775	-1.16097	0.00086802	0.0057173
ENSG00000179921	151306	GPBAR1	2	2q35	G protein-coupled bile acid receptor 1	2692	-1.1615	0.00116428	0.0072029
ENSG00000168003	6520	SLC3A2	11	11q13	solute carrier family 3 (amino acid transporter heavy chain), member 2	5178	-1.16199	0.000293125	0.00242274
ENSG00000251322	85358	SHANK3	22	22q13.3	SH3 and multiple ankyrin repeat domains 3	7455	-1.16243	0.00206944	0.0114428
ENSG00000162367	6886	TAL1	1	1p32	T-cell acute lymphocytic leukemia 1	5700	-1.16263	0.000406357	0.00311517
ENSG00000166510	80323	CCDC68	18	18q21	coiled-coil domain containing 68	5180	-1.17275	0.00725171	0.0318919
ENSG00000119711	4329	ALDH6A1	14	14q24.3	aldehyde dehydrogenase 6 family member A1	6680	-1.17319	6.71e-05	0.000769555
ENSG00000003436	7035	TFPI	2	2q32	tissue factor pathway inhibitor	11714	-1.17326	9.05e-05	0.0009719
ENSG00000099769	3483	IGFALS	16	16p13.3	insulin like growth factor binding protein acid labile subunit	2363	-1.17445	0.00621387	0.0280722
ENSG00000135114	8638	OASL	12	12q24.2	2'-5'-oligoadenylate synthetase-like	3517	-1.18035	0.00830523	0.0355123
ENSG00000167711	5345	SERPINF2	17	17p13	serpin peptidase inhibitor, clade F (alpha-2 antiplasmin, pigment epithelium derived factor), member 2	2348	-1.18111	0.000872998	0.00573922
ENSG00000128849	84952	CGNL1	15	15q21.3	cingulin-like 1	8663	-1.18176	0.000648945	0.00451605
ENSG00000183378	341277	OVCH2	11	11p15.4	ovochymase 2 (gene/pseudogene)	2088	-1.18512	0.00682338	0.030356
ENSG00000130164	3949	LDLR	19	19p13.2	low density lipoprotein receptor	7718	-1.18609	0.0034775	0.0175258
ENSG00000133135	79589	RNF128	X	Xq22.3	ring finger protein 128, E3 ubiquitin protein ligase	3432	-1.18642	0.0010747	0.00675132
ENSG00000128309	4357	MPST	22	22q13.1	mercaptopyruvate sulfurtransferase	6760	-1.18861	3.15e-06	7.84e-05
ENSG00000143367	7286	TUFT1	1	1q21	tuftelin 1	3878	-1.18889	0.000783901	0.00527219
ENSG00000146938	57502	NLGN4X	X	Xp22.33	neuroligin 4, X-linked	7441	-1.19046	0.00382318	0.018983
ENSG00000135048	23670	TMEM2	9	9q21.13	transmembrane protein 2	9625	-1.19052	0.0021125	0.011633
ENSG00000123094	11228	RASSF8	12	12p12.3	Ras association (RalGDS/AF-6) domain family (N-terminal) member 8	7619	-1.19252	0.00179495	0.0101764
ENSG00000198722	10497	UNC13B	9	9p13.3	unc-13 homolog B (C. elegans)	6940	-1.1941	3.47e-05	0.000467519
ENSG00000064042	22998	LIMCH1	4	4p13	LIM and calponin homology domains 1	10862	-1.19772	9.59e-05	0.00101551
ENSG00000145990	54438	GFOD1	6	6pter-p22.1	glucose-fructose oxidoreductase domain containing 1	10686	-1.20046	0.000571027	0.00408602
ENSG00000133687	83857	TMTC1	12	12p11.22	transmembrane and tetratricopeptide repeat containing 1	14636	-1.20152	0.00526101	0.0246581
ENSG00000140945	1012	CDH13	16	16q23.3	cadherin 13	11217	-1.20348	0.00195462	0.010911
ENSG00000189120	80320	SP6	17	17q21.32	Sp6 transcription factor	4075	-1.20676	0.00227674	0.0123851
ENSG00000115306	6711	SPTBN1	2	2p21	spectrin, beta, non-erythrocytic 1	18504	-1.20753	0.0010382	0.0065712
ENSG00000108622	3384	ICAM2	17	17q23.3	intercellular adhesion molecule 2	3243	-1.21015	5.8e-05	0.000696585
ENSG00000111961	23328	SASH1	6	6q24.3	SAM and SH3 domain containing 1	9476	-1.2104	0.0010722	0.00673877
ENSG00000198075	27233	SULT1C4	2	2q12.3	sulfotransferase family 1C member 4	2898	-1.21104	0.010706	0.0433502
ENSG00000119280	84886	C1orf198	1	1q42.2	chromosome 1 open reading frame 198	5161	-1.21201	2.85e-06	7.3e-05
ENSG00000124839	64284	RAB17	2	2q37.3	RAB17, member RAS oncogene family	4783	-1.21299	0.000217674	0.00190709
ENSG00000136153	4008	LMO7	13	13q22.2	LIM domain 7	14367	-1.21311	0.000696497	0.00478254
ENSG00000187699	84281	C2orf88	2	2q32.2	chromosome 2 open reading frame 88	5997	-1.2143	0.000451042	0.00338571
ENSG00000189430	9437	NCR1	19	19q13.42	natural cytotoxicity triggering receptor 1	1893	-1.21613	0.0113406	0.0453995
ENSG00000145555	4651	MYO10	5	5p15.1	myosin X	13963	-1.21654	6.28e-05	0.000733795
ENSG00000124171	84612	PARD6B	20	20q13.13	par-6 family cell polarity regulator beta	4726	-1.21677	0.00241981	0.0130002
ENSG00000160801	5745	PTH1R	3	3p22-p21.1	parathyroid hormone 1 receptor	2758	-1.21801	0.000397939	0.00306331
ENSG00000128965	79094	CHAC1	15	15q15.1	ChaC glutathione-specific gamma-glutamylcyclotransferase 1	2058	-1.21839	0.00334641	0.0169862
ENSG00000187678	81848	SPRY4	5	5q31.3	sprouty RTK signaling antagonist 4	5930	-1.21877	0.000793924	0.00532627
ENSG00000114279	2257	FGF12	3	3q28	fibroblast growth factor 12	7355	-1.22064	0.0123458	0.0484843
ENSG00000113739	8614	STC2	5	5q35.1	stanniocalcin 2	6128	-1.22262	0.00155797	0.0091045
ENSG00000174804	8322	FZD4	11	11q14.2	frizzled class receptor 4	7383	-1.22324	0.00064535	0.00450036
ENSG00000100242	25777	SUN2	22	22q13.1	Sad1 and UNC84 domain containing 2	6489	-1.22336	0.000100124	0.00104896
ENSG00000123178	57213	SPRYD7	13	13q14	SPRY domain containing 7	3340	-1.22376	2.6e-06	6.84e-05
ENSG00000154146	4900	NRGN	11	11q24	neurogranin	1309	-1.22398	0.00102784	0.00651173
ENSG00000196408	124056	NOXO1	16	16p13.3	NADPH oxidase organizer 1	2159	-1.22422	1.95e-05	0.000311921
ENSG00000184454	400746	NCMAP	1	1p36.11	non-compact myelin associated protein	4122	-1.22647	0.000971844	0.00624537
ENSG00000170989	1901	S1PR1	1	1p21	sphingosine-1-phosphate receptor 1	3071	-1.22839	0.000748198	0.00507527
ENSG00000076826	57662	CAMSAP3	19	19p13.2	calmodulin regulated spectrin associated protein family member 3	4845	-1.23105	0.00118726	0.00730894
ENSG00000073008	5817	PVR	19	19q13.2	poliovirus receptor	3519	-1.23383	0.000188436	0.00169316
ENSG00000179256	440087	SMCO3	12	12p12.3	single-pass membrane protein with coiled-coil domains 3	2104	-1.23533	0.00336721	0.017066
ENSG00000133121	90627	STARD13	13	13q13.1	StAR related lipid transfer domain containing 13	8388	-1.23553	0.00012349	0.00122225
ENSG00000164741	10395	DLC1	8	8p22	DLC1 Rho GTPase activating protein	12794	-1.23563	0.000462378	0.00345395
ENSG00000171451	92126	DSEL	18	18q22.1	dermatan sulfate epimerase-like	9531	-1.23569	0.000107347	0.00110511
ENSG00000043591	153	ADRB1	10	10q25.3	adrenoceptor beta 1	2853	-1.23632	0.00258223	0.0137137
ENSG00000030304	4593	MUSK	9	9q31.3-q32	muscle, skeletal, receptor tyrosine kinase	4246	-1.2391	0.00174353	0.0099268
ENSG00000124126	57580	PREX1	20	20q13.13	phosphatidylinositol-3,4,5-trisphosphate-dependent Rac exchange factor 1	7393	-1.2402	0.000359202	0.00282793
ENSG00000117594	3290	HSD11B1	1	1q32-q41	hydroxysteroid (11-beta) dehydrogenase 1	1513	-1.24396	0.000212997	0.00187468
ENSG00000169255	8706	B3GALNT1	3	3q25	beta-1,3-N-acetylgalactosaminyltransferase 1 (globoside blood group)	4183	-1.2451	0.000183559	0.00165684
ENSG00000142405	91662	NLRP12	19	19q13.42	NLR family, pyrin domain containing 12	5088	-1.24729	0.000516456	0.00376167
ENSG00000143028	284612	SYPL2	1	1p13.3	synaptophysin-like 2	3963	-1.24779	0.00928263	0.0386535
ENSG00000138434	6744	SSFA2	2	2q31.3	sperm specific antigen 2	9582	-1.24836	0.000902795	0.00589759
ENSG00000167508	4597	MVD	16	16q24.3	mevalonate diphosphate decarboxylase	4717	-1.24866	8.91e-06	0.000175568
ENSG00000128242	9514	GAL3ST1	22	22q12.2	galactose-3-O-sulfotransferase 1	3017	-1.2491	9.22e-05	0.000984131
ENSG00000147883	1030	CDKN2B	9	9p21	cyclin-dependent kinase inhibitor 2B (p15, inhibits CDK4)	4058	-1.25048	0.0016746	0.00964062
ENSG00000138356	316	AOX1	2	2q33	aldehyde oxidase 1	5556	-1.25107	0.00328383	0.0167128
ENSG00000018280	6556	SLC11A1	2	2q35	solute carrier family 11 (proton-coupled divalent metal ion transporter), member 1	8676	-1.25192	0.00022024	0.00192331
ENSG00000079805	1785	DNM2	19	19p13.2	dynamin 2	13443	-1.25234	5.93e-06	0.00012913
ENSG00000155846	133522	PPARGC1B	5	5q32	peroxisome proliferator-activated receptor gamma, coactivator 1 beta	12889	-1.2535	0.000239136	0.00205229
ENSG00000070778	11099	PTPN21	14	14q31.3	protein tyrosine phosphatase, non-receptor type 21	7396	-1.25389	0.00018615	0.00167684
ENSG00000143674	84451	KIAA1804	1	1q42	mixed lineage kinase 4	7916	-1.25404	0.000847547	0.00561035
ENSG00000154065	147463	ANKRD29	18	18q11.2	ankyrin repeat domain 29	6391	-1.25438	0.000524181	0.00380721
ENSG00000140092	10516	FBLN5	14	14q32.1	fibulin 5	4973	-1.25465	0.000224581	0.0019498
ENSG00000154133	54538	ROBO4	11	11q24.2	roundabout guidance receptor 4	7033	-1.25689	0.00100124	0.0063824
ENSG00000139517	222484	LNX2	13	13q12.2	ligand of numb-protein X 2	4627	-1.25727	0.000125908	0.00124435
ENSG00000163220	6280	S100A9	1	1q21	S100 calcium binding protein A9	577	-1.25913	0.00108215	0.00678544
ENSG00000198948	9848	MFAP3L	4	4q32.3	microfibrillar associated protein 3 like	8741	-1.26188	0.00119727	0.00735952
ENSG00000163393	55356	SLC22A15	1	1p13.1	solute carrier family 22 member 15	5292	-1.26483	0.00465876	0.0223471
ENSG00000024422	30846	EHD2	19	19q13.3	EH domain containing 2	3923	-1.26485	0.000120314	0.00119965
ENSG00000178343	152573	SHISA3	4	4p13	shisa family member 3	1971	-1.26582	0.00416085	0.0204181
ENSG00000179776	1003	CDH5	16	16q22.1	cadherin 5, type 2 (vascular endothelium)	5972	-1.26704	0.00143644	0.00851029
ENSG00000099994	56241	SUSD2	22	22q11-q12	sushi domain containing 2	5279	-1.26711	0.00116947	0.00723165
ENSG00000156414	122402	TDRD9	14	14q32.33	tudor domain containing 9	5480	-1.26722	0.0071184	0.0314705
ENSG00000155659	11326	VSIG4	X	Xq12-q13.3	V-set and immunoglobulin domain containing 4	2192	-1.26846	0.000684587	0.00471765
ENSG00000197381	104	ADARB1	21	21q22.3	adenosine deaminase, RNA-specific, B1	10049	-1.27042	0.000171586	0.00157202
ENSG00000214456	440503	PLIN5	19	19p13.3	perilipin 5	4815	-1.2741	5e-05	0.000624358
ENSG00000046653	2824	GPM6B	X	Xp22.2	glycoprotein M6B	5675	-1.27459	0.000272917	0.00228383
ENSG00000176834	54621	VSIG10	12	12q24.23	V-set and immunoglobulin domain containing 10	8350	-1.27634	2.33e-05	0.000349966
ENSG00000111859	4739	NEDD9	6	6p24.2	neural precursor cell expressed, developmentally down-regulated 9	10359	-1.27698	1.39e-05	0.000245624
ENSG00000185483	4919	ROR1	1	1p31.3	receptor tyrosine kinase-like orphan receptor 1	6715	-1.27727	0.000466853	0.0034777
ENSG00000143167	10223	GPA33	1	1q24.1	glycoprotein A33 (transmembrane)	3200	-1.27738	0.00765641	0.0332042
ENSG00000129250	10749	KIF1C	17	17p13.2	kinesin family member 1C	8580	-1.27777	3.23e-06	7.99e-05
ENSG00000137486	408	ARRB1	11	11q13	arrestin, beta 1	5828	-1.27987	2.04e-06	5.76e-05
ENSG00000162174	80150	ASRGL1	11	11q12.3	asparaginase like 1	4586	-1.28085	8.83e-05	0.000953097
ENSG00000148426	254427	PROSER2	10	10p14	proline and serine rich 2	3663	-1.28119	2.46e-06	6.62e-05
ENSG00000122852	653509	SFTPA1	10	10q22.3	surfactant protein A1	2451	-1.2814	0.00945653	0.0391404
ENSG00000112137	221692	PHACTR1	6	6p24.1	phosphatase and actin regulator 1	11200	-1.2827	0.000221387	0.00192956
ENSG00000127946	3092	HIP1	7	7q11.23	huntingtin interacting protein 1	8953	-1.28274	0.000205662	0.00182327
ENSG00000132702	60484	HAPLN2	1	1q23.1	hyaluronan and proteoglycan link protein 2	2241	-1.28302	0.0038325	0.0190223
ENSG00000138798	1950	EGF	4	4q25	epidermal growth factor	6127	-1.28387	0.00105395	0.00665205
ENSG00000186994	256949	KANK3	19	19p13.2	KN motif and ankyrin repeat domains 3	3594	-1.28641	9.96e-05	0.00104476
ENSG00000047644	55841	WWC3	X	Xp22.32	WWC family member 3	7114	-1.28655	4.79e-06	0.000110822
ENSG00000148483	653567	TMEM236	10	10p12.33	transmembrane protein 236	5464	-1.287	0.00175562	0.00999138
ENSG00000161640	114132	SIGLEC11	19	19q13.33	sialic acid binding Ig-like lectin 11	3173	-1.29047	0.00173409	0.00987726
ENSG00000171611	171558	PTCRA	6	6p21.3	pre T-cell antigen receptor alpha	1168	-1.29051	0.000950938	0.00614632
ENSG00000182118	375061	FAM89A	1	1q42.2	family with sequence similarity 89 member A	2394	-1.29283	4.9e-05	0.000615652
ENSG00000104059	23359	FAM189A1	15	15q13.1	family with sequence similarity 189 member A1	5545	-1.29423	0.00142136	0.0084433
ENSG00000151726	2180	ACSL1	4	4q35.1	acyl-CoA synthetase long-chain family member 1	6284	-1.29572	0.00011182	0.00113864
ENSG00000147206	56000	NXF3	X	Xq22	nuclear RNA export factor 3	3526	-1.29742	0.00513566	0.0241686
ENSG00000122679	10268	RAMP3	7	7p13-p12	receptor (G protein-coupled) activity modifying protein 3	1427	-1.29822	0.000600589	0.00425449
ENSG00000186188	338557	FFAR4	10	10q23.33	free fatty acid receptor 4	4060	-1.30149	0.0062264	0.0281004
ENSG00000174885	171389	NLRP6	11	11p15	NLR family, pyrin domain containing 6	3207	-1.30407	0.00104532	0.0066069
ENSG00000137507	2615	LRRC32	11	11q13.5-q14	leucine rich repeat containing 32	4459	-1.30507	0.000383739	0.00298264
ENSG00000253313	149466	C1orf210	1	1p34.2	chromosome 1 open reading frame 210	1516	-1.30756	6.37e-05	0.000740096
ENSG00000204403	100506742	CASP12	11	11q22.3	caspase 12 (gene/pseudogene)	1786	-1.30858	0.000500263	0.00367965
ENSG00000164879	761	CA3	8	8q21.2	carbonic anhydrase III	2310	-1.3096	0.00906051	0.0379102
ENSG00000116962	4811	NID1	1	1q43	nidogen 1	5864	-1.3101	0.00117877	0.00728245
ENSG00000031081	57514	ARHGAP31	3	3q13.33	Rho GTPase activating protein 31	9384	-1.31016	8.72e-05	0.000946226
ENSG00000125966	10893	MMP24	20	20q11.2	matrix metallopeptidase 24	4414	-1.31319	0.000696007	0.00478162
ENSG00000118898	5493	PPL	16	16p13.3	periplakin	7686	-1.31403	0.000113693	0.00115246
ENSG00000166278	717	C2	6	6p21.3	complement component 2	5536	-1.31446	3.22e-05	0.000445269
ENSG00000169291	126669	SHE	1	1q21.3	Src homology 2 domain containing E	8441	-1.31561	1.97e-05	0.00031248
ENSG00000106780	1955	MEGF9	9	9q32-q33.3	multiple EGF-like-domains 9	6298	-1.3173	5.85e-05	0.000699123
ENSG00000233608	117581	TWIST2	2	2q37.3	twist family bHLH transcription factor 2	1878	-1.31802	0.000669595	0.00463335
ENSG00000149485	3992	FADS1	11	11q12.2-q13.1	fatty acid desaturase 1	10230	-1.32032	0.000141556	0.0013629
ENSG00000090776	1947	EFNB1	X	Xq12	ephrin-B1	3314	-1.32846	5.01e-06	0.000114106
ENSG00000078070	56922	MCCC1	3	3q27	methylcrotonoyl-CoA carboxylase 1	4321	-1.33077	2.72e-05	0.000392762
ENSG00000261371	5175	PECAM1	17	17q23.3	platelet/endothelial cell adhesion molecule 1	7759	-1.33107	3.46e-05	0.000467519
ENSG00000110090	1374	CPT1A	11	11q13.2	carnitine palmitoyltransferase 1A (liver)	6565	-1.33348	0.000617441	0.00434636
ENSG00000069122	221395	ADGRF5	6	6p12.3	adhesion G protein-coupled receptor F5	6650	-1.33676	1.17e-05	0.000216481
ENSG00000076864	5909	RAP1GAP	1	1p36.1-p35	RAP1 GTPase activating protein	5755	-1.33807	0.000250263	0.00213144
ENSG00000068001	8692	HYAL2	3	3p21.3	hyaluronoglucosaminidase 2	4545	-1.34036	7.04e-06	0.000148328
ENSG00000145911	23138	N4BP3	5	5q35.3	NEDD4 binding protein 3	6080	-1.34089	0.000471113	0.00350361
ENSG00000143554	11000	SLC27A3	1	1q21.3	solute carrier family 27 (fatty acid transporter), member 3	5470	-1.34173	0.000132781	0.00129795
ENSG00000184838	51334	PRR16	5	5q23.1	proline rich 16	2274	-1.34207	5.83e-05	0.000698331
ENSG00000064205	8839	WISP2	20	20q13.12	WNT1 inducible signaling pathway protein 2	4981	-1.34585	0.000495074	0.00365147
ENSG00000092929	201294	UNC13D	17	17q25.1	unc-13 homolog D (C. elegans)	7752	-1.34602	1.85e-05	0.00029875
ENSG00000185561	727910	TLCD2	17	17p13.3	TLC domain containing 2	5971	-1.34628	0.000361837	0.00284243
ENSG00000138669	5593	PRKG2	4	4q13.1-q21.1	protein kinase, cGMP-dependent, type II	5116	-1.3482	0.000225059	0.00195269
ENSG00000142512	89790	SIGLEC10	19	19q13.3	sialic acid binding Ig-like lectin 10	3667	-1.35043	0.000706595	0.0048404
ENSG00000131634	79652	TMEM204	16	16p13.3	transmembrane protein 204	2047	-1.35391	3.95e-05	0.000518973
ENSG00000179044	283849	EXOC3L1	16	16q22.1	exocyst complex component 3-like 1	3077	-1.35418	6.54e-05	0.000754632
ENSG00000113161	3156	HMGCR	5	5q13.3-q14	3-hydroxy-3-methylglutaryl-CoA reductase	6215	-1.35483	1.98e-05	0.00031395
ENSG00000101955	8406	SRPX	X	Xp21.1	sushi-repeat containing protein, X-linked	1987	-1.35561	9.78e-05	0.00102983
ENSG00000082438	22837	COBLL1	2	2q24.3	cordon-bleu WH2 repeat protein like 1	17178	-1.35611	0.000531557	0.00385059
ENSG00000131471	8639	AOC3	17	17q21	amine oxidase, copper containing 3	4524	-1.35759	0.000505304	0.00370253
ENSG00000178814	26873	OPLAH	8	8q24.3	5-oxoprolinase (ATP-hydrolysing)	4319	-1.35933	0.000116144	0.00117024
ENSG00000164120	3248	HPGD	4	4q34-q35	hydroxyprostaglandin dehydrogenase 15-(NAD)	5529	-1.36295	0.00570045	0.0262197
ENSG00000136237	9771	RAPGEF5	7	7p15.3	Rap guanine nucleotide exchange factor 5	10245	-1.36565	0.00111417	0.00694728
ENSG00000151012	23657	SLC7A11	4	4q28.3	solute carrier family 7 (anionic amino acid transporter light chain, xc- system), member 11	9645	-1.36573	0.000481087	0.00356594
ENSG00000162551	249	ALPL	1	1p36.12	alkaline phosphatase, liver/bone/kidney	3007	-1.36809	0.000610461	0.00430625
ENSG00000133116	9365	KL	13	13q12	klotho	5056	-1.37142	0.000884455	0.00580035
ENSG00000005187	6296	ACSM3	16	16p13.11	acyl-CoA synthetase medium-chain family member 3	7822	-1.37258	8.18e-05	0.000902089
ENSG00000147872	123	PLIN2	9	9p22.1	perilipin 2	5086	-1.37401	0.000800562	0.00536277
ENSG00000134853	5156	PDGFRA	4	4q12	platelet-derived growth factor receptor, alpha polypeptide	9732	-1.37761	0.000107383	0.00110511
ENSG00000076067	5939	RBMS2	12	12q13.3	RNA binding motif, single stranded interacting protein 2	8805	-1.38301	2.25e-06	6.23e-05
ENSG00000178826	135932	TMEM139	7	7q34	transmembrane protein 139	2564	-1.38445	0.000115144	0.00116366
ENSG00000174567	127845	GOLT1A	1	1q32.1	golgi transport 1A	1136	-1.39336	0.000546806	0.00394211
ENSG00000006831	79602	ADIPOR2	12	12p13.31	adiponectin receptor 2	5878	-1.39452	1.63e-06	4.9e-05
ENSG00000179348	2624	GATA2	3	3q21.3	GATA binding protein 2	4459	-1.3953	0.000380705	0.00296248
ENSG00000166816	197257	LDHD	16	16q23.1	lactate dehydrogenase D	2359	-1.39577	2.13e-07	1.18e-05
ENSG00000131015	80328	ULBP2	6	6q25	UL16 binding protein 2	1349	-1.40096	0.000971484	0.00624537
ENSG00000163464	3577	CXCR1	2	2q35	chemokine (C-X-C motif) receptor 1	2488	-1.40361	0.00402129	0.0197983
ENSG00000120156	7010	TEK	9	9p21	TEK tyrosine kinase, endothelial	4805	-1.40373	0.000769559	0.00520965
ENSG00000053747	3909	LAMA3	18	18q11.2	laminin subunit alpha 3	13522	-1.40555	0.000451434	0.00338571
ENSG00000101224	994	CDC25B	20	20p13	cell division cycle 25B	4314	-1.40686	2.21e-05	0.000338872
ENSG00000172264	140733	MACROD2	20	20p12.1	MACRO domain containing 2	11344	-1.40991	0.00771376	0.0334097
ENSG00000177303	57513	CASKIN2	17	17q25.1	CASK interacting protein 2	5823	-1.41001	0.000252028	0.00214511
ENSG00000166900	6809	STX3	11	11q12.1	syntaxin 3	6566	-1.41414	8.68e-06	0.000172381
ENSG00000184185	3768	KCNJ12	17	17p11.2	potassium channel, inwardly rectifying subfamily J, member 12	5617	-1.4176	4.55e-05	0.000580707
ENSG00000178385	389072	PLEKHM3	2	2q33.3	pleckstrin homology domain containing M3	4656	-1.41902	0.000725966	0.00495198
ENSG00000163817	54716	SLC6A20	3	3p21.3	solute carrier family 6 (proline IMINO transporter), member 20	6651	-1.41946	0.000766454	0.00519125
ENSG00000112782	53405	CLIC5	6	6p12.3	chloride intracellular channel 5	8997	-1.42066	0.000582135	0.00414783
ENSG00000143546	6279	S100A8	1	1q21	S100 calcium binding protein A8	1006	-1.42067	0.000422966	0.00321862
ENSG00000180061	284417	TMEM150B	19	19q13.42	transmembrane protein 150B	1713	-1.42965	0.000187147	0.0016847
ENSG00000118526	6943	TCF21	6	6q23.2	transcription factor 21	4551	-1.43933	0.000285392	0.00236611
ENSG00000091136	3912	LAMB1	7	7q22	laminin subunit beta 1	8140	-1.43989	0.000171541	0.00157202
ENSG00000185950	8660	IRS2	13	13q34	insulin receptor substrate 2	8138	-1.44032	4.59e-06	0.000107604
ENSG00000115648	79083	MLPH	2	2q37.3	melanophilin	7514	-1.44184	0.000117972	0.0011851
ENSG00000196569	3908	LAMA2	6	6q22-q23	laminin subunit alpha 2	10094	-1.44285	0.000502565	0.00369051
ENSG00000168497	8436	SDPR	2	2q32-q33	serum deprivation response	3229	-1.44466	5.61e-05	0.000679798
ENSG00000070404	10272	FSTL3	19	19p13	follistatin-like 3 (secreted glycoprotein)	3067	-1.44982	0.000124712	0.00123344
ENSG00000088387	23348	DOCK9	13	13q32.3	dedicator of cytokinesis 9	13945	-1.45432	4.6e-05	0.000585014
ENSG00000206538	389136	VGLL3	3	3p12.1	vestigial like family member 3	11574	-1.45477	0.00165621	0.00957577
ENSG00000008311	10157	AASS	7	7q31.3	aminoadipate-semialdehyde synthase	4591	-1.45561	0.00127896	0.00773421
ENSG00000143171	6258	RXRG	1	1q22-q23	retinoid X receptor gamma	2696	-1.45723	0.000379429	0.00295648
ENSG00000188305	374872	C19orf35	19	19p13.3	chromosome 19 open reading frame 35	2574	-1.45759	0.000632646	0.00442554
ENSG00000125144	4495	MT1G	16	16q13	metallothionein 1G	750	-1.45775	0.00288015	0.0149877
ENSG00000188211	374383	NCR3LG1	11	11p15.1	natural killer cell cytotoxicity receptor 3 ligand 1	6438	-1.45814	0.00762664	0.0331478
ENSG00000183607	200504	GKN2	2	2p13.3	gastrokine 2	1653	-1.45905	0.00129447	0.00781394
ENSG00000164659	222223	KIAA1324L	7	7q21.12	KIAA1324-like	8115	-1.46333	2.99e-05	0.000420617
ENSG00000111452	283383	ADGRD1	12	12q24.33	adhesion G protein-coupled receptor D1	14718	-1.47151	3.65e-05	0.000484851
ENSG00000188493	284325	C19orf54	19	19q13.2	chromosome 19 open reading frame 54	3375	-1.47213	1.46e-06	4.48e-05
ENSG00000173482	5797	PTPRM	18	18p11.2	protein tyrosine phosphatase, receptor type, M	9900	-1.47708	7.54e-06	0.000155722
ENSG00000172893	1717	DHCR7	11	11q13.4	7-dehydrocholesterol reductase	4160	-1.47805	5.03e-06	0.000114208
ENSG00000100031	2678	GGT1	22	22q11.23	gamma-glutamyltransferase 1	4434	-1.48036	2.53e-05	0.000371098
ENSG00000221972	80111	C3orf36	3	3q22.1	chromosome 3 open reading frame 36	1668	-1.4826	0.00247677	0.0132426
ENSG00000104728	9639	ARHGEF10	8	8p23	Rho guanine nucleotide exchange factor 10	10792	-1.48283	2.53e-05	0.000370704
ENSG00000090013	645	BLVRB	19	19q13.1-q13.2	biliverdin reductase B	1665	-1.48504	1.25e-07	7.96e-06
ENSG00000140254	90527	DUOXA1	15	15q21.1	dual oxidase maturation factor 1	3721	-1.48673	0.000121681	0.00120702
ENSG00000242265	23089	PEG10	7	7q21	paternally expressed 10	6689	-1.4881	0.000426321	0.00323864
ENSG00000105339	22898	DENND3	8	8q24.3	DENN/MADD domain containing 3	14670	-1.48926	2.98e-05	0.000419798
ENSG00000185274	64409	WBSCR17	7	7q11.23	Williams-Beuren syndrome chromosome region 17	4870	-1.48942	1.95e-05	0.000311921
ENSG00000185303	729238	SFTPA2	10	10q22.3	surfactant protein A2	2685	-1.49056	0.00260351	0.0138049
ENSG00000004799	5166	PDK4	7	7q21.3	pyruvate dehydrogenase kinase, isozyme 4	4519	-1.49059	0.0063561	0.0286088
ENSG00000172840	57546	PDP2	16	16q22.1	pyruvate dehyrogenase phosphatase catalytic subunit 2	8364	-1.49182	2.39e-06	6.49e-05
ENSG00000159339	23569	PADI4	1	1p36.13	peptidyl arginine deiminase, type IV	2971	-1.49286	0.00111045	0.00693049
ENSG00000087495	116154	PHACTR3	20	20q13.32-q13.33	phosphatase and actin regulator 3	6095	-1.49469	9.48e-06	0.000182676
ENSG00000167641	94274	PPP1R14A	19	19q13.1	protein phosphatase 1 regulatory inhibitor subunit 14A	1501	-1.49517	2.54e-05	0.0003715
ENSG00000103313	4210	MEFV	16	16p13.3	Mediterranean fever	4819	-1.49752	2.39e-05	0.000356383
ENSG00000197822	100506658	OCLN	5	5q13.1	occludin	6761	-1.49889	1.41e-05	0.000247741
[truncated: 321 more rows]

## Sheet: DEG (IPF.P vs IPF.C)
Ensembl ID	NCBI Gene ID	Gene Symbol	chr	chr.band	Description	Length	LogFoldChange	P.Value	adj.P.Val
ENSG00000196611	4312	MMP1	11	11q22.3	matrix metallopeptidase 1	1970	3.3754	0.000200692	0.00604371
ENSG00000188293	374918	IGFL1	19	19q13.32	IGF like family member 1	769	3.18479	0.000200504	0.00604371
ENSG00000169469	6699	SPRR1B	1	1q21-q22	small proline-rich protein 1B	620	2.88985	6.72e-05	0.00347136
ENSG00000171711	1673	DEFB4A	8	8p23.1	defensin beta 4A	380	2.7866	0.000513982	0.0107366
ENSG00000164265	117156	SCGB3A2	5	5q32	secretoglobin, family 3A, member 2	1075	2.70503	8.26e-05	0.0038903
ENSG00000137745	4322	MMP13	11	11q22.3	matrix metallopeptidase 13	2834	2.70149	2.7e-05	0.00232107
ENSG00000104140	171177	RHOV	15	15q13.3	ras homolog family member V	1705	2.64921	7.87e-06	0.00148942
ENSG00000205420	3853	KRT6A	12	12q13.13	keratin 6A, type II	2928	2.64406	0.00135346	0.0189358
ENSG00000167656	8581	LY6D	8	8q24	lymphocyte antigen 6 complex, locus D	1553	2.56661	0.00312971	0.0307274
ENSG00000163207	3713	IVL	1	1q21	involucrin	2153	2.54762	2.57e-05	0.00229428
ENSG00000137673	4316	MMP7	11	11q22.2	matrix metallopeptidase 7	2323	2.48989	4.43e-07	0.00059488
ENSG00000125999	92747	BPIFB1	20	20q11.21	BPI fold containing family B member 1	3101	2.47259	0.00454738	0.0386801
ENSG00000149043	90019	SYT8	11	11p15.5	synaptotagmin 8	4704	2.45235	1.63e-07	0.000446132
ENSG00000196754	6273	S100A2	1	1q21	S100 calcium binding protein A2	1567	2.43159	8.13e-05	0.00387383
ENSG00000118785	6696	SPP1	4	4q22.1	secreted phosphoprotein 1	2321	2.31773	0.0016328	0.0211846
ENSG00000244094	6705	SPRR2F	1	1q21-q22	small proline-rich protein 2F	681	2.31045	0.000136793	0.00514252
ENSG00000086570	2196	FAT2	5	5q33.1	FAT atypical cadherin 2	14537	2.29026	9.37e-05	0.00417995
ENSG00000065618	1308	COL17A1	10	10q24.3	collagen, type XVII, alpha 1	6426	2.26549	3.89e-05	0.00269324
ENSG00000140067	90050	FAM181A	14	14q32.12	family with sequence similarity 181 member A	2202	2.24263	1.35e-07	0.000446132
ENSG00000138271	53836	GPR87	3	3q24	G protein-coupled receptor 87	1698	2.23881	0.000223127	0.00645504
ENSG00000167165	54578	UGT1A6	2	2q37	UDP glucuronosyltransferase 1 family, polypeptide A6	5180	2.23778	0.000607473	0.0118075
ENSG00000172551	118430	MUCL1	12	12q	mucin-like 1	1250	2.22261	0.000589899	0.0116857
ENSG00000189280	2709	GJB5	1	1p35.1	gap junction protein beta 5	1355	2.21109	0.00158806	0.0208701
ENSG00000204866	147920	IGFL2	19	19q13.32	IGF like family member 2	2426	2.20179	0.000138842	0.00514252
ENSG00000186081	3852	KRT5	12	12q13.13	keratin 5, type II	4292	2.19539	0.00380254	0.0345782
ENSG00000134762	1825	DSC3	18	18q12.1	desmocollin 3	7056	2.17481	0.000437167	0.00981871
ENSG00000186474	43849	KLK12	19	19q13.33	kallikrein related peptidase 12	1769	2.15813	0.000119873	0.00469393
ENSG00000133101	8900	CCNA1	13	13q12.3-q13	cyclin A1	2400	2.14123	6.2e-07	0.00059488
[truncated: 815 more rows]
